# Supplementary material for: Structure elucidation of the redox cofactor mycofactocin reveals oligo-glycosylation by MftF
Source: Royal Society of Chemistry journal article supplement (doi:10.1039/d0sc01172j), 2020-01-01
Supplement: d0sc01172j5.pdf [file d0sc01172j5.pdf]

## Electronic Supplementary Information - Appendix

### Structure elucidation of the redox cofactor mycofactocin reveals oligoglycosylation by MftF.

Luis Peña-Ortiz<sup>1,2</sup>, Ana Patrícia Graça<sup>1,2</sup>, Huijuan Guo<sup>3</sup>, Daniel Braga<sup>1,2</sup>, Tobias G. Köllner<sup>4</sup>, Lars Regestein<sup>5</sup>, Christine Beemelmans<sup>3</sup>, and Gerald Lackner<sup>1,2\*</sup>

#### AUTHOR AFFILIATIONS

<sup>1</sup>Junior Research Group Synthetic Microbiology  
Leibniz Institute for Natural Product Research and Infection Biology (HKI)  
Beutenbergstr. 11a, 07745 Jena, Germany

<sup>2</sup>Friedrich Schiller University  
Beutenbergstr. 11a, 07745 Jena, Germany

<sup>3</sup>Junior Research Group Chemical Biology of Microbe-Host Interactions  
Leibniz Institute for Natural Product Research and Infection Biology (HKI)  
Beutenbergstr. 11a, 07745 Jena, Germany

<sup>4</sup>Department of Biochemistry  
Max Planck Institute for Chemical Ecology  
Hans-Knöll-Str. 8, 07745 Jena, Germany

<sup>5</sup>Bio Pilot Plant  
Leibniz Institute for Natural Product Research and Infection Biology (HKI)  
Beutenbergstr. 11a, 07745 Jena, Germany

#### \* Corresponding Author:

Dr. Gerald Lackner  
Junior Research Group Synthetic Microbiology  
Leibniz Institute for Natural Product Research and Infection Biology (HKI)  
Beutenbergstr. 11a, 07745 Jena, Germany  
E-mail: [gerald.lackner@leibniz-hki.de](mailto:gerald.lackner@leibniz-hki.de)  
Phone: +49 3641 532 1104

#### ABSTRACT

Mycofactocin (MFT) is a redox cofactor belonging to the family of ribosomally synthesized and post-translationally modified peptides (RiPPs) and is involved in alcohol metabolism of mycobacteria including *Mycobacterium tuberculosis*. A preliminary biosynthetic model had been established by bioinformatics and *in-vitro* studies, while the structure of natural MFT and key biosynthetic steps remained elusive. Here, we report the discovery of glycosylated MFT by <sup>13</sup>C-labeling metabolomics and establish a model of its biosynthesis in *Mycolicibacterium smegmatis*. Extensive structure elucidation including NMR revealed that MFT is decorated with up to nine  $\beta$ -1,4-linked glucose residues including 2-O-methylglucose. Dissection of biosynthetic genes demonstrated that the oligoglycosylation is catalyzed by the glycosyltransferase MftF. Furthermore, we confirm the redox cofactor function of glycosylated MFTs by activity-based metabolic profiling using the carveol dehydrogenase LimC and show that the MFT pool expands during cultivation on ethanol. Our results will guide future studies into the biochemical functions and physiological roles of MFT in bacteria.

## Table of Contents

|                                                                       |           |
|-----------------------------------------------------------------------|-----------|
| <b>Experimental</b> .....                                             | <b>3</b>  |
| Microbial strains and general cultivation conditions.....             | 3         |
| Generation of <i>M. smegmatis</i> mutant and complement strains ..... | 3         |
| Isotopic labeling of <i>M. smegmatis</i> .....                        | 3         |
| Comparative metabolomics studies .....                                | 4         |
| Metabolite extraction and LC-MS measurements.....                     | 4         |
| MS/MS networking.....                                                 | 4         |
| Bioinformatics analysis of the MftF primary structure .....           | 5         |
| Heterologous production and purification of LimC .....                | 5         |
| Activity-based metabolic profiling .....                              | 5         |
| Glucanase digestion of mycofactocins .....                            | 6         |
| Enrichment of the MMFT-2b(H <sub>2</sub> ).....                       | 6         |
| Enrichment of MMFT-n .....                                            | 7         |
| Determination of the sugar composition .....                          | 7         |
| Permethylation .....                                                  | 7         |
| Acid hydrolysis .....                                                 | 7         |
| Methanolysis .....                                                    | 7         |
| Silylation and GC-MS .....                                            | 7         |
| Gas chromatography - mass spectrometry (GC-MS) .....                  | 8         |
| Purification of MMFT-7/8-H <sub>2</sub> .....                         | 8         |
| Nuclear magnetic resonance (NMR) spectroscopy.....                    | 8         |
| <b>Results and Discussion</b> .....                                   | <b>9</b>  |
| Discovery of mycofactocins .....                                      | 9         |
| GC-MS analyses of the oligosaccharide moiety .....                    | 12        |
| Structure elucidation of MMFT-7/8-H <sub>2</sub> by NMR.....          | 28        |
| Additional results.....                                               | 35        |
| <b>Plasmid Sequences</b> .....                                        | <b>38</b> |
| <b>References</b> .....                                               | <b>43</b> |

## Experimental

### Microbial strains and general cultivation conditions

The *M. smegmatis* MC2 155 WT and mutant strains  $\Delta mftC$ ,  $\Delta mftD$ ,  $\Delta mftE$  and  $\Delta mftF$  were maintained in lysogeny broth (LB), supplemented with 0.05% Tween80 (LB-Tween) at 37 °C and 180 rpm. Complement mutants *M. smegmatis* *mftC*-Comp and *mftF*-Comp were maintained in media containing kanamycin (20  $\mu\text{g mL}^{-1}$ ). *Escherichia coli* TOP10 was grown in LB supplemented with kanamycin (30  $\mu\text{g mL}^{-1}$ ) at 37 °C for the generation and maintenance of pMCpAINT-derived plasmids. Metabolomics studies were carried in adapted HdB medium (Berney, Weimar et al., 2012) containing 3 g L<sup>-1</sup> Na<sub>2</sub>HPO<sub>4</sub>. Liquid cultures were supplemented with 0.5 g L<sup>-1</sup> tyloxapol, 10 g L<sup>-1</sup> glucose (w/v) or 10 g L<sup>-1</sup> ethanol (w/v) at 37 °C and 180 rpm.

### Generation of *M. smegmatis* mutant and complement strains

Scarless mutants of biosynthetic genes of *M. smegmatis* ( $\Delta mftC$ ,  $\Delta mftD$ ,  $\Delta mftE$ ,  $\Delta mftF$ ) as well as the *mftC* complement strain ( $\Delta mftC$ -Comp) were obtained from the Kaufmann laboratory (Krishnamoorthy, Kaiser et al., 2019). For the genetic complementation of *M. smegmatis*  $\Delta mftF$ , the promoter and the ribosome binding site of *mftA* were combined with the *mftF* coding sequence (obtained as a synthetic DNA construct) and cloned as an insert of the integrative plasmid pMCpAINT (Warner, Ndwandwe et al., 2010) yielding plasmid pPG20 (Figure S31). After transformation of electrocompetent cells of *M. smegmatis* by electroporation, positive clones ( $\Delta mftF$ -Comp) were selected on kanamycin (20  $\mu\text{g mL}^{-1}$ ). Complement mutants were confirmed phenotypically by the (restored) ability to grow in HdB supplemented with 10 g L<sup>-1</sup> ethanol as a sole source of carbon as well as genetically by positive PCR amplification of the *mftF* gene using the following primers: INT\_mftF\_F: 5'-ACTTCTCCGGTATGCACTGC-3' and INT\_mftF\_R1: 5'-ACAGATCGCCGAACACAACACT-3'.

### Isotopic labeling of *M. smegmatis*

A saturated pre-culture of *M. smegmatis* MC<sup>2</sup> 155 WT in LB broth was used to inoculate 25 mL of HdB medium supplemented with 0.5 g L<sup>-1</sup> tyloxapol and 10 g L<sup>-1</sup> ethanol to an initial optical density at 600 nm (OD<sub>600</sub>) of 0.1. Cultivations contained 1 mM L-tyrosine-<sup>13</sup>C<sub>9</sub> (99% atom purity, Cortecnet) and 1 mM L-valine-<sup>13</sup>C<sub>5</sub> (99% atom purity, Merck) and were conducted in four replicates at 37 °C and 180 rpm for 24 h. Cultures (10 mL of a 10-fold dilution) were poured onto sterile regenerated cellulose filters (0.2  $\mu\text{m}$ , Sartorius) previously conditioned with water. The biomass was repeatedly washed with sterile water and transferred to HdB agar plates with 10 g L<sup>-1</sup> ethanol and with either light or heavy L-valine and L-tyrosine supplementation, as appropriate. Filters inoculated with sterile media were used as control. Directly after the incubation period (37 °C for 48 h), the filters were extracted and subjected to LC-MS measurements as described below. Data analysis was performed with the Stable Isotope Labeling workflow of Compound Discoverer 3.0 (Thermo Scientific) allowing for a maximum exchange of 16 <sup>13</sup>C atoms. Independent analyses were performed for the lower and higher scan ranges. A minimal peak intensity cut-off of 10<sup>4</sup> was defined for compound detection. Compounds with the same mass ( $\pm 5$  ppm) and eluting within 0.2 min from each other were grouped. Molecules were considered candidates potentially comprising the decarboxylated Val-Tyr core peptide (*i.e.* AHDP moiety) if a relative <sup>13</sup>C-exchange rate higher than 50% was observed. Low abundance compounds (area <1000) and candidates containing a high proportion of contaminating masses were disregarded.

## Comparative metabolomics studies

Cultures of *M. smegmatis* MC<sup>2</sup> 155 WT as well as  $\Delta mftC$ ,  $\Delta mftD$ ,  $\Delta mftE$ ,  $\Delta mftF$ ,  $\Delta mftC$ -Comp and  $\Delta mftF$ -Comp growing in LB supplemented with 0.05% of Tween80 were used to inoculate sterile regenerated cellulose filters as described before, standardizing all the cultures to the same concentration. The filters were incubated in HdB supplemented with 10 g L<sup>-1</sup> glucose at 37 °C for 18h. Afterwards, the filters were transferred to a new HdB plate supplemented either with 10 g L<sup>-1</sup> of glucose or 10 g L<sup>-1</sup> ethanol and incubated at 37°C for 18h. This study was carried out in triplicates and filters incubated with media were used as control (blank). Directly after the incubation period, the filters were further extracted and subjected to LC-MS measurements as described below. Targeted studies were performed using the Expected Compounds node in Compound Discoverer 3 with an Expected Compounds table including AHDP, PMFT, PMTH<sub>2</sub>, MFT-1 and MFT-1H2 allowing for multiple glycosylation and methylation events. Compounds from different runs with the same mass (< 5 ppm deviation) and eluting within 0.2 min from each other were grouped. Median of areas under the curve of three replicates was used to compute ratios between groups.

## Metabolite extraction and LC-MS measurements

Filters were recovered with sterile tweezers and placed on 20 mL chilled extraction mixture (acetonitrile:methanol:water 60:20:20 with 0.1% formic acid). Bottles were placed one hour at -80 °C, sonicated for 5 min in an ultrasonic bath at room temperature and frozen. The lysis procedure was repeated three times. After the last ultrasound treatment, extract was transferred to round flasks, frozen and lyophilized. The dry extract was resuspended in 950  $\mu$ L ddH<sub>2</sub>O, centrifuged twice and the final extract was saved in HPLC vials at -20 °C until measurement. LC-MS measurements were performed on a Dionex Ultimate 3000 system combined with a Q Exactive Plus mass spectrometer (Thermo Scientific) equipped with a heated electrospray ion source (HESI). Metabolite separation was carried out using a Phenomenex Kinetex XB-C18 column (150  $\times$  2.1 mm, 2.6  $\mu$ m, 100 Å) preceded by a Phenomenex SecurityGuard ULTRA guard cartridge (2  $\times$  2.1 mm). Mobile phases consisted of 0.1% formic acid in either water (A) or acetonitrile (B). 10  $\mu$ L of the sample were separated chromatographically at 40 °C and a constant flow rate of 300  $\mu$ L min<sup>-1</sup> as follows: 0-2 min, 2% B; 2-15 min 2-99% B; 15-18 min 99% B. Metabolite separation was followed by both full scan (MS<sup>1</sup>) and data-dependent MS/MS (MS<sup>1</sup> and Top10 MS/MS) analyses in positive ionization mode at two scan ranges:  $m/z$  200 to 600 and  $m/z$  580 to 2000. Spray quality was adjusted based on the ratio of water:acetonitrile. For the first 10 min of elution sheath gas flow rate was set to 35 and auxiliary gas flow rate to 7. For the following 12 min those values were set to 24 and 2, respectively. Capillary temperature was 320 °C, probe heater temperature was 230 °C, spray voltage was 4 kV, and S-lens RF level was 50 at all times. MS<sup>1</sup> had the resolving power set to 70,000 FWHM at  $m/z$  200, injection time to 100 ms, and AGC to 3E6. The ten most intense ions were selected for MS/MS with a scan rate of 12 Hz with a dynamic exclusion of 10 s. Resolving power was 17,500 FWHM at  $m/z$  200, AGC target was 1E5, and injection time was 50 ms. Isolation window was set to  $m/z$  1, while routine analysis was performed at 40 NCE (normalized collision energy). Targeted MS/MS spectra acquisition for the MFT congeners was performed at NCE values of 20, 30, and 40.

## MS/MS networking

*M. smegmatis* MC2 155 metabolome extracts were prepared as described before. Data-dependent (TOP 10) MS/MS data was acquired and converted to the mzXML format with the MSConvert tool (Chambers, Maclean et

al., 2012). Files were uploaded to the Global Natural Products Social Molecular Networking (GNPS) server (WangCarver et al., 2016) and analyzed with the Molecular Networking pipeline. Parameters were set as default except for the following: minimum cosine score (0.6) and minimum fragment ions (4). Results were visualized in Cytoscape 3.7 (Shannon, Markiel et al., 2003).

### **Bioinformatics analysis of the MftF primary structure**

The primary protein structure of several MftF homologues was downloaded from the NCBI database. Sequences were aligned using the MUSCLE algorithm (Edgar, 2004) implemented in Geneious Prime (2019.1.1). Prediction of transmembrane domains was performed using the TMHMM 2.0 webserver (Krogh, Larsson et al., 2001). Classification of MftF was performed by the carbohydrate-active enzymes database (CAZy) (Lombard, Golaconda Ramulu et al., 2014).

### **Heterologous production and purification of LimC**

The *limC* gene encoding the carveol dehydrogenase LimC (van der Werf, van der Ven et al., 1999) from *Rhodococcus erythropolis* DCL14 was obtained as a codon optimized synthetic construct inserted in vector pET28, in-frame with the N-terminal hexahistidine tag (plasmid pLAPO4, see Figure S31a). A single colony of *E. coli* BL21(DE3) freshly transformed with plasmid pLAPO4 was inoculated in 5 mL LB with kanamycin (50 µg mL<sup>-1</sup>) and cultured overnight at 37 °C and 210 rpm. A main culture (100 mL) was inoculated in LB media amended with the same antibiotic and cultured until an OD<sub>600</sub> of 0.5 – 0.6. At this point expression of *limC* was induced with IPTG (0.5 mM) and the temperature decreased to 16 °C, then further cultured for 18 – 20 h. Cells were harvested from the medium by centrifugation at 4000 × g and 4 °C for 30 min, then resuspended and washed in cold sodium chloride 0.85% and harvested again for 15 min, then frozen at -20 °C for future use or processed as follows. The cell pellet was resuspended in lysis buffer (50 mM NaH<sub>2</sub>PO<sub>4</sub>, 300 mM NaCl, pH 8.2) containing 20 mM imidazole, disrupted with a Sonopuls ultrasonic sonifier (Bandelin), and centrifuged at 17000 × g, 4 °C for 30 min. The lysate was applied to 1.25 mL HisPur NiNTA resin (Thermo Fisher Scientific), pre-equilibrated with 10 column volumes of lysis buffer at the same imidazole concentration and allowed to flow at room temperature by gravity. The resin was washed with 10 CV of wash buffer (lysis buffer containing 30, 50, and 70 mM imidazole). The target protein was then eluted with 2.5 mL of lysis buffer containing 300 mM imidazole, then immediately rebuffered in 3.5 mL assay buffer (sodium citrate buffer 50 mM, pH 6) in a PD-10 gel filtration column (GE Healthcare) and concentrated to a final volume of 500 µL in a 3 kDa MWCO Vivaspin centrifugal filtration unit (Sartorius). The protein was detected by SDS-PAGE (Figure S30), protein concentration was determined with the Roti Nanoquant (Carl Roth) reagent following manufacturer instructions in relation to known concentrations of BSA in assay buffer. Positive enzymatic activity was confirmed by incubating with L-carveol (1 mM) in the presence of 0.1 mM DCPIP. Discoloration in the presence of carveol indicated positive activity.

### **Activity-based metabolic profiling**

Metabolome extracts of *M. smegmatis* MC<sup>2</sup> 155 were prepared as described above and used for activity-based metabolic profiling. Metabolome extract (10 µL of a 10-fold dilution) was mixed with 0.1 µg of purified LimC in assay

buffer (sodium citrate buffer 50 mM, pH 6) containing L-carveol (1 mM) in a 20  $\mu$ L reaction volume. Negative controls were performed without substrate or without enzyme. The reaction was quenched after 1 h of incubation at room temperature by adding 1 volume of LC-MS grade acetonitrile and centrifugation for 10 min at 4°C. 10  $\mu$ L were injected for LC-MS measurement as described below. Mycofactocinone and mycofactocinol species were identified using Compound Discoverer 3.1 based on  $m/z$  and retention time.

### Glucanase digestion of mycofactocins

Metabolome extracts of *M. smegmatis* MC<sup>2</sup> 155 were prepared as described above and mixed with 0.2 mU of commercial cellulase (1,4- $\beta$ -glucanase) from *Trichoderma reesii* ATCC 26921 (Merck) in 50 mM citrate-phosphate buffer at pH 5 (6.5 mM citric acid, 43.6 mM sodium phosphate) or 0.2 mU  $\alpha$ -amylase (1,4- $\alpha$ -glucanase) from *Bacillus licheniformis* (Merck) in citrate-phosphate buffer at pH 7 (24.3 mM citric acid, 25.7 mM sodium phosphate). Enzyme solutions were prepared at a concentration of 0.2 mU  $\mu$ L<sup>-1</sup>. 30  $\mu$ L reactions were set up with 1  $\mu$ L enzyme, 14  $\mu$ L of metabolome extract and 15  $\mu$ L of concentrated buffer (2  $\times$ ). Buffer replaced the enzyme solution at pH 5 or 7 in control measurements. The reaction was incubated for 1 hour at the optimum temperature for each enzyme, then quenched by the addition of 1 volume acetonitrile (LC-MS grade) and centrifuged at 12000  $\times$  g for 10 min. 5  $\mu$ L of the supernatant were injected for LC-MS measurements.

### Enrichment of the MMFT-2b(H<sub>2</sub>)

The first pre-culture of *M. smegmatis* WT was grown for 18 h in serum bottles under the following conditions: shaking frequency of 180 rpm, shaking diameter of 25 mm and a flask volume of 50 ml with 20 ml filling volume. The second pre-culture step was conducted in Erlenmeyer shake flasks for 18 h under the following cultivation conditions: shaking frequency of 180 rpm, shaking diameter of 25 mm and a flask volume of 2 L with a filling volume of 400 mL. The transferred volume of the second pre-culture was 1 L to inoculate a 75 L stirred tank reactor filled with 50 L LB medium supplemented with 20 g L<sup>-1</sup> ethanol and 20 g L<sup>-1</sup> glucose for 23.25 h of cultivation. To ensure aerobic conditions, the dissolved oxygen tension was controlled by the stirring rate and therefore always higher than 20%. The gas flow rate was constant at 0.5 vvm as well as the headspace overpressure of 0.2 bar. For biomass separation, the overall fermentation broth was filtered and the received cells were extracted twice with MeOH. The MeOH extract was separated from the cell debris by filtration and concentrated under reduced pressure. LC-MS analysis of crude MeOH extract revealed the presence of MMFT-2bH<sub>2</sub> with the major detectable mycofactocin species, with the observed molecular ion at  $m/z$  574.24945 ([M+H]<sup>+</sup>), and MMFT-2b in trace amounts, with the observed molecular ion at  $m/z$  572.23431 ([M+H]<sup>+</sup>). The concentrated MeOH extract was first suspended into 10% MeOH (50 mL) by ultrasonication, then fractionated by SPE-C18 cartridge (10 g) with the step elution by 10% MeOH, 20% MeOH, 30% MeOH, 40% MeOH, 50% MeOH, 60% MeOH, 80% MeOH, and pure MeOH, and concentrated under reduced pressure. LC-MS analysis of individual fractions indicated that the MMFT-2bH<sub>2</sub> was accumulated in 30% MeOH fraction, with a small amount in 40% – 60% MeOH. The 30% MeOH fraction, as well as 40% – 60% MeOH fractions were submitted to size exclusion by Sephadex LH20 eluted with 50% MeOH, and fractionated into six fractions. Following the LC-MS analysis of each fraction, the MMFT-2H<sub>2</sub> molecular ion was located in the third fraction (Fr.3-3). In the end the Fr.3-3 was submitted to semipreparative HPLC coupled with Phenomenex Luna C8 column (100 Å 250  $\times$  10 mm) and separated under the gradient of 0 – 5 min, 10% MeOH; 5 – 20 min, 10% – 60% MeOH; 20 – 25 min, 60% MeOH; 25 – 35 min, 60% – 100% MeOH; 35 – 40 min, 100%

MeOH, with the flow rate of 2.0 mL min<sup>-1</sup>. LC-MS indicated that MMFT-2bH<sub>2</sub> was enriched in the fraction with  $t_R = 22.6$  min, and the mixture of MMFT-2bH<sub>2</sub> and MMFT-2b was enriched in next fraction with  $t_R = 23.0$  min.

### **Enrichment of MMFT-n**

For large-scale cultivation, pre-cultures of *M. smegmatis* WT in LB-Tween were used (1:200) for inoculation of batches of 400 mL in 1 L flasks of LB-Tween supplemented with 10 g L<sup>-1</sup> ethanol. In total, 24 L culture broth was inoculated, centrifuged, and bacterial pellet was collected and frozen at -80 °C before extraction in batches. 200 mL of MeOH was added into a glass flask containing thawed bacteria and stirred at 4 °C overnight. The yellowish MeOH extract was filtrated and concentrated under reduced pressure, suspended into 10% MeOH by ultrasonication and finally loaded on a SPE C18 cartridge (5 g). The fractionation was performed by step elution with 10% MeOH, 20%, 30%, 40%, 50%, 60%, 80%, 100% MeOH. LC-MS analysis of individual fractions indicated that the MMFT-n was accumulated in 30% MeOH and 40% MeOH fractions. These two fractions were submitted to size exclusion by Sephadex LH20 eluted with 50% MeOH, and fractionated into six fractions, respectively. Based on the LC-MS analysis of each fractions, the MMFT-n(H<sub>2</sub>) enriched fraction was further purified by semipreparative HPLC. MMFT-n(H<sub>2</sub>) containing fractions ( $t_R = 22.48$  min) were pooled and submitted to sugar composition analysis mediated by chemical degradation, modification and finally by GC-MS analysis.

### **Determination of the sugar composition**

#### *Permethylation*

The enriched MMFT-n(H<sub>2</sub>) and MMFT-2b(H<sub>2</sub>) (50 µg) were transferred into a screw cap glass vial (4 mL), and dried completely in an evaporator (GeneVac). An amount of 0.5 mg of authentic standard cellulose was weighed into a 4 mL screw cap glass vial individually. To each of these samples, 0.5 mL of dried dimethyl sulfoxide (DMSO) was added together with 100 µL of iodomethane. To this solution 60 mg of finely ground NaOH was added in excess. (The pellets of NaOH were ground in a hot and dried mortar and pestle (120 °C oven for 30 min). The reaction was performed on a shaker at 50 °C for 30 min, and quenched by the addition of ice-cold water to prevent a high temperature and degradation. A liquid-liquid extraction using dichloromethane (DCM) and subsequent washes with ice-cold water were performed three times to remove NaOH and DMSO. The upper aqueous layer was discarded, and the remaining bottom organic layer containing permethylated products was collected and dried to completion.

#### *Acid hydrolysis*

50 µg of the enriched MMFT-n(H<sub>2</sub>) and MMFT-2b(H<sub>2</sub>), or permethylated products were transferred into a 4 mL screw cap glass vial and dried completely by GeneVac. The acid hydrolysis was performed by adding 1 mL of HCl (3 M, aq.) and kept at 95 °C for 5 hours. Afterwards, the whole mixture was dried thoroughly by GeneVac.

#### *Methanolysis*

50 µg of the enriched MMFT-n(H<sub>2</sub>), MMFT-2b(H<sub>2</sub>), or the permethylated products were transferred into 4 mL screw cap glass vial and dried completely by GeneVac. The methanolysis were performed by adding 1 mL of HCl in MeOH (1.25 M) and kept at 95 °C for 5 hours. Afterwards, the whole mixture was dried thoroughly by GeneVac.

#### *Silylation and GC-MS*

The released monosaccharide residues were derivatized with MSTFA (MSTFA: *N*-methyl-*N*-(trimethylsilyl)trifluoroacetamide) by adding 25  $\mu$ L dried pyridine and 25  $\mu$ L MSTFA and kept at 60 °C for 30 min. Silylated samples were subjected to analysis by GC-MS coupled with a ZB5 column as described below. The authentic standard monosaccharides (D-(+)-glucose, methyl- $\alpha$ -D-glucose, methyl- $\beta$ -D-glucose, 2-OMe-D-(+)-glucose, 3-OMe-D-glucose, 4-OMe-D-glucose, and 6-OMe-D-glucose) were purchased from Sigma-Aldrich or Carbosynth, derivatized and analyzed under the same procedure.

#### *Gas chromatography - mass spectrometry (GC-MS)*

GC-MS analysis was conducted using an Agilent 6890 Series gas chromatograph coupled to an Agilent 5973 quadrupole mass selective detector (interface temp, 270 °C; quadrupole temp, 150 °C; source temp, 230 °C; electron energy, 70 eV). Compounds were separated using a ZB5 column (Phenomenex, Aschaffenburg, Germany, 30 m  $\times$  0.25 mm  $\times$  0.25  $\mu$ m) and He (1.5 ml min<sup>-1</sup>) as carrier gas. The sample (1  $\mu$ L) was injected with a split of 50:1 at an initial oven temperature of 100 °C. The temperature was held for 2 min and then increased to 250 °C with a gradient of 7 °C min<sup>-1</sup>, and then further increased to 330 °C with a gradient of 100 °C min<sup>-1</sup> and a hold of 3 min. Compounds were identified by comparison of retention times and mass spectra to those of authentic standards or by reference spectra in the Wiley and National Institute of Standards and Technology (NIST) libraries.

#### **Purification of MMFT-7/8-H<sub>2</sub>**

Cultures of *M. smegmatis* WT were grown in a fermentor as described above. The pellet was re-extracted by 200 mL of 50% MeOH/50% H<sub>2</sub>O and 200 mL 40% MeOH/60% H<sub>2</sub>O under ultrasonication for 30 min, respectively. The yellow extract was collected by centrifugation under 10,000 g for 10 min at r.t. and concentrated under reduced pressure. The MeOH-H<sub>2</sub>O extracts were combined and further separated by SPE-C18 cartridge (5 g) performed by step elution from 10% MeOH, 20%, 30%, 40%, 50%, 60%, 80%, 100% MeOH. HRMS analysis of individual fractions indicated that the MMFT-*n* was accumulated in 30% MeOH and 40% MeOH fractions, in which the major species were MMFT-7-H<sub>2</sub> and -8-H<sub>2</sub> with dominate reduced form (*m/z* 1384.50804 and 1546.55939) and trace oxidative form (*m/z* 1382.49301 and 1544.54459). These two fractions (30% MeOH and 40% MeOH) were submitted to purify by semipreparative HPLC coupled with Phenomenex Luna C8 250 x 10 mm with the gradient: 0–5 min, 10% B; 5–20 min, 10%–60% B; 20–25 min, 60% B; 25–35 min, 60%–100% B; 35–40 min, 100% B; 40–42 min, 100%–10% B; 42–50 min, 10% B (A: ddH<sub>2</sub>O; B: MeOH) with the flow rate of 2.0 mL/min. Mixture of MMFT-7-H<sub>2</sub> and -8-H<sub>2</sub> fraction (0.88 mg) was collected at *t<sub>R</sub>* = 21.7 min and concentrated under reduced pressure by GeneVac.

#### **Nuclear magnetic resonance (NMR) spectroscopy**

NMR measurements were performed on a Bruker AVANCE III 600 MHz spectrometer, equipped with a Bruker Cryoplatfom. The chemical shifts are reported in parts per million (ppm) relative to the solvent residual peak of D<sub>2</sub>O (<sup>1</sup>H: 4.79 ppm, singlet).



## Results and Discussion

### Discovery of mycofactocins

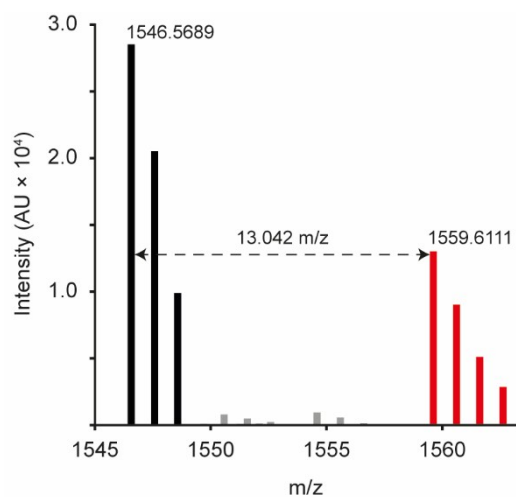

**Figure S1. Stable isotope labeling of MFT congeners.**

After feeding of L-Val-<sup>13</sup>C<sub>5</sub> and L-Tyr-<sup>13</sup>C<sub>9</sub>, the mass spectrum of MMFT-8H<sub>2</sub> (*m/z* 1546.56809, [M+H]<sup>+</sup>) demonstrated incorporation of 13 <sup>13</sup>C labels (expected mass shift: 13.04362 Da). Black: Natural isotope distribution of metabolites. Red: Isotope pattern of labeled metabolite. Figure represents an overlay of two individually recorded mass spectra.

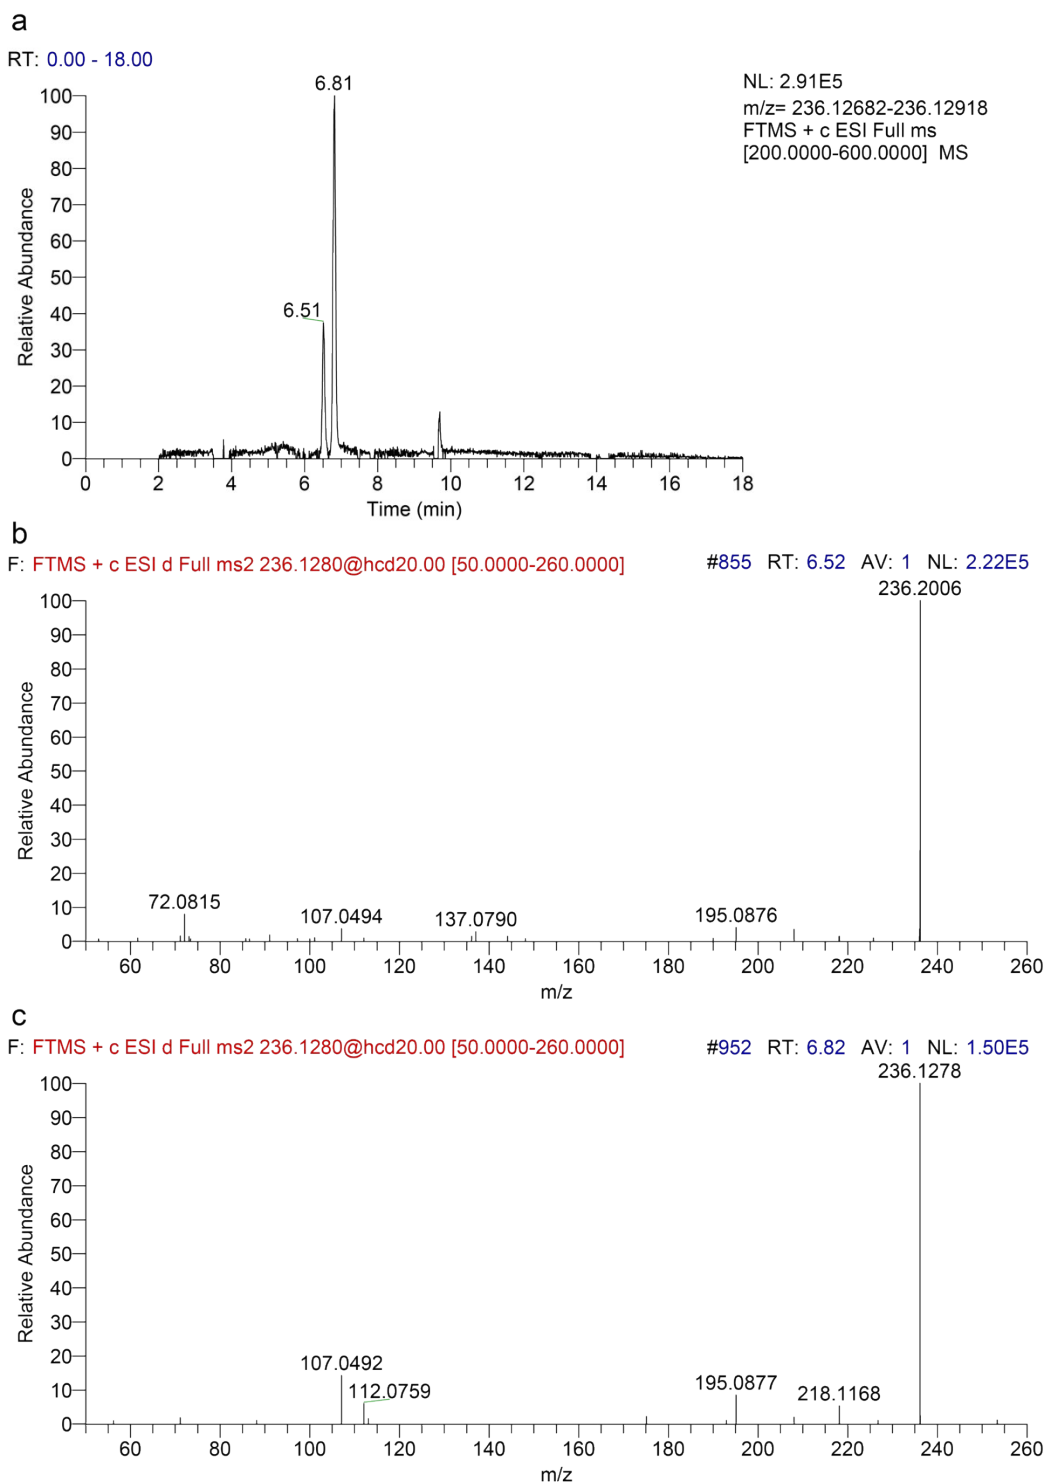

**Figure S2. Extracted ion chromatogram of two isomeric forms of PMFTH<sub>2</sub>.**

**a** Extracted ion chromatogram corresponding to PMFTH<sub>2</sub> ( $m/z$  236.12812 [M+H]<sup>+</sup>), showing two isomeric forms eluting at 6.51 (minor form) and 6.81 min (major form). **b** MS/MS spectrum of the minor isomer eluting at 6.52 min. **c** MS/MS spectrum of the dominant isomer eluting at ca 6.82 min. Near identical mass and MS/MS fragmentation and similar retention time suggest that the two isomers represent tautomers of each other.

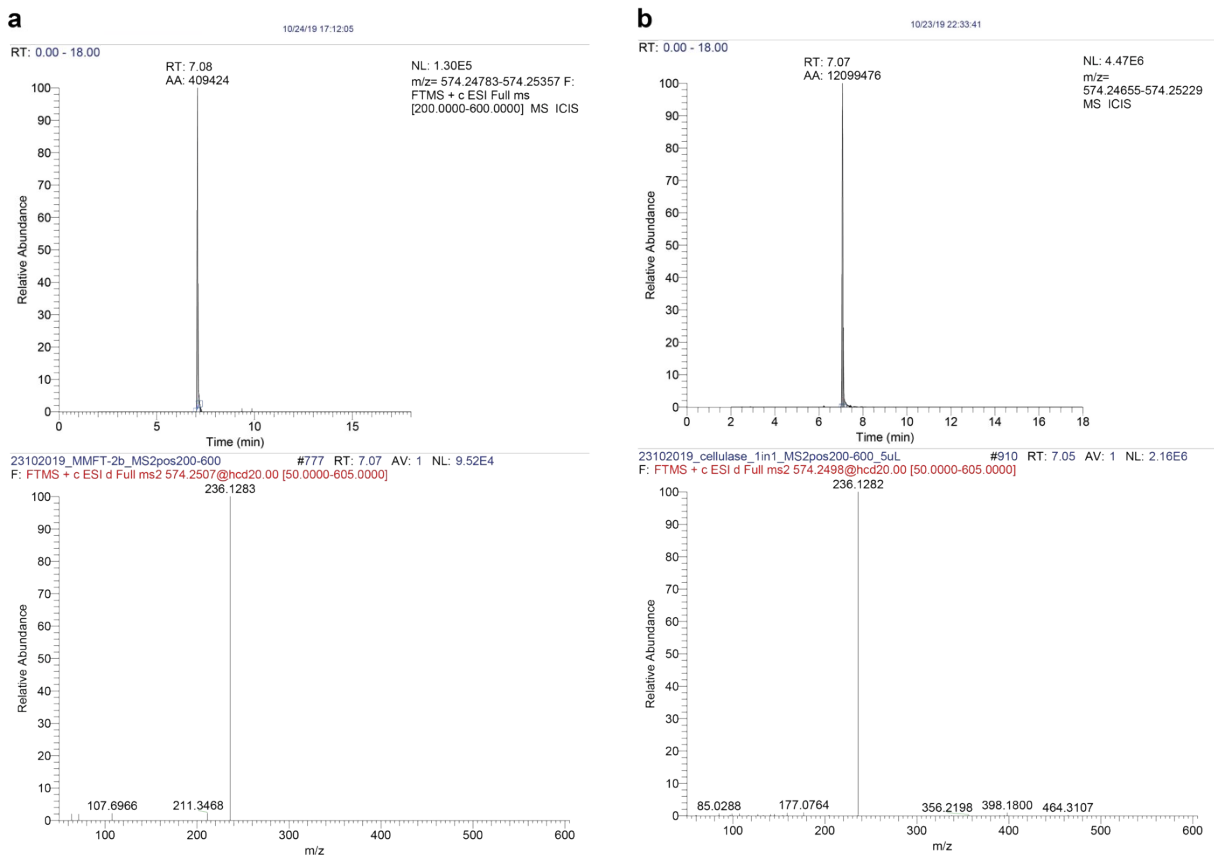

**Figure S3. Extracted ion chromatogram and mass spectrum of MMFT-2bH<sub>2</sub>.**

**a** MMFT-2bH<sub>2</sub> enriched from a large-scale cultivation (50 L) performed in a fermentor. The extracted ion chromatogram shows MMFT-2bH<sub>2</sub> ([M+H]<sup>+</sup> *m/z* 574.24640). The corresponding MS/MS spectrum is shown below. **b** MMFT-2bH<sub>2</sub> generated by cellulase treatment of mycofactocin extracts. The extracted ion chromatogram shows MMFT-2bH<sub>2</sub> ([M+H]<sup>+</sup> *m/z* 574.24640). The corresponding MS/MS spectrum is shown below. Both compounds are identical according to LC-MS/MS.

## GC-MS analyses of the oligosaccharide moiety

EIC @ 204.2

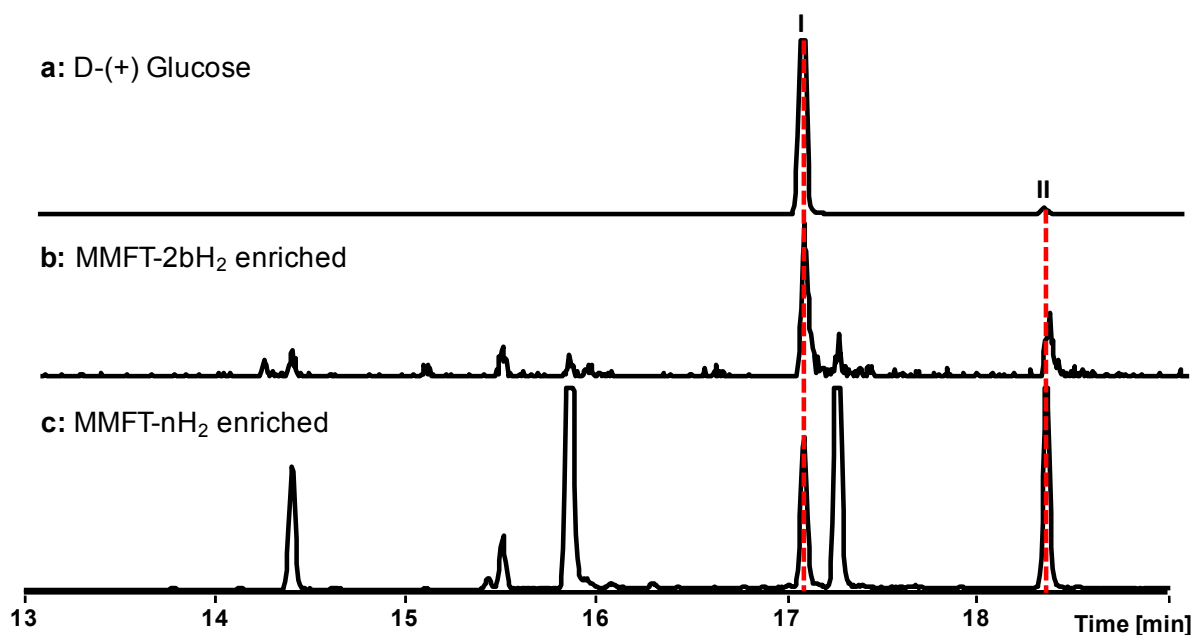

**Figure S4. Proposed monosaccharide composition in MMFT.**

**a** GC-MS chromatograms of D-(+)-glucose after MSTFA derivatization. **b** acid hydrolysis of MMFT-2bH<sub>2</sub> enriched fractions by 3 M HCl (aq.) and their perTMS derivatives. **c** acid hydrolysis of MMFT-n enriched fractions by 3 M HCl (aq.) and their perTMS derivatives. Compound I ( $t_R = 17.3$  min) and II ( $t_R = 18.4$  min): glucose-1,2,3,4,6-OTMS (GC-MS chromatograms were displayed under EIC mode at  $m/z$  204.2, which represented one of the diagnostic fragment ions of hexose-1,2,3,4,6-OTMS. MSTFA: *N*-methyl-*N*-(trimethylsilyl)trifluoroacetamide. TMS: trimethylsilyl. It should be noted that due to the low abundance of MMFT it was only possible to use enriched fractions for GC-MS analysis so that polysaccharide contaminations remained visible in the analysis.

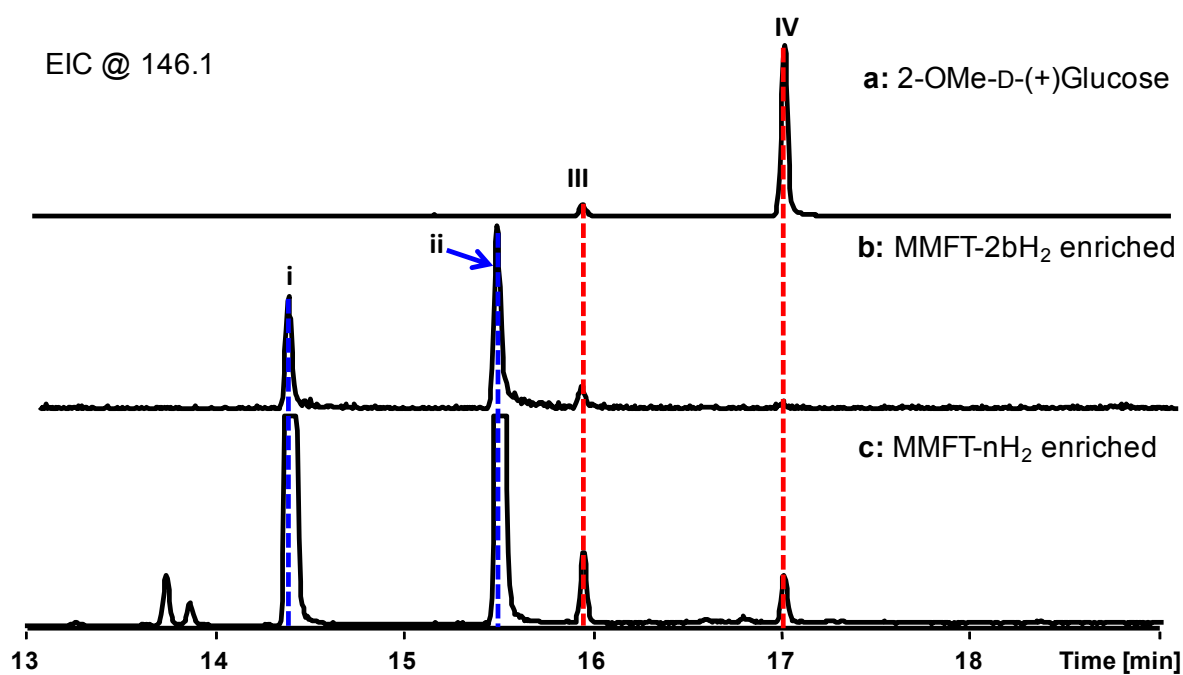

**Figure S5. Proposed methylated monosaccharide composition in MMFT.** **a** GC-MS chromatograms of 2-OMe-D-(+)-glucose after MSTFA derivatization. **b** acid hydrolysis of MMFT-2bH<sub>2</sub> enriched fractions by 3 M HCl (aq.) and their perTMS derivatives. **c** acid hydrolysis of MMFT-n enriched fractions by 3 M HCl (aq.) and their perTMS derivatives. **Compound III** ( $t_R = 16.0$  min) and **IV** ( $t_R = 17.0$  min): glucose-2-OMe-1,3,4,6-OTMS (GC-MS chromatograms were displayed under EIC mode at  $m/z$  146.1, which represented one of the diagnostic fragment ions of hexose-2-OMe-1,3,4,6-OTMS). **Compound i** ( $t_R = 14.4$  min) and **ii** ( $t_R = 15.5$  min): hexose-3-OMe-1,2,4,6-OTMS derived from polysaccharide contaminations.

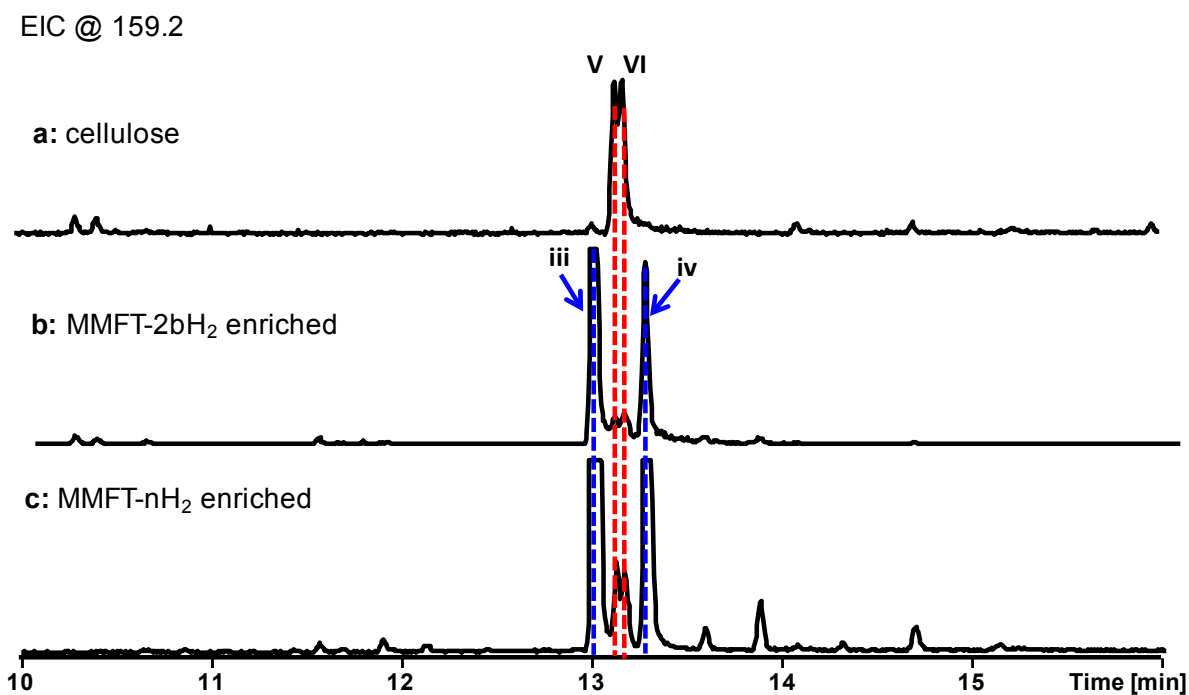

**Figure S6. Proposed monosaccharide linkage in MMFT.**

**a** GC-MS chromatogram of cellulose after permethylation and acid hydrolysis by 3 M HCl (aq.) and MSTFA derivatization. **b** MMFT-2bH<sub>2</sub> enriched fraction after permethylation and acid hydrolysis by 3 M HCl (aq.) and MSTFA derivatization. **c** MMFT-n enriched fraction after permethylation and acid hydrolysis by 3 M HCl (aq.) and MSTFA derivatization. **Compound V** ( $t_R = 13.21$  min) and **VI** ( $t_R = 13.26$  min) : glucose-2,3,6-OMe-1,4-OTMS (GC-MS chromatograms were displayed under EIC mode at  $m/z$  159.2, which represented one of the diagnostic fragment ions of hexose-2,3,6-OMe-1, 4-OTMS). **Compound iii** ( $t_R = 13.0$  min) and **iv** ( $t_R = 13.3$  min): hexose-2,3,6-OMe-1,4-OTMS derived from polysaccharide contaminations.

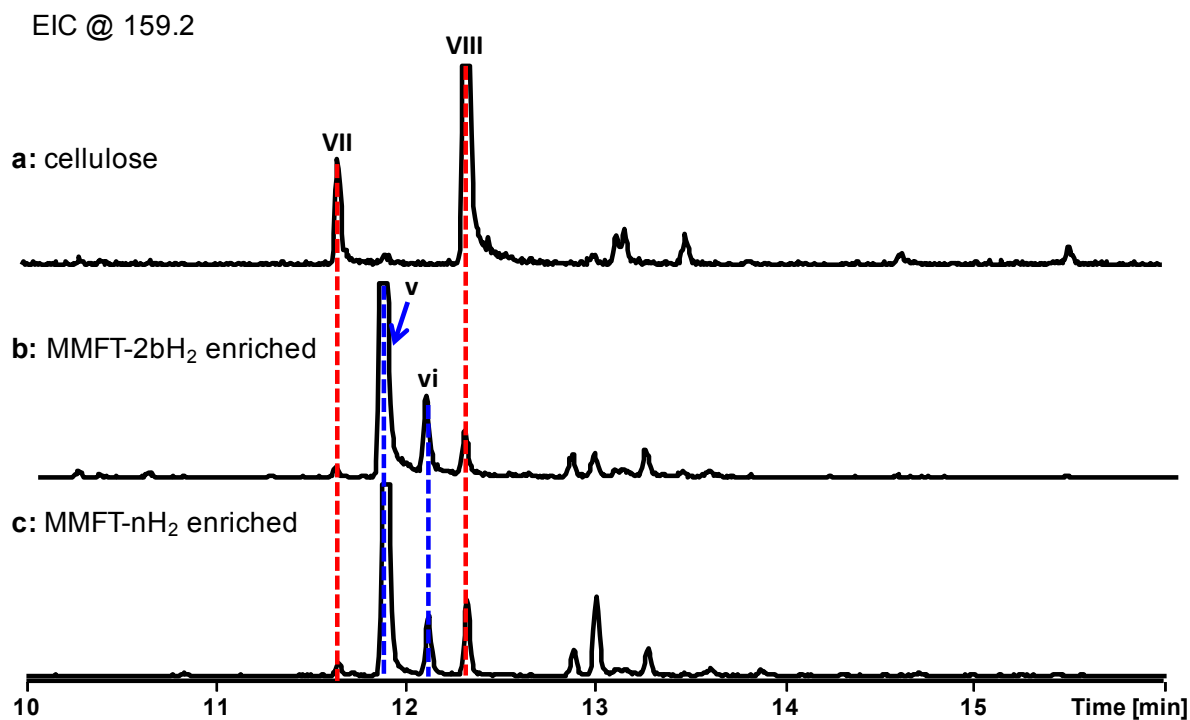

**Figure S7. Proposed monosaccharide linkage in MMFT.**

**a** GC-MS chromatogram of cellulose after permethylation and methanolysis by 1.25 M HCl (in MeOH) and MSTFA derivatization. **b** MMFT-2bH<sub>2</sub> enriched fraction after permethylation and methanolysis by 1.25 M HCl (in MeOH) and MSTFA derivatization **c** MMFT-n enriched fraction after permethylation and methanolysis by 1.25 M HCl (in MeOH) and MSTFA derivatization. **Compound VII** ( $t_R = 11.7$  min) and **VIII** ( $t_R = 12.3$  min): glucose-1,2,3,6-OMe-4-OTMS (GC-MS chromatograms were displayed under EIC mode at  $m/z$  159.2, which represented one of the diagnostic fragment ions of hexose-1,2,3,6-OMe-4-OTMS). **Compound v** ( $t_R = 11.9$  min) and **vi** ( $t_R = 12.1$  min): hexose-1,2,3,6-OMe-4-OTMS derived from polysaccharide contaminations.

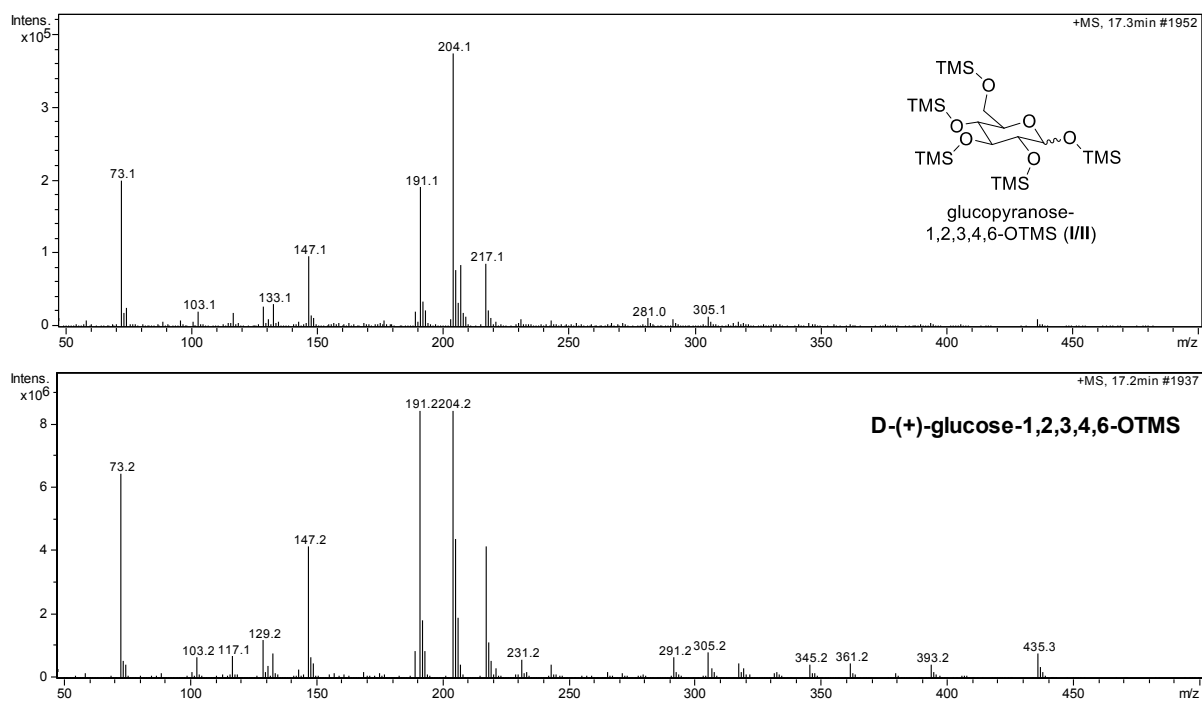

**Figure S8.** EI-MS spectra of compound I and standard D-(+)-glucose-1,2,3,4,6-OTMS.



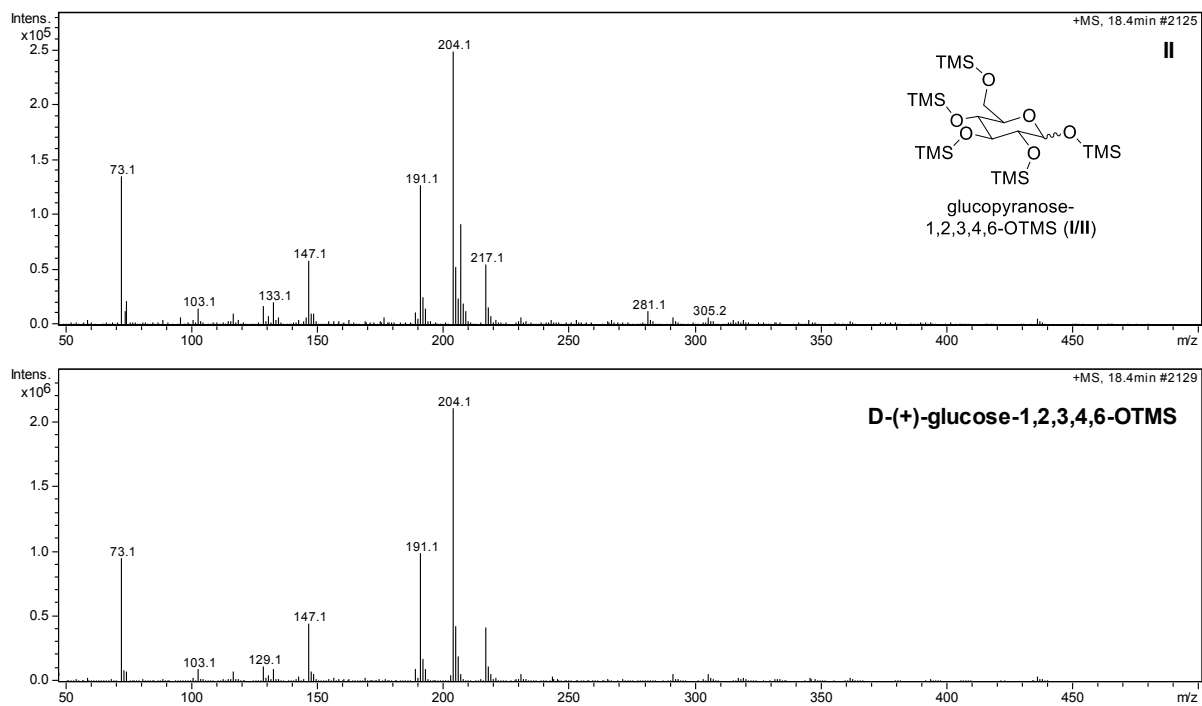

**Figure S9.** EI-MS spectra of compound II and standard D-(+)-glucose-1,2,3,4,6-OTMS.

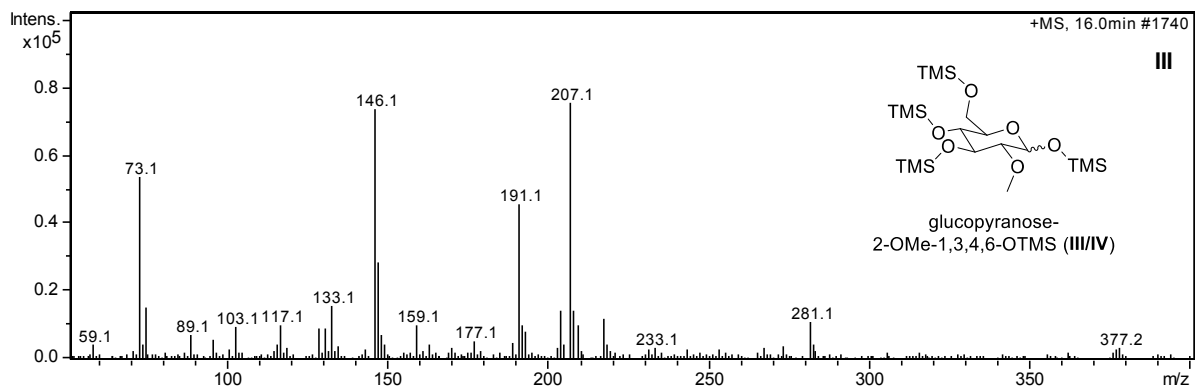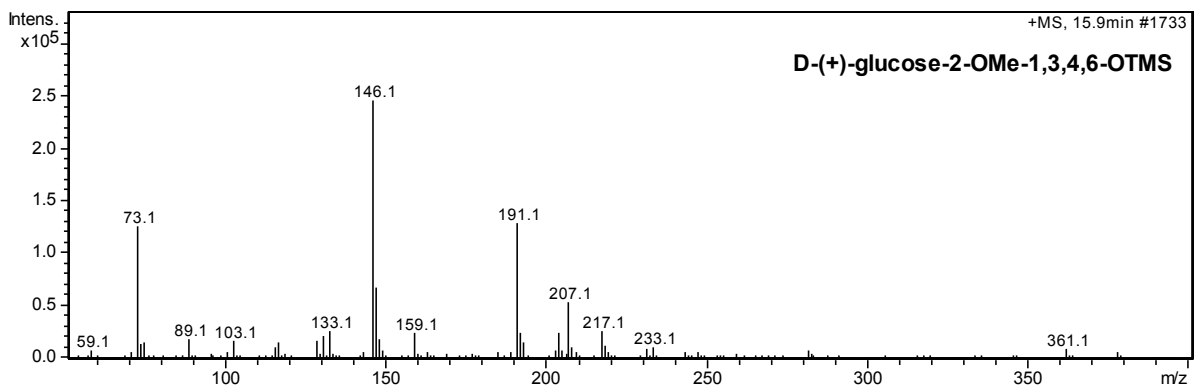

**Figure S10.** EI-MS spectra of compound III and standard D-(+)-glucose-2-OMe-1,3,4,6-OTMS

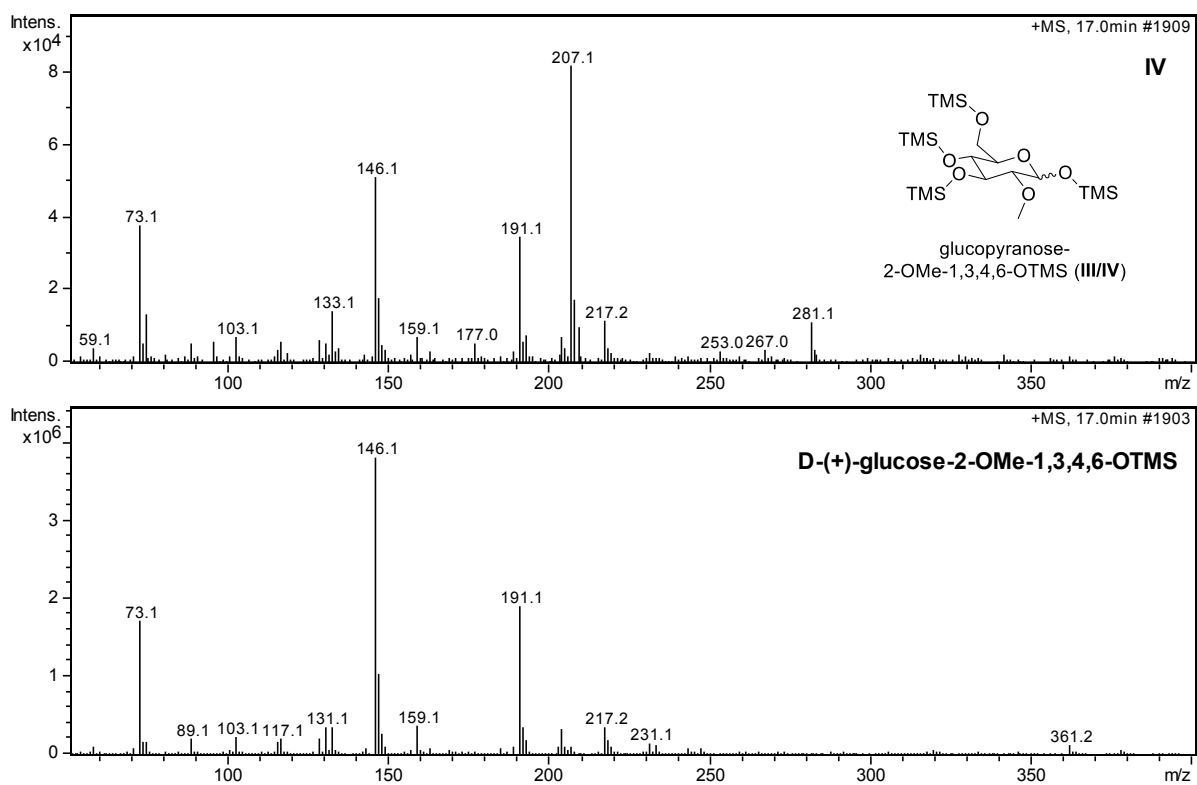

**Figure S11.** EI-MS spectra of compound IV and standard D-(+)-glucose-2-OMe-1,3,4,6-OTMS

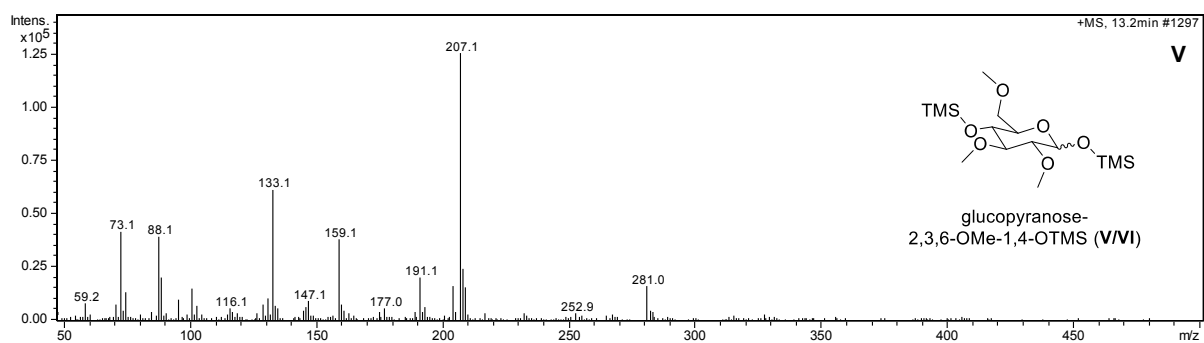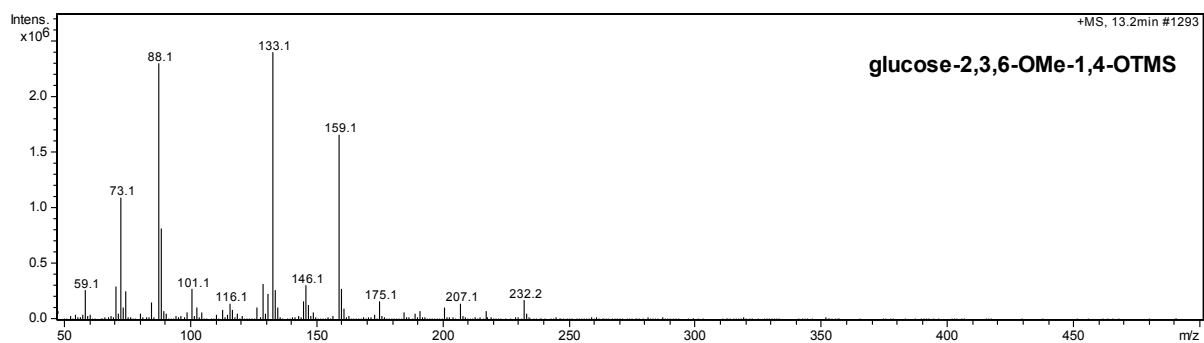

**Figure S12.** EI-MS spectra of compound V and glucose-2,3,6-OMe-1,4-OTMS derived from cellulose

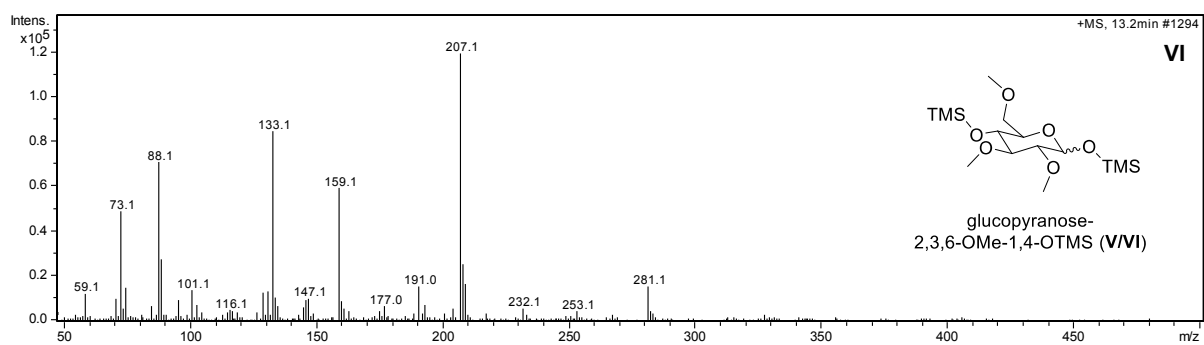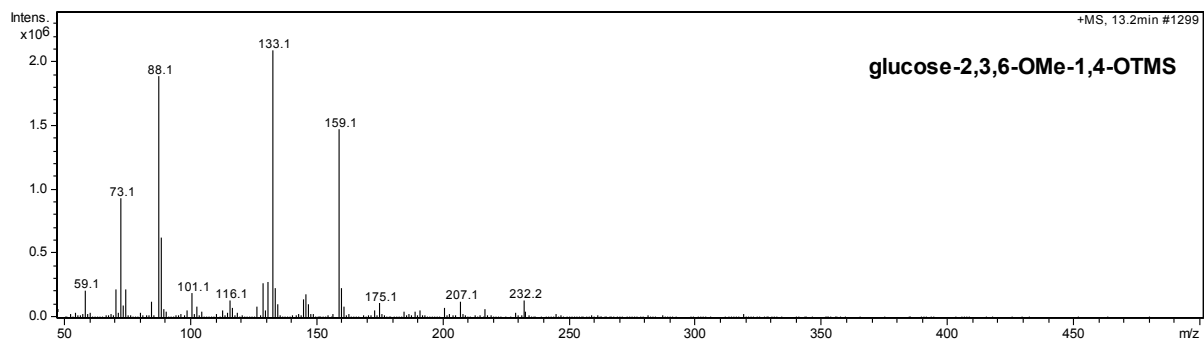

**Figure S13.** EI-MS spectra of compound VI and glucose-2,3,6-OMe-1,4-OTMS derived from cellulose

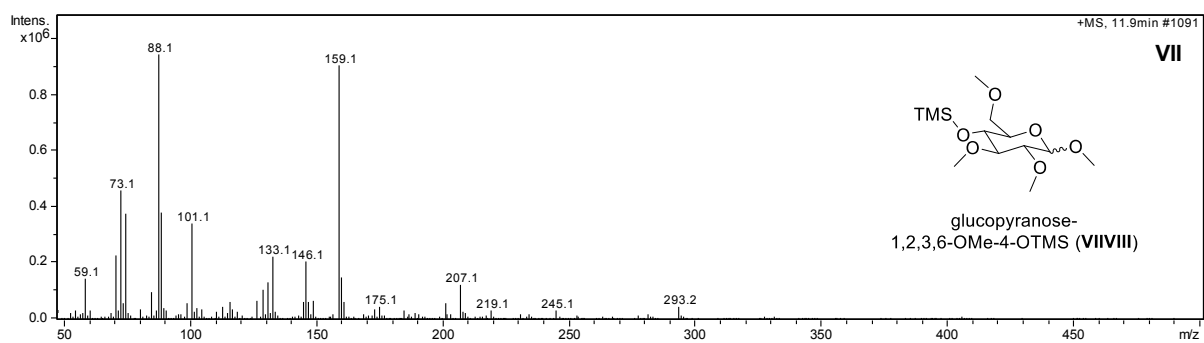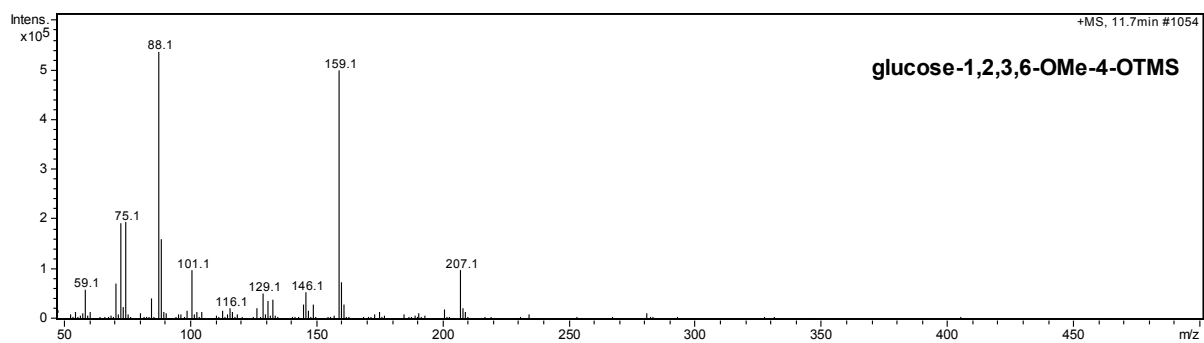

**Figure S14.** EI-MS spectra of compound VII and glucose-1,2,3,6-OMe-4-OTMS derived from cellulose

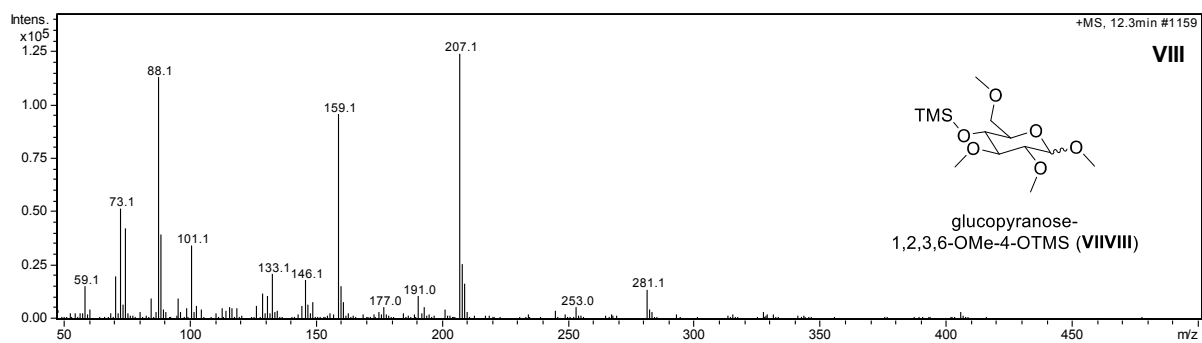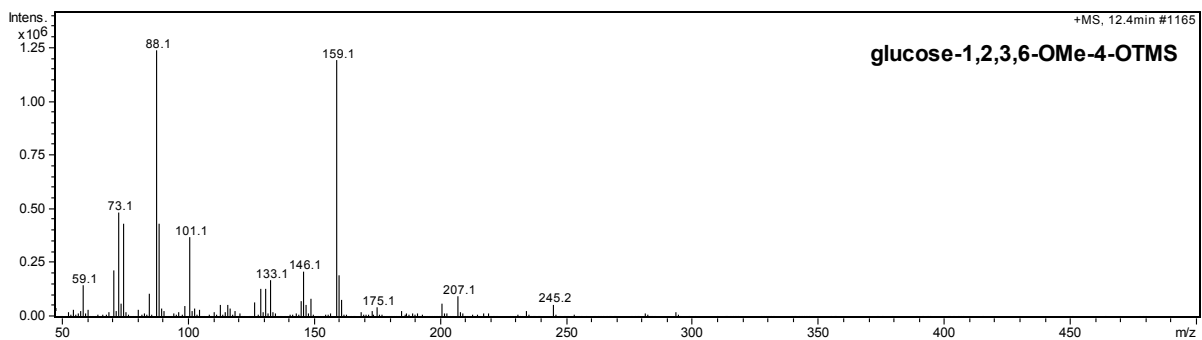

**Figure S15.** EI-MS spectra of compound VIII and glucose-1,2,3,6-Ome-4-OTMS derived from cellulose

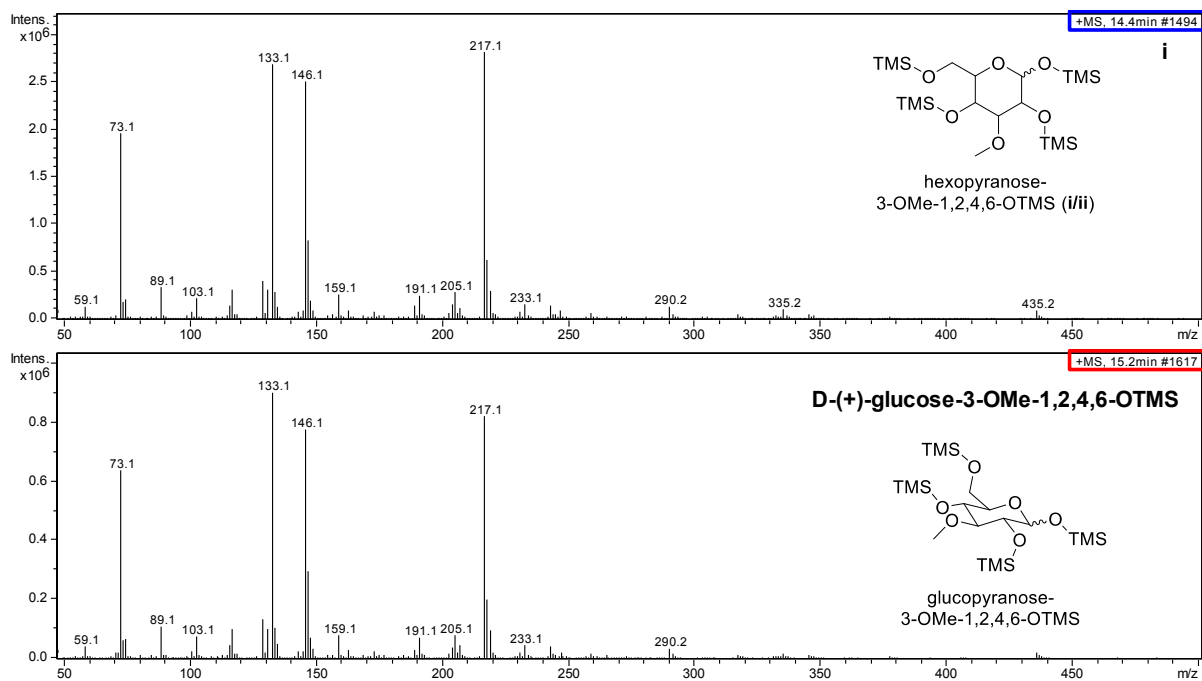

**Figure S16.** EI-MS spectra of compound i and standard D-(+)-glucose-3-OMe-1,2,4,6-OTMS



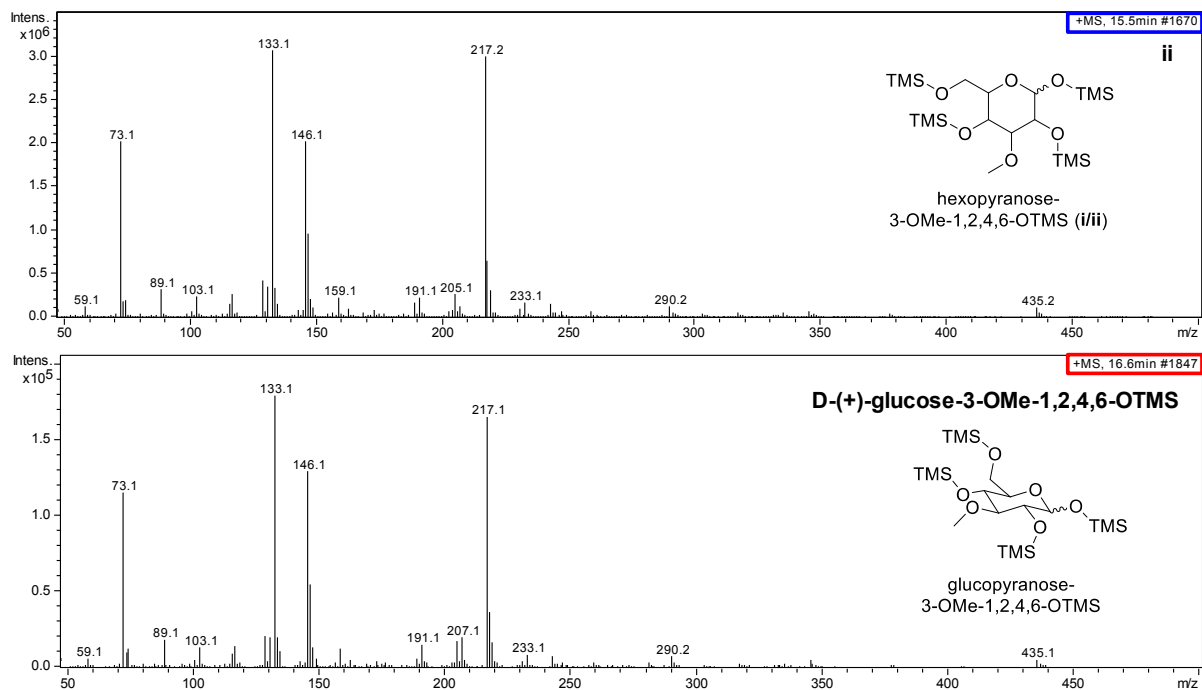

**Figure S17.** EI-MS spectra of compound ii and standard D-(+)-glucose-3-OMe-1,2,4,6-OTMS

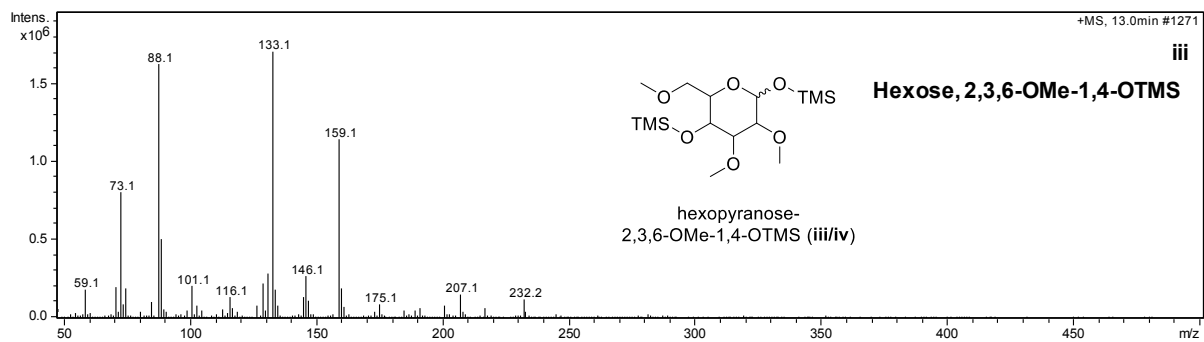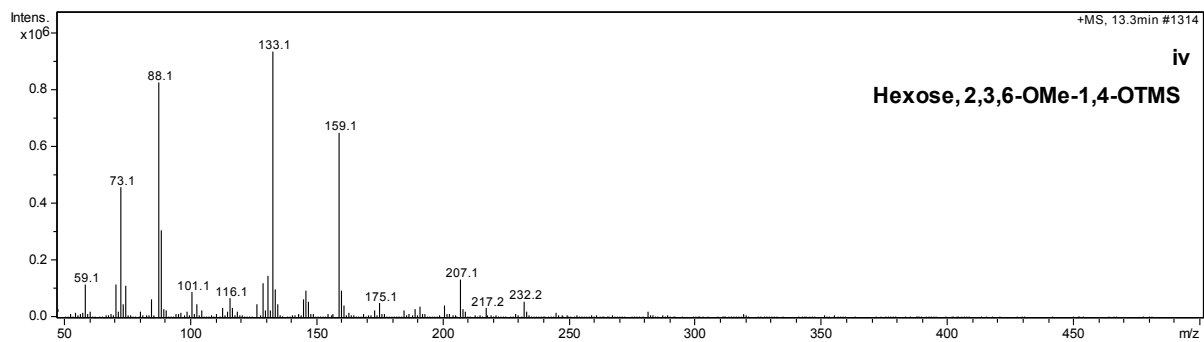

**Figure S18.** EIMS spectra of compounds iii and iv

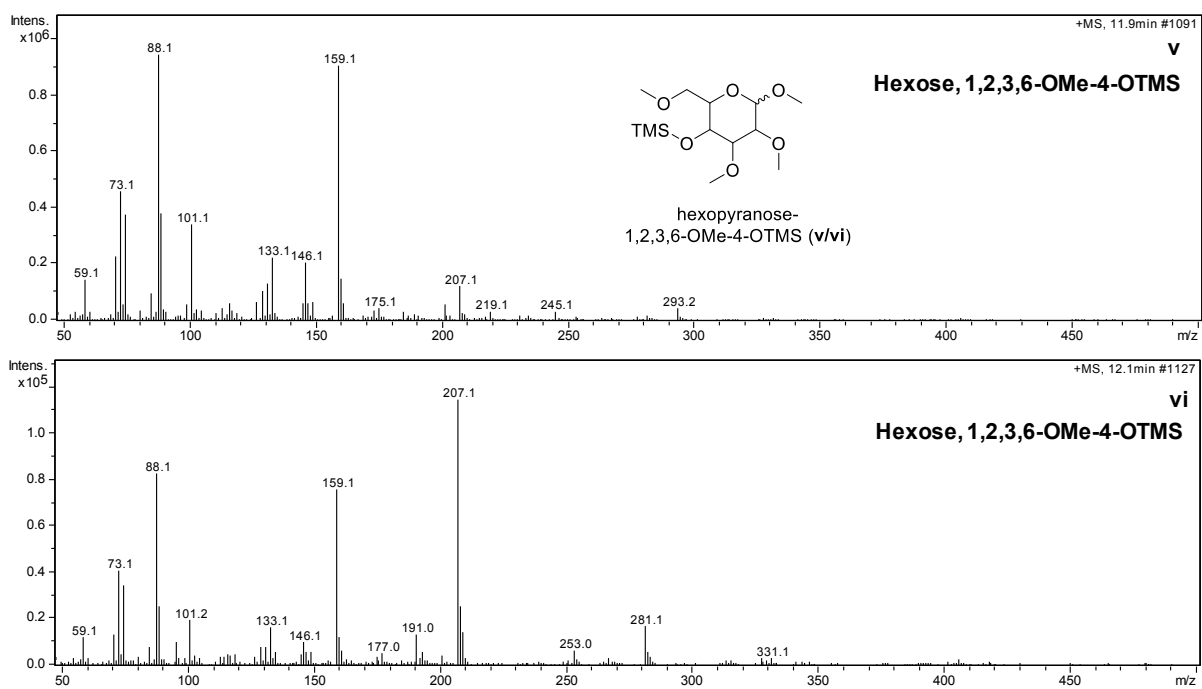

**Figure S19.** EI-MS spectra of compounds v and vi

## Structure elucidation of MMFT-7/8-H<sub>2</sub> by NMR

Purified MMFT-7/8-H<sub>2</sub> mixture was firstly suspended into D<sub>2</sub>O: ND<sub>4</sub>OD (v/v 10:1; ND<sub>4</sub>OD is 25 wt. % in D<sub>2</sub>O) to improve solubility. The standard 1D NMR (<sup>1</sup>H NMR and <sup>13</sup>C NMR) and 2D NMR spectra (COSY, HSQC, HMBC and NOESY) were recorded on a Bruker 600 MHz spectrometer equipped with cryo probe (Figures S20 – S27, Table S1 and S2). By detailed comparison with the reported NMR data of AHDP and PMFT (Ayikpoe & Latham, 2019), the five-membered lactam moiety was deduced by the observation of two non-equivalent methyl groups ( $\delta_{\text{H-6}}$  1.06 ppm/ $\delta_{\text{C-6}}$  21.44 ppm;  $\delta_{\text{H-7}}$  1.25 ppm/ $\delta_{\text{C-7}}$  20.30 ppm), an isolated methine group connected with hydroxyl group ( $\delta_{\text{H-3}}$  4.28 ppm/ $\delta_{\text{C-3}}$  76.16 ppm) and proton within a substituted lactam ( $\delta_{\text{H-1}}$  3.50 ppm/ $\delta_{\text{C-1}}$  63.03 ppm). The assignment of the lactam moiety was completed based on HMBC correlations of H-3 to C-4 ( $\delta_{\text{C}}$  178.09 ppm) and C-2 ( $\delta_{\text{C}}$  42.43 ppm) and C-6, H-1 to C-2 and C-6. Furthermore, the HMBC correlation of H<sub>3</sub>-7 to C-1, C-2, C-3, C-6 and H<sub>3</sub>-6 to C-1, C-2, C-3, C-7 confirmed the five-membered lactam moiety, biosynthetically derived from cyclization of valine and tyrosine. The complete tyrosine moiety was deduced by the observation of one methylene moiety ( $\delta_{\text{H2-5}}$  3.01 ppm, 2.61 ppm/ $\delta_{\text{C-5}}$  36.21 ppm) and two sets of *para*-substituted aromatic protons ( $\delta_{\text{H-9}}$  7.25 ppm/ $\delta_{\text{C-9}}$  130.63 ppm;  $\delta_{\text{H-10}}$  7.12 ppm/ $\delta_{\text{C-9}}$  116.71 ppm). The tyrosine moiety was assigned based on the COSY correlations of H-1 to H<sub>2</sub>-5 as well as H-9 to H-10, and further confirmed by the HMBC correlations of H<sub>2</sub>-5 to C-1 and C-9, H-9 to C-5 and C-11 ( $\delta_{\text{C}}$  155.40 ppm), H-10 to C-8 ( $\delta_{\text{C}}$  133.90 ppm) and C-11. So far, the core planar structure of mycofactocin in its reduced form was assigned unambiguously.

The attached sugar moieties were deduced by the observation of overlapping oxymethine and oxymethylene moieties ( $\delta_{\text{H}}$  3.3 – 4.0 ppm/ $\delta_{\text{C}}$  59.87 – 82.50 ppm). The first anomeric carbon C-1' ( $\delta_{\text{H-1'}}$  5.16 ppm/ $\delta_{\text{C-1'}}$  100.12 ppm) was assigned based on the HMBC correlation of H-1' to C-11. The second anomeric carbon C-1'' ( $\delta_{\text{H-1''}}$  4.63 ppm/ $\delta_{\text{C-1''}}$  102.35 ppm) was assigned by the COSY correlation of H-1'' to H-2'' ( $\delta_{\text{H-2''}}$  3.15 ppm/ $\delta_{\text{C-2''}}$  82.50 ppm), and HMBC correlation of H-1'' to C-2'', whose attached hydroxyl group supposed to be methylated ( $\delta_{\text{H-7''}}$  3.64 ppm/ $\delta_{\text{C-7''}}$  60.55 ppm). This hypothesis was confirmed by the HMBC correlation of H-7'' to C-2''. The anomeric carbon C-1''' ( $\delta_{\text{H-1'''}}$  4.56 ppm/ $\delta_{\text{C-1'''}}$  102.35 ppm) representing the rest of repeated glucose units was assigned by the obviously high integration value compared with H-1' and H-1''. The COSY correlations of H-1''' to H-2''', H-2''' to H-3''', H-5''' to H-6''', and the HMBC correlations of H-2''' to C-1'''/C-3''', H-3''' to C-4''', H-4''' to C-3'''/C-5''', H-5''' to C-3'''/C-4''' and H-6''' to C-4''' allowed to assigned the glucose units. The glycosidic linkage was deduced by the HMBC correlation of H-1'' to C-4' and H-1''' to C-4''. The configuration of the glucose moiety was deduced as  $\beta$ -form by the large coupling constant of anomeric protons ( $J_{\text{H-1'-H-2'}} = 8.0$  Hz;  $J_{\text{H-1''-H-2''}} = 8.0$  Hz;  $J_{\text{H-1'''-H-2'''}} = 8.0$  Hz). With above observations, the attached sugar moieties were assigned as  $\beta$ -1,4 glucose, with the second glucose is 2-oxymethyl-glucose. The planar structure and key HMBC correlations were presented in Figure S27.

The trace amount of oxidized form of MMFT-7/8 was recognized by the observation of *para*-substituted aromatic protons at  $\delta_{\text{H}}$  7.34 ppm (d, 8.31 Hz)/ $\delta_{\text{C}}$  130.62 ppm,  $\delta_{\text{H}}$  7.14 ppm (d, 8.00 Hz)/ $\delta_{\text{C}}$  116.74 ppm, one anomeric carbon ( $\delta_{\text{H}}$  4.53 ppm/ $\delta_{\text{C}}$  102.40 ppm) from the glucose unit, one oxymethylene carbon  $\delta_{\text{H}}$  3.94 ppm, 3.75 ppm/ $\delta_{\text{C}}$  60.88 ppm from the glucose unit, and two non-equivalent methyl groups ( $\delta_{\text{H}}$  0.96 ppm;  $\delta_{\text{H}}$  1.13 ppm).

**Table S1.** NMR data (D<sub>2</sub>O/ND<sub>4</sub>OD 10:1, at 300 K) of MMFT-7/8-H<sub>2</sub><sup>a</sup>

| MMFT-7/8-H <sub>2</sub> |                                 |                                      |                                       |                                                                          |                                                                              |
|-------------------------|---------------------------------|--------------------------------------|---------------------------------------|--------------------------------------------------------------------------|------------------------------------------------------------------------------|
| position                | $\delta_C$ , mult. <sup>b</sup> | $\delta_H$ , mult. ( <i>J</i> in Hz) | COSY                                  | HMBC                                                                     | NOESY                                                                        |
| 1                       | 63.03, CH                       | 3.50, dd (10.93, 3.74)               | 5b                                    | 2, 6                                                                     | 5a, 7                                                                        |
| 2                       | 42.43, qC                       |                                      |                                       |                                                                          |                                                                              |
| 3                       | 76.16, CH                       | 4.28, s                              |                                       | 2, 4, 6                                                                  | 6                                                                            |
| 4                       | 178.09, qC                      |                                      |                                       |                                                                          |                                                                              |
| 5                       | 36.21, CH <sub>2</sub>          | 3.01, dd (12.57, 3.29)               |                                       | 9                                                                        | 1, 5b, 7, 9                                                                  |
|                         |                                 | 2.61, t (12.57)                      | 1                                     | 1, 9                                                                     | 5a, 7, 9                                                                     |
| 6                       | 21.44, CH <sub>3</sub>          | 1.06, s                              |                                       | 1, 2, 3, 7                                                               | 1, 3                                                                         |
| 7                       | 20.30, CH <sub>3</sub>          | 1.25, s                              |                                       | 1, 2, 3, 6                                                               | 5a, 5b                                                                       |
| 8                       | 133.90, qC                      |                                      |                                       |                                                                          |                                                                              |
| 9                       | 130.63, CH                      | 7.25, d (8.48)                       | 10                                    | 5, 11                                                                    |                                                                              |
| 10                      | 116.71, CH                      | 7.12, d (8.48)                       | 9                                     | 8, 11                                                                    |                                                                              |
| 11                      | 155.40, qC                      |                                      |                                       |                                                                          |                                                                              |
| 1 <sup>c</sup>          | 100.12, CH                      | 5.16, d (8.00)                       | 2 <sup>c</sup>                        | 11                                                                       | 10, 6 <sup>c</sup> a                                                         |
| 2 <sup>c</sup>          | 72.66, CH                       | 3.63, t,                             | 1 <sup>cc</sup>                       |                                                                          |                                                                              |
| 3 <sup>d</sup>          | 73.97, CH                       | 3.68, m                              |                                       |                                                                          |                                                                              |
| 4 <sup>d</sup>          | 78.27, CH                       | 3.70, m                              |                                       |                                                                          |                                                                              |
| 5 <sup>c</sup>          | 74.78, CH                       | 3.65, m                              |                                       |                                                                          |                                                                              |
| 6 <sup>c</sup>          | 59.87, CH <sub>2</sub>          | 4.00, d (11.25)                      |                                       |                                                                          | 10                                                                           |
|                         |                                 | 3.84, dd (12.48, 5.46)               |                                       |                                                                          |                                                                              |
| 1 <sup>cc</sup>         | 102.35, CH                      | 4.63, d (8.00)                       | 2 <sup>cc</sup>                       | 4 <sup>c</sup>                                                           | 4 <sup>c</sup>                                                               |
| 2 <sup>cc</sup>         | 82.50, CH                       | 3.15, t (8.38)                       | 1 <sup>cc</sup> , 3 <sup>cc</sup>     | 3 <sup>cc</sup>                                                          | 3 <sup>cc</sup>                                                              |
| 3 <sup>cd</sup>         | 73.97, CH                       | 3.71, m                              | 2 <sup>cc</sup>                       | 2 <sup>cc</sup>                                                          |                                                                              |
| 4 <sup>cd</sup>         | 78.27, CH                       | 3.70, m                              |                                       | 1 <sup>ccc</sup>                                                         |                                                                              |
| 5 <sup>cc</sup>         | 74.78, CH                       | 3.65, m                              |                                       |                                                                          |                                                                              |
| 6 <sup>cc</sup>         | 59.87, CH <sub>2</sub>          | 4.00, d (11.25)                      |                                       |                                                                          |                                                                              |
|                         |                                 | 3.84, dd (12.48, 5.46)               |                                       |                                                                          |                                                                              |
| 7 <sup>cc</sup>         | 60.55, CH <sub>3</sub>          | 3.64, s                              |                                       | 2 <sup>cc</sup>                                                          |                                                                              |
| 1 <sup>ccc</sup>        | 102.35, CH                      | 4.56, d (8.00)                       | 2 <sup>ccc</sup>                      | 4 <sup>cc</sup>                                                          | 2 <sup>ccc</sup> , 3 <sup>ccc</sup> , 4 <sup>cc</sup> , 6 <sup>ccc</sup> a/b |
| 2 <sup>ccc</sup>        | 72.91, CH                       | 3.37, t (8.34)                       | 1 <sup>ccc</sup> , 3 <sup>ccc</sup>   | 1 <sup>ccc</sup> , 3 <sup>ccc</sup>                                      | 1 <sup>ccc</sup> , 3 <sup>ccc</sup>                                          |
| 3 <sup>ccc</sup>        | 73.97, CH                       | 3.68, m                              | 2 <sup>ccc</sup>                      | 4 <sup>ccc</sup>                                                         |                                                                              |
| 4 <sup>ccc</sup>        | 78.27, CH                       | 3.70, m                              |                                       | 1 <sup>cc</sup> , 3 <sup>ccc</sup> , 5 <sup>ccc</sup> , 6 <sup>ccc</sup> |                                                                              |
| 5 <sup>ccc</sup>        | 74.78, CH                       | 3.65, m                              | 6 <sup>ccc</sup> a                    | 3 <sup>ccc</sup> , 4 <sup>ccc</sup>                                      |                                                                              |
| 6 <sup>ccc</sup>        | 59.87, CH <sub>2</sub>          | 4.00, d (11.25)                      | 5 <sup>ccc</sup> , 6 <sup>ccc</sup> b | 4 <sup>ccc</sup>                                                         | 1 <sup>ccc</sup> , 6 <sup>ccc</sup> b                                        |
|                         |                                 | 3.84, dd (12.48, 5.46)               | 6 <sup>ccc</sup> a                    | 4 <sup>ccc</sup>                                                         |                                                                              |

<sup>a</sup> 600 MHz for <sup>1</sup>H NMR and 150 MHz for <sup>13</sup>C NMR

<sup>b</sup> numbers of attached protons were determined by analysis of 2D spectra.

<sup>c</sup> NMR resonance are overlapped by sugar chains and only one unit was presented.

<sup>d</sup> overlapping signals with repeat unit

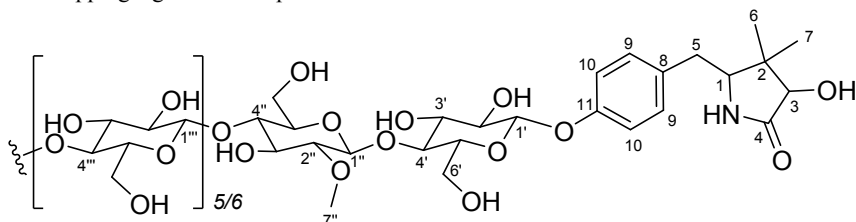

MMFT-7/8-H<sub>2</sub>

**Table S2.** Comparative NMR data for peptide moiety of MMFT-7/8-H<sub>2</sub><sup>a</sup> and AHDP<sup>b</sup>

| position | MMFT-7/8-H <sub>2</sub> |                        | AHDP           |                         |
|----------|-------------------------|------------------------|----------------|-------------------------|
|          | δ <sub>C</sub>          | δ <sub>H</sub>         | δ <sub>C</sub> | δ <sub>H</sub>          |
| 1        | 63.03                   | 3.50, dd (10.93, 3.74) | 62.45          | 3.56, dd (10.02, 4.33)  |
| 2        | 42.43                   |                        | 43.07          |                         |
| 3        | 76.16                   | 4.28, s                | 61.64          | 3.30, s                 |
| 4        | 178.09                  |                        | 177.33         |                         |
| 5        | 36.21                   | 3.01, dd (12.57, 3.29) | 33.29          | 2.79, dd (14.18, 4.36)  |
|          |                         | 2.61, t (12.57)        |                | 2.49, dd (14.17, 10.04) |
| 6        | 21.44                   | 1.06, s                | 22.47          | 0.82, s                 |
| 7        | 20.30                   | 1.25, s                | 14.10          | 1.03, s                 |
| 8        | 133.90                  |                        | 130.33         |                         |
| 9        | 130.63                  | 7.25, d (8.48)         | 130.20         | 7.14, d (8.52)          |
| 10       | 116.71                  | 7.12, d (8.48)         | 115.51         | 6.79, d (8.54)          |
| 11       | 155.40                  |                        | 154.12         |                         |

<sup>a</sup> 600 MHz for <sup>1</sup>H NMR and 150 MHz for <sup>13</sup>C NMR, D<sub>2</sub>O/ND<sub>4</sub>OD (25% w/v in D<sub>2</sub>O) 10:1

<sup>a</sup> 500 MHz for <sup>1</sup>H NMR and 125 MHz for <sup>13</sup>C NMR, D<sub>2</sub>O (pL 7.5)

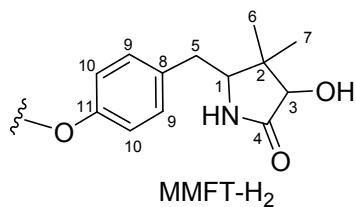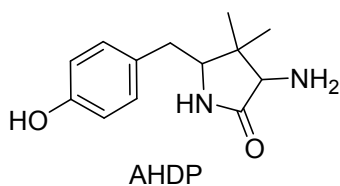

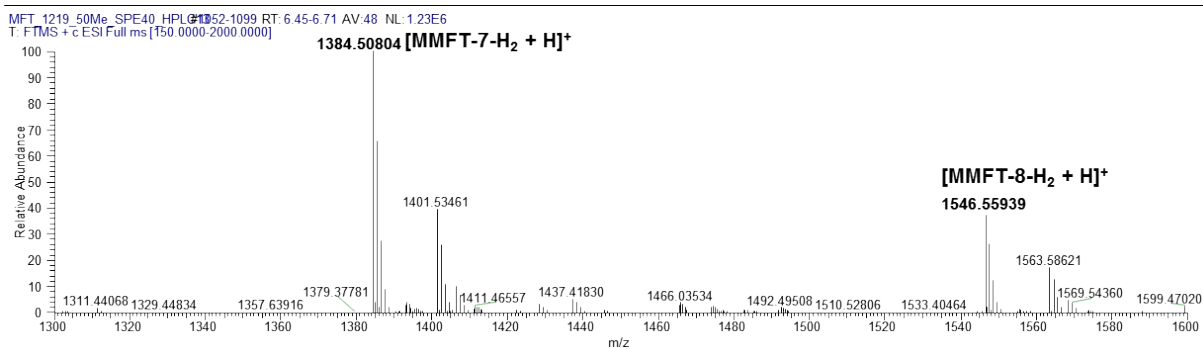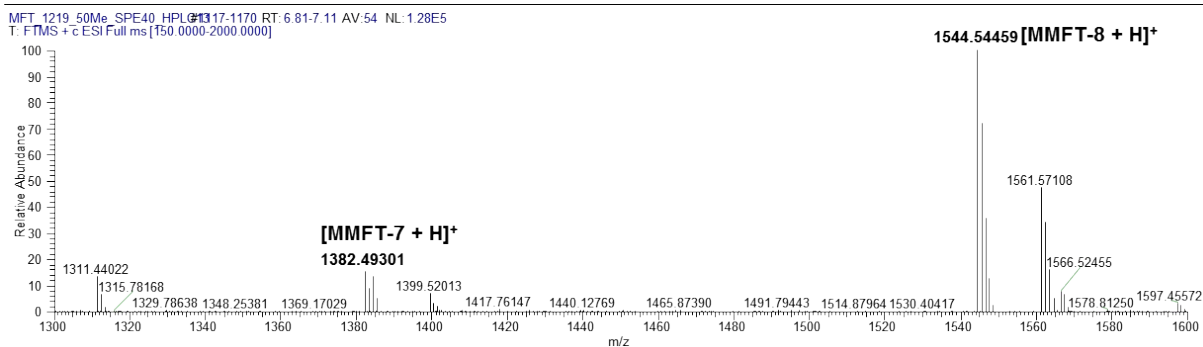

Figure S20. ESI-HRMS spectrum of MMFT-7/8-H<sub>2</sub> fraction

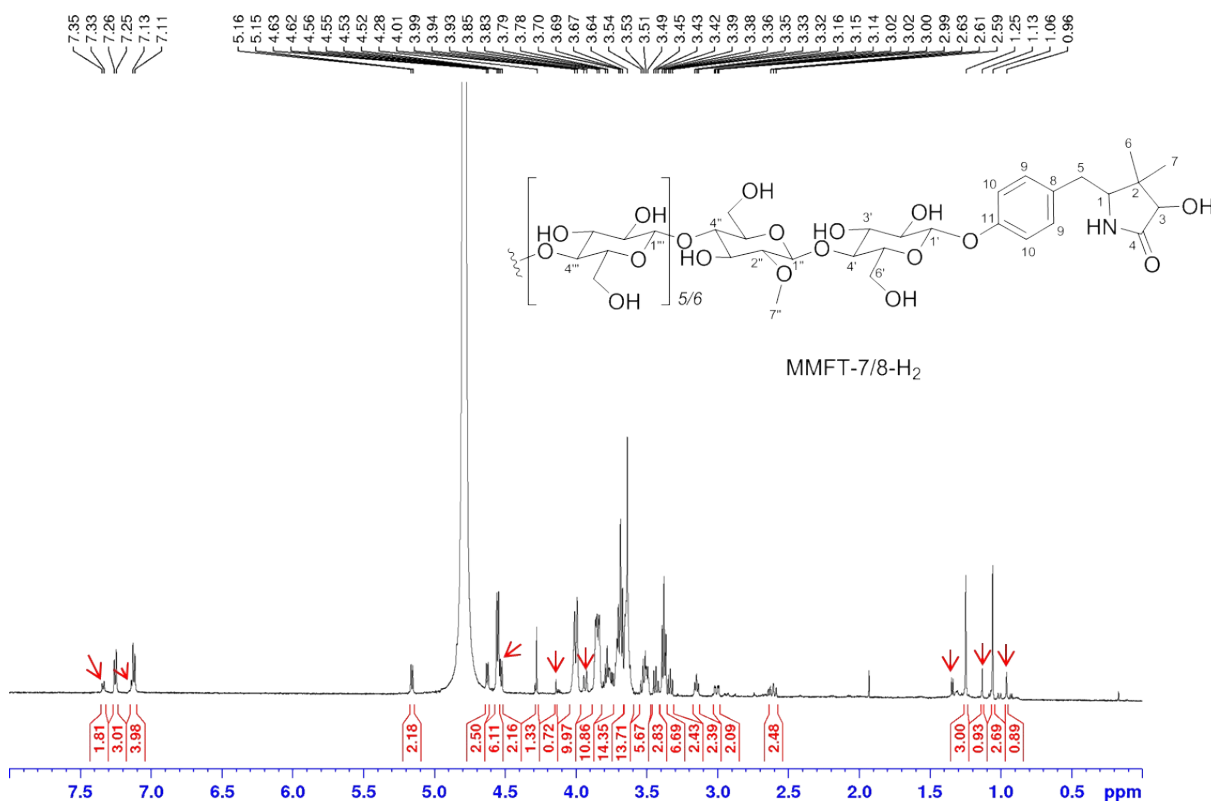

Figure S21. <sup>1</sup>H NMR spectrum of MMFT-7/8-H<sub>2</sub> (D<sub>2</sub>O:ND<sub>4</sub>OD (25% w/v in D<sub>2</sub>O) 10:1, 600 MHz, 300 K), (Red arrow indicates the proposed MMFT-7/8)

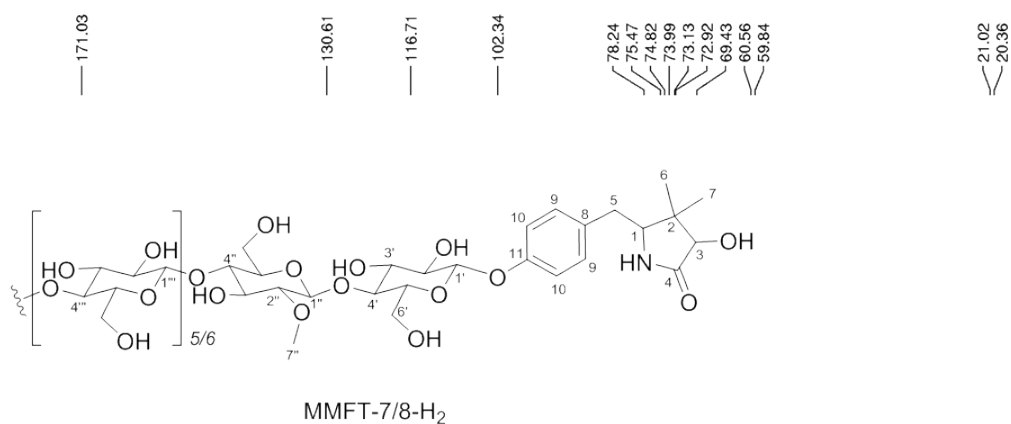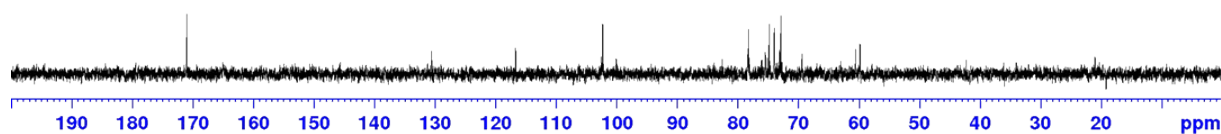

**Figure S22.** <sup>13</sup>C NMR spectrum of MMFT-7/8-H<sub>2</sub> (D<sub>2</sub>O:ND<sub>4</sub>OD (25% w/v in D<sub>2</sub>O) 10:1 , 150 MHz, 300 K)

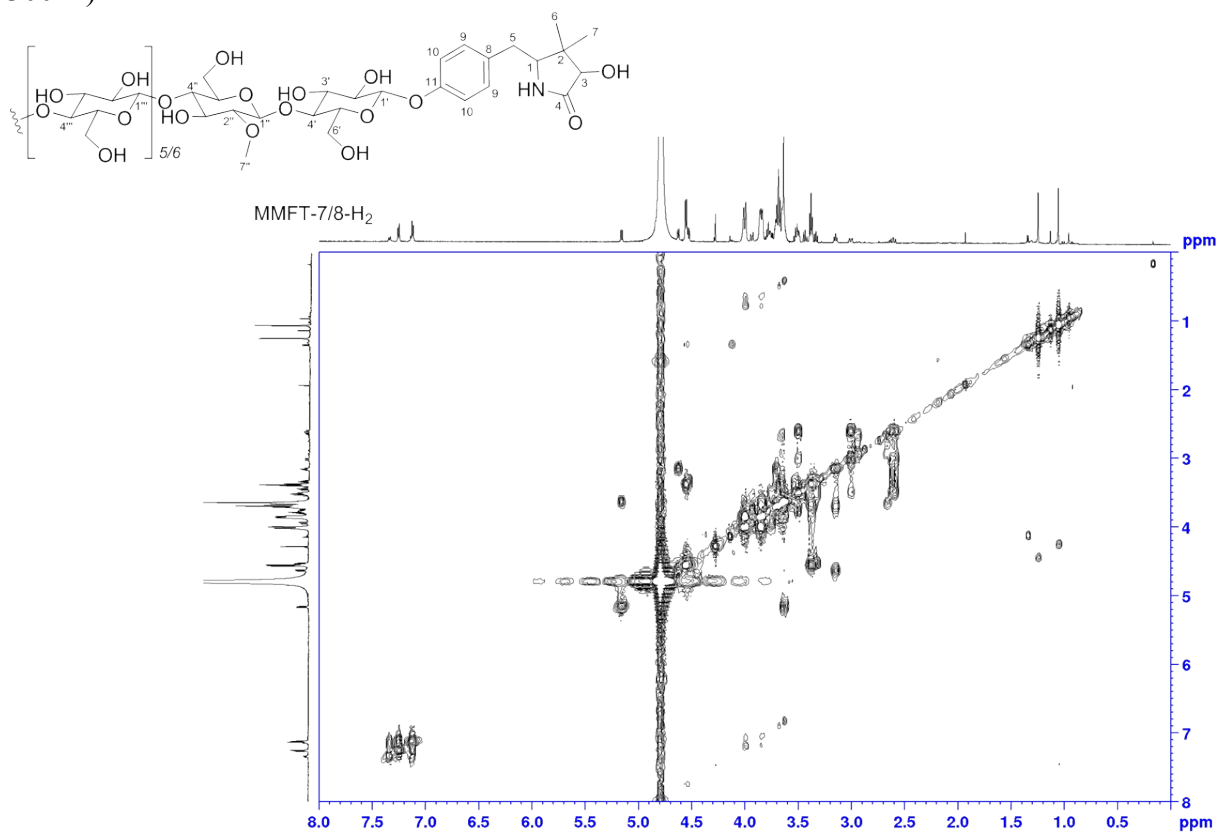

**Figure S23.** <sup>1</sup>H-<sup>1</sup>H COSY spectrum of MMFT-7/8-H<sub>2</sub> (D<sub>2</sub>O:ND<sub>4</sub>OD (25% w/v in D<sub>2</sub>O) 10:1 , 600 MHz, 300 K)





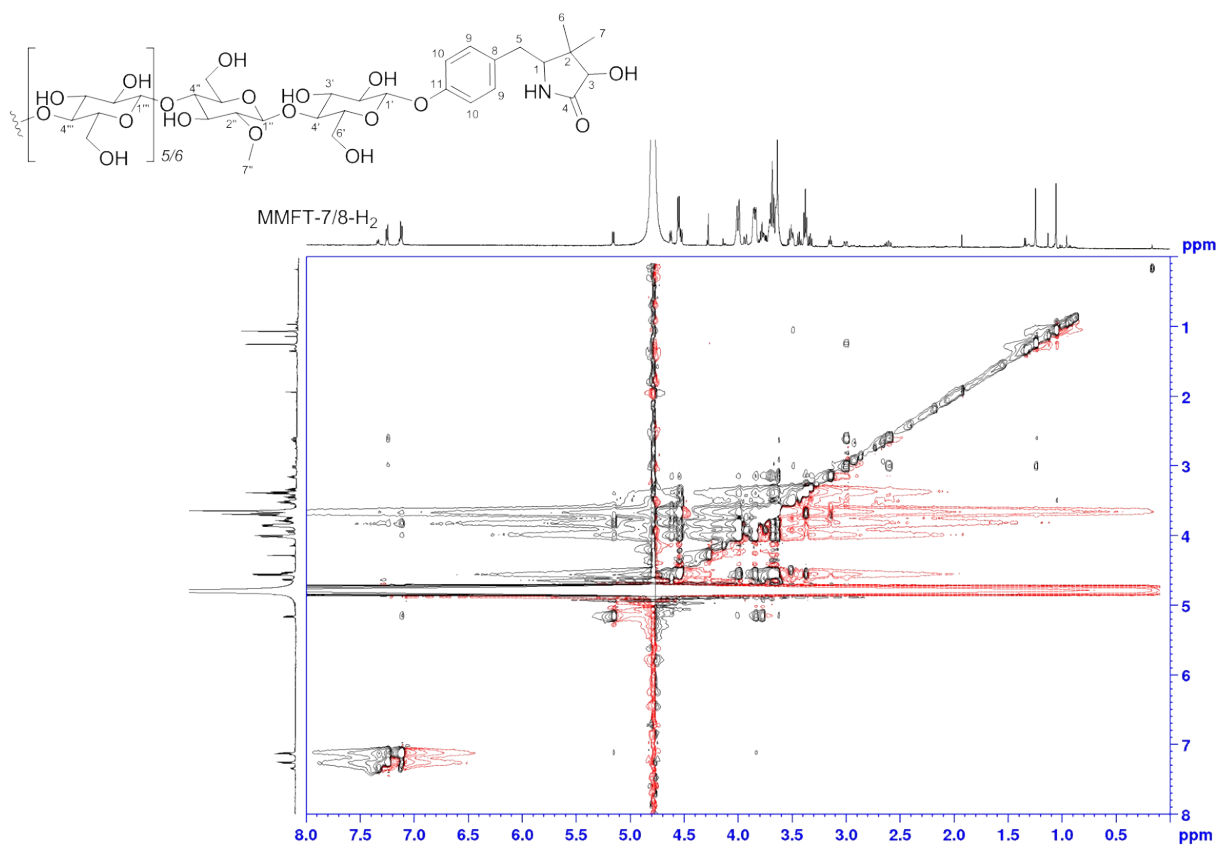

**Figure S26.** NOESY spectrum of MMFT-7/8-H<sub>2</sub> (D<sub>2</sub>O:ND<sub>4</sub>OD (25% w/v in D<sub>2</sub>O) 10:1, 600 MHz, 300 K)

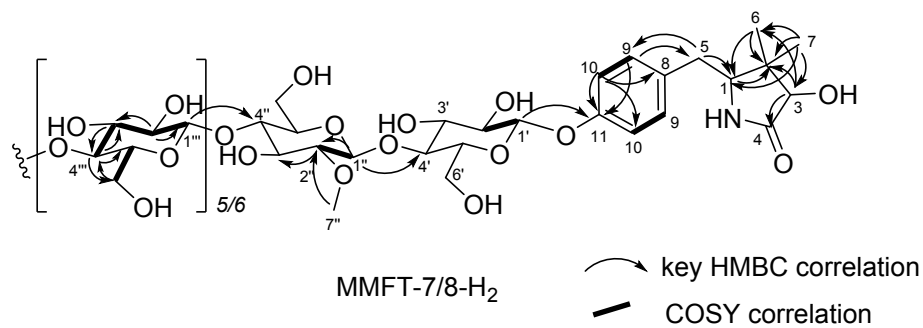

**Figure S27.** HMBC correlations and COSY correlations of MMFT-7/H<sub>2</sub>.

## Additional results

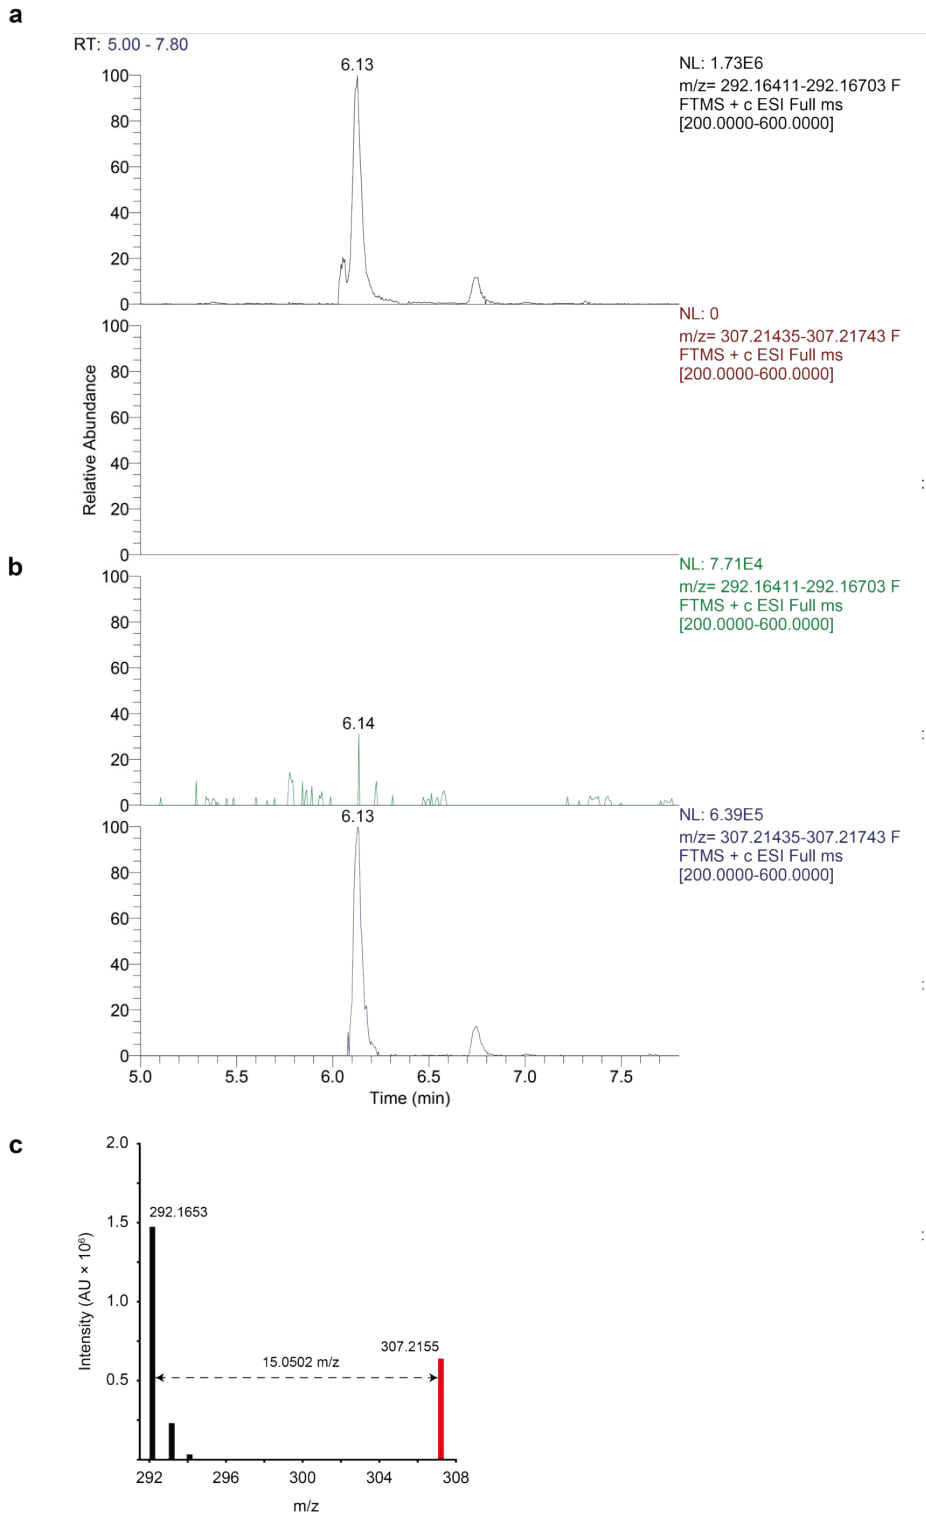

### Figure S28. Stable isotope labeling of GAHDP.

Extracted ion chromatograms of unlabeled ( $m/z$  292.16557  $[M+H]^+$ ) and labeled ( $m/z$  307.21589  $[M+H]^+$ ) GAHDP from *a* *M. smegmatis* fed with unlabeled Gly, Val, and Tyr. *b* *M. smegmatis* fed with  $^{13}\text{C}$ -labeled Gly- $^{13}\text{C}_2$ , Val- $^{13}\text{C}_5$ , and Tyr- $^{13}\text{C}_9$ . *c* Overlaid mass spectra of unlabeled (black) and labeled GAHDP (red). Labeled GAHDP ( $\text{C}_{15}\text{H}_{21}\text{N}_3\text{O}_3$ ) showed a mass shift of +15.05033 Da indicating the incorporation of all three labeled amino acids.

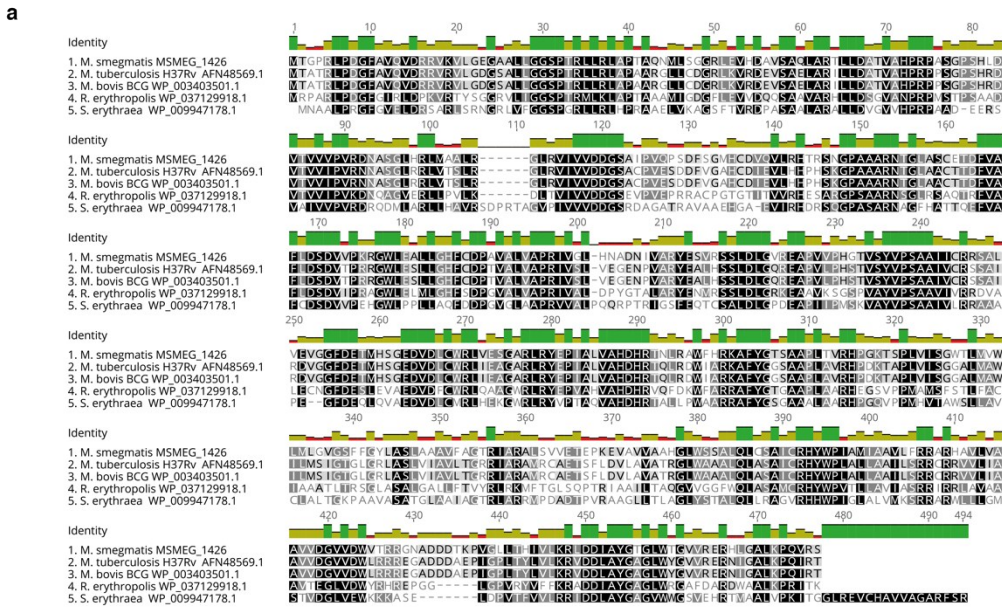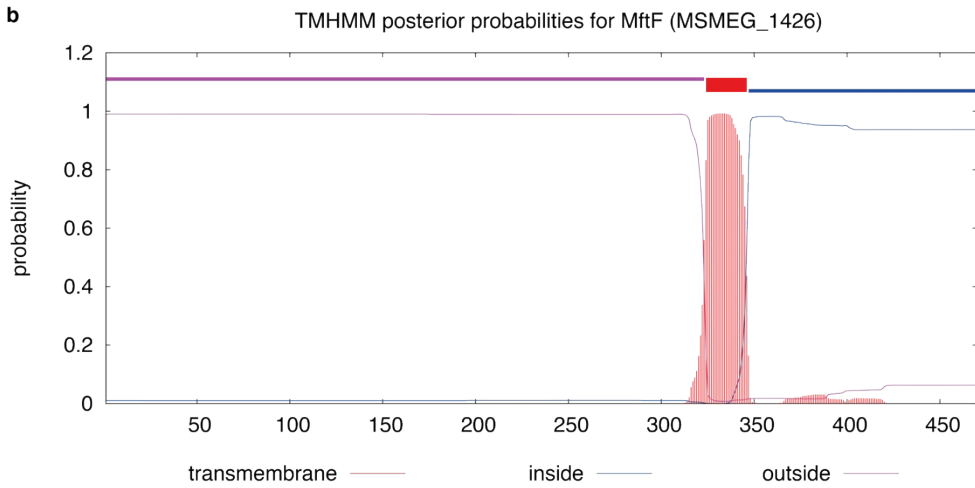

**Figure S29. Bioinformatics analyses of the MftF protein (MSMEG\_1426).**

**a** Sequence alignment (MUSCLE algorithm) of MftF homologues. Source organisms: *Mycolicibacterium smegmatis* MC<sup>2</sup> 155, *Mycobacterium tuberculosis* H37Rv, *Mycobacterium bovis* BCG BCG Pasteur 1173P2, *Rhodococcus erythropolis* SK121, *Saccharopolyspora erythraea* NRRL2338. Protein accession numbers are indicated together with sequence names. **b** Transmembrane helix prediction (TMHMM) of MSMEG\_1426 revealed a membrane helix spanning residues 24 – 46.

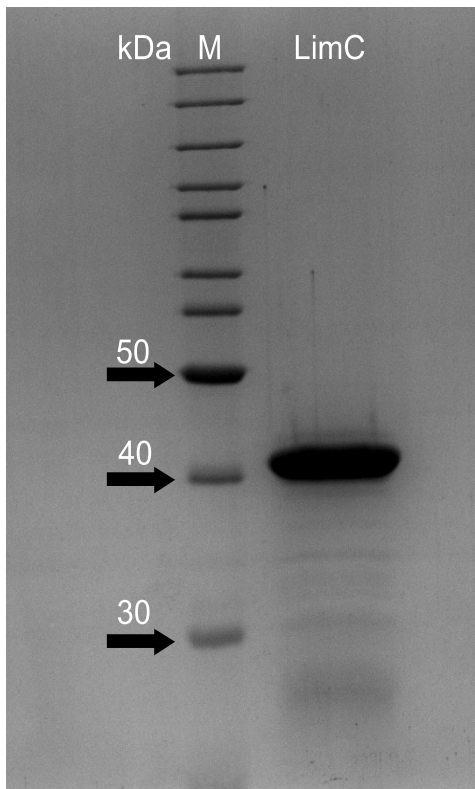

**Figure S30. SDS-PAGE of recombinant carveol dehydrogenase LimC from *Rhodococcus erythropolis* DCL14.** The hexahistidine-tagged protein (His6-LimC, 33 kDa) was produced in *E. coli* BL21 (DE3) / pLAP004 (Figure S31) and purified by immobilized metal-affinity chromatography using a nickel-nitrilacetic acid resin. The protein elutes at around 40 kDa due to reduced gel mobility. M = molecular weight marker (PageRuler, Thermo Fisher).

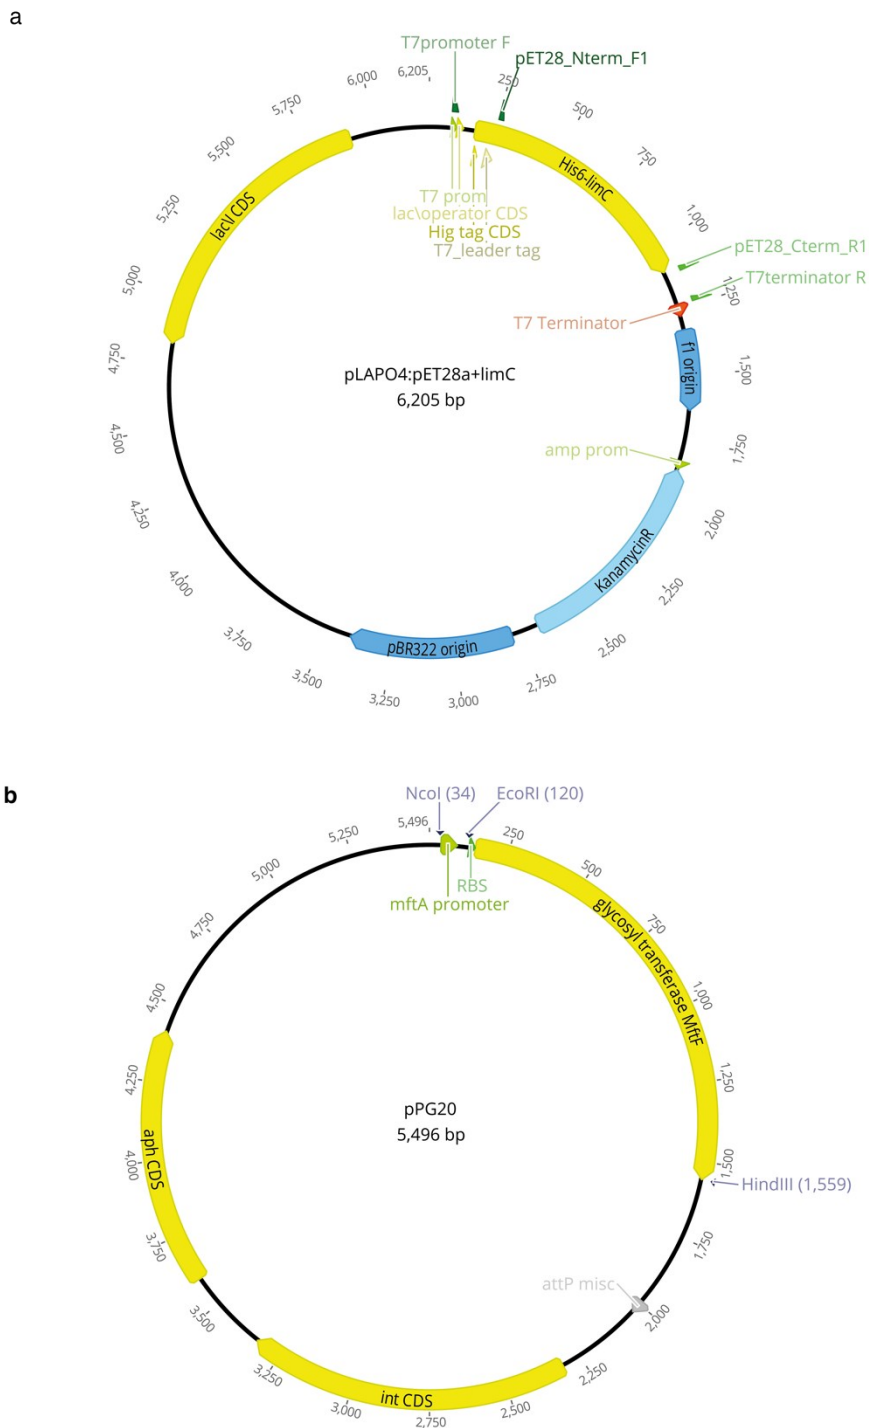

**Figure S31. Maps of plasmids used in this study.**

**a** Plasmid pLAPO04 used for heterologous expression of *limC* in *E. coli* BL21 (DE3): Vector pET28a bearing the coding sequence (CDS) of *limC* from *Rhodococcus erythropolis* DCL14 fused to the N-terminal His-tag region. **b** Plasmid pPG20 used for complementation of the *mftF* gene ( $\Delta mftF$ -Comp) in *M. smegmatis*: Integrative vector pMCPAINT carries the promoter region and ribosome binding site (RBS) of *mftA* fused to the natural CDS of *mftF* for homologous expression in *M. smegmatis*. Promotor and RBS are separated by an additional *EcoRI* site. The whole insert was obtained as a synthetic construct flanked by *NcoI* and *HindIII* sites. Plasmid sequences are shown in Section 3.

## Plasmid Sequences

>pLAPO4:pET28a+limC

GCGCCAGCAACCCGCACCTGTGGCGCCGGTGATGCCGCCACGATGCGTCCGGCGTAGAGGATCGAGATCTCGA  
TCCCCGCAAATTAATACGACTCACTATAGGGGAATTGTGAGCGGATAACAATCCCCTCTAGAAATAATTTTGT  
TAACTTTAAGAAGGAGATATACCATGGGCAGCAGCCATCATCATCATCACAGCAGCGGCCTGGTGCCGCGC  
GGCAGCCATATGGCTAGCATGACTGGTGGACAGCAAATGGGTCGCGTCATGGCACGTGTTGAAGGTCAGGTTG  
CACTGATTACCGGTGCAGCACGTGGTCAGGGTCGTAGCCATGCAATTAAGTGGCCGAAGAGGGTGCAGATGT  
TATTCTGGTTGATGTTCCGAATGATGTGGTGGATATTGGTTATCCGCTGGGCACCGCAGATGAACTGGATCAGA  
CCGCAAAAGATGTTGAAAATCTGGGTCGTAAAGCCATTGTTATTCATGCCGATGTTCTGTATCTGGAAAGCCTG  
ACAGCCGAAGTTGATCGTGCAGTTAGCACCCCTGGTTCGTCTGGATATTGTTAGCGCAAATGCAGGTATTGCAAG  
CGTTCGGTTTCTGAGCCATGATATTCCGGATAATACCTGGCGTCAGATGATTGATATTAATCTGACCGGTGTTTG  
GCATACCGCCAAAGTTGCAGTTCCGCATATTCTGGCAGGCCGAACGTGGTGGTAGCATTGTTCTGACCAGCAGCG  
CAGCAGGTCTGAAAGGTTATGCACAGATTAGCCATTATAGCGCAGCAAAACATGGTGTGTTGGTCTGATGCGT  
AGCCTGGCACTGGAAGTGGCACCCGCATCGTGTTCGTGTTAATAGCCTGCATCCGACACAGGTTAATACCCCGAT  
GATTCAGAATGAAGGCACCTATCGTATTTTTAGTCCGGACCTGGAAAATCCGACACGTGAAGATTTTGAAATTGC  
AAGCACCACCACCAATGCACTGCCGATTCCGTGGGTTGAAAGCGTTGATGTTAGCAATGCCCTGCTGTTTCTGGT  
TAGCGAAGATGCACGTTATATTACAGGTGCCGCAATCCGGTTGATGCAGGTACAACCTGAAATAAGATCCGA  
ATTCGAGCTCCGTCGACAAGCTTGCGGCCGCACTCGAGCACCACCACCACCACCTGAGATCCGGCTGCTAAC  
AAAGCCCCGAAAGGAAGCTGAGTTGGCTGCTGCCACCGCTGAGCAATAACTAGCATAACCCCTTGGGGCCTCTAA  
ACGGGTCTTGAGGGGTTTTTTGCTGAAAGGAGGAACTATATCCGATTGGCGAATGGGACGCGCCCTGTAGCG  
GCGCATTAAAGCGCGGCGGGTGTGGTGGTTACGCGCAGCGTGACCGCTACACTTGCCAGCGCCCTAGCGCCCGC  
TCCTTCGCTTTCTCCCTCCTTTCTCGCCACGTTCCGGCTTTCCCCGTCAGCTCTAAATCGGGGGCTCCCTT  
TAGGGTCCGATTTAGTGCTTTACGGCACCTCGACCCCAAAAACTTGATTAGGGTGATGGTTCACGTAGTGGG  
CCATCGCCCTGATAGACGGTTTTTCGCCCTTGACGTTGGAGTCCACGTTCTTTAATAGTGGACTCTTGTCCAAA  
CTGGAACAACACTCAACCCTATCTCGGTCTATTCTTTGATTTATAAGGGATTTTGCCGATTTCCGGCTATTGGTT  
AAAAAATGAGCTGATTTAACAAAAATTTAACGCGAATTTAACAAAAATTAACGTTTACAATTTCAGGTGGCAC  
TTTTCGGGGAAATGTGCGCGGAACCCCTATTTGTTATTTTTCTAAATACATTCAAATATGTATCCGCTCATGAAT  
TAATTTAGAAAACTCATCGAGCATCAAATGAACTGCAATTTATTCATATCAGGATTATCAATACCATATTTT  
TGAAAAAGCCGTTTCTGTAATGAAGGAGAAAACTCACCGAGGCAGTTCATAGGATGGCAAGATCCTGGTATCG  
GTCTGCGATTCCGACTCGTCCAACATCAATACAACCTATTAATTTCCCCTCGTCAAAAAATAAGGTTATCAAGTGAG  
AAATCACCATGAGTGACGACTGAATCCGGTGAGAATGGCAAAAGTTTATGCATTTCTTTCCAGACTTGTTCAACA  
GGCCAGCCATTACGCTCGTCATCAAATCACTCGCATCAACCAACCGTTATTCATTCGTGATTGCGCCTGAGCG  
AGACGAAATACGCGATCGCTGTTAAAAGGACAATTACAAACAGGAATCGAATGCAACCGGCGCAGGAACACTG  
CCAGCGCATCAACAATATTTTACCTGAATCAGGATATTCTTCTAATACCTGGAATGCTGTTTTCCCGGGGATCGC  
AGTGGTGAGTAACCATGCATCATCAGGAGTACGATAAAATGCTTGATGGTTCGGAAGAGGCATAAATCCGTC  
AGCCAGTTTAGTCTGACCATCTCATCTGTAACATCATTGGCAACGCTACCTTTGCCATGTTTCAGAAACAACCTCG  
GCGCATCGGGCTTCCATAACAATCGAT  
AGATTGTCGCACCTGATTGCCGACATTATCGCGAGCCATTTATACCCATATAAATCAGCATCCATGTTGGAATT  
TAATCGCGGCCTAGAGCAAGACGTTTCCCGTTGAATATGGCTCATAACACCCCTTGATTACTGTTTATGTAAGC  
AGACAGTTTTTATTGTTTCATGACCAAAATCCCTAACGTGAGTTTTCGTCCACTGAGCGTCAGACCCCGTAGAAA  
AGATCAAAGGATCTTCTTGAGATCCTTTTTTTCTGCGGTAATCTGCTGCTTGCAAAACAAAAAACACCGCTACC  
AGCGGTGGTTTGTGTTGCCGATCAAGAGCTACCAACTTTTTTCCGAAGGTAAGTGGCTTACAGCAGAGCGCAGA  
TACCAAACTACTGCTTCTAGTGTAGCCGTAGTTAGGCCACCACTTCAAGAACTCTGTAGCACCGCCTACATACCT  
CGCTCTGCTAATCCTGTTACCAGTGGCTGCTGCCAGTGGCGATAAGTCTGTCTTACCGGGTTGGACTCAAGAC  
GATAGTTACCGGATAAGGCGCAGCGGTCCGGCTGAACGGGGGGTTCGTGCACACAGCCCAGCTTGGAGCGAA  
CGACCTACACCGAACTGAGATACCTACAGCGTGAGCTATGAGAAAGCGCCACGCTTCCCGAAGGGAGAAAGGC  
GGACAGGTATCCGGTAAGCGGCAGGGTCGGAACAGGAGAGCGCACGAGGGAGCTTCCAGGGGGAAACGCCT  
GGTATCTTATAGTCTGTGCGGGTTTCGCCACCTCTGACTTGAGCGTCGATTTTTGTGATGCTCGTCAGGGGGGC  
GGAGCCTATGAAAAACGCCAGCAACGCGCCTTTTTACGGTTCCTGGCCTTTTGCTGGCCTTTTGCTCACATGT  
TCTTTCCTGCGTTATCCCCTGATTCTGTGGATAACCGTATTACCGCCTTTGAGTGAGCTGATACCGCTCGCCGCG

CCGAACGACCGAGCGCAGCGAGTCAGTGAGCGAGGAAGCGGAAGAGCGCCTGATGCGGTATTTTCTCCTTACG  
CATCTGTGCGGTATTTACACCCGCATATATGGTGCCTCTCAGTACAATCTGCTCTGATGCCGCATAGTTAAGCCA  
GTATACTCCGCTATCGCTACGTGACTGGGTCATGGCTGCGCCCCGACACCCGCCAACACCCGCTGACGCGCCC  
TGACGGGCTTGTCTGCTCCCGCATCCGCTTACAGACAAGCTGTGACCGTCTCCGGGAGCTGCATGTGTCAGAG  
GTTTTACCGTCATCACCGAAACGCGCGAGGGCAGCTGCGGTAAAGCTCATCAGCGTGGTTCGTGAAGCGATTAC  
AGATGTCTGCTGTTTATCCGCGTCCAGCTCGTTGAGTTTTCTCCAGAAGCGTTAATGTCTGGCTTCTGATAAAGC  
GGGCCATGTTAAGGGCGTTTTTTCTGTTTGGTCACTGATGCCTCCGTGTAAGGGGGATTTCTGTTTCATGGGG  
GTAATGATACCGATGAAACGAGAGAGGATGCTCACGATACGGGTTACTGATGATGAACATGCCCGGTTACTGG  
AACGTTGTGAGGGTAAACAACCTGGCGGTATGGATGCGGCGGGACCAGAGAAAAATCACTCAGGGTCAATGCCA  
GCGCTTCGTTAATACAGATGTAGGTGTTCCACAGGGTAGCCAGCAGCATCCTGCGATGCAGATCCGGAACATAA  
TGGTGCAGGGCGCTGACTTCCGCGTTTTCCAGACTTTACGAAACACGGAAACCGAAGACCATTGTTGTTGCTC  
AGGTGCGCAGACGTTTTGACGACGAGTCGCTTACGTTGCTCGCTATCGGTGATTCACTGCTAACAGTAA  
GGCAACCCCGCCAGCCTAGCCGGTCTCAACGACAGGAGCACGATCATGCGCACCCGTGGGGCCGCCATGCC  
GGCGATAATGGCCTGCTTCTCGCCGAAACGTTTGGTGGCGGGACCAGTGACGAAGGCTTGAGCGAGGGCGTGC  
AAGATTCCGAATACCGCAAGCGACAGGCCGATCATCGTCGCGCTCCAGCGAAAGCGGTCTCGCCGAAAATGAC  
CCAGAGCGCTGCCGGCACCTGTCTACGAGTTGCATGATAAAGAAGACAGTCATAAGTGGGCGACGATAGTC  
ATGCCCCGCGCCACCGGAAGGAGCTGACTGGGTTGAAGGCTCTCAAGGGCATCGGTGAGATCCCGGTGCCT  
AATGAGTGAGCTAACTTACATTAATTGCGTTGCGCTCACTGCCCGCTTCCAGTCGGGAAACCTGTCGTGCCAGC  
TGCATTAATGAATCGGCCAACGCGCGGGGAGAGGGCGTTTTGCGTATTGGGCGCCAGGGTGGTTTTTTCTTTTAC  
CAGTGAGACGGGCAACAGCTGATTGCCCTTACCCGCTGGCCCTGAGAGAGTTGCAGCAAGCGGTCCACGCTG  
GTTTCCCCAGCAGGCGAAAATCCTGTTTGATGGTGGTTAACGGCGGGATATAACATGAGCTGTCTTCGGTATC  
GTCGTATCCACTACCGAGATATCCGCACCAACGCGCAGCCCGGACTCGGTAATGGCGCGCATTGCGCCAGCG  
CCATCTGATCGTTGGCAACCAGCATCGCAGTGGGAACGATGCCCTCATTACGATTTGCATGGTTTGTGAAAAC  
CGGACATGGCACTCCAGTCGCCTTCCCGTTCCGCTATCGGCTGAATTTGATTGCGAGTGAGATATTTATGCCAGC  
CAGCCAGACGCAGACGCGCCGAGACAGAACTAATGGGCCCGCTAACAGCGCGATTTGCTGGTGACCCAATGC  
GACCAGATGCTCCACGCCAGTCGCGTACCGTCTTTCATGGGAGAAAATAATACTGTTGATGGGTGTCTGGTCAG  
AGACATCAAGAAATAACGCCGGAACATTAGTGACAGGCAGCTTCCACAGCAATGGCATCCTGGTCATCCAGCGGA  
TAGTTAATGATCAGCCACTGACGCGTTGCGCGAGAAGATTGTGCACCCCGCTTTACAGGCTTCGACGCCGCTT  
CGTTCTACCATCGACACCACCGCTGGCACCCAGTTGATCGGCGCGAGATTTAATCGCCGCGACAATTTGCGAC  
GGCGCGTGCAGGGCCAGACTGGAGGTGGCAACGCCAATCAGCAACGACTGTTTGGCCGCGAGTTGTTGTGCCA  
CGCGGTTGGGAATGTAATTCAGCTCCGCCATCGCCGCTTCCACTTTTTCCCGCGTTTTTCGAGAAACGTGGCTGG  
CCTGGTTCACCACGCGGGAAACGGTCTGATAAGAGACACCGGCATACTCTGCGACATCGTATAACGTTACTGGT  
TTCACATTCACCACCCTGAATTGACTCTCTTCCGGGCGCTATCATGCCATACCGCGAAAGGTTTTGCGCCATTGCA  
TGGTGTCCGGGATCTCGACGCTCTCCCTTATGCGACTCCTGCATTAGGAAGCAGCCAGTAGTAGGTTGAGGCC  
GTTGAGCACCGCCCGCCGAAGGAATGGTGCATGCAAGGAGATGGCGCCCAACAGTCCCCCGCCACGGGGCCT  
GCCACCATAACCACGCCGAAACAAGCGCTCATGAGCCCGAAGTGGCGAGCCCGATCTTCCCATCGGTGATGTC  
GGCGATATAG



>pPG20

GGCCGCGGTACCAGATCTTTAAATCTAGATATCCATGGCTCTCACACCCCTCTTCCATTCTGGCACTCGATGCCA  
TATATTTGCGATCTCGATCACAACCTGTCGAGACCATACGCGAGAATTCGACCCGGAACGGATTGCTGACATGACC  
GGACCGAGACTGCCCGACGTTTTGCCGTGCAGGTGGATCGCCGAGTCAAGGTGCTCGGAGAGGGCGCGGCG  
TTGCTGGGCGGCTCACCGACCCGCTGCTGCGGTTGGCGCCGACGGCCAGAACATGCTCAGCGGGGGCCGCC  
TCGAGGTTACGACGCGGTGTCCGCGCAACTCGCGCAACCCTCCTGGACGCGACCGTCGCGCATCCGCGGCCT  
GCCAGCGGGCCGTCCCATCTGGACGTCACAGTGGTTGTCCCGTACGGGACAACGCATCCGGCCTGCACCGCCT  
GATGGCGGCGCTGCGCGGGCTGCGCGTGATCGTGGTTCGACGACGGCTCGGCGATCCCGGTGCAACCGTCCGAC  
TTCTCCGGTATGACTGCGACGTGCAGGTGCTGCGGCACACCCGACGCAACGGCCCCGCGGCCGCGCGTAACAC  
CGGCCTTGCGTCGTGCGAGACGGATTCGTGGCGTTCCTCGATTCCGACGTGGTGCCCAAGCGTGGTTGGCTCG  
AGGCGCTGCTCGGGCATTCTGCGATCCGGCCGTGGCACTGGTGGCGCCCCGCATCGTGGGTCTGCACAACGCC  
GACAACATCGTGCCCCGTACGAGTCCGTCCGATCCTCGCTGGACCTCGGGGTGCGCGAGGCGCCCGTGGTGC  
CGCACGGCACGGTGTGATGTGCCGAGCGCGGCGATCATCTGCAGGCGGTGCGCGCTCGTGGAAAGTGGGCG  
GGTTCGACGAGACCATGCACTCGGGGGAGGATGTCGACCTGTGCTGGCGCTGGTTCGAGTTCGGGCGCGGTCT  
GCGTTACGAACCGATCGCCCTGGTGGCGCACGATCACCGACCAACCTGCGAGCGTGGTTCACCGCAAGGCAT  
TCTATGGAACGTGCGCCGCTCCGCTGACGGTGCGCCATCCCGGTAAGACGTCGCCGCTGGTATCTCGGGGTG  
GACGCTGATGGTGTGGCTGATGCTCGGGGTGGGCTCGTTCTTCGGCTACCTCGCCTCGCTCGCGGCGGCGGTGT  
TCGCGGGTACCCGCATCGCGCGGGCGCTCAGCGTGTGCGAGACCGAACCAAGGAGTTCGCGGTGGTTCGCCG  
CCACGGCCTGTGGTGTGTCGGCGTTGCAGTTGTGTTTCGGCGATCTGTGCCACTACTGGCCCATCGCGATGATCG  
CGGCGGTGCTGTTCCGCCGGGCGCGGCACGCGGTGCTGGTGGCCGCGGTGGTGGACGGTGTGGTTCGACTGGG  
TGACGCGACGCGCAACGCCGACGACACCAACCGGTGCGACTGCTCACCCACATCGTGCTCAAGCGACT  
GGACGACATCGCCTACGGCACCGGTCTGTGGACCGGCGTGGTGGCGAGCGTCACCTCGGCGCGCTCAAGCCC  
CAGGTGCGGAGTTAGAAGCTTATCGATGTGACGTAGTTAACTAGCGTACGATCGACTGCCAGGCATCAAATAA  
AACGAAAGGCTCAGTCGAAAGACTGGGCCTTTGTTTTATCTGTTGTTTGTCCGGCCATCATGGCCGCGGTGATC  
AGCTAGAGCCGTGAACGACAGGGCGAACGCCAGCCCGCCGACGGCGAGGGTTCGACCGCTGCAACTCCCGGT  
GCAACCTTGTCCCGTCTATTCTTTCACTGCACCAAGCTCCAATCTGGTGTGAATGCCCTCGTCTGTTTCGCGCAG  
GCGGGGGGCTCTATTGTTTTGTGACATCGAAAGTAGCCAGATCAGGGATGCGTTGCAACCGCGTATGCCAG  
GTCAGAAGAGTGCACAAGAGTTGCAGACCCCTGGAAGAAAAATGGCCAGAGGGCGAAAACACCCCTTGACC  
AGCGGAGCGGGCGACGGGAATCGAACCCGCGTAGCTAGTTTGAAGAATGGGTGTCTGCCGACCACATATATG  
GGCCGGTCAAGATAGGTTTTTACCCCTCTCGGCTGCATCCTCTAAGTGGAAGAAATTGCAGGTGCTAGAAGC  
GCGTTGAAGCCTGAGAGTTGCACAGGAGTTGCAACCCGGTAGCCTTGTTCACGACGAGAGGAGACCTAGTTGG  
CACGTGCGGGATGGGGATCGCTGAAGACTCAGCGCAGCGGGAGGATCCAAGCCTCATACGTCAACCCGCAGGA  
CGGTGTGAGTACTACGCGCTGCAGACCTACGACAACAAGATGGACGCCGAAGCCTGGCTCGCGGGCGAGAA  
GCGGCTCATCGAGATGGAGACCTGGACCCCTCCACAGGACCGGGCGAAGAAGGCAGCCGCCAGCGCCATCACG  
CTGGAGGAGTACACCCGGAAGTGGCTCGTGGAGCGCGACCTCGCAGACGGCACCAAGGATCTGTACAGCGGG  
CACGCGGAGCGCCGCATCTACCCGGTGTAGGTGAAGTGGCGGTACAGAGATGACGCCAGCTCTGGTGGCTG  
CGTGGTGGGCGGGATGGGTAGGAAGCACCCGACTGCCCGCCGGCATGCCTACAACGTCTCCGGGCGGTGAT  
GAACACAGCGGTGAGGACAAGCTGATCGCAGAGAACCCGTGCCGGATCGAGCAGAAGGCAGCCGATGAGCG  
CGACGTAGAGGCGCTGACGCTGAGGAGCTGGACATCGTCGCCGCTGAGATCTTCGAGCACTACCGGATCGCG  
GCATACATCCTGGCGTGGACGAGCCTCCGGTTCGGAGAGCTGATCGAGCTTCGCCGCAAGGACATCGTGGACG  
ACGGCATGACGATGAAGTCCGGGTGCGCCGTGGCGCTTCCCGCGTGGGGAACAAGATCGTCTGTTGGCAACGC  
CAAGACCGTCCGGTCAAGCGTCTGTGACGGTTCGCGCTCACGTGCGGGAGATGATCCGAGCGCACATGAAG  
GACCGTACGAAGATGAACAAGGGCCCCGAGGCATTCTGGTACCACGACGCGAGGGCAACCGGCTGTGCAAGT  
CCGCGTTCACCAAGTGCCTGAAGCGTGGCTACGCCAAGATCGGTGCGCCGGAACCTCCGCATCCACGACCTCCGC  
GCTGTGCGCGCTACGTTCCCGCTCAGGCAGGTGCGACGACCAAGGAGCTGATGGCCCGTCTCGGTACACGA  
CTCCTAGGATGGCGATGAAGTACCAGATGGCGTCTGAGGCCCGCGACGAGGCTATCGCTGAGGCGATGTCAA  
GCTGGCCAAGACCTCTGAAACGCAAAAAGCCCCCTCCAAGGACACTGAGTCTAAAGAGGGGGGTTTCTTG  
TCAGTACGCGAAGAACCACGCCTGGCCGCGAGCGCCAGCACCCGCGTCTGTGCGGAGACCTGGGCACCGACC  
CCGCCGCCGCGAGGAGCATTGCCGTTCCCGCCAGCTAGCAACAAAGCGACGTTGTGTCTCAAATCTCTGATGTT

ACATTGCACAAGATAAAAATATATCATCATGAACAATAAAACTGTCTGCTTACATAAACAGTAATACAAGGGGTG  
TTATGAGCCATATTCAACGGGAAACGTCTTGCTCGAGGCCGCGATTAAATTCCAACATGGATGCTGATTTATATG  
GGTATAAATGGGCTCGCGATAATGTCGGGCAATCAGGTGCGACAATCTATCGCTTGTATGGGAAGCCCCATGCG  
CCAGAGTTGTTTCTGAAACATGGCAAAGGTAGCGTTGCCAATGATGTTACAGATGAGATGGTCAGACTAAACTG  
GCTGACGGAATTTATGCCTCTTCCGACCATCAAGCATTTTATCCGTACTCCTGATGATGCATGGTTACTCACCCT  
GCGATCCCCGGGAAAACAGCATTCCAGGTATTAGAAGAATATCCTGATTCAGGTGAAAATATTGTTGATGCGCT  
GGCAGTGTTCTGCGCCGGTTGCATTGATTCTGTTTGTAAATTGTCCTTTAACAGCGATCGCGTATTTTCGTCTC  
GCTCAGGCGCAATCACGAATGAATAACGGTTTTGGTTGATGCGAGTGATTTTGTATGACGAGCGTAATGGCTGGCC  
TGTTGAACAAGTCTGGAAGAAATGCATAATCTTTTGCATTCTCACCAGATTAGTTCGTCACTCATGGTGATTTT  
TCACTTGATAACCTTATTTTTGACGAGGGGAAATTAATAGGTTGTATTGATGTTGGACGAGTCGGAATCGCAGAC  
CGATACCAGGATCTTGCCATCCTATGGAAGTGCCTCGGTGAGTTTTCTCCTTCATTACAGAAACGGCTTTTTCAA  
AATATGGTATTGATAATCCTGATATGAATAAATTGCAGTTTCATTTGATGCTCGATGAGTTTTTCTAATCAGAATT  
GGTTAATTGGTTGTAACACTGGCAGAGCATTACGCTGACTTGACGGGACGGCGGCTTTGTTGAATAAATCGAAC  
TTTTGCTGAGTTGAAGGATCAGATCACGCATCTTCCCGACAACGCAGACCGTTCCGTGGCAAAGCAAAGTTCA  
AAATCACCAACTGGTCCACCTACAACAAAGCTCTCATCAACCGTGGCTCCCTCACTTTCTGGCTGGATGATGGGG  
CGATTCAGGCCTGGTATGAGTCAGCAACACCTTCTTACGAGGCAGACCTCACTAGTTCCACTGAGCGTCAGACC  
CCGTAGAAAAGATCAAAGGATCTTCTTGAGATCCTTTTTTCTGCGCGTAATCTGCTGCTTGCAAACAAAAAAC  
CACCGCTACCAGCGGTGGTTTGGTTGCCGGATCAAGAGCTACCAACTCTTTTTCCGAAGGTAAGTGGCTTCAGCA  
GAGCGCAGATACCAATACTGTCCTTCTAGTGTAGCCGTAGTTAGGCCACCACTTCAAGAAGTCTGTAGCACCGC  
CTACATACCTCGCTCTGCTAATCCTGTTACCAGTGGCTGCTGCCAGTGGCGATAAGTCGTGTCTTACCGGGTTGG  
ACTCAAGACGATAGTTACCGGATAAGGCGCAGCGGTGCGGCTGAACGGGGGGTTCGTGCACACAGCCCAGCTT  
GGAGCGAACGACCTACACCGAACTGAGATACCTACAGCGTGAGCATTGAGAAAGCGCCACGCTTCCCGAAGGG  
AGAAAGGCGGACAGGTATCCGGTAAGCGGCAGGGTCGGAACAGGAGAGCGCACGAGGGGAGCTTCCAGGGGG  
AAACGCCTGGTATCTTTATAGTCTGTCGGGTTTCGCCACCTCTGACTTGAGCGTTCGATTTTTGTGATGCTCGTCA  
GGGGGGCGGAGCCTATGGAAAACGCCAGCAACGCGGCCTTTTTACGGTTCCTGGCCTTTTGTGCTGGCCTTTTGC  
TCACATGTTCTTCTGCGTTATCCCCTGATTCTGTGGATAACCGTATTACCGCCTTTGAGTGAGCTGATACCGCT  
CGCCGCAGCCGAACGACCGAGCGCAACGCGTGC

## References

- Ayikpoe RS, Latham JA (2019) MftD catalyzes the formation of a biologically active redox center in the biosynthesis of the ribosomally synthesized and post-translationally modified redox cofactor, mycofactocin. *J Am Chem Soc* 141: 13582-13591
- Berney M, Weimar MR, Heikal A, Cook GM (2012) Regulation of proline metabolism in mycobacteria and its role in carbon metabolism under hypoxia. *Mol Microbiol* 84: 664-81
- Chambers MC, Maclean B, Burke R, Amodei D, Ruderman DL, Neumann S, Gatto L, Fischer B, Pratt B, Egertson J, Hoff K, Kessner D, Tasman N, Shulman N, Frewen B, Baker TA, Brusniak MY, Paulse C, Creasy D, Flashner L et al. (2012) A cross-platform toolkit for mass spectrometry and proteomics. *Nat Biotechnol* 30: 918-20
- Edgar RC (2004) MUSCLE: multiple sequence alignment with high accuracy and high throughput. *Nucleic Acids Res* 32: 1792-7
- Krishnamoorthy G, Kaiser P, Lozza L, Hahnke K, Mollenkopf HJ, Kaufmann SHE (2019) Mycofactocin is associated with ethanol metabolism in mycobacteria. *mBio* 10
- Krogh A, Larsson B, von Heijne G, Sonnhammer EL (2001) Predicting transmembrane protein topology with a hidden Markov model: application to complete genomes. *J Mol Biol* 305: 567-80
- Lombard V, Golaconda Ramulu H, Drula E, Coutinho PM, Henrissat B (2014) The carbohydrate-active enzymes database (CAZy) in 2013. *Nucleic Acids Res* 42: D490-5
- Shannon P, Markiel A, Ozier O, Baliga NS, Wang JT, Ramage D, Amin N, Schwikowski B, Ideker T (2003) Cytoscape: a software environment for integrated models of biomolecular interaction networks. *Genome Res* 13: 2498-504
- van der Werf MJ, van der Ven C, Barbirato F, Eppink MH, de Bont JA, van Berkel WJ (1999) Stereoselective carveol dehydrogenase from *Rhodococcus erythropolis* DCL14. A novel nicotinoprotein belonging to the short chain dehydrogenase/reductase superfamily. *J Biol Chem* 274: 26296-304
- Wang M, Carver JJ, Phelan VV, Sanchez LM, Garg N, Peng Y, Nguyen DD, Watrous J, Kapono CA, Luzzatto-Knaan T, Porto C, Bouslimani A, Melnik AV, Meehan MJ, Liu WT, Crusemann M, Boudreau PD, Esquenazi E, Sandoval-Calderon M, Kersten RD et al. (2016) Sharing and community curation of mass spectrometry data with Global Natural Products Social Molecular Networking. *Nat Biotechnol* 34: 828-837
- Warner DF, Ndwandwe DE, Abrahams GL, Kana BD, Machowski EE, Venclovas C, Mizrahi V (2010) Essential roles for *imuA*<sup>1</sup>- and *imuB*-encoded accessory factors in DnaE2-dependent mutagenesis in *Mycobacterium tuberculosis*. *Proc Natl Acad Sci U S A* 107: 13093-8
