# Supplementary material for: Structure elucidation of the redox cofactor mycofactocin reveals oligo-glycosylation by MftF
Source: Chem Sci. 2020 Apr 23;11(20):5182–90. doi: 10.1039/d0sc01172j (PMC7491314; doi:10.1039/d0sc01172j)
Supplement: Supplementary file 1 [file SC-011-D0SC01172J-s001.xlsx]

## Sheet: Val+Tyr 13C labeled candidates
Data Set 1: 13C-labeled compounds: Table of labeled compounds (per file) computationally derived from raw LC-MS runs of bacterial extracts by Compound Discoverer 3.0. Labeled cultures were grown on media supplemented with on L-Val-13C5 and L-Tyr-13C9, unlabeled cultures grown on natural L-Val and L-Tyr. Sheet 1: candidate compounds after filtering. Sheet 2: all compounds from LC-MS with a scan ra…
Compound	Molecular Weight	RT [min]	FWHM [min]	Max. # MI	# Adducts	Area	Max. Exchange	Avg. Exchange	Rel. Exchange [%]	Status	Exchange Rate [%]: 0	Exchange Rate [%]: 1	Exchange Rate [%]: 2	Exchange Rate [%]: 3	Exchange Rate [%]: 4	Exchange Rate [%]: 5	Exchange Rate [%]: 6	Exchange Rate [%]: 7	Exchange Rate [%]: 8	Exchange Rate [%]: 9	Exchange Rate [%]: 10	Exchange Rate [%]: 11	Exchange Rate [%]: 12	Exchange Rate [%]: 13	Exchange Rate [%]: 14	Exchange Rate [%]: 15	Exchange Rate [%]: 16	Study File ID	Culture
PMTF	233.105	7.295	0.1	9	1	81237.2	13	11.4	87.968	Irregular exchange	3.5626	0	0	2.49769	0	3.98094	0	0.15807	6.71602	0	0	5.68237	7.38515	70.0172				F13	labeled
	233.105	7.294	0.114	7	1	82553.4	13	11	84.9601	Irregular exchange	4.17807	0	0	3.53904	0	4.11696	0	0	11.3919	0	0	4.78156	6.35447	65.638				F14	labeled
	233.105	7.267	0.095	7	1	42105.2	13	11.2	86.2939	Irregular exchange	3.74591	0	0	1.72657	0	5.19505	0	0	9.79763	0	0	7.47848	6.71105	65.3453				F15	labeled
	233.105	7.312	0.111	7	1	31091.4	13	9.5	73.3517	Low pattern fit	6.79257	0	0	6.1049	0	2.25846	0	0	31.2623	0	0	9.68782	3.32049	40.5735				F16	labeled
	233.105	7.3	0.095	5	1	51087.2	13	1.3	9.63519	Contaminating mass	83.3844	0	0	5.05209	0	0	0.000128288	0	5.69893	0	0	5.86445	0	0				F6	unlabeled
	233.105	7.209	0.157	4	1	4507.68	13	5.4	41.5911	Contaminating mass	37.1669	0	0	14.2739	0	0	0.000272285	0	12.0957	0	0	36.4631	0	0				F1	blank
	233.105	7.281	0.124	5	1	91619.6	13	1.1	8.08073	Contaminating mass	87.5699	0	0	1.88308	0	0	0.000124682	0	5.53873	0	0	5.00815	0	0				F7	unlabeled
	233.105	7.286	0.113	5	1	67132.1	13	1.4	10.812	Contaminating mass	84.3169	0	0	0.619002	0	0	0.000202641	0	9.00194	0	0	6.06198	0	0				F8	unlabeled
	233.105	7.306	0.106	5	1	66934.4	13	1.6	12.4682	Contaminating mass	79.5549	0	0	4.79272	0	0	0.000183585	0	8.1554	0	0	7.49677	0	0				F5	unlabeled
AHDP	234.137	6.585	0.068	5	1	24921.2	13	11.9	91.9096	Irregular exchange	2.47212	0	0	0.000160868	0.00108435	5.03106	0	0	5.44508	0	0	0.00750696	5.53691	81.5061				F15	labeled
	234.137	6.586	0.066	6	1	54821.8	13	11.9	91.9164	Irregular exchange	1.97105	0	0	0.000110216	0.000771191	6.08578	0	0	4.41176	0	0	0.356962	7.99587	79.1777				F16	labeled
	234.137	6.582	0.068	6	1	30028	13	11.9	91.5009	Irregular exchange	1.84766	0	0	0.000190395	0.00128338	5.95453	0	0	6.37578	0	0	0.0878353	6.76483	78.9679				F14	labeled
	234.137	6.588	0.07	5	1	21082.8	13	11.6	89.4431	Irregular exchange	3.23409	0	0	0.000213449	0.00143877	6.67551	0	0	7.08147	0	0	0.0108247	6.34801	76.6484				F13	labeled
	234.137	6.579	0.067	3	1	14135.8	13	0.5	3.85482	Contaminating mass	93.7379	0	0	0	0	0	0.000102025	0	6.25681	0	0	0.00523288	0	0				F8	unlabeled
	234.137	6.576	0.064	3	1	29460.7	13	0.2	1.54792	Contaminating mass	96.9875	0.568186	0	0	0	0	3.98577e-05	0	2.44432	0	0	0	0	0				F7	unlabeled
	234.137	6.421	0.074	1	1	343.159	13	8	61.5382	Contaminating mass	0	0	0	0	0	0	0.0016306	0	99.9984	0	0	0	0	0				F1	blank
	234.137	6.579	0.065	3	1	52510.8	13	0.2	1.3032	Contaminating mass	97.8849	0	0	0	0	0	3.43733e-05	0	2.10798	0	0	0.00704996	0	0				F6	unlabeled
	234.137	6.579	0.071	3	1	21622.3	13	0.5	3.55449	Contaminating mass	94.2261	0	0	0	0	0	9.4057e-05	0	5.76815	0	0	0.00569126	0	0				F5	unlabeled
PMFTH2	235.121	6.957	0.079	9	1	72855.5	13	11.6	89.6035	Irregular exchange	2.42319	0	0	0.806716	0	4.4926	0	2.75464	6.84819	0	0.0798248	0.308658	8.0194	74.2668				F15	labeled
	235.121	6.95	0.097	9	1	76086.7	13	10.9	84.1911	Irregular exchange	2.88311	0	0	1.72114	0	4.04814	0	12.6055	7.11565	0	0	0.306979	6.61288	64.7066				F14	labeled
	235.121	6.943	0.098	7	1	45559.2	13	10.7	82.5866	Irregular exchange	1.66723	0	0	1.8946	0	3.9412	0	15.6629	10.8763	0	0	4.10017e-05	5.86618	60.0916				F16	labeled
	235.121	6.938	0.091	9	1	73333	13	10.1	77.4842	Irregular exchange	3.39138	0	0	2.8202	0	5.04501	0.0134802	19.179	11.8263	0	0	0.215419	5.32533	52.1839				F13	labeled
	235.121	6.952	0.094	7	1	54844.5	13	1.3	9.93417	Contaminating mass	81.8558	0	0	2.87435	0	0	0.000362545	5.05793	9.2333	0	0	0.734883	0	0.243338				F8	unlabeled
	235.121	7.149	0.072	4	1	15158.3	13	6	46.0461	Contaminating mass	18.0059	0.0403022	0.00097807	11.4235	0	0	0.000717767	0	70.5179	0	0	0	0	0.0106808				F1	blank
	235.121	6.946	0.084	4	1	45047.9	13	2.2	16.788	Contaminating mass	69.8372	0.313626	0	4.17844	0	0	0.000465745	0	25.664	0	0	0	0.00180975	0.00449037				F6	unlabeled
	235.121	6.94	0.107	6	1	54773.4	13	2.2	16.8163	Contaminating mass	69.7558	0	0	1.36601	0	0	0.000392021	19.9406	7.7938	0	0	1.1434	0	0				F5	unlabeled
	235.121	6.957	0.097	5	1	66650.4	13	1.3	9.9682	Contaminating mass	82.652	0	0	2.44299	0	0	0.000315071	0	13.8986	0	0	1.00606	0	0				F7	unlabeled
MFT-1H2	397.174	6.94	0.045	1	1	480.811	16	13	81.2498	Contaminating mass	0	0	0	0	0	0	0	0	0	0	0.00098762	0	0	99.999	0	0	0	F1	blank
	397.174	6.962	0.091	6	1	20800.1	16	12.4	77.6398	No warnings	0	0	0.000246791	0.000643756	0	3.74513	0	0	4.03684	0	0	0	8.3462	83.5614	0.0954327	0	0.214119	F16	labeled
	397.174	6.96	0.096	7	1	38036	16	12.2	76.2757	Irregular exchange	0.124248	0	0	0	0.000482284	3.87454	1.91312	0	5.10575	0	0	0	8.05193	80.9299	0	0	0	F14	labeled
	397.174	6.952	0.083	7	1	41252.7	16	12.3	76.812	Irregular exchange	0.167893	0	0	2.79944e-05	0	4.07989	0	0	5.13445	0	0	0.348891	9.8166	80.4522	0	0	0	F15	labeled
	397.174	6.95	0.084	5	1	27436.8	16	12.2	76.2952	Irregular exchange	0	0	0.000312073	0.000811771	0	4.73404	0	0	6.43306	0	0	0	9.22797	79.6038	0	0	0	F13	labeled
	397.174	6.971	0.094	6	1	19497.3	16	2.3	14.2539	Contaminating mass	80.0124	0.278772	0	0	0	0	4.004	0	0.286164	0	0	0	0.00030235	14.3914	1.02698	0	0	F6	unlabeled
	397.174	6.942	0.107	3	1	20870.6	16	0.9	5.62082	Contaminating mass	93.0821	0	0	0	0	0	0	0	0	0	6.8323e-05	0	0	6.91788	0	0	0	F5	unlabeled
	397.174	6.962	0.088	5	1	29749.1	16	0.9	5.40627	Contaminating mass	91.8008	0	0	0	0.00032523	0	2.8062	0	0.0886097	0	0	0	0	5.30407	0	0	0	F7	unlabeled
	397.174	6.957	0.095	4	1	25355.3	16	0.7	4.51321	Contaminating mass	94.1179	0	0	0	8.11013e-05	0	0.607884	0	0	0	5.20885e-05	0	0	5.27409	0	0	0	F8	unlabeled
MMFT-2H2	573.243	6.957	0.095	2	1	2590.16	16	13	81.0095	No warnings	0	0	0	0	0	0	0	0	0	0	0.0470461	0.157833	3.39103	96.4041	0	0	0	F16	labeled
	573.243	6.949	0.087	3	1	4406.63	16	12.9	80.9131	No warnings	0	0	0	0	0	0	0	0	0	0	0	0.0775556	6.13152	92.8943	0.896609	0	0	F13	labeled
	573.243	6.951	0.083	3	1	6439.7	16	12.9	80.8222	No warnings	0	0	0	0	0	0	0	0	0	0	0	0.0768345	6.94083	92.7321	0.250235	0	0	F15	labeled
	573.243	6.954	0.079	5	1	5619.52	16	12.7	79.6094	No warnings	0	0	0.00169241	0.00111662	0	1.43352	0	0	1.45776	0	0	0.0749502	7.31291	89.7181	0	0	0	F14	labeled
	573.243	6.954	0.112	2	1	5085.99	16	0	0	No warnings	100	0	0	0	0	0	0	0	0	0	0	0	0	0	0	0	0	F8	unlabeled
	573.243	6.95	0.096	1	1	3013.16	16	0	0	No warnings	100	0	0	0	0	0	0	0	0	0	0	0	0	0	0	0	0	F6	unlabeled
	573.243	6.95	0.085	2	1	3621.38	16	0	0	No warnings	100	0	0	0	0	0	0	0	0	0	0	0	0	0	0	0	0	F5	unlabeled
	573.243	6.955	0.094	2	1	5599.36	16	0	0	No warnings	100	0	0	0	0	0	0	0	0	0	0	0	0	0	0	0	0	F7	unlabeled
VY-925	925.112	7.161	0.064	2	1	2125.02	16	13	81.2413	No warnings	0	0	0	0	0	0	0	0	0	0	0	0.0695027	0	99.9305	0	0	0	F16	labeled
	925.112	7.162	0.07	6	1	4898.8	16	13.2	82.3415	No warnings	0	0	0	0	0	0	0	3.82911e-07	7.93976e-07	0	0	2.41585e-05	5.17264	80.996	6.23807	6.38153	1.21172	F14	labeled
	925.112	7.161	0.052	5	1	3936.75	16	13.2	82.7433	Irregular exchange	0	0	0	0	0	0	0	2.69765e-06	0	0	0	0.000284061	3.15072	80.0476	11.2444	0.870857	4.68612	F13	labeled
	925.112	7.162	0.072	6	1	6937.24	16	13	81.0025	No warnings	0	0	0	0.000425195	0	0	0.0116047	0	3.37911	0	0	0	5.08754	78.0807	10.9304	0.352285	2.15796	F15	labeled
	925.112	7.165	0.059	1	1	2606.87	16	0	0	No warnings	100	0	0	0	0	0	0	0	0	0	0	0	0	0	0	0	0	F6	unlabeled
	925.112	7.17	0.077	2	1	6384.13	16	0	0	No warnings	100	0	0	0	0	0	0	0	0	0	0	0	0	0	0	0	0	F5	unlabeled
	925.112	7.166	0.064	2	1	6493.62	16	0	0	No warnings	100	0	0	0	0	0	0	0	0	0	0	0	0	0	0	0	0	F8	unlabeled
	925.112	7.168	0.059	2	1	7146.38	16	0	0	No warnings	100	0	0	0	0	0	0	0	0	0	0	0	0	0	0	0	0	F7	unlabeled
MMFT-7	1381.49	7.193	0.057	3	2	7065.43	16	0	0	No warnings	100	0	0	0	0	0	0	0	0	0	0	0	0	0	0	0	0	F17	unlabeled
	1381.49	7.196	0.059	2	2	4810.04	16	0	0	No warnings	100	0	0	0	0	0	0	0	0	0	0	0	0	0	0	0	0	F20	unlabeled
	1381.49	7.203	0.056	5	2	2349.45	16	12.6	78.6629	No warnings	0	0	0	0	0.301617	3.07042	0	0	0.75216	0	0	0	10.3551	85.5207	0	0	0	F48	labeled
	1381.49	7.196	0.056	5	2	2196.39	16	12.9	80.6335	No warnings	0	0	0	0	0	0	0	0	0	0	0	0	9.86468	90.1353	0	0	0	F47	labeled
	1381.49	7.193	0.057	9	2	5342.59	16	12.4	77.6859	No warnings	0	0	0	0	0.250026	3.59342	0	0	3.20428	0	0	0	10.0066	82.9457	0	0	0	F45	labeled
	1381.49	7.202	0.057	2	2	6725.84	16	0	0	No warnings	100	0	0	0	0	0	0	0	0	0	0	0	0	0	0	0	0	F18	unlabeled
	1381.49	7.203	0.055	7	2	2747.75	16	12.6	78.6315	No warnings	0	0	0	0	0.0674392	2.78047	0	0	2.06071	0	0	0	8.74164	86.3497	0	0	0	F46	labeled
	1381.49	7.191	0.058	2	2	9376.59	16	0	0	No warnings	100	0	0	0	0	0	0	0	0	0	0	0	0	0	0	0	0	F19	unlabeled
MFT-7H2	1383.51	6.833	0.057	2	3	10032.7	16	0	0	No warnings	100	0	0	0	0	0	0	0	0	0	0	0	0	0	0	0	0	F19	unlabeled
	1383.51	6.837	0.059	3	3	7305.88	16	0	0	No warnings	100	0	0	0	0	0	0	0	0	0	0	0	0	0	0	0	0	F17	unlabeled
	1383.51	6.843	0.056	2	3	5170.02	16	0.1	0.389841	No warnings	93.7625	6.23745	0	0	0	0	0	0	0	0	0	0	0	0	0	0	0	F20	unlabeled
	1383.51	6.843	0.059	5	3	4126.11	16	12.8	80.0012	No warnings	0	0	0	0	0.247806	0.937335	0	0	0	0	0	0	10.2526	88.5623	0	0	0	F46	labeled
	1383.51	6.839	0.059	2	3	6210.85	16	0	0.309394	No warnings	95.0497	4.95031	0	0	0	0	0	0	0	0	0	0	0	0	0	0	0	F18	unlabeled
	1383.51	6.844	0.057	7	3	8315.36	16	12.5	78.1697	No warnings	0	0	0	0	0.247201	3.36974	0	0.0336755	1.66278	0	0	0	11.5869	83.0997	0	0	0	F48	labeled
	1383.51	6.83	0.055	8	3	8503.44	16	12.5	78.385	No warnings	0	0	0	0	0.251716	2.4278	0	0.0190846	2.52394	0	0	0	11.4179	83.3596	0	0	0	F47	labeled
	1383.51	6.838	0.058	6	3	5871.65	16	12.5	78.2416	No warnings	0	0	0	0	0.464513	2.07657	0	0.0795384	3.19245	0	0	0	10.9014	83.2855	0	0	0	F45	labeled
MMFT-7H2 (NH4 adduct)	1398.52	7.19	0.057	1	1	5634.09	16	0	0	Low pattern fit	100	0	0	0	0	0	0	0	0	0	0	0	0	0	0	0	0	F17	unlabeled
	1398.52	7.193	0.057	8	1	4149.72	16	12.3	76.8011	Irregular exchange	0	0	0	0	0.426817	4.52165	0	0	4.00507	0	0	0	11.1426	79.9038	0	0	0	F45	labeled
	1398.52	7.202	0.056	4	1	1939.79	16	12.5	78.0857	No warnings	0	0	0	0	0.471883	3.59728	0	0	0.827717	0	0	0	13.4651	81.6381	0	0	0	F48	labeled
	1398.52	7.196	0.059	1	1	3890.31	16	0	0	Low pattern fit	100	0	0	0	0	0	0	0	0	0	0	0	0	0	0	0	0	F20	unlabeled
	1398.52	7.191	0.058	2	1	7233.98	16	0	0	No warnings	100	0	0	0	0	0	0	0	0	0	0	0	0	0	0	0	0	F19	unlabeled
	1398.52	7.197	0.057	2	1	5589.19	16	0	0	No warnings	100	0	0	0	0	0	0	0	0	0	0	0	0	0	0	0	0	F18	unlabeled
	1398.52	7.196	0.056	2	1	1875.88	16	12.7	79.5131	No warnings	0	0	0	0	0.496012	1.40441	0	0	0	0	0	0	12.0907	86.0089	0	0	0	F47	labeled
	1398.52	7.205	0.055	6	1	2166.48	16	12.5	78.0176	No warnings	0	0	0	0	0.214314	3.21045	0	0	2.53882	0	0	0	11.4124	82.6241	0	0	0	F46	labeled
MFT-8H2	1545.56	6.801	0.058	2	6	22417.1	16	0	0.285098	No warnings	99.6131	0	0	0	0	0	0	0	0	0	0.00071882	0.0794138	0.306736	0	0	0	0	F17	unlabeled
	1545.56	6.805	0.055	2	6	14648.4	16	0.1	0.44647	No warnings	99.3942	0	0	0	0	0	0	0	0	0	0.00112569	0.124364	0.480355	0	0	0	0	F18	unlabeled
	1545.56	6.806	0.049	11	6	13854.1	16	12.8	79.7197	Irregular exchange	0	0	0	0	0.207653	1.22305	0	0.302807	2.96856	0	0	0.00688872	10.9646	78.3903	1.02892	0.943163	3.96398	F46	labeled
	1545.56	6.794	0.053	13	6	25149.9	16	12.5	78.3862	No warnings	0	0	5.88553e-07	0.000134789	0.146894	2.89097	0.295856	0.103116	3.687	0	0	0.00177737	10.2593	79.0706	0	0.614771	2.9296	F47	labeled
	1545.56	6.807	0.054	10	6	17819.6	16	12.5	77.8406	No warnings	0	0	0	0	0.220507	3.78944	0	0.199735	1.81303	0.0407226	0	0.00393163	12.2933	81.3795	0.0429174	0.216882	0	F48	labeled
	1545.56	6.796	0.058	3	6	29716.5	16	0	0.239207	No warnings	99.6754	0	0	0	0	0	0	0	0	0	0.000603113	0.0666308	0.257361	0	0	0	0	F19	unlabeled
	1545.56	6.802	0.056	11	6	18257.1	16	12.4	77.6841	Irregular exchange	0	0	0	0	0.372895	3.86524	0	0.244299	4.80563	0	0	0.616073	12.1614	70.7875	0	5.32906	1.81787	F45	labeled
	1545.56	6.807	0.057	2	6	16006.8	16	0.1	0.453778	No warnings	99.3842	0	0	0	0	0	0	0	0	0	0.00114411	0.126399	0.488217	0	0	0	0	F20	unlabeled
MMFT-8 (NH4 adduct)	1560.57	7.15	0.058	10	1	6363.96	16	12.2	76.3607	Irregular exchange	0	0	0	0	0.219023	5.06961	0	0	5.35328	0	0	0	10.2241	78.4887	0	0.645283	0	F45	labeled
	1560.57	7.162	0.056	9	1	3088.54	16	12.6	78.4394	No warnings	0	0	0	0	0	2.63061	0.303895	0	3.279	0	0	0	10.4381	81.6701	0	0	1.67833	F46	labeled
	1560.57	7.149	0.059	2	1	9865.19	16	0	0	No warnings	100	0	0	0	0	0	0	0	0	0	0	0	0	0	0	0	0	F19	unlabeled
	1560.57	7.151	0.055	5	1	2474.17	16	12.8	80.0601	No warnings	0	0	0	0	0	0	0	0.601935	1.27433	0	0	0	9.05572	89.068	0	0	0	F47	labeled
	1560.57	7.159	0.057	2	1	1904.37	16	12.9	80.7763	No warnings	0	0	0	0	0	0	0	0	0	0	0	0	7.57927	92.4207	0	0	0	F48	labeled
	1560.57	7.159	0.059	2	1	5588.26	16	0	0	No warnings	100	0	0	0	0	0	0	0	0	0	0	0	0	0	0	0	0	F18	unlabeled
	1560.57	7.156	0.059	1	1	5146.61	16	0	0	Low pattern fit	100	0	0	0	0	0	0	0	0	0	0	0	0	0	0	0	0	F20	unlabeled
MMFT-8H2 (NH4 adduct)	1562.59	6.794	0.053	11	1	6214.45	16	12.6	78.6381	Irregular exchange	0	0	0	0	0	3.32533	0.893223	0	4.2261	0	0	0	13.0006	67.8244	0	6.9952	3.73509	F47	labeled
	1562.59	6.805	0.055	4	1	3696.55	16	0.3	1.81576	Contaminating mass	97.531	0	0	0	0	0	0	0	0	0	0	0.575559	1.89342	0	0	0	0	F18	unlabeled
	1562.59	6.806	0.049	13	1	3719.63	16	12.7	79.4026	Irregular exchange	0	0	0	0	0.20274	3.13484	0	0.0796465	3.28217	0	0.143876	0.0806012	12.852	68.8897	0	6.32508	5.00931	F46	labeled
	1562.59	6.796	0.058	4	1	7513.45	16	0.1	0.63915	Contaminating mass	99.1309	0	0	0	0	0	0	0	0	0	0	0.202598	0.666485	0	0	0	0	F19	unlabeled
	1562.59	6.799	0.063	4	1	5851.48	16	0.2	1.12251	Contaminating mass	98.4737	0	0	0	0	0	0	0	0	0	0	0.355814	1.17052	0	0	0	0	F17	unlabeled
	1562.59	6.8	0.058	12	1	5132.68	16	12.5	78.357	Irregular exchange	0	0	0	0	0.267754	3.56871	0	0	5.58666	0.0184539	0	0.522744	12.1689	66.8766	0.498256	6.08152	4.41043	F45	labeled
	1562.59	6.807	0.057	4	1	4075.03	16	0.3	1.70486	Contaminating mass	97.6818	0	0	0	0	0	0	0	0	0	0	0.540407	1.77778	0	0	0	0	F20	unlabeled
	1562.59	6.807	0.054	10	1	4473.45	16	12.4	77.3942	Irregular exchange	0	0	0	0	0.128911	4.87167	0	0	3.03536	0	0	0	14.2449	74.6688	0	1.28837	1.76204	F48	labeled

## Sheet: all compounds mz 200-600
MFT Candidate	Molecular Weight	RT [min]	FWHM [min]	Max. # MI	# Adducts	Area	Max. Exchange	Avg. Exchange	Rel. Exchange [%]	Status	Exchange Rate [%]: 0	Exchange Rate [%]: 1	Exchange Rate [%]: 2	Exchange Rate [%]: 3	Exchange Rate [%]: 4	Exchange Rate [%]: 5	Exchange Rate [%]: 6	Exchange Rate [%]: 7	Exchange Rate [%]: 8	Exchange Rate [%]: 9	Exchange Rate [%]: 10	Exchange Rate [%]: 11	Exchange Rate [%]: 12	Exchange Rate [%]: 13	Exchange Rate [%]: 14	Exchange Rate [%]: 15	Exchange Rate [%]: 16	Study File ID
No	200	3.51	0.093	2	2	8474.23	4	0.4	10.5448	Contaminating mass	80.6937	0	17.523	0	1.78328													F7
No	200	3.464	0.093	2	2	7792.41	4	0.2	4.82166	Irregular exchange	90.4292	0	9.49829	0	0.072513													F15
No	200	3.511	0.093	2	2	8110.12	4	0.2	4.75895	Contaminating mass	90.6188	0	9.22207	0.0450137	0.114151													F6
No	200	3.52	0.086	2	2	7635.37	4	0.7	17.4919	Contaminating mass	65.0162	0	34.9838	0	0													F8
No	200	3.463	0.091	1	2	5717.34	4	0	0.368557	No warnings	99.5966	0	0	0.139491	0.263939													F5
No	200	3.474	0.101	2	2	7883.79	4	0.4	10.0712	Irregular exchange	79.8576	0	20.1424	0	0													F13
No	200	3.533	0.098	1	2	6424.55	4	0.1	1.96103	No warnings	96.2296	0	3.59914	0.0391227	0.132122													F1
No	200	3.456	0.094	2	2	8909.6	4	0.4	9.42097	Irregular exchange	81.1581	0	18.8419	0	0													F16
No	200	3.512	0.083	2	2	8539.17	4	0.5	12.5869	Irregular exchange	74.8269	0	25.1725	0	0.000613557													F14
No	200.03	3.351	0.127	1	1	15365.7	5	0.6	11.672	Contaminating mass	80.9976	0	0.00215928	17.6454	1.35482	0												F5
No	200.03	3.377	0.092	1	1	6377.02	5	0.2	4.73321	Irregular exchange	93.3675	0	0	4.7481	0	1.88435												F13
No	200.03	3.358	0.141	2	1	9563.58	5	0.1	2.9934	Contaminating mass	95.011	0	0	4.98899	0	0												F7
No	200.03	3.376	0.121	1	1	43496	5	0.4	7.94384	Irregular exchange	87.1604	0	0.00158334	11.6636	1.14675	0.027673												F15
No	200.03	3.383	0.226	1	1	3823.37	5	0.3	6.45397	Contaminating mass	89.2124	0.0465272	0	10.7411	0	0												F6
No	200.03	3.425	0.114	2	1	5740.2	5	0.3	6.6859	Irregular exchange	90.1085	0	0	8.01394	0	1.87754												F16
No	200.03	3.369	0.125	2	1	7820.4	5	0.5	9.02937	Contaminating mass	85.2701	0	0.000296103	13.8274	0.846943	0.0552306												F8
No	200.03	3.33	0.18	2	1	20771.3	5	0.6	12.8714	Low pattern fit	79.9123	0	0.0040679	15.9985	4.07261	0.0125265												F14
No	200.048	9.297	0.12	4	1	4586.85	5	2.3	46.1431	Contaminating mass	23.5706	0.294627	17.5441	39.0304	19.5603	0												F5
No	200.048	9.26	0.066	2	1	1700.91	5	2.3	46.2094	Contaminating mass	9.18913	0	41.3858	49.4251	0	0												F6
No	200.048	9.346	0.069	2	1	5958.27	5	3	59.9931	Contaminating mass	2.44268	0	20.0261	63.8714	0	13.6598												F7
No	200.048	9.65	0.066	2	1	29559.7	5	3.2	64.2421	Irregular exchange	6.78354	0	3.20865	51.1274	32.991	5.88945												F16
No	200.048	9.173	0.102	1	1	9601.94	5	3.3	65.8799	Contaminating mass	2.07031	0	3.82065	74.3935	0	19.7155												F1
No	200.048	9.296	0.097	2	1	3886.21	5	2.7	54.2946	Low pattern fit	11.8945	0	28.0128	35.4693	14.0777	10.5457												F13
No	200.048	9.596	0.076	2	1	23028.5	5	3.3	66.9635	Contaminating mass	4.19249	0	4.52519	51.7736	27.0975	12.4113												F8
No	200.048	9.32	0.056	2	1	6407.96	5	3	59.7755	Low pattern fit	8.65064	0	21.388	41.903	9.89902	18.1593												F15
No	200.048	9.31	0.058	2	1	5038.1	5	2.8	55.775	Low pattern fit	6.10093	0	23.2445	55.7087	9.46914	5.47666												F14
No	200.051	9.787	0.758	4	1	204877	9	4.1	45.8276	Contaminating mass	7.43004	0	1.89242	0.000801212	71.4457	11.9856	0	1.12475	0.00932951	6.11134								F1
No	200.051	9.513	0.017	4	1	11410.7	9	3.2	35.4293	Low pattern fit	47.0917	0	1.05042	0	0	35.0045	1.54944	2.6319	0.0272992	12.6447								F14
No	200.051	8.926	0.571	4	1	78434.1	9	3.8	42.3442	Irregular exchange	12.8838	0	1.43602	0	64.2456	17.0778	0	1.67538	0.00556882	2.67576								F16
No	200.051	9.803	0.685	4	1	161792	9	4	44.0231	Contaminating mass	10.0651	0	0.155217	0.000409554	77.3448	6.18472	0	0.322102	0.0102432	5.91741								F6
No	200.051	9.246	0.016	3	1	16172.2	9	6.1	67.7683	Low pattern fit	4.56599	0	1.23567	0	0	59.5961	0	0.967954	0.0217329	33.6126								F15
No	200.051	9.639	0.775	3	1	157924	9	4	43.9895	Irregular exchange	7.22269	0	0.120949	2.53643e-05	84.1454	4.25143	0	0.253443	0.00441552	4.00167								F13
No	200.051	9.812	0.811	4	1	246440	9	4	44.0228	Contaminating mass	6.97817	0	0.098582	0	84.7009	4.11591	0	0.160481	0.0122374	3.93375								F7
No	200.051	9.259	0.045	2	1	11753.9	9	2.8	31.0752	Contaminating mass	68.1756	0	0	0	0	0	0	3.34298	0.0575024	28.424								F8
No	200.051	9.669	0.97	4	1	233667	9	4	44.7709	Contaminating mass	5.44378	0	0.0951555	0.000564361	85.476	4.89092	0	0.224522	0.00599604	3.86306								F5
No	200.059	6.195	0.065	6	1	43891.6	11	1.2	10.5214	Irregular exchange	81.3476	0	0	6.71106	0	0	0.705385	0	10.742	0	0	0.493944						F14
No	200.059	6.18	0.086	6	1	48496.8	11	0.7	6.37442	Contaminating mass	90.0741	0	0	1.27295	0	0	2.70735	0	5.11546	0	0	0.830188						F1
No	200.059	6.196	0.064	7	1	35370	11	0.6	5.7059	Irregular exchange	87.932	0	1.1447	5.22705	0	0	1.22346	0	3.91569	0	0	0.557094						F13
No	200.059	6.166	0.059	4	1	36275.5	11	0.7	6.52252	Contaminating mass	89.249	0	0	2.12311	3.99851e-06	0	2.38511	0	5.86778	0	0	0.375042						F8
No	200.059	6.193	0.072	5	1	35849.9	11	0.7	6.37249	Irregular exchange	87.8885	0.457677	0	3.92762	0	0	1.98101	0	5.74209	0	0	0.0030945						F16
No	200.059	6.211	0.088	5	1	47484.5	11	1.2	10.9044	Irregular exchange	81.5259	0	0	5.15448	0	0	1.76376	0	11.0709	0	0	0.48502						F15
No	200.059	6.176	0.067	6	1	39420.5	11	0.9	8.07916	Contaminating mass	87.7922	0	0	0.816445	0	0	3.35818	0	7.36432	0	0	0.668881						F6
No	200.059	6.191	0.089	3	1	27614.1	11	0.2	1.94905	Contaminating mass	95.292	0	0	2.29356	0	0	2.39998	0	0	0	0	0.0144529						F5
No	200.059	6.177	0.085	5	1	56742.7	11	0.7	6.43856	Contaminating mass	89.2721	0	0	2.68679	0	0	1.9734	0	5.27399	0	0	0.793767						F7
No	200.062	5.566	0.035	1	1	137100	8	2.3	28.3884	Low pattern fit	0	0.0172023	90.9357	0	0.640763	8.09757	0	0.302109	0.00660683									F15
No	200.062	5.505	0.036	2	1	190478	8	2.1	26.7039	Contaminating mass	0	0	95.2528	2.07686	0.595358	0.00546573	0.000147	2.06933	0									F5
No	200.062	5.566	0.13	1	1	9490.23	8	3.6	45.3364	Low pattern fit	0	0	0	80.9114	4.55439	0	0	14.5342	0									F13
No	200.062	5.608	0.056	1	1	25574.9	8	0.1	1.81176	Contaminating mass	95.4124	0	0	4.40478	0	0	0	0.182816	0									F8
No	200.062	5.669	0.275	1	1	101208	8	2	25.1422	Low pattern fit	0	0.0179159	99.4796	0	0.389297	0.09948	0	0.00361787	0.0101012									F16
No	200.062	5.714	0.059	1	1	7266.74	8	4.7	58.3505	Low pattern fit	0	0	0	0	39.6293	57.154	0	3.21665	0									F14
No	200.062	5.629	0.21	2	1	140100	8	2	25.5474	Contaminating mass	0	0.0184272	98.7587	0	0.572195	0	0	0.650651	0									F6
No	200.062	5.684	0.236	2	1	154262	8	2.2	27.279	Contaminating mass	0	0.0172159	95.2964	0	1.70757	0.029786	0	2.94899	0									F7
No	200.062	5.421	0.212	2	1	307043	8	2.1	26.3268	Contaminating mass	0	0.0104022	93.0102	6.05284	0	0.0305176	0	0.895374	0.000650252									F1
No	200.065	6.57	0.045	2	2	6729.98	5	1.2	24.2099	Irregular exchange	68.8392	0	3.66346e-05	3.59397	27.5668	0												F15
No	200.065	6.564	0.083	1	1	3905.14	5	0	0.042822	Low pattern fit	99.8929	0	0.107055	0	0	0												F16
No	200.065	6.593	0.083	2	2	24476.7	5	2	40.6874	Contaminating mass	38.9431	11.769	2.74181	0	46.5462	0												F7
No	200.065	6.593	0.071	1	2	8401.09	5	2.9	57.9673	Contaminating mass	21.642	2.67561	7.78433	0	67.898	0												F5
No	200.065	6.174	0.067	2	1	51653.3	5	0.5	10.0879	Contaminating mass	81.4562	2.61439	8.46339	0	6.43185	1.03414												F1
No	200.065	6.594	0.076	2	2	13806.4	5	0.2	3.70515	Contaminating mass	95.0803	0	0.57655	0	4.34317	0												F8
No	200.065	6.488	0.041	2	1	5407.87	5	1.1	21.368	Contaminating mass	72.9922	0	0.595568	0	26.4122	0												F6
No	200.065	6.509	0.045	2	2	4243.59	5	2.6	52.045	Irregular exchange	0	34.1867	19.3967	0	44.838	1.57865												F14
No	200.065	6.129	0.03	2	2	45392.4	5	0.9	17.1791	Irregular exchange	72.9213	4.27589	5.79149	5.31409e-05	15.0196	1.99159												F13
No	200.066	5.767	0.069	3	1	15870.8	5	0.3	5.9415	Contaminating mass	91.4382	1.45441	0.134294	0	6.881	0.0920994												F6
No	200.066	5.774	0.065	3	1	22742.6	5	0.1	2.62693	Contaminating mass	95.8075	1.21182	0	0	2.98071	0												F8
No	200.066	5.775	0.065	2	1	23758.8	5	0	0.232473	No warnings	98.9918	0.96968	0	0	0	0.0385374												F16
No	200.066	5.79	0.072	3	1	14743.1	5	0.2	4.9596	Irregular exchange	93.3363	0.550845	0.102187	0	6.01069	0												F13
No	200.066	5.765	0.064	3	1	18173.2	5	0.2	3.89858	Contaminating mass	94.7263	0.483111	0.0763585	0	4.71427	0												F7
No	200.066	5.778	0.065	3	1	18743.7	5	0.3	6.7813	Irregular exchange	91.2991	0	0.448596	0	8.25233	0												F14
No	200.066	5.796	0.067	2	1	20776	5	0.2	4.86064	Contaminating mass	87.293	1.11698	11.588	0	0	0.00205488												F1
No	200.066	5.768	0.058	4	1	15314.3	5	0.5	9.50649	Contaminating mass	87.9764	0.187344	0	0	11.8363	0												F5
No	200.066	5.769	0.069	2	1	13533.3	5	0	0.190767	No warnings	99.5959	0	0.355546	0	0	0.0485483												F15
No	200.08	2.605	0.094	2	1	9210	8	0.1	1.5694	Contaminating mass	97.8937	0	0	0	0	0.0825783	2.02372	0	0									F7
No	200.08	2.627	0.077	3	1	10361.2	8	0.2	3.07814	No warnings	95.8865	0	0	0	0	0.0560401	4.05748	0	0									F14
No	200.08	2.62	0.085	3	1	7180.97	8	0.2	2.5364	No warnings	96.6127	0	0	0	0	0.0329078	3.35444	0	0									F13
No	200.08	2.628	0.102	2	1	11437	8	0.2	2.20864	No warnings	97.0551	0	0	0	1.62905e-05	0	2.94484	0	0									F16
No	200.08	2.598	0.021	5	1	9266.88	8	1.1	14.1229	Contaminating mass	65.8994	0.0659274	0	25.1239	7.95981	0	0.951036	0	0									F5
No	200.08	2.668	0.094	2	1	12063.2	8	0.2	3.03584	Contaminating mass	95.5163	0	0	0	1.0334e-05	2.61563	1.86809	0	0									F8
No	200.08	2.567	0.02	2	1	5050.2	8	3.5	43.2403	Contaminating mass	0	0	0.00189171	59.0168	36.0383	4.94296	0	0	0									F1
No	200.08	2.626	0.086	2	1	7010.96	8	0	0.613508	No warnings	99.182	0	0	0	4.52511e-06	0	0.818007	0	0									F6
No	200.08	2.641	0.079	4	1	11206.6	8	0.6	6.88017	Irregular exchange	89.3533	0	0	0	0	8.83884	1.80787	0	0									F15
No	200.082	8.479	0.07	2	1	11301.3	9	1.8	19.4937	Contaminating mass	69.3889	2.68879e-06	0.000263866	1.6347	3.39817	15.8925	0	0	9.68547	0								F8
No	200.082	8.478	0.081	2	1	8544.91	9	0.4	4.74993	Low pattern fit	87.7523	0	0	10.5709	0	0.792633	0	0	0.884172	0								F16
No	200.082	8.504	0.077	2	1	13036.9	9	1	11.3535	Contaminating mass	77.1262	0	0	7.5265	0.000861304	14.391	0	0	0.955465	0								F7
No	200.082	8.499	0.079	2	1	19816.6	9	2.5	28.2467	Irregular exchange	53.396	8.20014e-06	0.00142835	8.11697	18.5564	1.26444	0	0	18.6648	0								F13
No	200.082	8.478	0.121	2	1	9335.19	9	1.5	16.2358	Contaminating mass	76.7857	0	0	0	9.89806	0	0	0	13.3163	0								F6
No	200.082	8.445	0.096	2	1	8007.1	9	0.4	4.54777	Low pattern fit	87.7091	0	0	10.9976	0	0.80314	0	0	0.490158	0								F14
No	200.082	8.51	0.08	2	1	8760.05	9	0.4	4.39379	Contaminating mass	90.8637	0	0	0.000806416	8.38564	0	0	0	0.749889	0								F1
No	200.082	8.494	0.074	2	1	11368.4	9	1.6	17.6553	Contaminating mass	55.8942	0	4.49976e-06	19.6901	22.2516	2.1641	0	0	0	0								F5
No	200.082	8.496	0.071	3	1	25347.3	9	3.3	36.6165	Irregular exchange	38.2011	5.43009e-06	0.000767518	20.528	15.1491	0.533958	0	1.04381e-05	25.5871	0								F15
No	200.091	2.718	0.076	1	1	1750.84	7	0	0	No warnings	100	0	0	0	0	0	0	0										F7
No	200.091	2.719	0.073	2	1	9363.15	7	1.6	22.414	Irregular exchange	47.9563	0	36.2808	0	0	11.7242	2.55514	1.48351										F16
No	200.091	2.719	0.067	1	1	5723.85	7	1.2	16.7388	Irregular exchange	78.1897	0	0	0	0	14.2781	6.94449	0.587683										F15
No	200.091	2.704	0.069	2	1	3673.07	7	2.3	32.402	Irregular exchange	48.5902	0	19.227	0	6.46687e-06	4.73688	27.446	0										F13
No	200.091	2.812	0.053	1	1	1087.74	7	0	0	No warnings	100	0	0	0	0	0	0	0										F1
No	200.091	2.9	0.058	1	1	1041.63	7	7	100	Contaminating mass	0	0	0	0	0	0	0	100										F6
No	200.091	2.728	0.056	1	1	3921.9	7	0.1	1.77967	Contaminating mass	97.5085	0	0	0	0	2.49154	0	0										F5
No	200.098	9.27	0.083	3	2	13566.1	9	3.5	38.8703	Irregular exchange	0.600512	49.5772	3.82946	0	12.1365	1.83277	7.12846	15.9451	0.0496735	8.90029								F16
No	200.098	9.097	0.095	3	2	47513.1	9	2.3	25.7224	Contaminating mass	39.8198	30.2921	0	0	1.87436	5.14749	4.94675	7.92721	7.12683	2.86546								F5
No	200.098	9.119	0.075	4	2	13728.2	9	1.4	15.7624	Irregular exchange	33.0342	53.5549	0	0	1.35195	0.202914	8.22951	0.0654356	0	3.56102								F13
No	200.098	9.117	0.064	2	2	19014.9	9	1.7	19.2861	Irregular exchange	18.813	67.7074	1.57434	0	0.772343	0.0818112	0	0.0226993	0.193638	10.8347								F15
No	200.098	9.11	0.081	4	2	15606.8	9	1.1	12.4287	Contaminating mass	36.8686	52.8736	0.000297973	5.21974	0.286184	0.089105	0	0.0962224	0.0351678	4.53104								F1
No	200.098	9.145	0.07	3	2	81643	9	1.4	16.0002	Contaminating mass	32.339	56.3511	0	0	0.0819962	0.171616	3.68364	0.87139	0.24809	6.2532								F8
No	200.098	8.738	0.908	3	2	35791.3	9	2.8	31.1293	Contaminating mass	0.869086	75.8577	0	0	1.76011e-05	0.0304653	1.59372	0.113742	0.0228889	21.5124								F6
No	200.098	9.113	0.08	2	2	31354.9	9	1.3	14.2114	No warnings	11.511	80.9861	1.00853	0	0.82142	0.246768	2.70183	0.0902888	0.169923	2.46415								F14
No	200.098	8.721	0.933	3	2	42467.2	9	4	44.7313	Contaminating mass	0.864188	52.0824	0	0	2.57401	3.47159	5.47977	14.5808	0.624066	20.3232								F7
No	200.102	6.561	0.076	3	1	20704.7	6	0.1	1.12502	No warnings	95.6929	3.52322	0	0	0.692481	0.0913964	0											F5
No	200.102	6.559	0.063	3	1	17715.3	6	0.1	1.91198	Contaminating mass	95.6064	2.03418	0	0	2.35943	0	0											F7
No	200.102	6.557	0.067	2	1	16119.7	6	0	0.366685	No warnings	98.8932	0.869685	0	0	0	0.0924308	0.144711											F13
No	200.102	6.562	0.069	3	1	13405	6	0.1	2.31119	Contaminating mass	95.3637	1.55939	0	0	3.07694	0	0											F6
No	200.102	6.592	0.076	3	1	17361.6	6	0.1	1.35819	No warnings	97.9848	0	0	0	1.92678	0.0883956	0											F1
No	200.102	6.561	0.062	3	1	15089	6	0.2	3.34987	No warnings	95.2843	0	0	0	4.09741	0	0.618268											F16
No	200.102	6.568	0.085	3	1	6544.57	6	0.2	3.11231	No warnings	95.375	0	0	0	4.53815	0	0.0868744											F15
No	200.102	6.564	0.066	2	1	15866.5	6	0	0.130208	No warnings	99.7732	0.115874	0	0	0	0	0.110895											F14
No	200.102	6.557	0.067	3	1	19222.9	6	0.1	1.437	No warnings	95.8533	2.655	0	0	1.49174	0	0											F8
No	200.105	8.243	0.096	3	3	139432	10	0.9	9.20508	Irregular exchange	88.6148	0	0	0.120974	0	7.18458e-05	0	6.74691	0.356887	0	4.1604							F13
No	200.105	8.266	0.114	4	3	171633	10	0.9	9.16833	Contaminating mass	87.9847	0	0	0.298248	0	8.24184e-05	4.83863e-06	8.16025	0.950412	0	2.60631							F7
No	200.105	8.244	0.098	3	3	165341	10	0.9	9.18066	No warnings	88.8408	0.0682188	0	0.34017	0	3.25017e-05	1.95612e-05	3.04643	3.82542	0	3.87892							F16
No	200.105	8.231	0.113	2	3	112664	10	8.1	80.8283	Irregular exchange	7.68059	0	0	0	0	0.000397945	7.65918e-06	37.3	1.50443	0	53.5146							F15
No	200.105	8.245	0.088	3	3	171405	10	0.6	6.05341	Contaminating mass	92.3467	0	0	0	0	4.77725e-05	4.77089e-06	4.47976	1.27968	0	1.8938							F8
No	200.105	8.233	0.104	3	3	151155	10	2.2	22.0463	Contaminating mass	69.1993	0.0690453	0	0.26966	3.84926	0	2.57163e-05	17.1256	5.28156	0	4.20556							F6
No	200.105	8.238	0.092	4	3	120759	10	1.2	11.667	Irregular exchange	85.4511	0	0	0.39052	0	8.14006e-05	5.76315e-06	7.63248	1.59349	0	4.93227							F14
No	200.105	8.257	0.103	4	3	157339	10	1.5	14.5425	Contaminating mass	80.8111	0	0	0.50651	2.22041	0	8.95563e-06	8.69246	1.75908	0	6.01042							F5
No	200.105	8.242	0.09	4	3	148593	10	2.5	25.4768	Contaminating mass	45.6244	0	0.0135333	0	44.9776	0	3.40576e-06	5.89201	0.668965	0	2.82347							F1
No	200.106	6.295	0.076	4	1	37288.7	10	7.5	75.3601	Contaminating mass	0	0.000267298	6.0138	3.16288	0	0	3.90303e-05	0.000290233	85.3225	5.50019	0							F8
No	200.106	6.3	0.083	5	1	26640.1	10	6.7	66.9078	Irregular exchange	5.35339	0	4.40456	13.277	0	0	3.30849e-05	0.000246067	72.2468	4.718	0							F14
No	200.106	6.294	0.082	5	1	30626	10	7.2	72.305	Irregular exchange	2.39743e-05	0.424081	2.77223	12.383	0	0	3.61838e-05	0.000268648	79.8527	4.56768	0							F13
No	200.106	6.295	0.082	4	1	21405.3	10	7.3	73.226	Contaminating mass	0.501361	0	11.3869	0	0	0	3.77352e-05	0.000280031	83.5192	4.59224	0							F1
No	200.106	6.29	0.079	5	1	26620.9	10	6.8	67.8744	Contaminating mass	7.69876	0	4.58563	7.47004	0	0	3.45438e-05	0.000257132	75.0471	5.19818	0							F6
No	200.106	6.294	0.085	5	1	32285.1	10	6.8	67.5607	Contaminating mass	4.85476	0	6.35666	10.2215	0	0	3.35774e-05	0.000248866	74.8741	3.6927	0							F5
No	200.106	6.306	0.102	4	1	12062.8	10	6.8	68.47	Irregular exchange	0	0.000811937	11.1807	10.4052	0	0	3.35345e-05	0.000248649	74.5969	3.81614	0							F15
No	200.106	6.304	0.085	5	1	34601.9	10	6.2	61.8927	Contaminating mass	11.7396	0	3.96134	13.6293	0	0	3.04533e-05	0.000226823	65.9103	4.75922	0							F7
No	200.106	6.3	0.09	4	1	21557.9	10	7.6	75.5101	Irregular exchange	0	0.000476817	2.98639	6.51347	0	0	3.89105e-05	0.000289427	84.9088	5.59052	0							F16
No	200.116	2.749	0.083	2	1	1319.25	9	2.7	30.4179	Contaminating mass	55.5439	11.6982	0	0	0	0	4.90007e-05	0	32.7578	0								F1
No	200.116	2.712	0.07	3	1	20072.3	9	0.1	1.28098	Contaminating mass	98.001	0.637618	0	0	0	0	2.03645e-06	0	1.3614	0								F8
No	200.116	2.705	0.076	7	1	20083.8	9	1.6	18.1979	No warnings	44.2294	16.6759	8.08425	11.6607	5.67966	12.0416	0	0	1.62852	0								F16
No	200.116	2.704	0.076	3	1	11537.5	9	0.2	2.57502	Contaminating mass	95.6155	1.70015	0	0	0	0	4.01542e-06	0	2.68437	0								F5
No	200.116	2.716	0.068	3	1	14783	9	0.1	1.07161	No warnings	96.1296	3.0455	0	0	0	0	1.23388e-06	0	0.824869	0								F7
No	200.116	2.704	0.076	7	1	28793.8	9	1.8	19.7302	No warnings	32.7495	16.2076	16.7532	17.8213	8.31387	8.03265	0	0	0.121876	0								F15
No	200.116	2.705	0.063	3	1	8373.31	9	0.2	2.76227	Contaminating mass	96.5039	0.444049	0	0	0	0	4.5654e-06	0	3.05205	0								F6
No	200.116	2.706	0.072	6	1	19839.1	9	1.8	20.0199	Irregular exchange	38.4724	19.496	0	22.4405	9.08224	9.01293	0	0	1.49594	0								F14
No	200.116	2.7	0.074	7	1	22775.5	9	1.4	15.047	Low pattern fit	51.4412	9.82894	12.9782	12.3222	6.13974	6.73495	0	0	0.554706	0								F13
No	200.12	11.908	0.161	1	1	572000	8	8	99.9725	Contaminating mass	0.0249752	0.00283416	0	0	0	0	0	0.000246375	99.9719									F6
No	200.12	11.925	0.171	1	1	594356	8	8	99.973	Low pattern fit	0.0269238	0	0	0	0	0	0	0.000246377	99.9728									F16
No	200.12	11.908	0.181	1	1	614412	8	8	99.9765	Contaminating mass	0.0233565	9.07106e-05	0	0	0	0	0	0.000246386	99.9763									F7
No	200.12	11.935	0.175	1	1	595485	8	8	99.9872	Contaminating mass	0.0105866	0.00252107	0	0	0	0	0	0.000246411	99.9866									F8
No	200.12	11.924	0.166	1	1	568372	8	8	99.9985	Low pattern fit	4.08983e-07	0.00172269	0	0	0	0	0	0.000246439	99.998									F13
No	200.12	11.928	0.16	1	1	615003	8	8	99.9747	Low pattern fit	0.0253157	0	0	0	0	0	0	0.000246381	99.9744									F15
No	200.12	11.931	0.152	2	1	552604	8	7.9	99.2833	Contaminating mass	0.713358	0.00383173	0	0	0	0	0	0.000244676	99.2826									F1
No	200.12	11.922	0.161	1	1	585754	8	8	100	Low pattern fit	0	0	0	0	0	0	0	0.000246443	99.9998									F14
No	200.12	11.928	0.159	1	1	519423	8	8	99.9882	Contaminating mass	0.00942051	0.00269219	0	0	0	0	0	0.000246413	99.9876									F5
No	200.153	7.212	0.079	1	1	1883.05	10	0	0	No warnings	100	0	0	0	0	0	0	0	0	0	0							F5
No	200.153	7.235	0.078	1	1	1871.28	10	0	0.0531555	No warnings	99.8937	0	0	0	0	0.106311	0	0	0	0	0							F6
No	200.153	7.217	0.06	1	1	2072.49	10	0	0	No warnings	100	0	0	0	0	0	0	0	0	0	0							F1
No	200.153	7.205	0.054	2	1	1354.44	10	0.2	1.84949	No warnings	96.9175	0	0	0	2.80124e-05	0	3.08246	0	0	0	0							F14
No	200.153	7.204	0.068	1	1	4151.72	10	0	0.0390343	No warnings	99.9219	0	0	0	0	0.0780685	0	0	0	0	0							F13
No	200.153	7.208	0.085	1	1	2295.97	10	0	0	No warnings	100	0	0	0	0	0	0	0	0	0	0							F16
No	200.153	7.207	0.065	1	1	1090.01	10	0	0	No warnings	100	0	0	0	0	0	0	0	0	0	0							F15
No	200.153	7.212	0.064	1	1	2312.27	10	0.5	5.05719	Contaminating mass	89.8856	0	0	0	0	10.1144	0	0	0	0	0							F8
No	200.153	7.185	0.071	1	1	2180.64	10	0	0.061269	No warnings	99.8775	0	0	0	0	0.122538	0	0	0	0	0							F7
No	201.057	11.763	0.079	2	1	5046.93	7	1.2	16.9405	Contaminating mass	55.4126	0.00713154	35.1849	0	0	8.16543	1.22987	0										F8
No	201.057	11.755	0.039	1	1	3675.19	7	0	0.320923	No warnings	99.5089	0	0.0697065	0	0	0.421409	0	0										F1
No	201.057	11.743	0.006	2	1	1894	7	2.5	36.2903	Contaminating mass	20.4948	4.98959	39.9134	3.11164	0	29.0624	2.42812	0										F6
No	201.057	11.759	0.046	1	1	2081	7	0.1	1.20469	No warnings	98.3134	0	0	0	0.000282128	1.68634	0	0										F14
No	201.057	11.779	0.043	1	1	1515.16	7	0.2	2.89554	Low pattern fit	90.2272	0	9.59205	0	0	0	0.180785	0										F15
No	201.057	11.752	0.054	1	1	1674.63	7	0	0	No warnings	100	0	0	0	0	0	0	0										F13
No	201.057	11.777	0.066	1	1	1554.89	7	0.1	1.21929	Low pattern fit	98.2944	0	0	0	0.000257982	1.69818	0.00717929	0										F7
No	201.057	11.746	0.041	1	1	1547.26	7	0.1	0.977349	Low pattern fit	96.5793	0	3.42072	0	0	0	0	0										F16
No	201.057	11.766	0.042	1	1	2605.72	7	0.1	0.93301	No warnings	98.0757	0	1.03021	0	0	0.894129	0	0										F5
No	201.091	5.766	0.068	4	1	35447.1	11	0.4	3.34268	Contaminating mass	93.2443	0	0	1.27087	0	0	5.47524	0	0	0	0	0.00957931						F7
No	201.091	5.787	0.064	4	1	28172	11	0.2	2.07925	Contaminating mass	95.6875	0	0	1.03225	0	0	3.26013	0	0	0	0.00690593	0.0132004						F5
No	201.091	5.762	0.067	6	1	26346.2	11	0.5	4.22493	No warnings	92.2265	0	0	0.886763	0	2.04861	3.70263	0	0	0	1.13551	0						F16
No	201.091	5.778	0.06	4	1	25702.9	11	0.2	1.85396	No warnings	96.5356	0	0	0.146542	0	0	3.30857	0	0	0	0	0.00931731						F15
No	201.091	5.77	0.064	3	1	29072.4	11	0	0.23186	No warnings	99.1856	0	0	0.800956	0	0	0	0	0	0	0	0.0134171						F8
No	201.091	5.77	0.063	4	1	28476	11	0.3	2.43487	No warnings	95.0921	0	0	0.909502	0	0	3.98553	0	0	0	0	0.0129012						F14
No	201.091	5.766	0.066	4	1	26495.4	11	0.5	4.52114	Irregular exchange	90.8742	0.417566	0	0.997715	0	0	7.69882	0	0	0	0	0.0117218						F13
No	201.091	5.765	0.065	3	1	22447.5	11	0.1	0.585071	No warnings	98.9365	0	0	0	4.27894e-06	7.08412e-05	1.05114	0	0	0	0.00657066	0.00571522						F1
No	201.091	5.766	0.067	4	1	24348.6	11	0.2	2.2341	Contaminating mass	95.1405	0	0	1.54137	0	0	3.30977	0	0	0	0	0.00839348						F6
No	201.136	8.92	0.111	2	2	23714.8	10	4.3	42.7947	Contaminating mass	16.7226	0	0	0	0	75.5202	5.85598	0	1.90121	0	0							F7
No	201.136	8.906	0.057	3	2	25206.3	10	4.6	46.2212	Contaminating mass	12.3712	0	0	0	0	76.6212	4.48264	0	6.51938	0	0.00552023							F6
No	201.136	8.895	0.062	2	2	16735.5	10	4.4	43.8546	Irregular exchange	14.4189	0	0	0	0	80.4804	2.33118	0	2.76956	0	0							F14
No	201.136	8.857	0.062	3	2	37642.9	10	3	29.9803	Contaminating mass	42.1069	0	0	0	0	53.3542	1.64147	0	2.89552	0	0.00193924							F5
No	201.136	8.871	0.037	3	2	26190.4	10	4.3	42.7901	Irregular exchange	18.3637	0	0	0	0.000194824	69.1505	8.86831	0	3.6173	0	0							F16
No	201.136	8.861	0.034	2	2	19520.8	10	4.5	44.8461	Irregular exchange	15.2903	0	0	0.000661857	0	76.4044	3.03981e-05	0	8.30457	0	0							F15
No	201.136	8.907	0.056	3	2	18514.8	10	4.2	41.9626	Irregular exchange	21.0289	0.211946	0	0	0	65.584	6.9533	0	6.22183	0	0							F13
No	201.136	8.898	0.034	3	2	29130.9	10	3.7	36.5075	Contaminating mass	31.8859	1.04513	0	0	7.52753e-06	55.7899	2.57598	0	8.70307	0	0							F1
No	201.136	8.893	0.037	3	2	27103.3	10	4.4	43.5531	Contaminating mass	15.6024	0	0	0	0	78.2872	2.39404	0	3.71629	0	0							F8
No	201.137	8.195	0.062	3	2	66780.7	10	0.4	3.98995	Contaminating mass	93.2073	0.144604	0	0	0	0.250028	6.36895	0	0	0	0.0291037							F5
No	201.137	8.195	0.065	4	2	80963.7	10	0.5	4.73105	Contaminating mass	92.8392	0	0	0	0.51487	0.0664923	3.86408	0	2.71002	0	0.00539175							F7
No	201.137	8.201	0.067	3	2	83745.9	10	0.6	5.5231	Irregular exchange	91.3507	0	0	0	2.571e-05	0.148494	6.75891	0	1.74187	0	0							F16
No	201.137	8.197	0.07	4	2	74611.1	10	0.5	4.65138	Contaminating mass	91.1812	0	7.78502e-05	0	3.2345	0	5.56662	0	0	0	0.0175883							F1
No	201.137	8.196	0.063	3	2	97460.6	10	0.2	1.79114	No warnings	97.3172	0.0664361	0	0	0	0.0278741	1.50655	0	1.07638	0	0.00552685							F13
No	201.137	8.197	0.066	3	2	54254.2	10	0.6	5.71584	Irregular exchange	91.3002	0.0110604	0	0	0	0.0348189	6.1319	0	2.51928	0	0.00276477							F14
No	201.137	8.196	0.066	3	2	62914	10	2.3	22.8086	Irregular exchange	55.4502	0	0	0.000178884	3.93952	35.0566	3.69179	0	1.86169	0	0							F15
No	201.137	8.196	0.056	3	2	67380.2	10	0.2	2.21895	Contaminating mass	96.2999	0	0	0	1.54629e-05	0.0300188	3.66543	0	0	0	0.00467712							F6
No	201.137	8.196	0.066	4	2	73508.5	10	0.6	6.37439	Contaminating mass	90.3203	0	0	0	0.662399	0.0304963	5.48092	0	3.50152	0	0.00440814							F8
No	201.137	5.696	0.081	5	1	7390.48	10	6.6	65.6012	Contaminating mass	4.38489	3.69517	0	17.0656	0	0	1.70653e-05	0.000165297	72.5684	2.28574	0							F1
No	201.137	5.641	0.06	5	1	31365.6	10	2.2	22.139	Contaminating mass	68.9247	0.232429	0	5.15973	0	0	5.81843e-06	5.58815e-05	25.4699	0.213232	0							F5
No	201.137	5.627	0.056	5	1	25277.3	10	1.7	17.4945	Contaminating mass	77.493	0.479562	0	0.435712	0	0	4.90735e-06	4.73375e-05	21.167	0.424676	0							F6
No	201.137	5.625	0.057	3	1	38705.3	10	1	10.3239	Irregular exchange	86.8216	0.312564	0	0	0	0	2.01508e-05	0	12.8658	0	0							F15
No	201.137	5.635	0.055	4	1	30261.8	10	1.7	16.6771	Irregular exchange	79.2635	0	0	0	0	0	4.74332e-06	4.61495e-05	19.8579	0.878572	0							F16
No	201.137	5.628	0.064	5	1	35416.8	10	2.1	21.4497	Contaminating mass	72.6192	0	0	0.953029	0	0	5.98686e-06	5.7496e-05	26.2121	0.215587	0							F8
No	201.137	5.626	0.06	6	1	38112.4	10	2.8	28.41	Irregular exchange	63.7678	0.402265	0	0.323412	0	0.441547	0	0	35.065	0	0							F13
No	201.137	5.619	0.061	6	1	45291.9	10	1.8	17.9849	Contaminating mass	76.8125	0	0	1.23501	0	0	4.99531e-06	4.82638e-05	21.4278	0.524611	0							F7
No	201.137	5.628	0.06	5	1	44487.4	10	1.7	16.5802	Irregular exchange	77.683	0.629229	0	0.519827	0	1.90993	0	0	19.258	0	0							F14
No	201.173	9.022	0.07	2	2	7148.16	11	0.6	5.19678	Irregular exchange	80.1424	10.5494	0	0.000212848	7.76305e-05	9.29013	0	0	0.00684394	0	0.0108845	0						F14
No	201.173	9.164	0.112	3	2	62422.7	11	5.2	47.4055	Contaminating mass	20.6248	0.693415	0.00038671	0.0024005	8.23718	31.0207	0	20.5016	0	0	18.9196	0						F1
No	201.173	9.022	0.06	2	2	16718.8	11	0.5	4.24236	Contaminating mass	89.4153	1.56487	0	0.000206629	7.53622e-05	9.01868	0	0	0.000851891	0	0	0						F8
No	201.173	9.027	0.069	3	2	16775.9	11	0.6	5.56979	Irregular exchange	86.235	1.52745	0	0.000251233	1.45452	10.7804	0	0	0.00244026	0	0	0						F16
No	201.173	9.025	0.081	2	2	4971.54	11	0.4	3.54596	Irregular exchange	91.227	1.21474	0	0.000173163	6.31565e-05	7.55801	0	0	0	0	0	0						F15
No	201.173	9.04	0.061	4	2	43924.2	11	2.6	23.3415	Contaminating mass	49.482	0	0	0.00654325	8.79997	35.336	0	6.29927	0	0	0.0762044	0						F5
No	201.173	9.025	0.067	2	2	12625	11	0.3	2.28466	No warnings	91.7462	4.03853	0	9.64477e-05	3.51767e-05	4.20963	0	0	0.00552322	0	0	0						F13
No	201.173	9.027	0.067	2	2	11352.3	11	0.6	5.10599	Contaminating mass	87.0786	2.14925	0	0.000245792	8.9646e-05	10.728	0	0	0.0311384	0	0.0126329	0						F6
No	201.173	9.025	0.066	2	2	12164.3	11	0	0.198628	No warnings	98.0061	1.95565	0	0	0	0	0.0382082	0	0	0	0	0						F7
No	201.209	9.198	0.062	1	1	2239.3	12	0	0	No warnings	100	0	0	0	0	0	0	0	0	0	0	0	0					F7
No	201.209	9.201	0.08	1	1	1161.97	12	0	0	No warnings	100	0	0	0	0	0	0	0	0	0	0	0	0					F14
No	201.209	9.196	0.056	1	1	2072.1	12	0	0	No warnings	100	0	0	0	0	0	0	0	0	0	0	0	0					F8
No	201.209	9.215	0.07	1	1	2351.06	12	0	0	No warnings	100	0	0	0	0	0	0	0	0	0	0	0	0					F16
No	201.209	9.193	0.078	1	1	3084.73	12	0	0	No warnings	100	0	0	0	0	0	0	0	0	0	0	0	0					F6
No	201.209	9.197	0.068	2	1	8228.9	12	0	0	No warnings	100	0	0	0	0	0	0	0	0	0	0	0	0					F1
No	201.209	9.201	0.075	2	1	2135.91	12	0	0	No warnings	100	0	0	0	0	0	0	0	0	0	0	0	0					F5
No	201.209	8.387	0.071	1	1	1036	12	0	0	No warnings	100	0	0	0	0	0	0	0	0	0	0	0	0					F15
No	201.209	8.38	0.072	2	1	10200.5	12	0	0	No warnings	100	0	0	0	0	0	0	0	0	0	0	0	0					F14
No	201.209	8.399	0.077	1	1	7567.19	12	0	0	No warnings	100	0	0	0	0	0	0	0	0	0	0	0	0					F1
No	201.209	8.39	0.074	2	1	8364.55	12	0	0	No warnings	100	0	0	0	0	0	0	0	0	0	0	0	0					F6
No	201.209	8.38	0.073	2	1	6874.73	12	0	0	No warnings	100	0	0	0	0	0	0	0	0	0	0	0	0					F13
No	201.209	8.398	0.069	2	1	7730.89	12	0	0	No warnings	100	0	0	0	0	0	0	0	0	0	0	0	0					F7
No	201.209	8.389	0.071	2	1	5643.55	12	0	0	No warnings	100	0	0	0	0	0	0	0	0	0	0	0	0					F16
No	201.209	8.378	0.075	2	1	11404.9	12	0	0	No warnings	100	0	0	0	0	0	0	0	0	0	0	0	0					F8
No	201.209	8.387	0.07	1	1	11889.1	12	0	0	No warnings	100	0	0	0	0	0	0	0	0	0	0	0	0					F5
No	201.209	7.997	0.064	1	1	3165.83	12	0	0	No warnings	100	0	0	0	0	0	0	0	0	0	0	0	0					F16
No	201.209	7.991	0.063	2	1	6857.59	12	0	0	No warnings	100	0	0	0	0	0	0	0	0	0	0	0	0					F8
No	201.209	7.995	0.065	2	1	6481.51	12	0	0	No warnings	100	0	0	0	0	0	0	0	0	0	0	0	0					F5
No	201.209	7.997	0.068	2	1	5385.38	12	0	0	No warnings	100	0	0	0	0	0	0	0	0	0	0	0	0					F6
No	201.209	7.991	0.065	2	1	7498.45	12	0	0	No warnings	100	0	0	0	0	0	0	0	0	0	0	0	0					F14
No	201.209	8	0.059	2	1	5368.43	12	0	0	No warnings	100	0	0	0	0	0	0	0	0	0	0	0	0					F7
No	201.209	7.991	0.072	1	1	3924.3	12	0	0	No warnings	100	0	0	0	0	0	0	0	0	0	0	0	0					F1
No	201.209	7.992	0.067	2	1	4803.91	12	0	0	No warnings	100	0	0	0	0	0	0	0	0	0	0	0	0					F13
No	201.209	9.698	0.098	2	1	13337	12	0	0	No warnings	100	0	0	0	0	0	0	0	0	0	0	0	0					F6
No	201.209	9.712	0.095	2	1	14881.9	12	0	0	No warnings	100	0	0	0	0	0	0	0	0	0	0	0	0					F14
No	201.209	9.708	0.097	2	1	29167.6	12	0	0	No warnings	100	0	0	0	0	0	0	0	0	0	0	0	0					F1
No	201.209	9.717	0.091	1	1	4073.88	12	0	0	No warnings	100	0	0	0	0	0	0	0	0	0	0	0	0					F15
No	201.209	9.703	0.09	2	1	16355.2	12	0	0	No warnings	100	0	0	0	0	0	0	0	0	0	0	0	0					F5
No	201.209	9.697	0.088	2	1	7486.01	12	0	0	No warnings	100	0	0	0	0	0	0	0	0	0	0	0	0					F13
No	201.209	9.695	0.095	2	1	32288.4	12	0	0	No warnings	100	0	0	0	0	0	0	0	0	0	0	0	0					F16
No	201.209	9.717	0.097	1	1	8542.42	12	0	0	No warnings	100	0	0	0	0	0	0	0	0	0	0	0	0					F8
No	201.209	9.701	0.091	2	1	16792.9	12	0	0	No warnings	100	0	0	0	0	0	0	0	0	0	0	0	0					F7
No	201.209	7.627	0.063	1	1	3116.37	12	0	0	No warnings	100	0	0	0	0	0	0	0	0	0	0	0	0					F6
No	201.209	7.617	0.057	1	1	3990.42	12	0	0	No warnings	100	0	0	0	0	0	0	0	0	0	0	0	0					F14
No	201.209	7.637	0.054	1	1	2920.72	12	0	0	No warnings	100	0	0	0	0	0	0	0	0	0	0	0	0					F7
No	201.209	7.623	0.076	1	1	1847.69	12	0	0	No warnings	100	0	0	0	0	0	0	0	0	0	0	0	0					F16
No	201.209	7.624	0.069	1	1	2813.48	12	0	0	No warnings	100	0	0	0	0	0	0	0	0	0	0	0	0					F13
No	201.209	7.624	0.068	1	1	1964.79	12	0	0	No warnings	100	0	0	0	0	0	0	0	0	0	0	0	0					F1
No	201.209	7.635	0.059	1	1	4086.75	12	0	0	No warnings	100	0	0	0	0	0	0	0	0	0	0	0	0					F5
No	201.209	7.629	0.068	1	1	4274.27	12	0	0	No warnings	100	0	0	0	0	0	0	0	0	0	0	0	0					F8
No	201.97	10.41	0.077	2	1	2725.83	7	0.6	8.30199	Irregular exchange	83.0852	0	0	13.23	0	3.68479	0	0										F14
No	201.97	10.403	0.074	2	1	1635.31	7	0.3	4.58984	Contaminating mass	93.5742	0	0	0.000139776	0	6.42569	0	0										F5
No	201.97	10.408	0.075	2	1	1680.46	7	0.5	7.37257	Contaminating mass	89.6783	0	0	0.00022452	0	10.3215	0	0										F8
No	201.97	10.401	0.089	2	1	2093.51	7	0.3	3.95459	Irregular exchange	94.4635	0	0	0.000120431	0	5.53635	0	0										F16
No	201.97	10.401	0.064	2	1	1613.53	7	0	0	No warnings	100	0	0	0	0	0	0	0										F1
No	201.97	10.455	0.236	1	1	5417.03	7	2	28.0353	Contaminating mass	38.5342	0	0	55.5411	0	5.92471	0	0										F6
No	201.97	10.394	0.081	2	1	2277.25	7	0.2	3.05024	Contaminating mass	95.7296	0	0	9.28905e-05	0	4.27029	0	0										F7
No	201.97	10.425	0.081	2	1	1927.14	7	0.2	2.88606	No warnings	95.9595	0	0	8.78904e-05	0	4.04043	0	0										F15
No	201.97	10.397	0.041	2	1	2283.36	7	0.6	8.5785	Irregular exchange	79.9835	0	0	20.0165	0	0	0	0										F13
No	201.996	6.744	0.116	2	2	2944.91	3	2.5	82.1498	Contaminating mass	16.3083	2.31275	0	81.3789														F6
No	201.996	6.85	0.06	2	2	20134.9	3	0.9	29.4636	Contaminating mass	21.9721	71.424	2.84492	3.759														F8
No	201.996	6.956	0.079	2	1	2217.76	3	1.6	53.6273	Low pattern fit	0	39.118	60.882	0														F16
No	201.996	6.854	0.062	2	2	12103.1	3	1.3	42.501	Contaminating mass	46.0956	17.1051	0	36.7993														F5
No	201.996	6.801	0.081	1	2	1407.5	3	1.4	46.0558	Contaminating mass	0	80.9163	0	19.0837														F1
No	201.996	6.85	0.057	2	2	2843.58	3	0	0	No warnings	100	0	0	0														F7
No	202.006	3.616	0.042	3	2	9445.89	4	0.6	14.6353	Contaminating mass	84.6521	0.219762	3.25114e-05	2.19106	12.9371													F1
No	202.006	3.493	0.101	3	2	2702.24	4	0.7	17.5048	Irregular exchange	79.5608	0	0	11.7376	8.70161													F13
No	202.006	3.558	0.104	1	2	2795.01	4	0.2	5.06062	Contaminating mass	93.2523	0.00025535	0	6.74741	0													F6
No	202.006	3.52	0.115	2	2	2463.15	4	0.1	3.1689	No warnings	95.7873	5.44818e-05	0	4.17488	0.0377233													F16
No	202.006	3.506	0.085	2	2	1736.13	4	0.6	14.1508	Irregular exchange	81.1322	0	0	18.8678	0													F15
No	202.006	3.543	0.075	2	2	2511.39	4	0.2	5.60292	Irregular exchange	92.5294	0	0	7.47056	0													F14
No	202.006	3.537	0.081	3	2	6036.53	4	0.1	2.83398	Contaminating mass	96.7813	0	0	1.53877	1.6799													F5
No	202.006	3.546	0.077	1	2	3701.83	4	0.6	15.0386	Contaminating mass	80.8368	0	0	16.4982	2.66493													F8
No	202.006	3.533	0.081	1	2	3918.97	4	0.3	8.163	Contaminating mass	89.1618	0.000402745	0	10.6995	0.138294													F7
No	202.022	7.425	0.071	2	1	3878.89	6	4.8	79.7144	Low pattern fit	4.19152	0	0	0	0.755982	95.0525	0											F15
No	202.022	7.408	0.07	1	1	9827.44	6	5	82.8588	Low pattern fit	0	0	0	0	2.84731	97.1527	0											F14
No	202.022	7.433	0.071	1	1	6213.3	6	0.1	0.900199	Low pattern fit	98.6497	0	0	0	1.3503	0	0											F8
No	202.022	7.227	0.116	2	1	11538.5	6	4.1	67.8526	Contaminating mass	0	0.88488	0	0	89.345	9.77014	0											F1
No	202.022	7.235	0.033	1	1	22117.6	6	1	17.1248	Contaminating mass	75.2355	0	0	0	21.0738	3.69079	0											F6
No	202.022	7.415	0.071	2	1	4815.48	6	4.9	81.6647	Low pattern fit	1.83141	0	0	0	0.854911	97.3137	0											F13
No	202.022	7.495	0.05	1	1	14779.7	6	0.3	4.92932	Contaminating mass	93.3609	0	0	0	3.61954	3.01956	0											F7
No	202.022	7.416	0.032	2	1	4241.71	6	4.8	80.2053	Low pattern fit	3.24759	0	0	0	2.53027	94.2221	0											F16
No	202.022	7.428	0.069	1	1	4490.09	6	0.3	5.7587	Contaminating mass	92.9689	0	0	0	0.603373	6.42774	0											F5
No	202.027	2.393	0.057	3	1	22038.5	4	1.7	41.4566	Irregular exchange	47.7166	0.970686	0	40.3953	10.9174													F13
No	202.027	2.64	0.111	2	1	45516.9	4	0.6	14.4733	Irregular exchange	81.3507	0	0.0223056	16.6592	1.96771													F16
No	202.027	2.42	0.071	1	1	15371.9	4	1	25.54	Irregular exchange	74.4487	0	0.0227256	0	25.5286													F14
No	202.027	2.452	0.069	2	1	42637.2	4	0.7	18.7459	Irregular exchange	77.1728	0.000171512	0.0165839	16.2913	6.51914													F15
No	202.027	2.631	0.088	2	1	27711.8	4	0.5	13.3456	Contaminating mass	82.2009	0.000140423	0.0145113	17.7845	0													F6
No	202.027	2.655	0.095	2	1	8879.54	4	0.7	17.9257	Contaminating mass	76.099	0	0	23.901	0													F7
No	202.027	2.416	0.095	2	1	15167.1	4	0.7	17.3754	Contaminating mass	76.8328	0	0	23.1672	0													F8
No	202.027	2.313	1.892	2	1	52727.1	4	0.2	4.81144	Contaminating mass	93.3382	0.369901	0	6.29195	0													F1
No	202.027	2.689	0.248	2	1	7310.8	4	0.6	15.0326	Contaminating mass	79.9566	0	0	20.0434	0													F5
No	202.048	2.848	0.056	1	1	1446.66	8	8	100	Contaminating mass	0	0	0	0	0	0	0	0	100									F5
No	202.063	10.474	0.15	3	1	1399.91	12	3.8	31.4845	Irregular exchange	60.9989	0	0	0	0	0	0.00022566	0	17.0656	0	0	21.9353	0					F13
No	202.063	10.478	0.067	2	1	6001.34	12	0	0	No warnings	100	0	0	0	0	0	0	0	0	0	0	0	0					F14
No	202.063	10.482	0.069	3	1	6416.97	12	2.9	24.4763	Contaminating mass	63.2854	0	0	0	0	0	0.000485475	0	36.7141	0	0	0	0					F7
No	202.063	10.625	0.328	2	1	7379.18	12	6.1	50.9154	Contaminating mass	0	0.00175399	0.0159677	47.2974	0	0	0.000486929	0	36.824	1.81036e-05	0	15.8604	0					F1
No	202.063	10.482	0.067	3	1	6161.44	12	0.6	4.99563	Irregular exchange	92.5065	0	0	0	0	0	9.90857e-05	0	7.49337	0	0	0	0					F15
No	202.063	10.384	0.017	3	1	3172.02	12	3.2	26.9931	Contaminating mass	10.1153	0.00168319	0.0153231	79.0114	0	0	0.000143553	0	10.8562	0	0	0	0					F5
No	202.063	10.607	0.018	2	1	2867.28	12	3.3	27.8507	Contaminating mass	15.0806	0.000837799	0.00762703	69.0191	0	0	0.000210137	0	15.8917	0	0	0	0					F6
No	202.074	8.012	0.099	2	2	7482.36	5	2.6	51.1468	Irregular exchange	8.30906	0	52.9931	21.8706	5.30472e-05	16.8271												F16
No	202.074	8.156	0.019	2	2	10598.1	5	1.8	35.6072	Irregular exchange	20.8102	0	72.6377	5.8573e-06	3.4966e-05	6.55211												F14
No	202.074	8.243	0.079	2	2	5889.26	5	2.7	54.2892	Contaminating mass	42.3862	0	3.43406	3.1603	0.00024365	51.0192												F8
No	202.074	8.231	0.077	3	2	5708.69	5	2.6	51.9858	Irregular exchange	42.4463	0	3.89519	8.07695	0.000125183	45.5815												F13
No	202.074	8.21	0.071	2	2	3941.68	5	0.8	15.6748	Contaminating mass	82.1076	0	3.69593	0	0	14.1965												F5
No	202.074	8.196	0.068	2	2	4106.43	5	1.2	24.3447	Contaminating mass	71.5703	0	0	10.2124	4.27276e-05	18.2172												F6
No	202.074	8.211	0.066	1	2	4224.52	5	0.2	3.73198	Contaminating mass	91.9092	0	7.26474	0	0	0.826087												F1
No	202.074	8.167	0.032	2	2	3097.39	5	3.4	67.2089	Irregular exchange	25.8088	0	11.6371	0	0	62.5541												F15
No	202.074	8.203	0.073	3	2	5271.28	5	1.1	21.7358	Contaminating mass	71.6083	0	4.07935	10.5207	0	13.7917												F7
No	202.084	6.243	0.168	3	2	54429.2	4	1.1	27.7289	Contaminating mass	61.7044	0	3.97129	34.3244	0													F1
No	202.084	6.16	0.035	3	2	37965.7	4	0.3	7.35386	Irregular exchange	85.8065	0	13.1733	1.01196	0.0082473													F16
No	202.084	6.114	0.12	2	2	32104.2	4	1.8	46.2097	Irregular exchange	38.3848	0.000123156	0.00668647	61.6084	0													F15
No	202.084	6.233	0.276	2	2	59653.8	4	1	25.5159	Irregular exchange	65.9787	0	6.60263e-05	34.0212	0													F14
No	202.084	6.163	0.087	2	2	27592.9	4	2.5	61.967	Contaminating mass	17.2775	0	0.299613	82.4229	0													F7
No	202.084	6.127	0.023	3	2	14109.3	4	1.8	46.1934	Contaminating mass	16.1487	0.00185175	66.7766	17.0728	0													F8
No	202.084	6.217	0.17	3	2	54654.9	4	1.1	27.1319	Contaminating mass	63.6481	0	0.528162	35.8238	0													F6
No	202.084	6.219	0.078	2	2	52811.5	4	1.1	27.9456	Contaminating mass	62.7392	0	0	37.2608	0													F5
No	202.084	6.121	0.028	3	2	16330.3	4	2.6	65.3237	No warnings	0	1.67892	35.3475	62.9736	0													F13
No	202.084	10.199	0.081	1	1	4765.34	9	0	0.316583	No warnings	99.6438	0	0	0	0	0	0	0	0.356156	0								F6
No	202.084	10.197	0.081	1	1	5877.69	9	0.1	0.6747	Low pattern fit	99.241	0	0	0	0	0	0	0	0.759038	0								F14
No	202.084	10.226	0.07	1	1	5564.05	9	0	0.472445	No warnings	99.4685	0	0	0	0	0	0	0	0.531501	0								F8
No	202.084	10.181	0.102	1	1	4289.13	9	0	0.326295	No warnings	99.6329	0	0	0	0	0	0	0	0.367082	0								F15
No	202.084	10.201	0.073	1	1	6798.59	9	0	0.520561	No warnings	99.4144	0	0	0	0	0	0	0	0.585631	0								F7
No	202.084	10.2	0.073	1	1	5406.64	9	0.7	8.07226	Irregular exchange	90.9187	0	0	0	0	0	0	0	9.0813	0								F13
No	202.084	10.201	0.075	1	1	4356.6	9	0	0.101317	No warnings	99.886	0	0	0	0	0	0	0	0.113982	0								F5
No	202.084	10.216	0.059	2	1	3904.18	9	0	0.39269	No warnings	98.8219	0	0	1.17807	0	0	0	0	0	0								F1
No	202.084	10.206	0.067	2	1	5523.41	9	0.5	5.77296	Irregular exchange	74.4321	0	25.431	0	0	0	0	0	0.136821	0								F16
No	202.096	2.831	0.096	6	2	52953.4	8	1.8	21.9707	Irregular exchange	35.1021	1.55717	44.7828	5.31587	0.0995139	12.218	0.0807417	0.0274176	0.816404									F15
No	202.096	2.848	0.115	2	2	38244.7	8	1.2	14.7249	Contaminating mass	51.9881	0	41.8685	0.0939382	0	4.37699	0	1.48427	0.188195									F8
No	202.096	2.813	0.14	6	2	25303.8	8	0.8	9.44481	Irregular exchange	70.1572	1.52885	18.404	5.78517	0.771495	3.34646	0	0.00684831	0									F13
No	202.096	2.825	0.11	3	2	57952.6	8	2.2	27.7519	Contaminating mass	28.3051	0	47.8607	4.33161	0	11.885	0	7.06628	0.551289									F7
No	202.096	2.819	0.107	3	2	14028.5	8	0.2	3.04322	Contaminating mass	93.0145	0	0	6.30771	0	0	0	0	0.677824									F6
No	202.096	2.824	0.109	7	2	54729.3	8	2.4	30.313	Irregular exchange	24.1833	4.03157	38.5607	3.74971	0.26289	28.2135	0.00190669	0	0.996415									F16
No	202.096	2.823	0.015	3	2	10295.6	8	4.6	57.0349	Contaminating mass	0.000676803	0	16.024	0	0	81.7979	0	2.17742	0									F1
No	202.096	2.819	0.115	3	2	19927.9	8	1.7	21.609	Contaminating mass	64.14	0	0	3.59958	0	31.8751	0	0.385407	0									F5
No	202.096	2.838	0.112	6	2	37519.1	8	1.7	20.8445	Irregular exchange	52.1593	1.5836	28.5933	0.412251	0.493432	9.33628	0	1.28095	6.14086									F14
No	202.099	14.35	0.067	4	1	3966.23	13	1.5	11.5837	Irregular exchange	83.3286	0	0	0	4.87333e-05	0.000361441	2.69801	0	6.43473	0	0	7.53824	0	0				F16
No	202.099	14.348	0.048	5	1	8825.93	13	3.2	24.7321	Irregular exchange	47.4778	0	0	28.11	0	0	3.45245	0	4.69464	1.43851e-05	0	16.2651	0	0				F14
No	202.099	14.341	0.058	2	1	4929.61	13	2.5	19.4252	Contaminating mass	77.043	0	0	0	0	0	0	0	0	5.17168e-05	0	22.957	0	0				F8
No	202.099	14.331	0.063	2	1	2917.26	13	0.2	1.71115	Contaminating mass	97.9797	0	0	0	0	0	0	0	0	4.72664e-06	0	2.00931	0	0.010961				F5
No	202.099	14.363	0.069	2	1	3800.25	13	0.6	4.35176	Irregular exchange	81.3244	0	0	18.621	0	0	0	0	0	0	0	0	0	0.054608				F13
No	202.099	14.383	0.064	4	1	6067.18	13	3.1	23.487	Irregular exchange	68.2131	0	0	2.70335	0	0	0.000107925	0	7.56587	0	0	21.5176	0	0				F15
No	202.099	14.332	0.076	2	1	3525.08	13	1.3	10.3249	Contaminating mass	87.7979	0	0	0	0	0	0	0	0	2.74885e-05	0	12.2021	0	0				F7
No	202.099	14.343	0.044	1	1	3242.34	13	0.5	3.91883	Contaminating mass	93.6319	0	0	0	0	0	9.08385e-05	0	6.36803	0	0	0	0	0				F6
No	202.099	14.351	0.026	2	1	2636.88	13	1.5	11.4186	Contaminating mass	86.5053	0	0	0	0	0	0	0	0	3.04003e-05	0	13.4946	0	0				F1
No	202.099	12.323	0.1	3	1	8922.18	13	0.8	6.3047	Contaminating mass	75.3952	0	0	23.7901	0	0	0	0	0	0	0	0	0	0.814676				F1
No	202.099	12.331	0.085	4	1	8307.54	13	1.1	8.41156	Irregular exchange	82.2513	0	0	10.7421	0	0	0	0	0	1.6202e-05	0	6.98039	0	0.0261161				F15
No	202.099	12.34	0.084	4	1	8218.57	13	1.2	9.05164	Irregular exchange	73.9048	0	0	21.1719	0	0	0	0	0	1.10917e-05	0	4.92316	0	4.95234e-05				F14
No	202.099	12.33	0.092	1	1	6996.98	13	0.6	4.2413	Contaminating mass	81.8535	0.000361708	0.0114211	18.0638	0	0	0	0	0	0	0	0	0	0.0709428				F6
No	202.099	12.359	0.088	4	1	8821.47	13	1.4	10.6754	Contaminating mass	71.298	0	0	22.1177	0	0	0	0	0	1.48329e-05	0	6.58431	0	0				F5
No	202.099	12.334	0.088	2	1	6263.08	13	0.3	2.45584	Contaminating mass	89.3557	0.000213002	0.00672562	10.6374	0	0	0	0	0	0	0	0	0	0				F8
No	202.099	12.34	0.085	3	1	5960.52	13	0.8	6.3168	Contaminating mass	92.544	0	0	0	0	0	0	0	0	1.76134e-05	0	7.40499	0	0.0510291				F7
No	202.099	12.332	0.081	4	1	6668.34	13	0.5	4.19822	Irregular exchange	89.6521	0	0	7.40968	0	0	0	0	0	6.84088e-06	0	2.92432	0	0.0138607				F16
No	202.099	12.346	0.084	4	1	7006.46	13	1	7.52581	Irregular exchange	78.9718	0	0	16.6889	0	0	0	0	0	1.00731e-05	0	4.32061	0	0.01861				F13
No	202.121	10.161	0.066	3	2	8050.53	10	0.9	9.09035	Irregular exchange	77.5144	0	0	0.000200319	21.611	0.852663	0	0	0	0.0217344	0							F14
No	202.121	10.175	0.072	2	2	6028.62	10	1.2	12.2053	Irregular exchange	69.5235	0	0	0	30.4473	0	0	0	0	0.0292753	0							F16
No	202.121	10.168	0.062	4	2	8763.59	10	1.7	17.4805	Contaminating mass	56.534	0	0	0.000349126	42.6978	0.724289	0	0	0	0.043519	0							F7
No	202.121	10.174	0.065	5	2	7168.65	10	2.4	23.73	Contaminating mass	42.2116	0	0	4.74995	48.3374	2.66672	0	0	1.94164	0.0926421	0							F6
No	202.121	10.169	0.055	5	2	15141.7	10	1.8	18.0251	Irregular exchange	55.1529	0	0.549695	0	42.3354	1.96199	0	0	0	0	0							F13
No	202.121	10.147	0.068	1	2	3063.17	10	0	0.0626049	No warnings	99.374	0.626049	0	0	0	0	0	0	0	0	0							F15
No	202.121	10.154	0.07	4	2	9127.51	10	1.1	11.4369	Contaminating mass	66.4302	0	0	20.4338	12.8272	0.255151	0	0	0	0.0536836	0							F1
No	202.121	10.179	0.06	4	2	10621.6	10	2.9	29.2513	Contaminating mass	27.2522	0	0.633959	0	69.3236	2.79022	0	0	0	0	0							F8
No	202.121	10.159	0.073	5	2	22253.6	10	0.9	9.19587	Contaminating mass	76.4896	0	0	3.43453	18.786	1.27314	0	0.00247825	0	0.0142279	0							F5
No	202.121	9.285	0.078	5	3	44505	10	4.8	47.789	Contaminating mass	17.3107	0.0322421	0.00213536	15.6183	38.5685	1.39795e-05	0	2.65216	0	0	25.8159							F6
No	202.121	9.28	0.071	2	3	12037.7	10	0	0.00597886	No warnings	99.9926	0	0	0	0	0	0	0.00476117	0	0	0.00264604							F14
No	202.121	9.274	0.073	3	3	59601.2	10	4.2	41.5492	Contaminating mass	18.9091	0	0.00275075	17.6781	44.7106	0	0	1.12811	0	0	17.5713							F5
No	202.121	9.283	0.065	2	3	10393.5	10	1.4	13.5488	Contaminating mass	86.4482	0	0	0	0	0	0	0	0	0.0300253	13.5218							F8
No	202.121	9.273	0.072	2	3	27679.7	10	4.8	47.7595	Contaminating mass	27.2524	0.00174717	0.000198871	30.0007	4.74704	4.06913e-05	0	3.79193	0	0.000774735	34.2051							F7
No	202.121	9.279	0.064	2	3	11782.6	10	2.5	24.7571	Irregular exchange	74.1435	0	0	0	0	3.93263e-05	0	3.66473	0	0	22.1918							F13
No	202.121	9.297	0.072	3	3	19522.8	10	4.1	40.5212	Contaminating mass	37.2259	0	0.000488692	4.08213	11.665	0.000413616	0	41.3048	0	0.0438227	5.67742							F1
No	202.121	9.276	0.078	1	3	7514.32	10	1.5	15.304	Irregular exchange	82.6598	0	0	0	0	7.28331e-05	0	6.78714	0	0	10.553							F16
No	202.121	9.272	0.074	1	3	8874.23	10	1.8	17.8119	Irregular exchange	82.1866	0	0	0	0	0	0	0	0	0.014359	17.799							F15
No	202.132	2.396	0.493	1	1	50431.2	9	0.6	6.49056	Contaminating mass	88.3208	0	0	0	0	11.6602	0.018981	0	0	0								F1
No	202.132	2.756	0.1	5	1	4430.18	9	4.3	47.3335	Irregular exchange	27.3591	0	0	3.31104e-06	0.000119859	36.0695	13.9961	20.7501	0	1.8251								F13
No	202.132	2.766	0.077	1	1	3322.88	9	0	0	No warnings	100	0	0	0	0	0	0	0	0	0								F8
No	202.132	2.784	0.09	3	1	2669.96	9	5.3	58.9362	No warnings	0.0564413	0	0	1.13256e-05	0.000248001	79.8835	9.41175	10.648	0	0								F16
No	202.132	2.758	0.021	3	1	7041.02	9	4.2	46.4215	Irregular exchange	24.3975	0	0	4.19238e-05	0	50.6032	10.2177	14.7816	0	0								F15
No	202.132	2.784	0.079	1	1	6006.5	9	0	0.155193	No warnings	99.7257	0	0	0	0	0.249047	0.0252507	0	0	0								F7
No	202.132	2.4	1	1	1	97193.2	9	0.9	9.96826	Contaminating mass	82.0585	0	0	1.40729e-06	0	17.9345	0.00694222	0	0	0								F5
No	202.132	2.791	0.088	1	1	7845.53	9	0.1	1.40239	Contaminating mass	97.672	0	0	0	0	1.34631	0.981668	0	0	0								F6
No	202.132	2.791	0.068	5	1	7905.75	9	3.3	36.4457	Irregular exchange	41.5061	0	0	1.6364	0	33.1409	8.61831	15.0983	0	0								F14
No	202.136	12.032	0.065	4	1	39716.7	14	11.4	81.5988	Contaminating mass	5.78785	1.42976e-05	0.00125028	3.98844	0	0	1.35394e-05	0.000373932	19.1164	0.867866	0	4.29294	0.389821	7.19802e-06	65.555			F7
No	202.136	11.98	0.153	6	1	22917.6	14	10.2	72.6191	Contaminating mass	8.51774	0	0	10.7058	0	0	0	1.28535e-05	18.804	1.87836	0	8.03453	0	0	52.0595			F8
No	202.136	12.03	0.079	7	1	111837	14	12.2	87.2003	Contaminating mass	3.21884	0	0	5.86408	0	0	2.62986e-06	7.33404e-05	7.92508	0.126856	0	6.83622	0.466896	0	75.5619			F5
No	202.136	11.788	0.115	3	1	4817.37	14	6.8	48.3804	Contaminating mass	11.048	0	0	26.8082	0	0	0.000139992	0.00378828	28.8885	8.58697e-05	0	33.2513	0	0	0			F1
No	202.136	11.867	0.178	7	1	18037.8	14	10.7	76.0904	Irregular exchange	12.871	0	0	6.92919	0	0	2.25202e-05	0.000613531	8.79282	0	0	7.8255	1.04051	0	62.5403			F16
No	202.136	12.02	0.073	7	1	42305.5	14	11.5	82.1048	Irregular exchange	3.95996	0	0	3.91217	0	0	0	9.99187e-06	20.7729	1.18437	0	6.83943	0.491291	0	62.8399			F13
No	202.136	11.906	0.065	3	1	3642.4	14	3.8	27.3807	Contaminating mass	39.4717	0	0	35.31	0	0	0	0	0	6.51246e-05	0	25.2182	0	0	0			F6
No	202.136	11.782	0.037	6	1	9926.31	14	9.7	69.2094	Irregular exchange	17.4311	0	0	8.19967	0	0	4.05035e-05	0.00109605	8.35824	0	3.65256e-06	14.9737	0.879686	0	50.1565			F15
No	202.136	12.115	0.071	7	1	71002.7	14	12.1	86.2416	Irregular exchange	3.33071	1.09026e-05	0.000953401	2.75604	0	0	8.62441e-06	0.000241965	15.177	0.998839	5.11894e-07	6.19923	0.501795	0	71.0352			F14
No	202.136	10.912	0.061	5	1	8407.83	14	9.9	70.5442	Contaminating mass	21.4931	0	0	6.71749	0	0	0	0	0	0	1.01897e-05	10.4614	3.10092	0	58.2271			F8
No	202.136	10.895	0.07	8	1	56659.4	14	10.3	73.9182	Contaminating mass	6.35996	0	0	18.7526	0	0	0	1.566e-05	6.46441	3.04983	0	4.06507	1.79781	0	59.5103			F5
No	202.136	10.578	0.197	4	1	142741	14	12.8	91.3576	Contaminating mass	1.71932	0	0	3.79766	0	0	1.12265e-05	0.000311017	7.15455	0.516554	1.22972e-06	2.48005	1.09834	0	83.2332			F1
No	202.136	10.738	0.311	7	1	147349	14	13.4	95.6623	Contaminating mass	1.51735	0	0	0.928531	0	0	8.15528e-07	2.44333e-05	2.47855	0.400017	1.91368e-07	3.71969	0.620326	0	90.3355			F6
No	202.136	10.854	0.068	6	1	7045.48	14	5.5	39.2141	Irregular exchange	40.1426	0	0	6.84743	0	0	0	0.000131401	0.00160927	28.0724	0	23.4389	1.49681	0	0			F14
No	202.136	10.751	0.02	6	1	18832.8	14	8.3	58.9329	Irregular exchange	14.5928	2.09154e-05	0.00182898	4.09022	0	0	3.34075e-05	0.00094838	31.1808	8.36406	1.31587e-06	29.9562	3.42226	0	8.39076			F16
No	202.136	10.767	0.046	3	1	16289.4	14	7.9	56.1791	Contaminating mass	20.453	0.0455829	0	0.980568	0	0	0.000235513	0.00638486	48.6002	2.50968	0	2.58953	1.90356	0	22.9113			F7
No	202.136	10.865	0.068	3	1	5731.59	14	5.8	41.2508	Irregular exchange	42.4708	0	0	0	0	0	9.66461e-05	0.00261531	19.9437	1.91132e-05	3.47696e-06	33.0512	4.53154	0	0			F15
No	202.136	10.868	0.035	3	1	5214.77	14	8	56.8631	Irregular exchange	43.1369	0	0	0	0	0	0	0	0	0	0	0	1.01672e-06	6.24364e-06	56.8631			F13
No	202.193	11.144	0.063	2	1	1838.85	12	0	0	No warnings	100	0	0	0	0	0	0	0	0	0	0	0	0					F6
No	202.193	11.154	0.08	2	1	1877.08	12	0	0	No warnings	100	0	0	0	0	0	0	0	0	0	0	0	0					F13
No	202.193	11.144	0.067	1	1	2227.99	12	0	0	No warnings	100	0	0	0	0	0	0	0	0	0	0	0	0					F7
No	202.193	11.146	0.059	1	1	1713.68	12	0	0	No warnings	100	0	0	0	0	0	0	0	0	0	0	0	0					F1
No	202.193	11.144	0.059	1	1	1704.56	12	0	0	No warnings	100	0	0	0	0	0	0	0	0	0	0	0	0					F5
No	202.193	11.145	0.069	2	1	2106.15	12	0	0	No warnings	100	0	0	0	0	0	0	0	0	0	0	0	0					F16
No	202.193	11.147	0.063	1	1	1619.73	12	0	0	No warnings	100	0	0	0	0	0	0	0	0	0	0	0	0					F15
No	202.193	11.146	0.06	2	1	1651.87	12	0	0	No warnings	100	0	0	0	0	0	0	0	0	0	0	0	0					F14
No	202.193	11.156	0.06	1	1	2206.31	12	0	0	No warnings	100	0	0	0	0	0	0	0	0	0	0	0	0					F8
No	203.02	2.642	0.074	1	1	2437.03	4	0	0	No warnings	100	0	0	0	0													F8
No	203.02	2.64	0.092	1	1	2277.78	4	0	0	No warnings	100	0	0	0	0													F16
No	203.02	2.611	0.098	1	1	1066.66	4	0	0	No warnings	100	0	0	0	0													F13
No	203.02	2.648	0.086	1	1	1607.85	4	0	0	No warnings	100	0	0	0	0													F6
No	203.02	2.63	0.068	1	1	2977.26	4	0	0	No warnings	100	0	0	0	0													F7
No	203.037	2.24	0.137	1	1	3096.13	6	1	16.6667	Contaminating mass	0	100	0	0	0	0	0											F7
No	203.037	2.27	0.065	1	1	16546.5	6	0	0.172922	No warnings	99.827	0	0	0	0	0.000282168	0.172687											F8
No	203.037	2.23	0.205	1	1	1825.06	6	1	16.6667	Contaminating mass	0	100	0	0	0	0	0											F1
No	203.037	2.151	0.024	1	1	10486.3	6	1.2	20.4671	Low pattern fit	0	95.4163	0	0	0	0.116014	4.46772											F14
No	203.037	2.255	0.072	2	1	5411.59	6	4.4	74.1434	Low pattern fit	0	30.1997	0	0	2.07057	0	67.7298											F16
No	203.037	2.281	0.015	2	1	2208.31	6	1.9	31.2928	Low pattern fit	0	80.5145	0	0	4.83528	0	14.6502											F13
No	203.037	2.224	0.022	2	1	3171.43	6	1.8	29.5446	Contaminating mass	0	84.5464	0	0	0	0	15.4536											F6
No	203.037	2.233	0.016	2	1	3137.2	6	1.5	24.8082	Low pattern fit	0	90.2302	0	0	0	0	9.7698											F15
No	203.037	2.277	0.047	1	1	18863	6	3.7	61.1852	Contaminating mass	0	10.963	0	0	89.037	0	0											F5
No	203.043	2.126	0.056	2	2	7020.49	7	0.4	6.20418	Irregular exchange	91.3142	0	0	0	0	8.68585	0	0										F16
No	203.043	2.172	0.11	1	2	3133.46	7	0.1	1.66019	Contaminating mass	97.9347	0	0	0	0	0.770382	1.2949	0										F1
No	203.043	2.16	0.068	3	2	13291.8	7	1.2	16.6029	Irregular exchange	72.1801	0	0	0.000355882	24.0319	3.21089	0	0.576753										F13
No	203.043	2.129	0.052	3	2	7411.09	7	0.3	3.73401	Irregular exchange	94.6089	0	0	0.416168	0	4.96735	0	0.00754459										F14
No	203.043	2.149	0.063	1	2	7934.23	7	0.3	4.31506	Contaminating mass	92.4673	0	0.000128286	0	7.45763	0.0749216	0	0										F5
No	203.043	2.133	0.059	2	2	8868.21	7	0.4	6.23963	Irregular exchange	90.9485	0	0.53033	0	0	8.51582	0	0.00538082										F15
No	203.043	2.13	0.087	2	2	11440.2	7	0.5	6.61331	Contaminating mass	88.4299	0	0	0	11.5575	0.0126158	0	0										F7
No	203.043	2.145	0.076	1	2	6028.47	7	0.1	1.75812	Contaminating mass	96.9508	0	5.05583e-05	0	2.93909	0.110079	0	0										F6
No	203.043	2.15	0.073	2	2	9117.98	7	0.4	6.2263	Contaminating mass	90.2769	0	8.65442e-05	0	5.03104	4.69195	0	0										F8
No	203.058	7.997	0.064	5	2	158096	11	0.3	3.01119	Contaminating mass	94.3373	0	0	0.744047	0	3.02596	0	0	1.68599	0	0	0.206655						F5
No	203.058	7.995	0.067	6	2	155922	11	0.5	4.13076	No warnings	79.5324	15.9244	0	0.239547	0	2.53245	0	0	1.11669	0	0	0.654503						F13
No	203.058	7.992	0.063	5	2	81219.4	11	0.8	6.8187	Irregular exchange	89.0916	0	0	0.787931	0	3.53606	0	0	5.82235	0	0	0.762072						F16
No	203.058	7.996	0.06	4	2	133837	11	0.3	2.91686	Contaminating mass	95.1015	0	0	0.787043	0	1.49343	1.21753e-05	0	2.18042	0	0	0.437614						F8
No	203.058	7.993	0.064	4	2	75521.1	11	1	9.05758	Contaminating mass	87.5335	0	0	1.85568	0	2.44838	1.32357e-05	0	2.65399	0	0	5.5084						F6
No	203.058	7.995	0.065	6	2	178294	11	0.5	4.83083	Irregular exchange	80.3126	12.5911	0	0.696526	0	4.94181	0	0	0.76272	0	0	0.695237						F14
No	203.058	7.992	0.062	6	2	177130	11	0.3	3.098	Contaminating mass	94.1819	0	0	0.951692	0	3.05503	0.000762178	0	1.32462	0	0	0.486016						F7
No	203.058	7.966	0.078	4	2	17995.3	11	1.6	14.1052	Contaminating mass	71.7498	0	0	6.14859	0	15.2472	1.13877	0	2.94176	7.82985e-07	0.40437	2.36949						F1
No	203.058	7.998	0.065	6	2	182850	11	0.6	5.03283	Irregular exchange	82.706	9.51189	0	0.143901	0	5.77169	0	0	1.32432	0	0	0.54223						F15
No	203.058	6.056	0.06	5	2	33796.8	11	1.2	10.6756	Irregular exchange	79.3572	0	0.236786	5.82869	0	6.18864	0	0	7.91575	0	0	0.472925						F13
No	203.058	6.06	0.059	5	2	47371.7	11	1.5	13.8358	Irregular exchange	73.8706	0	0.0506415	8.66934	0	4.89588	0	0	12.0145	0	0	0.499011						F14
No	203.058	6.048	0.06	4	2	83788.2	11	3.2	29.3392	Contaminating mass	47.5108	0	0.365481	15.7336	0	5.44042	0	0	30.9497	0	0	0						F7
No	203.058	6.057	0.059	5	2	60126.1	11	3	27.1246	Contaminating mass	46.1916	0	0.00123601	1.37012	30.108	7.13737	0	2.65613e-07	8.93261	1.04548	0.0805552	5.13304						F5
No	203.058	6.027	0.069	5	2	44944.5	11	1.9	17.0331	Contaminating mass	64.5373	9.25923e-05	0.00031014	6.81691	0	22.6985	0	0	3.99825	1.06519e-07	2.09184e-07	1.94855						F1
No	203.058	6.055	0.064	5	2	43883.7	11	1.8	16.6042	Irregular exchange	72.5093	0	0	6.13554	0	2.54621	0	0	18.4635	0	0	0.345471						F15
No	203.058	5.947	0.04	5	2	90321.5	11	3.8	34.6129	Contaminating mass	35.645	0	0.0019187	21.1443	0	15.4317	2.00457e-06	0	21.8004	0	0	5.97665						F8
No	203.058	6.066	0.056	6	2	35743.7	11	0.8	7.68051	Irregular exchange	85.6976	0	0.145483	4.56928	0	2.7347	0	0	6.12495	0	0.194511	0.533513						F16
No	203.058	6.058	0.057	5	2	42220.9	11	1.3	11.6021	Contaminating mass	75.7268	0	0	7.37483	0	10.3921	0	0	6.01012	0	0	0.496136						F6
No	203.08	4.512	0.092	9	3	101198	8	5.1	63.4378	No warnings	1.72098	0.0391856	1.69808	1.0826	38.6013	20.4879	13.1366	20.7121	2.52121									F16
No	203.08	4.511	0.101	4	3	161268	8	0.3	3.74143	Contaminating mass	93.3394	0.486727	0.497773	6.04756e-05	1.82774	2.93776	0	0.835072	0.0754662									F8
No	203.08	4.551	0.1	3	3	174521	8	0.2	2.25196	Contaminating mass	95.96	0.454692	0	1.01119e-05	1.52448	1.67447	0	0	0.386341									F7
No	203.08	4.512	0.101	4	3	135831	8	0.4	4.85871	Contaminating mass	91.1063	0.775249	0.267029	0	4.35694	2.16497	0	1.32808	0.00139804									F5
No	203.08	4.543	0.112	3	3	102997	8	0.3	3.19769	Contaminating mass	94.0011	0.0959847	1.19962	0.000114233	1.91903	2.05448	3.82461e-08	0.700008	0.0296744									F6
No	203.08	4.503	0.111	8	3	202070	8	5.5	69.1676	Irregular exchange	2.2387	4.74202e-09	1.20945	0.795016	25.4773	14.9488	19.8882	30.9856	4.45694									F14
No	203.08	4.511	0.105	8	3	185087	8	5.5	68.9814	Irregular exchange	1.79972	0	1.1973	0.674784	26.0714	17.1915	18.8642	29.6052	4.59589									F13
No	203.08	4.469	0.052	2	3	13082	8	3.8	47.7937	Contaminating mass	6.14821	0	7.31958	0	79.3384	0	0	7.19384	0									F1
No	203.08	4.496	0.096	8	3	175557	8	5.5	68.8468	Irregular exchange	1.99582	0	1.23021	0.663557	26.0362	17.0118	18.8656	29.6489	4.54795									F15
No	203.116	7.503	0.07	3	1	161433	9	5.6	62.3098	Contaminating mass	29.6976	0	0	9.69866e-06	0	0.537673	7.8015e-06	0.0174025	69.7473	0								F8
No	203.116	7.489	0.071	3	1	118146	9	5.7	62.96	Irregular exchange	28.6367	0.30379	0	2.88216e-06	0	0.805141	0	0.0199491	69.9387	0.29571								F14
No	203.116	7.489	0.071	2	1	26046.6	9	0	0.214141	No warnings	99.7496	0	0	0	0	0	0	0.0895588	0.147602	0.0132825								F1
No	203.116	7.491	0.069	2	1	17169.3	9	0	0.0869106	No warnings	99.89	0	0	0	0	0	0	0.103965	0	0.00604898								F6
No	203.116	7.482	0.074	2	1	18574.7	9	0	0.093729	No warnings	99.8817	0	0	0	0	0	0	0.110779	0	0.0075679								F16
No	203.116	7.491	0.064	2	1	29294.7	9	0	0.0645948	No warnings	99.9203	0	0	0	0	0	0	0.0678265	0	0.0118409								F5
No	203.116	7.464	0.064	3	1	13867.6	9	0.3	2.84055	Low pattern fit	88.2293	8.50681	0	0	0	2.951	0	0.256496	0	0.0564039								F15
No	203.116	7.495	0.068	2	1	23348.7	9	0	0.187185	No warnings	98.9948	0.89885	0	0	0	0	0	0.0855374	0	0.0207838								F13
No	203.116	7.485	0.066	3	1	36571.2	9	2	22.2386	Contaminating mass	74.971	0	0	0	0	0	0	0.0851279	24.9439	0								F7
No	203.116	6.834	0.097	4	2	161528	9	5.6	62.3533	Contaminating mass	26.3278	0.11074	0	0.000128405	0.228978	8.77502	0	0.180898	64.3764	0								F8
No	203.116	6.845	0.083	3	2	10301.5	9	0.4	4.99963	Contaminating mass	91.9031	0	0	0.000105393	0	5.84277	0	2.252	0	0.00206006								F6
No	203.116	6.822	0.11	4	2	52804.7	9	3.7	40.9175	Contaminating mass	52.1783	0	0	1.49065e-05	2.60267	0.826384	0	1.42596	42.9667	0								F7
No	203.116	6.839	0.129	3	2	23189.7	9	0.4	4.99046	Contaminating mass	91.6591	0	0	0.000123229	0	6.83153	0	1.33079	0.165786	0.0127073								F1
No	203.116	6.845	0.098	4	2	34858.1	9	0.8	8.4204	Contaminating mass	84.4745	0	0	0	3.59332	10.9841	0.146381	0.801636	0	0								F5
No	203.116	6.869	0.037	3	2	22886.3	9	4.4	48.7179	Irregular exchange	17.6735	0	0	2.84807e-05	11.0144	52.411	0	18.8808	0	0.0202765								F15
No	203.116	6.864	0.115	4	2	29580	9	0.7	7.36481	Irregular exchange	87.162	0	0	0.460773	3.02522	6.90062	0.0556543	1.79936	0	0.596396								F13
No	203.116	6.832	0.092	4	2	24310.2	9	1.7	18.6027	Irregular exchange	67.0888	0	0	0.00023349	2.15873	28.2621	0	2.46612	0	0.0239477								F16
No	203.116	7.037	1.423	4	2	132719	9	5.7	63.0422	Irregular exchange	23.5704	0.198261	0	3.54831e-05	2.16924	11.2355	0	0.426894	62.2581	0.141528								F14
No	203.131	14.433	0.142	3	1	12886.2	7	4.6	65.5887	Contaminating mass	8.19133	0	0	0	0.00103022	91.729	0.0786842	0										F1
No	203.131	14.347	0.133	1	1	1534.66	7	0	0	No warnings	100	0	0	0	0	0	0	0										F8
No	203.131	13.94	0.07	3	1	7902.64	13	0.1	1.14904	No warnings	98.6442	0	0	0	0	0	0	0	0	1.59771e-06	0	1.34401	0	0.0118008				F13
No	203.131	13.923	0.08	4	1	17188.7	13	3	23.0697	Contaminating mass	61.6795	0	0	1.99848	0	0	0.00016429	0.00204775	35.2076	0	0	1.11219	0	0				F1
No	203.131	13.908	0.077	5	1	10778.6	13	1.6	12.1363	Irregular exchange	79.2767	0	0	1.95708	0	0	8.48521e-05	0.00105762	18.1839	0	0	0.566838	0	0.0142861				F15
No	203.131	13.963	0.065	3	1	6948.74	13	1.3	10.334	Contaminating mass	83.2092	0	0	0	0	0	7.83301e-05	0.000976324	16.7863	0	0	0	0	0.00343001				F7
No	203.131	13.935	0.071	4	1	9872.96	13	0.4	3.27838	Irregular exchange	94.7748	0	0	0	0	0	2.31099e-05	0.000288047	4.9525	0	0	0.272438	0	0				F16
No	203.131	13.928	0.076	5	1	13252.2	13	1.5	11.4391	Irregular exchange	81.4018	0	0	0.843636	0	0	7.64086e-05	0.000952374	16.3745	0	0	1.37693	0	0.00216021				F14
No	203.131	13.924	0.073	3	1	10314	13	0.3	2.51276	Contaminating mass	95.9279	0	0	0	0	0	1.89167e-05	0.000235782	4.05389	0	0	0	0	0.0179249				F8
No	203.131	13.936	0.076	4	1	7967.08	13	2.5	19.0653	Contaminating mass	67.046	0	0	3.15617	0	0	0.000139037	0.00173299	29.7959	0	0	0	0	0				F5
No	203.131	13.947	0.077	3	1	6789.8	13	1.2	9.03041	Contaminating mass	85.3298	0	0	0	0	0	6.84192e-05	0.000852793	14.6624	0	0	0	0	0.00692451				F6
No	203.131	11.165	0.072	4	1	15189.2	13	1	8.07376	Irregular exchange	87.9253	0	0	0	0	0	4.33644e-05	0.000540503	9.29306	0	0	2.77174	0	0.00932757				F15
No	203.131	11.158	0.069	3	1	13377.2	13	1.1	8.21406	Irregular exchange	90.2925	0	0	0	0	0	0	0	0	1.11314e-05	0	9.70752	0	0				F16
No	203.131	11.156	0.074	3	1	15454	13	0.4	2.96756	No warnings	96.4929	0	0	0	0	0	0	0	0	4.02153e-06	0	3.50711	0	0				F13
No	203.131	11.156	0.073	3	1	10693.4	13	0.9	6.61769	Contaminating mass	92.1791	0	0	0	0	0	0	0	0	8.96806e-06	0	7.82089	0	0				F6
No	203.131	11.147	0.074	3	1	46782.3	13	5.4	41.7467	Contaminating mass	31.986	1.87385	0	0	0	0	0.000290479	0.0036206	62.2502	3.03219e-06	0	3.85744	0	0.0286305				F1
No	203.131	11.152	0.072	3	1	13090	13	0.7	5.27437	Contaminating mass	93.7667	0	0	0	0	0	0	0	0	7.14764e-06	0	6.23334	0	0				F8
No	203.131	11.169	0.07	4	1	17242.8	13	0.5	4.14703	Contaminating mass	94.2651	0	0	0	0	0	1.43109e-05	0.000178374	3.06685	0	0	2.65321	0	0.0146113				F7
No	203.131	11.166	0.072	5	1	16401.8	13	0.9	6.64495	Irregular exchange	90.3376	0	0	0.000660434	0	0	0	1.04166e-05	6.17037	0.692825	0	2.79854	0	0				F14
No	203.131	11.165	0.072	4	1	14534.1	13	1	7.97457	Contaminating mass	88.0401	0	0	0	0	0	4.34448e-05	0.000541505	9.31029	0	0	2.62738	0	0.0216816				F5
No	203.152	6.742	0.073	2	1	59923.6	10	0	0	No warnings	100	0	0	0	0	0	0	0	0	0	0							F13
No	203.152	6.75	0.077	2	1	29705.6	10	0	0	No warnings	100	0	0	0	0	0	0	0	0	0	0							F15
No	203.152	6.746	0.082	2	1	69628	10	0	0.00312224	No warnings	99.9969	0	0	0	0	0	0	0	0	0	0.00312224							F5
No	203.152	6.753	0.075	2	1	51600.3	10	0	0.00492962	No warnings	99.9951	0	0	0	0	0	0	0	0	0	0.00492962							F1
No	203.152	6.744	0.069	2	1	57882.4	10	0	0.0182877	No warnings	99.9817	0	0	0	0	0	0	0	0	0	0.0182877							F8
No	203.152	6.741	0.071	2	1	40147.6	10	0	0	No warnings	100	0	0	0	0	0	0	0	0	0	0							F16
No	203.152	6.74	0.073	2	1	38946	10	0	0	No warnings	100	0	0	0	0	0	0	0	0	0	0							F6
No	203.152	6.741	0.07	2	1	47327.8	10	0	0.012576	No warnings	99.9874	0	0	0	0	0	0	0	0	0	0.012576							F14
No	203.152	6.741	0.075	2	1	62213.4	10	0	0	No warnings	100	0	0	0	0	0	0	0	0	0	0							F7
No	203.189	6.757	0.065	2	1	24419.7	11	0	0	No warnings	100	0	0	0	0	0	0	0	0	0	0	0						F8
No	203.189	6.76	0.059	2	1	20658.8	11	0	0	No warnings	100	0	0	0	0	0	0	0	0	0	0	0						F13
No	203.189	6.763	0.065	2	1	18849.7	11	0	0	No warnings	100	0	0	0	0	0	0	0	0	0	0	0						F5
No	203.189	6.761	0.06	2	1	11170.6	11	0	0	No warnings	100	0	0	0	0	0	0	0	0	0	0	0						F16
No	203.189	6.759	0.065	2	1	10403.8	11	0	0.00188822	No warnings	99.9979	0	0	0	0	0	0	0	0	0	0.00207704	0						F1
No	203.189	6.761	0.061	2	1	11633.8	11	0	0	No warnings	100	0	0	0	0	0	0	0	0	0	0	0						F6
No	203.189	6.759	0.07	2	1	18126.3	11	0	0	No warnings	100	0	0	0	0	0	0	0	0	0	0	0						F7
No	203.189	6.76	0.062	2	1	11355.8	11	0	0	No warnings	100	0	0	0	0	0	0	0	0	0	0	0						F14
No	203.189	6.761	0.055	1	1	1499.62	11	0	0	No warnings	100	0	0	0	0	0	0	0	0	0	0	0						F15
No	204.022	3.484	0.078	2	2	18752.8	7	0.2	2.31482	Contaminating mass	84.7466	14.9309	0	0.0580764	0.249173	0.00265739	0	0.0126728										F7
No	204.022	3.497	0.097	3	2	18942.1	7	0.3	3.98049	Contaminating mass	80.2528	17.0269	0	0.090097	2.60931	0.00853428	0	0.012326										F5
No	204.022	3.534	0.077	2	2	13120.5	7	0.4	6.27971	Contaminating mass	82.5383	8.97116	1.37031	0.294268	2.76619	4.05972	0	0										F1
No	204.022	3.488	0.079	3	2	13574.1	7	0.3	3.77624	No warnings	82.8978	13.9593	0	0.149261	2.97634	0	0	0.0173293										F15
No	204.022	3.476	0.081	2	2	13916.2	7	0.2	2.58926	No warnings	82.6811	17.0566	0	0.0610993	0.17017	0.00642302	0	0.0245858										F14
No	204.022	3.479	0.088	3	2	28000.2	7	0.3	4.02398	Contaminating mass	81.6518	15.3585	0	0	2.13902	0.850649	0	0										F6
No	204.022	3.473	0.085	2	2	18485	7	1	14.0651	Irregular exchange	68.9727	11.9595	0.909728	0.135174	11.2777	4.02783	0	2.71737										F16
No	204.022	3.429	0.086	2	2	14827.7	7	0.2	2.66623	No warnings	82.8141	16.6788	0	0.0719397	0.425391	0.000673717	0	0.00915105										F13
No	204.022	3.517	0.083	2	2	16238.9	7	0.2	2.6422	Contaminating mass	82.2036	17.5367	0	0.0919656	0.15565	0.0120347	0	0										F8
No	204.043	5.956	0.077	4	1	14238.8	12	3.9	32.8753	Irregular exchange	21.2553	0	0	41.6349	0	0	27.7215	0	0	0	6.92233e-05	9.38814	0					F14
No	204.043	5.969	0.077	4	1	17719.2	12	4.5	37.2765	Contaminating mass	9.58578	0	0	53.9388	0	0	23.1457	0	0	0	9.82858e-05	13.3296	0					F7
No	204.043	5.918	0.072	4	1	22513.7	12	2.8	23.1242	Contaminating mass	46.924	0	0	30.6064	0	0	12.2989	0	0	0	7.49925e-05	10.1706	0					F6
No	204.043	5.988	0.079	4	1	17931.9	12	3.8	31.8111	Irregular exchange	27.6468	0	0	42.2732	0	0	15.1933	0	0	0	0.000109766	14.8866	0					F13
No	204.043	5.944	0.067	4	1	9211.92	12	2.5	20.9084	Irregular exchange	28.0749	0	0	59.5465	1.00501	0	11.3736	0	0	0	0	0	0					F16
No	204.043	5.961	0.076	4	1	15137.5	12	4	33.3181	Irregular exchange	28.3756	0	0	34.6833	0	0	22.117	0	0	0	0.000109305	14.824	0					F15
No	204.043	5.941	0.074	4	1	65223.9	12	2.9	24.2393	Contaminating mass	54.8232	1.41663e-05	0.00535413	19.7603	0	0	8.44064	0	1.91293	0	0.000111025	15.0574	0					F1
No	204.043	5.975	0.081	4	1	17418.1	12	4.8	39.8046	Contaminating mass	20.0877	0	0	39.3437	0	0	17.326	0	0	0	0.000171377	23.2424	0					F5
No	204.043	5.943	0.078	4	1	12534.2	12	4	33.1901	Contaminating mass	25.5124	0	0	44.8793	0	0	12.4098	0	0	0	0.000126812	17.1984	0					F8
No	204.054	8.141	0.067	4	1	22508.3	10	0.3	3.38912	No warnings	95.1294	0	0	5.01912e-05	0	2.38055	0	0	0.421449	2.06852	0							F15
No	204.054	8.145	0.071	2	1	19330.4	10	0.1	1.34431	Contaminating mass	98.5063	0	0	0	0	0	0	0	0	1.49368	0							F6
No	204.054	8.146	0.069	2	1	17854.6	10	0	0.301326	No warnings	99.6233	0	0	0	0	0	1.46815e-06	0	0.376657	0	0							F13
No	204.054	8.135	0.065	3	1	20335.4	10	0.2	1.88241	Contaminating mass	97.0205	0	0	4.21199e-05	0	1.99773	0	0	0	0.981706	0							F8
No	204.054	8.135	0.069	2	1	25760.2	10	0	0.179656	No warnings	99.7783	0	0	0	0	0	1.29185e-06	0	0.210014	0	0.0116443							F7
No	204.054	8.15	0.067	3	1	22795.6	10	0.1	1.49039	No warnings	98.344	0	0	0	0	0	0	0	0	1.65598	0							F14
No	204.054	8.143	0.064	3	1	16594.7	10	0	0.338931	No warnings	99.5763	0	0	0	0	0	1.65137e-06	0	0.423663	0	0							F16
No	204.054	8.116	0.073	1	1	13031.9	10	0	0.415708	Low pattern fit	99.5397	0	0	0	0	0	0	0	0	0.44597	0.0143345							F1
No	204.054	8.138	0.068	1	1	106344	10	0.3	2.89193	Contaminating mass	96.7867	0	0	0	0	0	0	0	0	3.21325	0							F5
No	204.054	8.318	0.072	2	1	14452	10	0.1	0.645448	No warnings	99.2828	0	0	0	0	0	0	1.06721e-06	0	0.717163	0							F5
No	204.054	8.316	0.066	3	1	17106.6	10	0.7	7.2264	Contaminating mass	86.887	0	0	0.000241154	0	11.4378	0	0	0	1.6749	0							F6
No	204.054	8.323	0.069	2	1	16480.2	10	0.3	2.60396	Irregular exchange	94.792	0	0	0.000109802	0	5.20785	0	0	0	0	0							F16
No	204.054	8.316	0.072	3	1	20184.4	10	0.3	3.38559	Contaminating mass	93.7199	0	0	0.000119465	0	5.66617	0	0	0	0.61386	0							F7
No	204.054	8.32	0.07	3	1	17724.1	10	0.2	1.96251	No warnings	96.7551	0	0	5.04878e-05	0	2.39462	0	0	0	0.850213	0							F14
No	204.054	8.322	0.076	3	1	17535.9	10	0.5	4.52585	Irregular exchange	91.9076	0	0	0.000145332	0	6.89304	0	0	0	1.19921	0							F15
No	204.054	8.321	0.072	2	1	13922.7	10	0.1	0.52838	No warnings	99.4129	0	0	0	0	0	0	8.73643e-07	0	0.587088	0							F8
No	204.054	8.303	0.071	1	1	23251.2	10	0	0.323658	No warnings	99.6404	0	0	0	0	0	0	0	0	0.35962	0							F1
No	204.054	8.322	0.074	2	1	18588.8	10	1.1	10.569	Irregular exchange	78.8618	0	0	0.000445665	0	21.1377	0	0	0	0	0							F13
No	204.054	6.532	0.021	1	1	1283.77	10	9	90	Contaminating mass	0	0	0	0	0	0	0	0	0	100	0							F7
No	204.054	6.57	0.034	2	1	30274	10	1.1	11.3491	Irregular exchange	87.3186	0	0	0	0	0	0.000173784	0.000292759	4.77933	3.76227	4.13928							F16
No	204.054	6.516	0.02	3	1	3024.78	10	6.7	67.4236	Irregular exchange	0.140799	0	0	0	0.00045067	54.3069	2.42253	0	0	43.1294	0							F14
No	204.054	6.456	0.041	3	1	5333.18	10	6.3	62.9084	Contaminating mass	0	0	0	0.00140898	0	66.8273	0	0	3.59794	29.5733	0							F8
No	204.054	6.374	0.095	3	1	5596.24	10	0.9	9.09109	Contaminating mass	89.1535	0	0	0	0	0	4.00599e-06	3.9474e-05	6.70736	4.13908	0							F5
No	204.054	6.467	0.073	4	1	23055.7	10	0.5	4.53759	Contaminating mass	93.1012	0	0	0.0017706	0	3.08879	0.269552	0	3.53867	0	0							F1
No	204.054	6.448	0.055	3	1	3414.53	10	5.9	59.1697	Irregular exchange	0.193577	0	0	0.0015507	0	73.5491	0	0	12.3552	13.9005	0							F15
No	204.054	6.533	0.013	4	1	6681.02	10	1.8	17.6297	Contaminating mass	78.1573	0	0	9.8901e-05	0	4.69084	0	0	1.52268	15.629	0							F6
No	204.054	6.444	0.036	3	1	2622	10	6	59.662	Irregular exchange	0.171532	0	0	0.00157691	0	74.7923	0	0	2.65793	22.3767	0							F13
No	204.054	5.973	0.139	4	1	24602.5	10	3.2	32.2903	Contaminating mass	53.8579	0	0	0.000445615	0	21.1353	0	0	7.83268	17.1737	0							F1
No	204.054	6.127	0.058	4	1	26438.8	10	1.9	18.6108	Contaminating mass	73.8804	0	0	0.000207297	0	9.83199	0.000272297	0	9.63845	6.64872	0							F7
No	204.054	5.95	0.041	4	1	9802.48	10	3.9	39.45	Irregular exchange	45.9286	0	0	0.000448023	0	21.2496	0	0	7.14103	25.6803	0							F13
No	204.054	5.946	0.127	3	1	16290.2	10	1.2	11.7362	Contaminating mass	79.0747	0	0	0.000351667	0	16.6794	0	0	4.24549	0	0							F8
No	204.054	6.041	0.017	4	1	8721.59	10	4.4	44.4035	Contaminating mass	43.2888	0	0	0.0003319	0	15.7419	0	0	3.39566	37.5733	0							F5
No	204.054	5.976	0.053	4	1	12917.9	10	2.1	20.9138	Low pattern fit	68.3673	0	0	0.000356131	0	16.8911	0	0	7.9899	6.75134	0							F15
No	204.054	5.948	0.127	4	1	16615.1	10	1.8	17.5375	Contaminating mass	78.7773	0	0	6.13359e-05	0	2.90914	0	0	3.9921	14.3213	0							F6
No	204.054	5.96	0.057	4	1	7825.42	10	2.4	23.9713	Low pattern fit	64.0237	0	0	0.000391997	0	18.5923	0	0	9.70292	7.68074	0							F14
No	204.054	5.957	0.058	4	1	9701.09	10	3.5	35.1744	Irregular exchange	47.0225	0	0	0.000176484	0	26.8768	0	0	17.545	8.55552	0							F16
No	204.078	14.722	0.068	3	1	7986.45	12	1.2	9.63946	Contaminating mass	89.4842	0	0	0	0	0	0	0	0	1.20812e-05	0	10.5158	0					F7
No	204.078	14.697	0.074	4	1	12755.6	12	2.1	17.5682	Irregular exchange	48.5328	0	0	44.4151	0	0	0	0	0	8.10192e-06	0	7.0521	0					F16
No	204.078	14.736	0.071	3	1	29206.9	12	1.8	15.3634	Irregular exchange	42.1695	0	0	56.4719	0	0	0	0	0	1.56091e-06	0	1.35865	0					F15
No	204.078	14.715	0.072	2	1	8724.58	12	0.3	2.23091	Contaminating mass	97.5663	0	0	0	0	0	0	0	0	2.79601e-06	0	2.43372	0					F6
No	204.078	14.729	0.068	3	1	13249.3	12	0.4	3.20427	No warnings	96.5044	0	0	0	0	0	0	0	0	4.01593e-06	0	3.49556	0					F13
No	204.078	14.716	0.068	3	1	12742.6	12	0.5	4.46074	Contaminating mass	95.1337	0	0	0	0	0	0	0	0	5.59067e-06	0	4.86625	0					F1
No	204.078	14.742	0.061	4	1	22950.6	12	1.9	16.022	Irregular exchange	52.1573	0	0	41.7507	0	0	0	0	0	6.99891e-06	0	6.09201	0					F14
No	204.078	14.735	0.067	2	1	8112.3	12	0.3	2.61222	Contaminating mass	97.1503	0	0	0	0	0	0	0	0	3.27392e-06	0	2.8497	0					F8
No	204.078	14.748	0.067	3	1	24533.1	12	1.8	15.0209	Contaminating mass	43.3775	0	0	55.3245	0	0	0	0	0	1.49119e-06	0	1.29796	0					F5
No	204.079	9.183	0.171	2	1	3934.77	12	6.8	56.6096	Contaminating mass	15.0853	0	0	0	0	0	0.00112769	0	84.9135	0	0	0	0					F8
No	204.079	9.176	0.086	2	1	1119.26	12	2.9	24.5101	Contaminating mass	73.2617	0	0	0	0	0	0	0	0	3.07187e-05	0	26.7383	0					F1
No	204.079	9.123	0.023	3	1	1928.73	12	1.4	11.6461	Irregular exchange	69.1457	0	0	22.9967	0	0	0	5.93928e-05	0	7.84222	0	0	0.0152302					F13
No	204.079	9.378	0.093	3	1	7542.27	12	5.5	45.6076	Contaminating mass	33.0319	0.394434	0	0	0	0	0	0.000228874	59.9795	2.73711	0	3.85686	0					F7
No	204.079	8.924	0.112	5	1	25903.2	12	6.2	51.3905	Contaminating mass	24.8127	0	0	0.602842	0	0	9.86724e-05	0.000169431	67.3375	0.784678	1.96806	4.49395	0					F5
No	204.079	9.246	0.166	3	1	7677.44	12	7.4	61.6507	Irregular exchange	18.8454	0	0	0	0	0	0.000676812	0	50.9629	0	0	30.191	0					F15
No	204.079	9.167	0.101	2	1	1775.42	12	1.5	12.6766	Irregular exchange	86.171	0	0	0	0	0	0	0	0	1.58877e-05	0	13.829	0					F14
No	204.079	9.12	0.243	3	1	5040.98	12	6.4	53.3247	Irregular exchange	22.4969	0	0	0	0	0	0.000941288	0	70.8775	0	0	6.62457	0					F16
No	204.09	6.695	0.024	2	1	5369	6	2.7	45.5781	Contaminating mass	34.4558	9.3814	0	0	16.7267	39.4361	0											F5
No	204.09	6.721	0.023	1	1	2943.43	6	1.5	24.3386	Contaminating mass	59.1971	5.72667	0	0	35.0763	0	0											F7
No	204.09	6.693	0.054	1	1	1432.57	6	0	0	No warnings	100	0	0	0	0	0	0											F6
No	204.09	6.914	0.069	1	1	5528.88	6	4.6	76.5456	Low pattern fit	0.242	13.1546	0	3.23445	0.0353334	63.7273	19.6063											F15
No	204.09	6.796	0.035	2	1	20260.3	6	2.6	43.3139	Low pattern fit	39.3308	8.79161	0.277028	0.0743115	7.31634	44.2099	0											F13
No	204.09	6.813	0.021	2	1	6266.71	6	3.7	61.7541	Low pattern fit	0.240809	32.4622	0	0	0.000570842	65.7183	1.57808											F16
No	204.09	6.562	0.027	2	1	11069	6	4	66.75	Contaminating mass	18.034	5.64571	0	0	2.2155	58.6363	15.4684											F8
No	204.09	6.804	0.024	2	1	9451.17	6	1.6	26.5595	Low pattern fit	10.3406	72.1709	0.528982	0.346626	7.29446	3.58161e-05	9.31839											F14
No	204.09	6.648	0.037	2	1	1634.6	6	2.6	42.7961	Contaminating mass	44.7748	4.83713	0	0	0.000570687	50.3875	0											F1
No	204.09	5.85	0.062	3	4	2.45594e+06	11	0	0.154526	No warnings	99.7174	0	0.00345977	0.000201999	8.64515e-07	0.181836	0.00429802	0	0.084987	0.00288018	0.0028019	0.00213209						F7
No	204.09	5.849	0.062	10	4	1.98954e+06	11	0.5	4.28874	No warnings	84.7062	4.79546	2.79932	2.18289	1.65065	1.61521	0.983787	0.627093	0.497989	0.13644	0.00436132	0.000621265						F13
No	204.09	5.845	0.059	8	4	1.25778e+06	11	0.2	1.57581	No warnings	92.4294	3.49692	1.56885	1.00064	0.555205	0.604019	0.132515	0.0552937	0.148107	0.00381402	0.00293004	0.00234439						F16
No	204.09	5.848	0.06	10	4	1.95903e+06	11	0.5	4.79072	No warnings	83.9013	4.51853	2.93877	2.30392	1.79629	1.81813	1.08167	0.69656	0.780201	0.14139	0.0216937	0.00157553						F14
No	204.09	5.846	0.057	10	4	2.16222e+06	11	0.4	3.30277	No warnings	87.2544	4.5223	2.52609	1.71982	1.2465	1.18527	0.691081	0.407054	0.346187	0.0947097	0.00572662	0.000834481						F15
No	204.09	5.855	0.061	4	4	2.40285e+06	11	0	0.241419	No warnings	99.6138	0.00138735	0.00226949	0.00772356	2.27929e-06	0.128513	0	0	0.238067	0.00484609	0.00182919	0.00159044						F8
No	204.09	5.894	0.068	3	4	21845.4	11	3.5	31.7338	Contaminating mass	42.9412	0.711944	5.74782	0.0242362	0.000152395	29.0115	0	0	9.95274	4.0006	7.60109	0.00869748						F1
No	204.09	5.851	0.064	5	4	1.09625e+06	11	0	0.259103	No warnings	99.5042	0.0227139	0.0126729	0.000269338	3.97551e-06	0.299251	0	0	0.150271	0.00536531	0.00300224	0.00222885						F6
No	204.09	5.855	0.062	4	4	1.82794e+06	11	0.1	1.33915	Contaminating mass	98.0518	0.00692491	0	0.00231804	0	0.267875	0	0	1.66614	0.00307797	0	0.00187245						F5
No	204.09	6.152	0.154	9	1	95545.8	11	1.1	10.3147	Irregular exchange	79.0772	1.50787	0.0202455	7.31993	0.313259	1.22962	0.963047	0	9.36076	0.200035	0	0.00799367						F14
No	204.09	6.194	0.099	7	1	56907.3	11	1	9.154	Irregular exchange	83.9859	2.35112	0	0	1.49603e-05	3.55349	0.365394	0.155824	9.02452	0.552496	0	0.0112407						F13
No	204.09	6.154	0.101	5	1	116274	11	0.7	6.7498	Contaminating mass	90.534	0	0	5.39607e-05	0.375573	0	0	0	9.08299	0	0	0.00740185						F7
No	204.09	6.17	0.121	5	1	96817.6	11	1	9.27053	Contaminating mass	86.6428	0	0	3.13553e-05	4.60122e-05	1.63052	0	0	11.7233	0	0	0.00333737						F8
No	204.09	6.177	0.079	4	1	43015	11	1.2	10.8052	Irregular exchange	83.5795	0	0	7.99498e-05	0.0736935	4.13391	0	0	12.1493	0	0	0.0634988						F16
No	204.09	6.167	0.076	3	1	14115.4	11	2.3	20.4857	Contaminating mass	65.931	0	0	0.000302688	0.000444179	15.7402	0	0	18.3232	0	0	0.00487497						F1
No	204.09	6.169	0.131	7	1	56451	11	0.8	7.06522	Contaminating mass	89.4185	0	0	0.112611	0.0955096	1.99644	0	0	8.37692	0	0	0						F6
No	204.115	10.637	0.081	3	1	1773.57	13	0.3	2.24201	No warnings	81.4422	7.96949	10.5883	0	0	0	0	0	0	0	0	0	0	0				F16
No	204.115	10.635	0.077	8	1	9883.76	13	3	22.7173	Irregular exchange	32.8169	11.4496	11.9001	14.5071	7.23632	8.31974	0	0	0	2.73149	0	11.0387	0	0				F15
No	204.115	10.637	0.07	2	1	8629.2	13	0	0.0792132	No warnings	99.9208	0	0	0	0	0	0	0	0	0	0	0	0	0.0792132				F7
No	204.115	10.624	0.081	4	1	8703.7	13	1	7.75162	Contaminating mass	90.3771	0	0	0	0	0	0	2.24495e-05	0	2.54019	0	7.08266	0	0				F8
No	204.115	10.632	0.068	7	1	6711.13	13	1.9	14.72	Irregular exchange	37.7742	10.2247	11.4536	26.8735	3.83542	6.59083	0	0	0	3.22726	0	0	0	0.0204872				F13
No	204.115	10.631	0.08	8	1	8090.97	13	2.6	19.8517	Irregular exchange	31.3248	10.9805	10.5259	28.1981	3.6903	5.9216	0	0	0	2.93668	0	6.42118	0	0.000981203				F14
No	204.115	10.639	0.07	3	1	7314.17	13	0.5	3.74612	Contaminating mass	95.5757	0	0	0	0	0	0	0	0	1.02647e-05	0	4.40811	0	0.0161799				F5
No	204.115	10.628	0.083	2	1	1712.19	13	0.4	3.08371	Contaminating mass	86.6372	0	0	13.3628	0	0	0	0	0	0	0	0	0	0				F6
No	204.136	7.97	0.076	1	1	1447.2	10	0	0	No warnings	100	0	0	0	0	0	0	0	0	0	0							F16
No	204.136	7.942	0.087	1	1	1483.04	10	0	0	No warnings	100	0	0	0	0	0	0	0	0	0	0							F6
No	204.136	7.971	0.081	1	1	1130.77	10	0	0	No warnings	100	0	0	0	0	0	0	0	0	0	0							F14
No	204.136	7.966	0.089	1	1	1243.13	10	0	0	No warnings	100	0	0	0	0	0	0	0	0	0	0							F13
No	204.136	7.964	0.092	1	1	2176.32	10	0	0	No warnings	100	0	0	0	0	0	0	0	0	0	0							F7
No	204.136	7.964	0.073	1	1	1803.22	10	0	0	No warnings	100	0	0	0	0	0	0	0	0	0	0							F5
No	204.136	7.966	0.069	1	1	2264.9	10	0	0	No warnings	100	0	0	0	0	0	0	0	0	0	0							F8
No	204.136	7.88	0.079	1	1	1905.98	10	0	0	No warnings	100	0	0	0	0	0	0	0	0	0	0							F1
No	204.136	10.704	0.025	2	3	7159.82	10	3.5	34.8491	Contaminating mass	55.7515	0	1.49219	0	0	0.000294819	0	27.3514	8.34233e-06	1.28993e-05	15.4046							F6
No	204.136	10.679	0.094	3	3	18789.8	10	5.6	56.2715	Irregular exchange	18.7214	0	0.00154353	0	36.6215	8.0314e-05	0	10.1098	0	0	34.5457							F14
No	204.136	10.681	0.097	3	3	8005.09	10	3	30.3176	Contaminating mass	62.6912	0	0.000137685	0	3.26668	0	0	16.77	0	0	17.2719							F7
No	204.136	10.71	0.094	3	3	12786.7	10	4.5	45.3436	Contaminating mass	47.245	0	0	0.00021116	0	7.50807	0	12.191	0	0	33.0557							F1
No	204.136	10.682	0.086	4	3	10857.2	10	4.5	45.1521	Irregular exchange	38.1706	1.43384	1.98628	0	19.3148	0	0	7.36307	0	0	31.7314							F13
No	204.136	10.726	0.032	4	3	10865.9	10	2.6	25.7785	Contaminating mass	67.4495	0	0	0	8.25828	0	0	6.05677	0	0	18.2355							F8
No	204.136	10.734	0.028	5	3	7565.25	10	2.4	23.9154	Irregular exchange	66.8233	0.687593	0	0	10.9502	0	0	6.9076	0	0	14.6313							F15
No	204.136	10.678	0.098	2	3	7351.51	10	3.5	35.2874	Contaminating mass	60.321	0	0	0	0	0.000157662	0	14.6383	0	0	25.0405							F5
No	204.136	10.664	0.033	3	3	9714.47	10	1.9	19.488	Irregular exchange	68.2379	0	0	0	20.4523	0.00545389	0	0	0	0	11.3043							F16
No	204.148	5.734	0.049	3	1	4973.93	9	0.4	4.01333	Irregular exchange	93.9115	0	0	0	0	0.411206	5.67732	0	0	0								F13
No	204.148	5.732	0.053	2	1	4127.43	9	0.1	1.38415	No warnings	97.9159	0	0	0	0	0.0472302	2.03687	0	0	0								F14
No	204.148	5.698	0.104	3	1	9321.04	9	3.7	41.622	Irregular exchange	25.345	0	0	0	0	73.332	1.32293	0	0	0								F16
No	204.148	5.743	0.052	3	1	6558.36	9	0.9	10.2841	Contaminating mass	82.2379	0	0	0	0	14.016	3.74612	0	0	0								F8
No	204.148	5.772	0.061	1	1	4032.16	9	0	0.259334	Low pattern fit	99.5332	0	0	0	0	0.466801	0	0	0	0								F6
No	204.148	5.749	0.06	2	1	3780.84	9	0.2	2.34389	Contaminating mass	96.4842	0	0	0	2.79801e-05	0	3.51582	0	0	0								F5
No	204.148	5.76	0.057	2	1	2557.75	9	0.4	4.20159	Contaminating mass	93.664	0	0	0	0	0.201549	6.13443	0	0	0								F1
No	204.148	5.731	0.051	2	1	7185.21	9	0.4	3.9225	Contaminating mass	93.9748	0	0	0	0	0.848498	5.17668	0	0	0								F7
No	204.151	13.616	0.088	4	1	21186.3	14	4.5	32.0455	Irregular exchange	45.2791	0	0	1.68928	0	0	0.000236665	0.00604721	46.5847	8.88581e-06	0	6.44066	0	0	0			F15
No	204.151	13.603	0.118	5	1	7065.69	14	1.9	13.9102	Contaminating mass	76.5329	0	0	3.57017	0	0	5.89783e-05	0.001507	11.6092	0	0	8.28619	0	0	0			F5
No	204.151	13.615	0.105	4	1	5531.05	14	2.6	18.266	Irregular exchange	63.7178	0	0	10.3913	0	0	0.000102011	0.00260655	20.0796	0	0	5.8086	0	0	0			F13
No	204.151	13.614	0.096	5	1	6094.22	14	1.8	12.7653	Contaminating mass	72.7149	2.14218	0	7.20112	0	0	7.17744e-05	0.00183397	14.128	0	0	3.81195	0	0	0			F8
No	204.151	13.61	0.102	4	1	14017.3	14	0.8	5.97343	Irregular exchange	89.3087	0	0	4.24697	0	0	0	0	0	1.68004e-05	0	6.44427	0	0	0			F16
No	204.151	13.605	0.108	3	1	17111.8	14	5.3	37.9799	Irregular exchange	37.2618	0	0	3.55915	0	0	0.000219985	0.00562102	43.3015	4.13779e-05	0	15.8716	0	0	0			F14
No	204.151	13.592	0.21	4	1	23847.3	14	5	36.0145	Contaminating mass	34.6834	0.933502	0	8.09555	0	0	0.000237344	0.00606456	46.7184	1.64342e-05	0	9.56286	0	0	0			F1
No	204.151	13.602	0.121	3	1	7322.31	14	2	14.2251	Contaminating mass	78.4073	0	0	0	0	0	6.49622e-05	0.0016599	12.7871	0	0	8.80392	0	0	0			F7
No	204.151	13.583	0.167	4	1	6349.88	14	3.1	22.4884	Contaminating mass	56.8684	0	0	11.3838	0	0	0.000116046	0.00296519	22.8424	0	0	8.90235	0	0	0			F6
No	204.184	6.761	0.06	2	1	6785.97	10	0	0.0448678	No warnings	99.9103	0	0	0	0	0.0897356	0	0	0	0	0							F13
No	204.184	6.77	0.062	1	1	5271.13	10	0	0.0078066	No warnings	99.9844	0	0	0	0	0.0156132	0	0	0	0	0							F16
No	204.184	6.755	0.065	1	1	4005.22	10	0	0.0325288	No warnings	99.9349	0	0	0	0	0.0650576	0	0	0	0	0							F14
No	204.184	6.766	0.056	1	1	3727.02	10	0	0	No warnings	100	0	0	0	0	0	0	0	0	0	0							F6
No	204.184	6.76	0.071	1	1	1399.99	10	0	0.111551	No warnings	99.7769	0	0	0	0	0.223101	0	0	0	0	0							F15
No	204.184	6.768	0.064	1	1	5606.92	10	0	0.0457568	No warnings	99.9085	0	0	0	0	0.0915137	0	0	0	0	0							F5
No	204.184	6.777	0.069	1	1	6322.88	10	0	0.138963	No warnings	99.7221	0	0	0	0	0.277926	0	0	0	0	0							F7
No	204.184	6.759	0.064	1	1	2920.41	10	0	0	No warnings	100	0	0	0	0	0	0	0	0	0	0							F1
No	204.184	6.759	0.069	2	1	7552.75	10	0	0	No warnings	100	0	0	0	0	0	0	0	0	0	0							F8
No	204.98	3.481	0.09	1	2	11342.4	4	0	0.0364295	No warnings	99.9514	0	0	0.0485726	0													F16
No	204.98	3.491	0.081	1	2	21743.8	4	0	0.0361088	No warnings	99.9519	0	0	0.048145	0													F7
No	204.98	3.421	0.091	1	2	13906.2	4	0	0.0210012	No warnings	99.972	0	0	0.0280016	0													F14
No	204.98	3.46	0.081	1	2	27901	4	0	0.0368029	No warnings	99.9509	0	0	0.0490706	0													F5
No	204.98	3.506	0.092	1	2	18568.4	4	0	0.0343975	No warnings	99.9541	0	0	0.0458634	0													F6
No	204.98	3.45	0.096	1	2	12367.9	4	0	0.0571466	No warnings	99.9238	0	0	0.0761955	0													F13
No	204.98	3.536	0.088	1	2	23834.3	4	0	0.0297587	No warnings	99.9603	0	0	0.0396783	0													F1
No	204.98	3.478	0.098	1	2	11252.8	4	0	0.00398971	No warnings	99.9947	0	0	0.00531962	0													F15
No	204.98	3.481	0.092	1	2	13118.4	4	0	0.0716799	No warnings	99.9044	0	0	0.0955733	0													F8
No	205.038	7.868	0.094	2	1	13430.3	10	0.2	1.75499	Contaminating mass	98.245	0	0	0	0	0	0	0	0	0	1.75499							F7
No	205.038	7.888	0.132	3	1	17177.1	10	0	0.230859	No warnings	99.7691	0	0	0	0	0	0	0	0	0	0.230859							F13
No	205.038	7.882	0.09	1	1	10527.3	10	0	0.0435394	No warnings	99.6222	0.371359	0	0	0	0	0	0	0	0	0.00640343							F5
No	205.038	7.875	0.101	2	1	14471.1	10	0	0.0544905	No warnings	99.9455	0	0	0	0	0	0	0	0	0	0.0544905							F16
No	205.038	7.87	0.107	2	1	17772.5	10	0	0.113458	No warnings	99.377	0.566131	0	0	0	0	0	0	0	0	0.0568452							F15
No	205.038	7.9	0.102	3	1	15438.4	10	0.1	0.537909	No warnings	99.3336	0	0	0	0	0	5.0643e-06	0	0.642282	0	0.0240798							F14
No	205.038	7.884	0.107	2	1	13830.5	10	0	0.365916	No warnings	99.5437	0	0	0	0	0	2.65667e-06	0	0.452024	0	0.00429494							F8
No	205.038	7.872	0.128	2	1	12104.4	10	0.1	0.632778	No warnings	99.2214	0	0	0	0	0	7.34569e-06	0	0.728957	0	0.0496083							F1
No	205.038	7.868	0.101	2	1	12756.8	10	0.2	1.69136	Contaminating mass	98.3086	0	0	0	0	0	0	0	0	0	1.69136							F6
No	205.038	7.105	0.116	2	1	11125	10	0.2	1.54548	Contaminating mass	98.096	0	0	0	0	0	1.73014e-05	0	1.79264	0	0.111359							F5
No	205.038	7.098	0.103	3	1	27726.6	10	0.6	5.72053	Contaminating mass	91.8238	9.14714e-05	0	1.66302	0	0	3.75584e-05	0	6.45713	0	0.0558889							F7
No	205.038	7.103	0.126	4	1	14515	10	0.6	5.99223	Irregular exchange	89.6119	0	0	0.000130932	0	7.80048	0	0	2.47775	0	0.109747							F15
No	205.038	7.112	0.1	2	1	11194.9	10	0.1	1.08019	Contaminating mass	98.6775	0	0	0	0	0	1.42524e-05	0	1.21155	0	0.110943							F6
No	205.038	7.079	0.127	5	1	14480.3	10	0.8	8.13809	Irregular exchange	83.3999	0	0	2.43803	0	13.1905	0	0	0.800547	0	0.171005							F13
No	205.038	7.095	0.116	2	1	14273	10	0.2	2.17431	No warnings	97.3143	0	0	0	0	0	2.25153e-05	0	2.55702	0	0.128679							F16
No	205.038	7.073	0.094	2	1	21915.6	10	0.2	2.43137	Contaminating mass	97.4358	0	0	0	0	0	2.23957e-05	2.5163e-05	0.663959	0	1.90017							F1
No	205.038	7.082	0.134	3	1	16612.3	10	0.2	2.42783	No warnings	95.8432	0	0	8.66849e-05	0	3.11998	0	0	0.844768	0	0.192004							F14
No	205.038	7.098	0.098	3	1	14056.7	10	0.4	4.34657	Contaminating mass	92.8059	0	0	0.000133559	0	4.80708	0	0	2.21948	0	0.167407							F8
No	205.049	5.443	0.073	1	1	11278	9	0	0.0291028	No warnings	99.9673	0	0	0	0	0	0	0	0.0327407	0								F6
No	205.049	5.462	0.072	2	1	7013.73	9	0	0.0242101	No warnings	99.9728	0	0	0	0	0	0	0	0.0272364	0								F1
No	205.049	5.45	0.074	1	1	7573.05	9	0	0.10112	No warnings	99.8862	0	0	0	0	0	0	0	0.11376	0								F13
No	205.049	5.478	0.068	1	1	16068.9	9	0	0.490926	No warnings	99.4477	0	0	0	0	0	0	0	0.552291	0								F14
No	205.049	5.452	0.065	2	1	30425.6	9	2	22.612	Irregular exchange	71.2563	0	0	4.34298e-05	0	3.09166	8.58356	0	17.0685	0								F16
No	205.049	5.45	0.07	1	1	25200.1	9	2	22.1622	Contaminating mass	72.0377	0	0	0.127396	0	0	11.9169	0	15.6855	0.232516								F8
No	205.049	5.469	0.067	1	1	10625.9	9	0	0.397544	No warnings	99.5528	0	0	0	0	0	0	0	0.447237	0								F15
No	205.049	5.466	0.083	1	1	13403.8	9	0.1	0.923507	No warnings	98.6991	0	0	9.81324e-06	0	0.69858	0	0	0.60233	0								F5
No	205.049	5.481	0.08	1	1	15694.3	9	0	0.344522	Low pattern fit	99.6124	0	0	0	0	0	0	0	0.387587	0								F7
No	205.074	7.103	0.074	6	1	38179	11	0.5	4.13705	No warnings	92.2103	8.86561e-05	0	2.629	0	1.54257	0	0	3.14576	0	0.453829	0.0184778						F15
No	205.074	7.104	0.078	4	1	49639.9	11	0.2	1.86224	Contaminating mass	94.7277	0	0	3.07611	0	2.15037	0	0	0	0	0	0.0458667						F5
No	205.074	7.117	0.078	5	1	47007.4	11	0.2	1.79522	No warnings	95.2079	0	0	3.05661	0	1.3639	0	0	3.65667e-06	0	0.329187	0.0423829						F14
No	205.074	7.113	0.076	7	1	56424.7	11	0.6	5.70456	No warnings	90.1869	0	0	3.77155	0	1.90736	0	0	1.15288	0	0.119014	2.86232						F16
No	205.074	7.117	0.076	5	1	50345.3	11	1.1	10.1678	Irregular exchange	82.9203	0	0	3.43054	0	2.5799	0	0	11.0358	0	0	0.0334304						F13
No	205.074	7.103	0.08	5	1	59207.1	11	0.3	2.89004	Contaminating mass	93.4908	0	0	2.72228	0	2.24101	0	0	1.52865	0	0	0.0172074						F6
No	205.074	7.102	0.066	5	1	47734.9	11	0.3	2.84261	Contaminating mass	93.7728	0.807324	0	1.52458	0	1.768	0	0	2.11755	0	0	0.00975675						F1
No	205.074	7.104	0.069	4	1	52714.8	11	0.2	1.80964	Contaminating mass	95.101	0.298089	0.000112169	1.78349	0	2.78886	0	0	0	0	0	0.0284498						F7
No	205.074	7.129	0.076	5	1	26227.2	11	0.6	5.13716	Contaminating mass	87.3192	0	0	4.66234	0	7.61354	0	0	0	0	0	0.40491						F8
No	205.077	6.814	0.067	2	2	18420.4	8	3.4	42.2517	Low pattern fit	0	2.1309	0.000299568	59.2043	36.8251	1.04519	0	0.610445	0.183774									F16
No	205.077	6.828	0.032	3	2	11676.5	8	4	49.8806	Contaminating mass	0	4.63749	0	69.6601	0	0	2.28803	15.6169	7.79757									F1
No	205.077	6.807	0.064	3	2	29583.3	8	0.8	9.42725	Contaminating mass	71.7271	4.96254	0	23.1897	0	0	0	0.0788337	0.0418088									F5
No	205.077	6.816	0.06	4	2	31435.6	8	4.3	53.1358	Irregular exchange	1.05543	10.3748	0	8.26551	54.8019	4.05633	10.5438	0.0550888	10.8472									F15
No	205.077	6.806	0.06	5	2	37813.4	8	3.8	47.4984	Irregular exchange	1.85053	3.08455	0	22.631	60.3237	5.21551	6.71408	0.0923221	0.0883151									F13
No	205.077	6.804	0.057	6	2	53215.1	8	3.8	47.9127	No warnings	1.89781	2.20956	0	23.8477	59.1276	4.85509	7.72911	0.276837	0.056342									F14
No	205.077	6.797	0.06	3	2	18719.2	8	1.4	18.0291	Contaminating mass	56.5342	6.8964	0	29.8629	0	0	0	5.9042	0.802313									F6
No	205.077	6.807	0.059	3	2	31420.2	8	0.5	5.85196	Contaminating mass	87.1836	1.58772	0	8.74194	0.208535	0	3.07139e-05	0.057468	2.22069									F8
No	205.077	6.812	0.061	3	2	36598.3	8	0.4	4.98996	Contaminating mass	85.0362	3.23433	0	10.7017	0.884364	0	0	0.104442	0.0389709									F7
No	205.086	5.814	0.015	1	1	4206.91	8	0.1	1.81635	No warnings	98.0952	0	0	0	0	0	0.353786	0	1.55101									F15
No	205.086	5.863	0.061	1	1	10865.8	8	0	0.0189189	No warnings	99.9748	0	0	0	0	0	0.0252251	0	0									F5
No	205.086	5.862	0.068	1	1	14116.1	8	0	0.0164123	No warnings	99.9781	0	0	0	0	0	0.0218831	0	0									F7
No	205.086	5.807	0.026	1	1	8785.86	8	0.4	4.55169	No warnings	95.4483	0	0	0	0	0	0	0	4.55169									F16
No	205.086	5.853	0.066	1	1	13401.2	8	0	0.0179426	No warnings	99.9761	0	0	0	0	0	0.0239235	0	0									F8
No	205.095	2.485	0.066	2	2	53320.9	8	0.9	10.6439	Contaminating mass	82.7967	0	0	0	3.2187	12.8348	0	1.0963	0.0534747									F5
No	205.095	2.496	0.072	6	2	76038.2	8	0.6	7.08598	No warnings	83.9522	4.33401	3.2927	1.18106	2.54666	0.558918	0	3.83157	0.302879									F14
No	205.095	2.495	0.075	5	2	103718	8	0.8	9.6798	Irregular exchange	78.6559	4.94065	3.12437	1.44853	3.22945	5.49958	0.267257	2.79011	0.0441756									F15
No	205.095	2.492	0.075	2	2	72568.3	8	0.1	1.4918	Contaminating mass	97.0318	0	0	0	2.94976	0	0	0.0125513	0.00593395									F8
No	205.095	2.499	0.071	3	2	64340.7	8	0.1	1.39156	Contaminating mass	97.3068	0	0	0	2.38341	0.284693	0	0.0250579	0									F7
No	205.095	2.502	0.073	2	2	37198	8	2.9	36.8579	Contaminating mass	52.9707	0	7.43798e-05	0	10.7313	1.07374	0	35.2242	0									F6
No	205.095	2.496	0.07	5	2	60703.7	8	0.3	3.1848	No warnings	87.7956	5.24171	3.15396	1.56005	2.0265	0.209497	0	0.00606242	0.00658981									F13
No	205.095	2.604	0.121	2	2	3596.71	8	2.8	35.1712	Contaminating mass	51.4886	0	0	0.000396124	0	29.1045	0	19.4065	0									F1
No	205.095	2.493	0.076	3	2	49018.2	8	0.3	3.86766	No warnings	93.7159	0	1.54383	0	2.024	0	0	1.97289	0.743428									F16
No	205.095	3.54	0.083	5	1	17512.1	8	0.2	1.94056	No warnings	91.1531	3.93991	3.94205	0.562101	0	0.40283	0	0	0									F15
No	205.095	3.551	0.089	2	1	10372.7	8	0	0	No warnings	100	0	0	0	0	0	0	0	0									F16
No	205.095	3.559	0.082	1	1	19176.2	8	0	0	No warnings	100	0	0	0	0	0	0	0	0									F7
No	205.095	3.574	0.088	1	1	6435.75	8	0	0	No warnings	100	0	0	0	0	0	0	0	0									F6
No	205.095	3.408	1.556	1	1	15374.4	8	0	0.17419	No warnings	99.3032	0	0.696758	0	0	0	0	0	0									F1
No	205.095	3.546	0.092	1	1	13343.4	8	0	0.000947024	No warnings	99.9981	0	0	0	0.00189405	0	0	0	0									F5
No	205.095	3.549	0.086	4	1	14046.8	8	0.4	5.08208	No warnings	87.6659	4.33283	4.32213	0.350755	0	0	0	0	3.32841									F13
No	205.095	3.551	0.079	1	1	17998.3	8	0	0	No warnings	100	0	0	0	0	0	0	0	0									F8
No	205.095	3.557	0.084	4	1	13340.9	8	0.1	1.7362	No warnings	90.8841	4.63232	4.19347	0.290104	0	0	0	0	0									F14
No	205.111	9.113	0.096	1	1	7159.84	5	0.3	6.56648	Contaminating mass	77.7792	18.1606	0.784413	0	3.27574	0												F5
No	205.111	9.117	0.134	1	1	3060.6	5	0.1	1.09204	Low pattern fit	94.5398	5.46019	0	0	0	0												F8
No	205.111	9.13	0.089	2	1	6149.75	5	0.2	3.33817	Contaminating mass	94.4364	0	0	5.56362	0	0												F1
No	205.111	9.113	0.077	2	1	5700.46	5	0.6	12.8511	Low pattern fit	77.2601	1.98211	0	20.7578	0	0												F16
No	205.111	9.106	0.085	2	1	43634.2	5	1.6	31.5328	Irregular exchange	45.2444	3.67692	0.000464281	50.3268	0.751405	0												F14
No	205.111	9.113	0.089	2	1	28106.8	5	1.1	22.4635	Contaminating mass	19.0375	69.5591	6.72148e-05	2.85497	8.54838	0												F6
No	205.111	9.127	0.075	2	1	7878.88	5	0.5	9.29492	Irregular exchange	84.5667	0	0.00044943	15.2576	0.175245	0												F13
No	205.111	9.103	0.081	2	1	21233.9	5	1	20.614	Contaminating mass	56.9402	16.1139	0	20.8279	6.11806	0												F7
No	205.111	9.108	0.064	2	1	4190.97	5	1.1	21.5831	Irregular exchange	64.0282	0	0	35.9718	0	0												F15
No	205.123	11.535	0.051	2	1	138100	10	2.7	26.7594	Contaminating mass	10.5358	0.00116144	77.1959	0	0.0504807	0.521659	0.552082	0.00261342	0	4.34228	6.79799							F1
No	205.123	11.37	0.345	1	1	76798.4	10	1.9	19.1654	Irregular exchange	46.5413	0.0305215	38.6667	0	0.446006	2.15996	2.56027	0.00630734	0	9.58895	0							F14
No	205.123	11.138	0.813	2	1	119248	10	1.9	18.6331	Contaminating mass	27.0109	0.000687555	65.7607	0	0	2.32973	0	1.93965	0	1.4185e-05	2.95829							F7
No	205.123	10.883	1.385	1	1	218696	10	2.2	22.1292	Irregular exchange	4.07203	0.0305033	87.3164	0	0.273949	5.43694	2.57369	0	0	0.0590421	0.237462							F15
No	205.123	10.856	1.654	2	1	259864	10	2.4	24.2638	Low pattern fit	37.607	0	43.6001	0	0.0484727	2.73133	0.557484	0.428607	5.18124e-06	15.0269	0							F13
No	205.123	10.882	1.234	3	1	171695	10	3.6	36.4814	Low pattern fit	8.81682	0	60.2599	2.43685	0.157081	3.83812	1.17793	0.0295684	1.98371e-05	22.9469	0.336819							F16
No	205.123	10.957	1.042	1	1	225219	10	3.6	35.9211	Contaminating mass	30.0321	0	37.4679	0.126739	0.0120474	6.89448	0.599988	0.00200301	0	2.88758	21.9772							F8
No	205.123	11.277	0.039	1	1	24083.6	10	1.6	16.4884	Contaminating mass	30.5175	0	65.5182	0	0	0.712434	0	0	0	2.23335	1.01851							F5
No	205.123	11.345	0.684	1	1	69611.7	10	2.3	22.6793	Contaminating mass	32.5331	0	52.8784	0	0	3.45261	0	0	0	7.5859	3.55							F6
No	205.131	8.545	0.057	2	1	8046.85	9	0	0.385284	Low pattern fit	99.5941	0	0	0	0	0	0	0.0927933	0	0.313112								F16
No	205.131	8.544	0.065	1	1	7808.38	9	2.1	23.7679	Irregular exchange	72.9254	0	0	0	0	0	0	14.88	0	12.1946								F14
No	205.131	8.527	0.064	1	1	6032.24	9	0	0.0499529	No warnings	99.9358	0	0	0	0	0	0	0.0642252	0	0								F8
No	205.131	8.536	0.054	2	1	9512.24	9	0.1	1.07752	No warnings	98.5141	0	0	0.175947	0	0	0	1.30998	0	0								F13
No	205.131	8.527	0.055	1	1	6264.49	9	0	0.243993	Low pattern fit	99.7314	0	0	0	0	0	0	0.110692	0	0.157899								F15
No	205.131	8.531	0.068	1	1	10018.9	9	1.7	18.9938	Contaminating mass	72.9821	0	0	4.54534	0	0	0	22.4725	0	0								F5
No	205.131	8.565	0.066	1	1	8595.32	9	0.1	1.6008	Contaminating mass	97.9371	0	0	0.036631	0	0	0	1.96933	0	0.0568887								F7
No	205.131	8.538	0.064	1	1	6314.11	9	0	0.128702	No warnings	99.8345	0	0	0	0	0	0	0.165474	0	0								F6
No	205.131	8.53	0.071	1	1	7112.91	9	0	0.515022	No warnings	99.2733	0	0	0.112899	0	0	0	0.613786	0	0								F1
No	205.131	5.651	0.056	3	3	50220.2	9	0.1	0.855482	No warnings	98.4622	0	0	2.68867e-05	0	1.52768	0.010144	0	0	0								F14
No	205.131	5.656	0.059	3	3	66255.6	9	0.1	1.45506	No warnings	97.929	0	0	1.20276e-05	0	0.691678	0.0178735	1.36141	0	0								F16
No	205.131	5.663	0.067	2	3	52484.6	9	0.1	1.04796	No warnings	98.6514	0	0	0	0	0	0.00888209	1.33976	0	0								F7
No	205.131	5.645	0.067	2	3	54669.5	9	0.2	2.13332	Contaminating mass	97.2356	0	0	0	0	0.0753744	0	2.689	0	0								F6
No	205.131	5.665	0.067	2	3	75986.1	9	0.1	1.39079	Contaminating mass	98.1234	0.10218	0	0	0	0	0.00581736	1.76858	0	0								F1
No	205.131	5.647	0.054	3	3	42621.1	9	0.1	1.38199	No warnings	97.7259	0	0	3.14968e-05	0	1.74024	0	0.533805	0	0								F13
No	205.131	5.647	0.059	3	3	43445.3	9	0.1	1.20394	No warnings	97.8331	0	0	3.96139e-05	0	2.16662	0	0	0	0.000245576								F15
No	205.131	5.658	0.063	2	3	107010	9	0.1	0.975598	No warnings	98.7261	0	0	0	0	0.0683488	0	1.20552	0	0								F5
No	205.131	5.641	0.064	2	3	57863.3	9	0.1	1.46364	Contaminating mass	98.1156	0	0	0	0	0	0.0183108	1.86586	0	0.000212116								F8
No	205.132	5.156	0.086	2	1	5375.55	9	0	0	No warnings	100	0	0	0	0	0	0	0	0	0								F14
No	205.132	5.153	0.084	2	1	5202.65	9	0	0	No warnings	100	0	0	0	0	0	0	0	0	0								F16
No	205.132	5.154	0.26	1	1	3325.9	9	0	0	No warnings	100	0	0	0	0	0	0	0	0	0								F15
No	205.132	5.201	0.12	1	1	4463.4	9	0	0	No warnings	100	0	0	0	0	0	0	0	0	0								F1
No	205.132	5.16	0.088	1	1	6328.75	9	0	0	No warnings	100	0	0	0	0	0	0	0	0	0								F8
No	205.132	5.16	0.086	2	1	4364.02	9	0	0	No warnings	100	0	0	0	0	0	0	0	0	0								F13
No	205.132	5.17	0.081	1	1	3891.48	9	0	0	No warnings	100	0	0	0	0	0	0	0	0	0								F6
No	205.132	5.178	0.108	1	1	4673.24	9	0	0	No warnings	100	0	0	0	0	0	0	0	0	0								F7
No	205.132	5.151	0.093	1	1	5136.71	9	0	0	No warnings	100	0	0	0	0	0	0	0	0	0								F5
No	205.183	7.714	0.103	2	1	3916.73	14	4.1	29.2403	Contaminating mass	48.8284	0	0	0	0	0	0	0.00838384	51.1632	0	0	0	0	0	0			F8
No	205.183	7.787	0.104	2	1	5478.42	14	3	21.2403	Low pattern fit	62.8288	0	0	0	0	0	0	0.00609005	37.1652	0	0	0	0	0	0			F13
No	205.183	7.769	0.092	2	1	2394.63	14	3.5	24.9632	Contaminating mass	56.3135	0	0	0	0	0	0	0.0071575	43.6794	0	0	0	0	0	0			F1
No	205.183	7.766	0.076	2	1	3233.09	14	2.3	16.1541	Contaminating mass	71.7297	0	0	0	0	0	0	0.00463174	28.2656	0	0	0	0	0	0			F7
No	205.183	7.74	0.086	2	1	4362.98	14	3.2	22.8423	Irregular exchange	60.0252	0	0	0	0	0	0	0.00654938	39.9682	0	0	0	0	0	0			F14
No	205.183	7.735	0.091	2	1	4250.94	14	3.6	25.6958	Irregular exchange	55.0314	0	0	0	0	0	0	0.00736756	44.9612	0	0	0	0	0	0			F16
No	205.183	7.797	0.064	2	1	5392.63	14	3.9	27.9887	Contaminating mass	51.0188	0	0	0	0	0	0	0.00802498	48.9732	0	0	0	0	0	0			F6
No	205.183	7.759	0.091	2	1	3391.45	14	4.5	32.0517	Contaminating mass	43.9084	0	0	0	0	0	0	0.00918992	56.0824	0	0	0	0	0	0			F5
No	205.183	7.784	0.076	2	1	5461.4	14	2.6	18.2419	Low pattern fit	68.0761	0	0	0	0	0	0	0.00523034	31.9187	0	0	0	0	0	0			F15
No	205.183	9.038	0.085	3	1	10128.6	14	2.3	16.617	Contaminating mass	54.8798	0	0	25.6641	0	0	0	0.00318764	19.4529	0	0	0	0	0	0			F7
No	205.183	9.037	0.082	3	1	5825.45	14	2.1	15.3003	Contaminating mass	58.685	0	0	23.2627	0	0	0	0.00295766	18.0494	0	0	0	0	0	0			F8
No	205.183	9.1	0.017	3	1	4627.01	14	3.2	22.842	Contaminating mass	52.8501	0	0.0080612	11.4714	0	0	0	0.00584416	35.6646	0	0	0	0	0	0			F1
No	205.183	9.032	0.087	3	1	8644.64	14	2.7	19.1415	Irregular exchange	56.6599	0	0	15.747	0	0	0	0.00452079	27.5886	0	0	0	0	0	0			F14
No	205.183	9.018	0.087	2	1	4902.88	14	0.7	5.18736	Irregular exchange	78.7977	0	0.00557282	19.3924	0	0	0	0.000295626	1.80409	0	0	0	0	0	0			F13
No	205.183	9.005	0.088	3	1	6259.16	14	2.1	14.7097	Irregular exchange	63.64	0	0	16.9882	0	0	0	0.00317385	19.3687	0	0	0	0	0	0			F15
No	205.183	9.055	0.089	4	1	7657.23	14	2.6	18.2753	Contaminating mass	54.7679	0	0.00156636	21.198	0	0	0	0.00393744	24.0286	0	0	0	0	0	0			F6
No	205.183	9.049	0.097	3	1	11787	14	2	14.4392	Irregular exchange	73.4944	0	0	1.97849	0	0	0	0.00401847	24.5231	0	0	0	0	0	0			F16
No	205.183	9.021	0.113	3	1	9390.05	14	2.4	17.085	Contaminating mass	52.7142	0	0	27.8186	0	0	0	0.00318945	19.4639	0	0	0	0	0	0			F5
No	206.001	2.201	0.085	2	1	41149	8	0	0.0498669	No warnings	99.615	0.382194	0	0	0	0	0.00279027	0	0									F6
No	206.001	2.213	0.082	8	2	75654.1	8	1.3	15.794	No warnings	55.789	11.6693	10.0212	9.18777	5.82299	3.79847	2.03534	0.826452	0.849414									F15
No	206.001	2.214	0.094	5	1	36374	8	0.4	4.69796	No warnings	79.0172	10.475	5.48979	3.94259	1.07532	0	0	0	0									F16
No	206.001	2.195	0.09	2	2	72159.9	8	0	0.372698	No warnings	99.6262	0	0	0	0	0	0.00253209	0.0037926	0.36748									F8
No	206.001	2.211	0.083	8	2	78926.4	8	1.4	17.65	No warnings	51.376	11.4001	11.4621	10.6857	6.67109	4.62557	2.28766	0.654328	0.837525									F14
No	206.001	2.2	0.077	2	2	90215.4	8	0	0.382761	No warnings	99.306	0.355454	0	0	0	0	0.000386182	0.000844913	0.3373									F7
No	206.001	2.21	0.091	2	1	61082.1	8	0	0.000592436	No warnings	99.9953	0.00473949	0	0	0	0	0	0	0									F5
No	206.001	2.223	0.083	9	2	78357.6	8	1.6	19.491	No warnings	50.1614	11.4867	10.3372	10.3932	7.01214	4.70667	2.72031	0.775572	2.40679									F13
No	206.033	5.297	0.081	3	2	42159.2	9	0.1	0.63073	No warnings	99.2675	0	0.0305928	0	0	0	1.6077e-06	0	0.701922	0								F16
No	206.033	5.262	0.072	3	2	30735.7	9	0	0.23216	No warnings	99.7388	0	0	0	0	0	0	0	0.26118	0								F15
No	206.033	5.286	0.082	2	2	37975.4	9	0	0.327557	No warnings	99.6315	0	0	0	0	0	0	0	0.368502	0								F6
No	206.033	5.269	0.073	1	2	26713.3	9	0	0	No warnings	100	0	0	0	0	0	0	0	0	0								F5
No	206.033	5.273	0.074	1	2	25828.4	9	0	0	No warnings	100	0	0	0	0	0	0	0	0	0								F13
No	206.033	5.275	0.076	3	2	30686.4	9	0.6	6.7053	Contaminating mass	93.2922	0	0	0	0	0	0	0	0.0227321	6.68509								F8
No	206.033	5.29	0.079	2	2	43881.3	9	0	0.237084	No warnings	99.7333	0	0	0	0	0	6.10898e-07	0	0.266719	0								F14
No	206.033	5.315	0.106	3	2	41652.6	9	0.1	1.17961	Contaminating mass	98.6729	0	0	0	0	0	3.03952e-06	0	1.32706	0								F1
No	206.033	5.279	0.071	1	2	41587	9	0	0.00371499	No warnings	99.9958	0	0	0	0	0	0	0	0.00417937	0								F7
No	206.033	6.428	0.111	2	1	18701.5	9	0	0.508825	No warnings	99.0931	0	0	1.63748e-05	0	0.891764	0	0	0.0150697	0								F15
No	206.033	6.435	0.107	1	1	16040.3	9	0	0	No warnings	100	0	0	0	0	0	0	0	0	0								F5
No	206.033	6.423	0.087	1	1	19893.8	9	0	0	No warnings	100	0	0	0	0	0	0	0	0	0								F14
No	206.033	6.486	0.11	1	1	15888.3	9	0	0	No warnings	100	0	0	0	0	0	0	0	0	0								F1
No	206.033	6.418	0.095	2	1	18845.2	9	0	0.101473	No warnings	99.7985	0	0	0	0.174613	0	0	0	0.0268504	0								F8
No	206.033	6.419	0.107	2	1	24440.6	9	0.2	2.26338	Contaminating mass	97.7305	0	0	0	0	0.00303604	0	0	0.0431262	2.22336								F7
No	206.033	6.444	0.115	2	1	17211.3	9	0	0.183683	No warnings	99.6694	0	0	6.07103e-06	0	0.330626	0	0	0	0								F6
No	206.033	6.43	0.1	1	1	18997.3	9	0	0	No warnings	100	0	0	0	0	0	0	0	0	0								F16
No	206.033	6.439	0.118	2	1	16138.2	9	0.1	0.726321	No warnings	98.6926	0	0	2.40061e-05	0	1.30736	0	0	0	0								F13
No	206.037	6.034	0.038	2	1	8227.28	7	3.8	53.9761	Contaminating mass	24.5993	0	0	0	37.6919	0.00154479	36.893	0.814204										F5
No	206.037	6.016	0.042	1	1	9371.67	7	5.7	81.0418	Contaminating mass	6.67931	0	0	0	0.122243	0	85.5853	7.61318										F7
No	206.037	5.873	0.048	1	1	6376.11	7	0.7	10.6055	Low pattern fit	86.4531	0	0	0	3.56423	0	9.8975	0.0852189										F13
No	206.037	6.003	0.04	2	1	3590.47	7	5.4	77.5502	Irregular exchange	9.5246	0	0	0	0	0.000852511	90.4745	0										F15
No	206.037	5.919	0.039	1	1	2741.14	7	0.3	3.84222	Contaminating mass	95.5417	0	0	0	0.034882	0	4.20785	0.215559										F8
No	206.037	5.879	0.103	1	1	6665.52	7	1.1	15.4157	Contaminating mass	81.1194	0	0	0	3.07743	0	15.0218	0.781352										F1
No	206.037	6.02	0.031	1	1	3787.8	7	5	71.766	Irregular exchange	15.7545	0	0	0	1.5554	0	82.6901	0										F14
No	206.037	6.021	0.035	1	1	3672.81	7	5.9	84.1644	Irregular exchange	8.12466	0	0	0	0	0.00196878	53.9724	37.901										F16
No	206.037	6.015	0.032	1	1	5436.08	7	5.5	78.9322	Contaminating mass	8.14331	0	0	0	0.251715	0	89.716	1.88893										F6
No	206.067	2.208	0.089	3	1	232367	6	5.4	90.8288	Irregular exchange	5.87854	0.0072309	4.30699	0.641794	0.126313	0.313805	88.7253											F15
No	206.067	2.612	0.068	4	1	109884	6	1.9	31.6591	Contaminating mass	8.08385	6.84885e-05	89.8511	0.388784	0.143653	0.683992	0.848557											F5
No	206.067	2.704	0.069	2	1	106272	6	2.1	34.3185	Contaminating mass	7.95476	2.00464e-05	81.4782	5.13542	0	5.04129	0.390321											F1
No	206.067	2.573	0.069	2	1	56993.5	6	3.1	51.7349	Irregular exchange	37.961	0.000124469	14.0873	1.19	0	1.90499	44.8566											F16
No	206.067	2.216	0.092	5	1	263577	6	5.3	88.9724	Irregular exchange	7.82582	0.000156849	4.1197	0.602728	0.112299	0.698065	86.6412											F14
No	206.067	2.59	0.072	3	1	109497	6	1.3	20.9335	Contaminating mass	49.4618	0.00110832	36.9392	8.8929	0.164656	2.85802	1.68233											F8
No	206.067	2.577	0.069	3	1	23802.5	6	1.3	22.2277	Contaminating mass	38.0506	0.00269998	54.8269	5.94461	0	1.17524	0											F6
No	206.067	2.579	0.063	3	1	46518.7	6	0.8	12.8085	Contaminating mass	78.3917	0.00354492	5.64097	9.3355	0	2.21074	4.41758											F7
No	206.067	2.6	0.066	2	1	12424	6	0	0.687862	Low pattern fit	97.9364	0	2.06359	0	0	0	0											F13
No	206.068	5.526	0.015	2	2	54687.8	4	1.6	39.9997	Contaminating mass	19.4393	1.12249	79.4382	0	0													F7
No	206.068	5.412	0.029	2	2	51525.4	4	1.9	48.6419	No warnings	3.29155	0.000119311	95.5575	1.15083	0													F16
No	206.068	5.468	0.152	2	2	10540.3	4	1.2	31.1226	Contaminating mass	37.7548	0	62.2452	0	0													F5
No	206.068	5.459	0.053	2	2	10862.9	4	1.5	38.7338	Irregular exchange	22.5554	0	77.4216	0	0.0229992													F13
No	206.068	5.271	0.025	2	2	13840.3	4	1.3	32.0654	Contaminating mass	37.466	0	60.9083	0.0580017	1.56773													F1
No	206.068	5.493	0.037	2	2	7369.33	4	0.7	16.4958	Contaminating mass	67.6812	0.000893583	30.9715	1.34645	0													F6
No	206.068	5.468	0.058	2	2	5945.7	4	0.5	12.7543	Contaminating mass	74.4914	0	25.5086	0	0													F8
No	206.068	5.286	0.027	1	2	17990.2	4	1.7	42.8261	Irregular exchange	14.3478	0	85.6522	0	0													F14
No	206.068	5.46	0.028	1	2	2291.05	4	0	0	No warnings	100	0	0	0	0													F15
No	206.069	5.687	0.083	2	1	77999.8	3	1.4	47.3183	No warnings	43.1807	11.7763	4.95025	40.0927														F15
No	206.069	5.742	0.086	2	1	13858.6	3	0	1.03399	Low pattern fit	98.4808	0.727792	0	0.791397														F5
No	206.069	5.678	0.085	2	1	64239.7	3	1.2	39.7472	Contaminating mass	29.5858	46.0004	0	24.4138														F7
No	206.069	5.683	0.075	1	1	14174.3	3	0.1	3.4138	Low pattern fit	91.3771	7.81361	0	0.809262														F16
No	206.069	5.702	0.106	1	1	12926.9	3	0.8	28.1556	Irregular exchange	71.8444	0	0	28.1556														F13
No	206.069	5.74	0.098	2	1	13768.5	3	0	1.43611	Low pattern fit	97.0905	2.21003	0	0.69943														F1
No	206.069	5.655	0.113	2	1	17362.7	3	0.1	2.23896	Low pattern fit	94.2362	5.2872	0	0.476561														F6
No	206.069	5.693	0.102	1	1	29159.8	3	0	0.638667	Low pattern fit	99.2118	0.224314	0	0.563896														F8
No	206.069	5.697	0.081	2	1	29029.5	3	0.2	5.7717	No warnings	83.8495	15.5682	0	0.58228														F14
No	206.069	3.133	0.08	3	1	67405.2	10	0.7	6.63212	Irregular exchange	90.0334	0	0	0.00010812	0	5.09603	4.05116e-06	0	2.99334	1.8771	0							F15
No	206.069	3.163	0.078	3	1	28109.8	10	0.4	3.62169	Contaminating mass	95.4491	0	0	0	1.15758e-06	0	0.0951949	0	4.45571	0	0							F6
No	206.069	3.165	0.083	3	1	142758	10	4.9	49.4956	Irregular exchange	30.1334	0	0	0.000543021	0	25.5942	0	0.000172366	31.4631	12.8086	0							F14
No	206.069	3.134	0.084	3	1	129719	10	0.8	7.65399	Contaminating mass	90.5801	0	0	0	1.16161e-06	0	0.195362	0	7.69159	1.49475	0.0382268							F5
No	206.069	3.151	0.077	3	1	77854.1	10	0.6	6.49871	Contaminating mass	92.4521	0	0	0	0	0	1.15351e-05	0	2.94413	4.60378	0							F7
No	206.069	3.153	0.08	3	1	22064.4	10	0.1	1.363	No warnings	97.274	0	0	5.78355e-05	0	2.72596	0	0	0	0	0							F16
No	206.069	3.167	0.083	3	1	133415	10	1.8	18.2745	Contaminating mass	69.5283	0	0	0.000439048	0	20.6936	0	0	8.88253	0.7357	0.159389							F8
No	206.069	3.319	0.076	3	1	99043.6	10	6.3	62.683	Contaminating mass	27.2254	0	3.1821e-05	0	1.03073	0	0.0323544	0	22.8908	48.8207	0							F1
No	206.069	3.172	0.074	3	1	31128.1	10	1.4	13.6789	Irregular exchange	77.96	0	0	0.000279563	0	13.1766	0	0	8.86313	0	0							F13
No	206.069	4.424	0.09	2	1	12704.6	10	1.3	13.0445	Contaminating mass	83.6937	0	0	0	0	0.00178835	0	0	16.3045	0	0							F6
No	206.069	4.376	0.093	3	1	54628.7	10	1.7	16.9093	Irregular exchange	78.5894	0	0	0	0.00525285	0.89805	0.292416	0	19.1069	1.10797	0							F13
No	206.069	4.396	0.097	2	1	11779.9	10	1.3	12.6992	Contaminating mass	84.1259	0	0	0	0	0	6.21946e-05	0	15.874	0	0							F5
No	206.069	4.357	0.102	3	1	57760.4	10	2.3	22.886	Irregular exchange	71.4128	0	0	0	8.09506e-06	0.832201	0.0845165	0	24.8433	2.8272	0							F15
No	206.069	4.38	0.09	3	1	53996.6	10	1.8	18.2362	Irregular exchange	75.1411	0	0	0.000126075	1.18943e-06	5.94227	0.087214	0	17.3369	1.49243	0							F16
No	206.069	4.366	0.111	2	1	16694.6	10	1.8	17.9163	Contaminating mass	77.6042	0	0	0	0.000891552	0	8.20517e-05	0	22.3948	0	0							F8
No	206.069	4.437	0.101	2	1	32817.7	10	1.5	14.9718	Contaminating mass	81.289	0	0	0	0	0.00145754	0	0	18.6756	0.0340117	0							F7
No	206.069	4.374	0.094	2	1	14238.8	10	1.2	11.9508	Irregular exchange	85.0602	0	0	0	0.00251993	0	4.2437e-05	0	14.9372	0	0							F14
No	206.078	6.247	0.054	2	2	24837.6	5	1.3	26.2411	Contaminating mass	34.3973	0	65.6027	0	0	0												F7
No	206.078	6.249	0.032	1	2	5832.49	5	0.9	18.1297	Contaminating mass	54.6748	0.00172982	45.3235	0	0	0												F6
No	206.078	6.123	0.033	2	2	13554.3	5	1.7	33.9608	Contaminating mass	19.6592	0	75.7798	0	4.56108	0												F8
No	206.078	6.42	0.164	1	2	8727.51	5	3.2	64.6531	Contaminating mass	0	0.0017733	38.3645	0	61.6337	0												F1
No	206.078	6.236	0.004	3	2	6949.92	5	2	40.7938	Irregular exchange	19.5446	0.755772	57.7924	0.000430972	21.9068	0												F15
No	206.078	6.256	0.047	2	2	20652.4	5	1.3	26.3233	Contaminating mass	34.1917	0.000180464	65.8081	0	0	0												F5
No	206.078	6.222	0.01	3	2	5732.57	5	1.7	34.0289	Irregular exchange	14.5972	0.660859	84.7419	0	0	0												F16
No	206.078	6.106	0.068	3	2	5377.62	5	2.1	42.4081	Irregular exchange	15.0642	0.355054	63.3188	0	21.2619	0												F14
No	206.078	6.153	0.027	3	2	4015.08	5	1.8	35.0418	Irregular exchange	11.9566	0.877855	87.1656	0	0	0												F13
No	206.091	2.834	0.08	3	2	39237.4	7	0.7	10.2153	Contaminating mass	88.4513	0	0	0.000276705	1.65568	2.18277	0	7.70997										F5
No	206.091	2.51	0.065	4	2	90983.3	7	2.6	36.4575	Contaminating mass	16.084	0	55.1474	2.80672e-05	17.3023	2.28242	0	9.18374										F6
No	206.091	2.79	0.072	5	2	193324	7	2.4	34.4198	Irregular exchange	31.5852	6.18413	24.5957	5.92684	17.3951	0.994408	0	13.3185										F15
No	206.091	2.577	0.072	4	2	30862.5	7	3.8	54.548	Contaminating mass	0.0015208	0	42.736	1.98284e-05	19.5658	22.8876	2.05331e-06	14.809										F1
No	206.091	2.825	0.083	5	2	62284.4	7	1.2	17.5416	Contaminating mass	70.0609	0	7.39699	0.000153152	14.762	2.75568	0	5.02428										F7
No	206.091	2.522	0.084	4	2	126150	7	2.2	31.6311	Irregular exchange	26.2344	1.49098	48.0466	0.219722	13.0661	2.84291	0	8.09932										F16
No	206.091	2.811	0.071	5	2	135911	7	1.6	23.2428	Irregular exchange	42.7814	17.5649	14.8333	2.57597	15.8942	0.144145	0	6.20609										F13
No	206.091	2.786	0.075	4	2	60583.8	7	3.3	47.2811	Irregular exchange	13.835	0	34.2417	0.0643802	26.4116	10.7429	0	14.7043										F14
No	206.091	2.501	0.075	4	2	90242.9	7	3.8	54.2445	Contaminating mass	12.2444	1.76556	28.1557	0.00176164	15.545	18.2821	0	24.0055										F8
No	206.094	9.902	0.088	2	1	6133.59	12	1.9	15.9313	Contaminating mass	82.558	0	0	0	0	0	0	0	2.45925e-06	1.9381e-05	0.686394	16.7556	0					F5
No	206.094	9.915	0.07	3	1	8313.55	12	1.7	14.0825	Irregular exchange	84.1353	0	0	3.94948e-05	0	0.920116	0	0	0	5.03623e-06	0	14.9445	0					F14
No	206.094	10.009	0.543	2	1	7788.44	12	3.3	27.2863	Irregular exchange	70.2125	0	0	0	0	0	0	0	1.62621e-06	3.36673e-05	0.453886	29.1067	0.226943					F15
No	206.094	9.904	0.074	3	1	10826.2	12	1.6	13.5177	Contaminating mass	85.0163	0	0	0	0	0	0	9.48113e-06	0	1.30406	0	13.6796	0					F1
No	206.094	9.937	0.078	2	1	8560.5	12	1.3	10.6268	Contaminating mass	88.4071	0	0	0	0	0	0	0	0	1.34093e-05	0	11.5929	0					F8
No	206.094	9.933	0.077	2	1	6191	12	1	8.42946	Irregular exchange	90.8042	0	0	0	0	0	0	0	0	1.06366e-05	0	9.19577	0					F16
No	206.094	9.931	0.078	3	1	5633.24	12	0.5	4.30184	No warnings	92.2608	0.000137686	0.00109159	3.37224	0	1.08661	0	0	0	3.79289e-06	0	3.27909	0					F13
No	206.094	9.996	0.235	2	1	3112.19	12	1.6	13.3548	Contaminating mass	85.4311	0	0	0	0	0	0	0	0	1.68516e-05	0	14.5688	0					F6
No	206.095	3.645	0.024	4	1	7625.54	12	6.4	53.0359	Contaminating mass	29.9115	0.000255878	0.00202863	13.8232	0	0	0	8.77573e-05	0	11.9684	0	44.2946	0					F8
No	206.095	3.672	0.029	4	1	6751.84	12	7.4	61.5412	Contaminating mass	22.0867	0	0	10.5543	0	0	0	0.000124997	0	17.0588	0	50.3001	0					F7
No	206.095	3.96	0.056	3	1	23792	12	8.2	68.0444	Irregular exchange	0	0.000356985	0.00283022	8.74324	0	0	0.000451679	0	71.1633	8.17875e-06	0	20.0898	0					F16
No	206.095	4.044	0.093	4	1	68028.6	12	7.5	62.3379	Irregular exchange	7.91301	0	0	6.23737	0	0	0.000281538	0.000165705	70.8755	1.18716	0	13.7865	0					F13
No	206.095	3.525	0.077	2	1	2615.23	12	6.9	57.2591	Contaminating mass	37.5355	0	0	0	0	0	0	0	0	7.22518e-05	0	62.4644	0					F1
No	206.095	4.015	0.036	5	1	73857.7	12	6.6	54.8385	Contaminating mass	18.4904	3.54748e-05	0.000281248	3.60974	0	0	0	0.00025806	67.8722	3.02248	0	7.0046	0					F6
No	206.095	3.679	0.133	4	1	7314.22	12	7.5	62.1976	Irregular exchange	12.8895	0	0	25.8125	0	0	0	1.91958e-05	0	2.67201	0	58.626	0					F15
No	206.095	3.272	0.847	5	1	105867	12	7.2	59.7163	Contaminating mass	11.3935	4.93436e-05	0.000391201	5.02071	0	0	0	0.000257441	70.7799	2.78296	0	10.0222	0					F5
No	206.095	3.676	0.026	3	1	2992.99	12	5.1	42.7306	Irregular exchange	0	0.00287223	0.0227713	70.3463	0	0	0	8.89052e-05	0	12.1145	0	17.5135	0					F14
No	206.098	6.852	0.084	2	1	102993	9	6.1	68.0708	Irregular exchange	5.92383	10.6872	4.63348	0	0	3.57282e-07	0	56.8845	2.34742	19.5235								F16
No	206.098	6.544	0.055	2	1	37015.5	9	1	10.8857	Contaminating mass	85.079	0	2.1367	0	0	0	0	10.6701	0.0213527	2.09288								F5
No	206.098	6.478	0.104	2	1	69926.9	9	2.4	26.6837	Contaminating mass	59.0147	0	10.6331	0	0	0	0	27.1418	0	3.21046								F7
No	206.098	6.483	0.065	1	1	11322.7	9	0.7	8.26197	Contaminating mass	86.1986	0	4.78887	0	0	0	0	8.1663	0	0.846211								F6
No	206.098	6.47	0.123	1	1	46212.7	9	1.5	16.6033	Contaminating mass	75.5466	0	5.62468	0	0	0	0	15.639	0	3.18974								F8
No	206.098	6.499	0.058	1	1	6075.53	9	0.5	5.30584	Contaminating mass	80.6572	0	18.0475	0	0	0	0	0	0	1.29529								F1
No	206.098	6.629	0.086	1	1	28334.1	9	6.9	77.011	Irregular exchange	5.4589	0	5.34688	0	0	0	0	57.8399	4.66278	26.6915								F14
No	206.098	6.636	0.073	2	1	28034.6	9	3	33.7915	Irregular exchange	55.0551	0	4.51059	0	0	0	0	34.066	0.674845	5.69353								F13
No	206.098	6.623	0.336	2	1	40715.4	9	6.2	69.0558	Irregular exchange	1.24554	2.00069	13.7206	0	3.16918	0	0	67.2509	4.89008	7.72302								F15
No	206.109	6.498	0.022	2	1	4669.88	16	8.3	51.9106	Contaminating mass	6.91576	0	0	0	0	0	0	0.0264689	71.2944	2.11509e-07	0.00143933	14.8843	0	0.000108157	6.87755	0	0	F8
No	206.109	6.404	0.06	3	1	7570.07	16	2.4	14.7505	Contaminating mass	75.1819	0	0	0	0	0	0	0.00457545	12.324	0	0	12.4895	0	0	0	0	0	F1
No	206.109	6.319	0.035	3	1	2513.07	16	11.4	71.3945	Irregular exchange	0	0	0	0	0	0	0	0.00865677	23.3171	0	0	39.2417	0	0	37.4326	0	0	F14
No	206.109	6.486	0.014	2	1	1162.24	16	9.9	62.1364	Contaminating mass	0	0	0.0201702	13.2035	0	0	0	0	0	1.23299e-06	0.00839058	86.7679	0	0	0	0	0	F7
No	206.109	6.324	0.057	3	1	3276.48	16	11.8	73.6772	Irregular exchange	0	0	0	0	0	0	0	0.00378207	10.1871	0	0	53.3386	0	0	36.4705	0	0	F13
No	206.116	7.883	0.081	1	3	9123.96	4	0	0.091266	No warnings	99.8322	0	0.153037	0	0.0147477													F8
No	206.116	7.884	0.087	2	3	9302.01	4	0.3	8.33963	Contaminating mass	83.3259	0.000143074	16.6687	0	0.0052704													F6
No	206.116	7.873	0.116	1	3	6086.49	4	0	0.0664597	No warnings	99.8834	0	0.100208	0	0.0163557													F1
No	206.116	7.884	0.081	2	3	26990.7	4	0.1	2.89326	Contaminating mass	94.2216	0	5.77029	0	0.00811713													F5
No	206.116	7.887	0.061	3	3	45676.7	4	0.1	3.72515	No warnings	90.4791	6.74964	0.165592	2.60271	0.00290554													F14
No	206.116	7.914	0.077	2	3	6628.4	4	0	0.330755	No warnings	99.0234	0.658367	0.304063	0	0.0141316													F16
No	206.116	7.891	0.095	2	3	6472.77	4	0	0.872379	No warnings	96.6546	3.22562	0.107591	0	0.0121769													F13
No	206.116	7.862	0.017	2	3	5673.56	4	0.2	5.42217	Irregular exchange	89.1806	0	10.7944	0	0.0249722													F15
No	206.116	7.886	0.082	2	3	13644.7	4	0.2	4.23508	Contaminating mass	91.5161	0.225215	8.15985	0	0.0988514													F7
No	206.116	6.137	0.115	3	2	7417.54	4	1.9	48.4308	Contaminating mass	31.5391	0	12.1484	55.8238	0.488721													F1
No	206.116	6.074	0.105	3	2	11577.7	4	2.3	58.068	Contaminating mass	20.6302	0	5.83812	73.5308	0.000862419													F6
No	206.116	6.116	0.059	4	2	24540.2	4	1.5	37.3073	Irregular exchange	49.2206	1.94959	5.48692	37.0659	6.27704													F15
No	206.116	6.154	0.104	2	2	15377.7	4	2.1	52.5623	Contaminating mass	29.9164	0	0.00152812	70.0821	0													F7
No	206.116	6.119	0.125	2	2	12109.2	4	2.4	60.5066	Contaminating mass	19.3239	0	0.00176156	80.6743	0													F5
No	206.116	6.119	0.061	2	2	18571.6	4	0.7	16.5737	Irregular exchange	78.1337	0	0.0634862	21.0433	0.759486													F13
No	206.116	6.123	0.061	2	2	29413.5	4	1.5	36.3553	Irregular exchange	51.786	0	0.155087	47.1246	0.934289													F16
No	206.116	6.117	0.06	2	2	29340.2	4	1.2	29.0861	Irregular exchange	61.4657	0	0.102241	37.5882	0.843886													F14
No	206.116	6.1	0.067	2	2	16647.3	4	2.4	58.9369	Contaminating mass	21.4169	0	0.00170199	78.5814	0													F8
No	206.134	10.172	0.027	1	1	1121.61	10	0	0	No warnings	100	0	0	0	0	0	0	0	0	0	0							F6
No	206.134	10.187	0.091	1	1	3695.71	10	0	0	No warnings	100	0	0	0	0	0	0	0	0	0	0							F5
No	206.134	10.189	0.053	2	1	7982.09	10	0	0	No warnings	100	0	0	0	0	0	0	0	0	0	0							F8
No	206.134	10.187	0.068	1	1	1926.03	10	0	0	No warnings	100	0	0	0	0	0	0	0	0	0	0							F14
No	206.134	10.19	0.059	1	1	2045.56	10	0	0	No warnings	100	0	0	0	0	0	0	0	0	0	0							F16
No	206.134	10.197	0.044	1	1	3472.93	10	0	0	No warnings	100	0	0	0	0	0	0	0	0	0	0							F7
No	206.134	10.19	0.054	1	1	6306.29	10	0	0	No warnings	100	0	0	0	0	0	0	0	0	0	0							F13
No	206.152	8.191	0.11	5	2	69492.1	10	0.6	5.72656	Contaminating mass	82.4812	0	2.10767	12.2575	0	3.02609	0	0	0	0.127467	0							F5
No	206.152	8.187	0.11	6	2	41347.9	10	0.3	2.82867	Irregular exchange	93.4218	0	1.26595	0.403312	0	4.90897	0	0	0	0	0							F15
No	206.152	8.17	0.106	6	2	55461.2	10	0.5	5.01717	Contaminating mass	85.3841	0.467288	1.97937	7.62092	0	4.51299	0	0	0	0.0353303	0							F7
No	206.152	8.171	0.114	5	2	49422.5	10	0.3	2.9243	Contaminating mass	91.1796	0	2.15945	4.19044	0	2.47056	0	0	0	0	0							F6
No	206.152	8.176	0.105	5	2	42705	10	0.3	3.12126	Irregular exchange	93.1267	0	0	1.65699	0	5.17622	0	0	0	0.0400621	0							F14
No	206.152	8.176	0.112	5	2	50199.8	10	0.2	1.68395	Contaminating mass	95.2492	0	2.06744	0.37713	0	2.29573	0	0	0	0.0105119	0							F8
No	206.152	8.213	0.123	5	2	48167.5	10	0.2	2.28495	No warnings	93.6443	0	1.30195	2.54517	0	2.4918	0	0	0	0.0167934	0							F16
No	206.152	8.205	0.114	6	2	46028.7	10	0.3	3.3221	No warnings	91.5855	0	0.152726	4.32177	0	3.87734	0	0	0	0.0626135	0							F13
No	206.152	8.179	0.132	5	2	67226.8	10	0.2	2.26143	Contaminating mass	92.8183	0	2.84799	2.655	0	1.53882	0	0	0	0.13992	0							F1
No	206.152	8.807	0.071	5	4	108259	10	0.2	1.7826	No warnings	95.4679	0	0	2.19502	1.51255	0.406964	0	0.313003	0	0.0807941	0.0237741							F16
No	206.152	8.797	0.068	5	4	141310	10	0.3	3.12629	Contaminating mass	92.533	0	0	3.64129	2.91745	0	0	0.0969609	0	0.122325	0.688961							F8
No	206.152	8.805	0.068	3	4	191888	10	1.1	10.8147	Contaminating mass	84.6642	0	0	2.66671	0.0878833	4.76643	0.000123547	0.496701	0	0.69354	6.62438							F5
No	206.152	8.804	0.069	4	4	188817	10	0.9	8.88017	Contaminating mass	80.886	0.293438	1.12037	6.08223	1.55876	7.14338	0	0.418178	1.43292e-07	1.83466	0.662966							F6
No	206.152	8.813	0.072	4	4	231454	10	0.5	4.57629	Contaminating mass	94.4527	0	0	0	0.563159	3.14715e-06	0	1.29532	0	2.44476	1.24401							F1
No	206.152	8.806	0.068	3	4	149589	10	0.6	6.16408	Contaminating mass	87.7376	0	0	2.31707	0.0974108	8.81628	0	0.00186162	0	0.0918133	0.937923							F7
No	206.152	8.805	0.065	3	4	86705.9	10	0.4	4.32562	No warnings	91.6414	0	0	3.60157	0.971719	0.998256	0	0.00399401	2.119	0.0469598	0.617075							F14
No	206.152	8.804	0.073	5	4	135924	10	0.3	2.84077	No warnings	93.1632	0.0145899	0	3.71007	0.892964	1.36375	3.60981e-05	0.0522745	0.735729	0.0537906	0.0136183							F13
No	206.152	8.821	0.071	5	4	79354.7	10	0.3	3.26948	No warnings	91.3299	0	0	4.04018	3.1673	1.32995	0	0.00272294	0	0.0629919	0.0669313							F15
No	207.04	3.682	0.1	2	1	1933.73	7	1.4	19.9037	Contaminating mass	80.0963	0	0	0	0	4.59624e-05	8.96299e-05	19.9036										F6
No	207.04	3.623	0.112	2	1	3920.44	7	0.9	12.3996	Contaminating mass	87.6004	0	0	0	0	0	0	12.3996										F8
No	207.04	3.633	0.112	2	1	3244.13	7	0.7	10.0006	Irregular exchange	89.9993	0	0	0	0	2.30939e-05	4.50346e-05	10.0006										F16
No	207.04	3.623	0.097	3	1	3884.9	7	0.5	7.77997	Irregular exchange	92.22	0	0	0	0	1.79658e-05	3.50345e-05	7.77992										F15
No	207.04	3.66	0.13	1	1	1865.51	7	0	0	No warnings	100	0	0	0	0	0	0	0										F5
No	207.04	3.65	0.119	1	1	2777.89	7	0	0	No warnings	100	0	0	0	0	0	0	0										F13
No	207.04	3.648	0.11	1	1	3401.23	7	0	0	No warnings	100	0	0	0	0	0	0	0										F7
No	207.04	3.641	0.103	2	1	3370.97	7	0.6	9.10782	Irregular exchange	90.8922	0	0	0	0	2.10321e-05	4.10141e-05	9.10777										F14
No	207.053	7.336	0.07	3	1	13779.1	10	3.2	32.2375	Contaminating mass	59.7482	0	0	0	0	0	2.08715e-05	0.000142976	39.8902	0.361357	0							F7
No	207.053	7.389	0.124	2	1	4709.55	10	1.3	12.7599	Irregular exchange	84.0501	0	0	0	0	0	8.32154e-05	0	15.9498	0	0							F16
No	207.053	7.402	0.113	2	1	6634.87	10	1.4	13.6845	Irregular exchange	82.8944	0	0	0	0	0	8.92451e-05	0	17.1056	0	0							F15
No	207.053	7.402	0.094	2	1	7370.5	10	1.2	11.9722	Irregular exchange	85.0348	0	0	0	0	0	7.80778e-05	0	14.9651	0	0							F13
No	207.053	7.404	0.108	2	1	7257.96	10	2.4	24.2582	Irregular exchange	69.6773	0	0	0	0	0	0.000158202	0	30.3226	0	0							F14
No	207.053	7.356	0.075	3	1	12321.2	10	4.5	44.7054	Contaminating mass	44.1423	0	0	0	0	0	6.13929e-05	0.000173461	55.6653	0.19215	0							F8
No	207.053	7.352	0.065	3	1	9399.79	10	4.8	47.7857	Contaminating mass	40.5503	0	0	0	0	0	3.09484e-05	0.000214098	57.1903	2.25918	0							F1
No	207.053	7.374	0.07	3	1	14120.4	10	4.7	46.9593	Contaminating mass	41.3721	0	0	0	0	0	0.000100203	0.000155792	58.0571	0.570577	0							F6
No	207.053	7.369	0.079	2	1	15974.3	10	4.6	45.8748	Contaminating mass	42.6554	0	0	0.00166424	0	0	0.000203785	0	57.3428	0	0							F5
No	207.053	5.908	0.077	3	1	15682.8	10	1.6	15.5182	Contaminating mass	73.5524	0	0	11.2796	0	0	7.91355e-05	0	15.1679	0	0							F7
No	207.053	5.976	0.077	3	1	12018.1	10	1.4	14.336	Irregular exchange	68.5658	0	0	21.6227	0	0	5.11893e-05	0	9.81142	0	0							F14
No	207.053	5.955	0.079	3	1	15274	10	3.5	34.7436	Irregular exchange	52.0836	0	0	7.17884	0	0	0.000212539	0	40.7373	0	0							F13
No	207.053	5.929	0.068	3	1	26621.2	10	3.9	38.7743	Irregular exchange	46.6062	0	0	5.24418	0	4.39542	0	0	43.7542	0	0							F16
No	207.053	5.922	0.076	4	1	13399.7	10	1.6	16.2286	Irregular exchange	73.635	0	0	9.66006	0	0	0.166744	0	16.5382	0	0							F15
No	207.053	5.94	0.074	2	1	7872.29	10	1.5	14.9135	Contaminating mass	81.3581	0	0	0	0	0	9.72599e-05	0	18.6418	0	0							F1
No	207.053	5.938	0.07	3	1	11207.7	10	2.2	22.3593	Contaminating mass	69.4351	0	0	4.18522	0	0	0.00013763	0	26.3796	0	0							F6
No	207.053	5.977	0.081	3	1	15385.7	10	4	40.1395	Contaminating mass	46.8735	0	0	4.72333	0	0	0.000252534	0	48.403	0	0							F5
No	207.053	5.961	0.078	1	1	8002.28	10	0	0	No warnings	100	0	0	0	0	0	0	0	0	0	0							F8
No	207.053	6.614	0.079	2	1	22648.6	3	0.6	18.5818	Irregular exchange	81.0214	0.595202	0	18.3834														F14
No	207.053	6.664	0.082	3	1	11889.8	3	0.4	14.0285	Contaminating mass	84.9302	1.56184	0	13.5079														F1
No	207.053	6.671	0.079	2	1	12713.8	3	0.6	18.5736	Irregular exchange	79.6536	2.65916	0	17.6872														F15
No	207.053	6.634	0.083	2	1	14441.4	3	0.6	21.1723	Contaminating mass	77.3065	2.28191	0	20.4116														F8
No	207.053	6.658	0.079	3	1	13820.4	3	0.4	13.8805	Contaminating mass	86.1195	0	0	13.8805														F6
No	207.053	6.67	0.085	2	1	15758.3	3	0.8	26.9638	Contaminating mass	70.102	4.40141	0	25.4966														F7
No	207.053	6.653	0.086	3	1	11070	3	0.5	15.7977	Irregular exchange	84.2023	0	0	15.7977														F13
No	207.053	6.648	0.095	3	1	8689.2	3	0.6	19.6698	Contaminating mass	77.8169	3.7698	0	18.4132														F5
No	207.053	6.661	0.084	3	1	9212.05	3	0.6	20.5667	Irregular exchange	79.2458	0.281349	0	20.4729														F16
No	207.09	8.008	0.071	4	1	23951.4	11	3.2	29.2875	Contaminating mass	48.0988	0.0639647	0	18.5198	0	0	0.000256472	0	33.3171	0	0	0						F5
No	207.09	7.999	0.072	8	1	20149	11	2.5	23.1123	Irregular exchange	55.0785	2.88318	1.35479	4.07694	0	19.0857	0	0	17.1164	0	0.397016	0.00747025						F13
No	207.09	7.994	0.071	5	1	33058	11	3.3	30.0308	Contaminating mass	48.3701	0	0	2.25527	0	23.8381	0	0	25.5064	0	0	0.0301636						F8
No	207.09	8.001	0.066	7	1	18051.6	11	3.4	30.7907	Irregular exchange	42.0813	1.08218	0	1.52814	0	37.1028	0	0	17.2808	0	0.902105	0.022689						F16
No	207.09	8.006	0.064	4	1	20170.6	11	4.1	36.9335	Contaminating mass	28.9041	0	0	5.85613	0	44.4452	0	0	20.7556	0	0	0.0389673						F6
No	207.09	7.982	0.066	2	1	2817.11	11	3.6	32.4369	Contaminating mass	55.3992	0	0	0	0	0	0.000343331	0	44.6005	0	0	0						F1
No	207.09	7.997	0.071	4	1	21735.1	11	2.8	25.1977	Contaminating mass	56.963	0.345256	0	12.9516	0	0	0.000228795	0	29.7218	0	0	0.0181365						F7
No	207.09	7.982	0.069	8	1	17267	11	2.6	23.6543	Irregular exchange	63.0292	3.75247	2.61051	2.81246	0	0	0.135188	0	17.5991	1.80225	5.88503	2.37381						F15
No	207.09	7.978	0.068	5	1	18455.2	11	2.3	20.6274	Irregular exchange	65.0087	2.56006	1.69466	0	0	8.31526	0	0	22.4198	0	0	0.00152111						F14
No	207.101	6.119	0.056	2	1	1318.84	4	2	49.4368	No warnings	0.0002988	2.25238	97.7473	0	0													F16
No	207.101	6.059	0.024	4	1	5377.02	4	0.5	13.1418	No warnings	71.6392	8.11148	16.2921	3.95722	0													F15
No	207.101	6.022	0.013	2	1	1387.68	4	0.8	19.9777	No warnings	20.0891	79.9109	0	0	0													F13
No	207.101	5.946	0.122	1	1	9041.86	4	2	49.9998	Contaminating mass	0.000193818	0.000456205	99.9993	0	0													F1
No	207.101	6.05	0.027	3	1	5225.09	4	0.7	16.5777	Irregular exchange	69.1994	13.0456	0	17.755	0													F14
No	207.101	6.05	0.034	2	1	4147.04	4	0.1	1.47272	No warnings	94.1091	5.89089	0	0	0													F7
No	207.101	6.052	0.018	3	1	3427.85	4	1.1	27.4643	Contaminating mass	45.0714	0	54.9286	0	0													F6
No	207.101	6.117	0.145	1	1	3944.82	4	2	49.9999	Contaminating mass	0.000263608	0	99.9997	0	0													F5
No	207.101	5.917	0.048	1	1	1660.02	4	2	49.9999	Contaminating mass	0.000263608	0	99.9997	0	0													F8
No	207.101	6.724	0.073	3	2	13329.4	10	3.5	34.6401	Irregular exchange	31.868	0.00740006	31.0757	0.0407245	0	17.1894	0	0	1.12781e-05	0.015956	19.8029							F13
No	207.101	6.755	0.067	3	2	5370.93	10	3.1	30.7925	Contaminating mass	58.0208	0.000171534	0.725031	0	0	21.2109	0	0	1.14517e-05	0.011635	20.0315							F1
No	207.101	6.736	0.063	2	2	7867.1	10	1.2	12.0157	Contaminating mass	70.0312	0	10.0568	0.0237446	0	19.7556	0	0	0	0.132656	0							F7
No	207.101	6.738	0.065	3	2	7972.22	10	1.9	19.1179	Irregular exchange	57.5936	0.00450774	19.0531	0	0	16.0802	0	0	4.12109e-06	0.0190707	7.2495							F14
No	207.101	6.759	0.074	3	2	5145.71	10	2.9	28.895	Contaminating mass	67.2502	0	0	0.0001246	0	7.70948	0	0	1.42747e-05	4.22811e-05	25.0401							F8
No	207.101	6.722	0.07	3	2	7687.47	10	3	29.7469	Contaminating mass	45.4446	0.00455814	19.2661	0	0	18.7819	0	0	9.39934e-06	0.00533407	16.4975							F6
No	207.101	6.762	0.062	5	2	7219.41	10	2.8	28.3455	Irregular exchange	51.104	0	17.9768	0.000119041	0	12.1255	0	0.354034	0	0	18.4395							F15
No	207.101	6.743	0.067	3	2	7119.92	10	0.7	7.37906	Contaminating mass	75.6054	0	16.4424	0	0	7.70287	0	0	0	0.101693	0.147629							F5
No	207.101	6.766	0.062	3	2	6149.83	10	2.7	27.2483	Irregular exchange	58.9035	0	0	0.0406539	0	27.2793	0	0.597067	7.4911e-06	0.00935392	13.1701							F16
No	207.101	13.019	1.038	1	1	66892.7	10	6.8	68.3236	Contaminating mass	2.2504	0	0	0	0	0	73.3302	0.312982	0	0	24.1065							F7
No	207.101	12.992	0.848	2	1	38933.7	10	6	59.5126	Low pattern fit	7.41512	0	0.259939	0	0	0	81.6511	0.679509	0	0	9.99431							F15
No	207.101	12.847	0.419	2	1	60666.1	10	4.4	43.9785	Contaminating mass	35.3559	0	0.0572446	0	0	0	51.5494	0	0	0	13.0374							F1
No	207.101	13.098	0.933	2	1	56851.9	10	3.4	33.6163	Low pattern fit	52.9252	0	1.24895	0	0	0	30.3894	1.01196	0	0	14.4245							F14
No	207.101	12.916	1.064	1	1	55083.9	10	5.7	57.399	Contaminating mass	7.75352	0	0	0	0	0	87.1072	0.0153595	0	0	5.12396							F5
No	207.101	12.948	0.652	2	1	61036.5	10	6.4	64.4325	Contaminating mass	1.86567	0	0	0	0	0	84.2546	0	0	0	13.8798							F6
No	207.101	13.358	0.078	2	1	35658.5	10	5.1	50.7428	Contaminating mass	20.8047	0	0	0	0	0	71.0919	0.052404	0	0	8.05091							F8
No	207.101	12.983	0.781	2	1	36341.3	10	6.4	63.7824	Irregular exchange	8.55261	0	0.0457823	0.00171848	0	0	68.7698	0.397672	0	0	22.2324							F16
No	207.101	12.887	0.722	1	1	66007.3	10	5.8	58.1013	Irregular exchange	6.17319	0	0.661158	0	0	0	87.7684	0.29751	0	0	5.09975							F13
No	207.124	8.281	0.084	3	1	40168.5	8	3.6	44.7013	Contaminating mass	12.4913	0	0.503239	0	78.4237	8.58172	0	0	0									F8
No	207.124	8.641	0.098	3	1	18706.4	8	2.7	33.6323	Low pattern fit	33.1324	0	0	0.00271927	66.0852	0	0.76401	0	0.015677									F16
No	207.124	8.905	0.062	5	1	100720	8	3.1	38.6995	Contaminating mass	6.21195	0.00679978	44.9247	0.000225374	27.9895	19.4601	0.0375663	0.698007	0.671098									F1
No	207.124	8.662	0.111	3	1	13070.4	8	2.9	35.9834	Irregular exchange	28.68	0	0	0.00362858	70.385	0	0.567439	0	0.364012									F13
No	207.124	8.66	0.109	3	1	22201.2	8	3.1	38.3066	Contaminating mass	31.4784	0	0	0.011915	36.8204	31.0056	0.680895	0	0.00278259									F7
No	207.124	8.643	0.118	3	1	13358.7	8	3.1	38.7756	Contaminating mass	23.0814	0	0	0.00389987	75.6473	0	1.26736	0	0									F6
No	207.124	8.621	0.097	1	1	7671.25	8	4	49.9993	No warnings	0	0	0.000121374	0.00514725	99.9947	0	0	0	0									F15
No	207.124	8.3	0.086	4	1	78333.7	8	3.4	42.481	Contaminating mass	17.4784	0.000103054	0.680856	1.0641e-06	71.517	9.52957	0.791171	0	0.00295673									F5
No	207.124	8.635	0.109	3	1	11979.7	8	3.6	45.1788	Irregular exchange	11.5812	0	0	0.00356981	84.5382	0.000122286	3.87444	0	0.00240243									F14
No	207.147	6.984	0.15	1	1	13705.4	9	0	0.00682587	No warnings	99.9919	0	0	0	0	0	0	0.00575987	0	0.00234597								F15
No	207.147	6.959	0.164	1	1	20334.8	9	0	0.00617701	No warnings	99.9921	0	0	0	0	0	0	0.00794186	0	0								F8
No	207.147	6.946	0.102	1	1	13249.7	9	0	0	No warnings	100	0	0	0	0	0	0	0	0	0								F13
No	207.147	7.01	0.117	1	1	26336.6	9	0	0.0054325	No warnings	99.993	0	0	0	0	0	0	0.00698465	0	0								F7
No	207.147	6.9	0.152	1	1	13021.5	9	0	0.00101216	No warnings	99.9987	0	0	0	0	0	0	0.00130135	0	0								F16
No	207.147	6.907	0.12	1	1	13584.8	9	0	0	No warnings	100	0	0	0	0	0	0	0	0	0								F1
No	207.147	6.954	0.128	1	1	11380.4	9	0	0.456651	No warnings	99.4129	0	0	0	0	0	0	0.587123	0	0								F14
No	207.147	6.942	0.1	1	1	17133.8	9	0	0.00284048	No warnings	99.9963	0	0	0	0	0	0	0.00365205	0	0								F5
No	207.147	6.95	0.129	1	1	10642.5	9	0	0.0137954	No warnings	99.9823	0	0	0	0	0	0	0.0177369	0	0								F6
No	207.148	7.83	0.112	4	1	6819	10	1.2	11.8285	Irregular exchange	73.2244	5.66051	12.3158	0	0	0	0	0	0	3.38308e-05	8.79931							F15
No	207.148	7.791	0.09	4	1	3673.31	10	0.8	7.62193	Irregular exchange	75.2202	5.4586	15.2822	0	0	0	0	0.0646695	0	0	3.97436							F13
No	207.148	7.807	0.117	2	1	3481.86	10	0	0.463626	No warnings	97.3874	2.38776	0	0	0	0	0	0	0	0	0.22485							F14
No	207.148	7.789	0.077	1	1	2417.35	10	0	0.307633	No warnings	99.6924	0	0	0	0	0	0	0	0	0	0.307633							F7
No	207.148	7.851	0.109	2	1	3390.13	10	0.8	8.3818	Contaminating mass	91.6182	0	0	0	0	0	0	0	0	0	8.3818							F1
No	207.148	7.801	0.068	1	1	2609.42	10	0.1	0.645516	No warnings	99.2908	0	0	0	0	0	0	0.212383	0	0	0.496848							F8
No	207.148	7.797	0.098	1	1	1885.61	10	0	0.392144	No warnings	99.6079	0	0	0	0	0	0	0	0	0	0.392144							F6
No	207.148	7.762	0.036	1	1	2096.37	10	1.1	11.1905	Contaminating mass	33.1474	61.8467	0	0	0	0	0	0	0	0	5.00588							F5
No	207.148	7.834	0.125	2	1	4120.51	10	2	19.6257	Irregular exchange	80.3598	0	0	0	0	0	0	0.0481015	0	0	19.5921							F16
No	207.162	10.613	0.074	2	1	5223.72	13	4.3	33.3433	Irregular exchange	45.8168	0	0	0	0	0	0.000272927	0.00303242	54.1799	0	0	0	0	0				F14
No	207.162	10.593	0.072	2	1	5188.03	13	4.5	34.8618	Contaminating mass	43.349	0	0	0	0	0	0.000285357	0.00317053	56.6475	0	0	0	0	0				F7
No	207.162	10.562	0.07	2	1	4152.28	13	3.9	29.9705	Irregular exchange	51.2976	0	0	0	0	0	0.00024532	0.00272569	48.6995	0	0	0	0	0				F15
No	207.162	10.574	0.071	2	1	3117.81	13	2.7	20.5508	Contaminating mass	66.6047	0	0	0	0	0	0.000168216	0.00186901	33.3933	0	0	0	0	0				F5
No	207.162	10.549	0.064	2	1	2573.98	13	2.5	19.2931	Contaminating mass	68.6484	0	0	0	0	0	0.000157921	0.00175463	31.3497	0	0	0	0	0				F6
No	207.162	10.58	0.077	3	1	4064.59	13	2.8	21.1834	Contaminating mass	57.7704	0	0	12.4901	0	0	0.000149801	0.00166441	29.7377	0	0	0	0	0				F1
No	207.162	10.576	0.062	2	1	2962.56	13	3.1	23.8502	Irregular exchange	61.2431	0	0	0	0	0	0.000195223	0.00216907	38.7545	0	0	0	0	0				F16
No	207.162	10.608	0.069	2	1	3596.68	13	3	23.343	Irregular exchange	62.0672	0	0	0	0	0	0.000191072	0.00212295	37.9305	0	0	0	0	0				F13
No	207.162	10.619	0.074	2	1	3106.42	13	2.3	18.0597	Contaminating mass	70.6527	0	0	0	0	0	0.000147826	0.00164245	29.3455	0	0	0	0	0				F8
No	207.162	7.876	0.057	2	1	1576.27	13	0	0	No warnings	100	0	0	0	0	0	0	0	0	0	0	0	0	0				F13
No	207.162	8.016	0.074	2	1	10317.1	13	3.5	27.2334	Contaminating mass	55.6714	0	0	0.118456	0	0	0.000222692	0.00247427	44.2075	0	0	0	0	0				F6
No	207.162	8.074	0.075	3	1	11784.9	13	4	30.5266	Irregular exchange	49.8275	0	0	0.906158	0	0	0.00024816	0.00275725	49.2634	0	0	0	0	0				F14
No	207.162	8.006	0.078	3	1	15393.5	13	3.3	25.3497	Contaminating mass	56.3578	0	0	3.91771	0	0	0.000200097	0.00222322	39.722	0	0	0	0	0				F1
No	207.162	7.989	0.062	2	1	7773.39	13	2.8	21.6712	Low pattern fit	64.7225	0	0	0.0983303	0	0	0.000177201	0.00196884	35.177	0	0	0	0	0				F16
No	207.162	7.882	0.068	1	1	1721.21	13	0	0	No warnings	100	0	0	0	0	0	0	0	0	0	0	0	0	0				F5
No	207.162	8.031	0.106	2	1	8230.88	13	3.1	23.5118	Low pattern fit	61.6293	0	0	0.261811	0	0	0.000191959	0.00213281	38.1066	0	0	0	0	0				F15
No	207.162	8.006	0.077	2	1	11275.6	13	2.6	19.8404	Contaminating mass	67.6879	0	0	0.114046	0	0	0.000162185	0.001802	32.1961	0	0	0	0	0				F7
No	207.162	7.88	0.06	2	1	2319.09	13	0	0	No warnings	100	0	0	0	0	0	0	0	0	0	0	0	0	0				F8
No	207.163	5.351	0.058	2	1	20098.3	13	0.7	5.53333	Contaminating mass	91.0083	0	0	0	0	0	4.52924e-05	0.000503232	8.99119	0	0	0	0	0				F8
No	207.163	5.372	0.091	3	1	6436.34	13	0.2	1.3906	Contaminating mass	97.7402	0	0	0	0	0	1.13826e-05	0.000126469	2.25961	0	0	0	0	0				F1
No	207.163	5.367	0.079	2	1	23283.4	13	0	0.344775	No warnings	99.4397	0	0	0	0	0	2.82211e-06	3.13558e-05	0.56023	0	0	0	0	0				F13
No	207.163	5.368	0.061	2	1	25885.2	13	0.6	4.33514	Irregular exchange	92.9553	0	0	0	0	0	3.54847e-05	0.000394262	7.04423	0	0	0	0	0				F14
No	207.163	5.369	0.067	3	1	16854	13	0.9	6.99993	Contaminating mass	84.6946	0	0	7.73834e-05	0.00354069	10.4766	0	0	4.82519	0	0	0	0	0				F5
No	207.163	5.35	0.086	2	1	19121.4	13	0.1	0.629067	No warnings	98.9778	0	0	0	0	0	5.14915e-06	5.72109e-05	1.02218	0	0	0	0	0				F6
No	207.163	5.393	0.06	2	1	17493.3	13	0.5	4.02681	Contaminating mass	93.4564	0	0	0	0	0	3.2961e-05	0.000366221	6.54323	0	0	0	0	0				F7
No	207.163	5.36	0.093	2	1	19149.7	13	0	0	No warnings	100	0	0	0	0	0	0	0	0	0	0	0	0	0				F16
No	207.163	5.325	0.075	2	1	20095.8	13	0.1	1.11158	No warnings	98.1937	0	0	0	0	0	9.09871e-06	0.000101094	1.80623	0	0	0	0	0				F15
No	207.921	2.197	0.072	1	2	179095	8	0	0.18305	Low pattern fit	99.7149	0	0	0	0.201881	0	0	0.00925381	0.074012									F15
No	207.921	2.156	0.133	1	2	282023	8	0	0.11378	Low pattern fit	99.8086	0	0	0	0.154134	0	0	0.00405269	0.0331672									F13
No	207.921	2.161	0.09	1	2	345062	8	0	0.0272636	Low pattern fit	99.9634	0	0	0	0.0181434	0	0	0.00199846	0.0164432									F6
No	207.921	2.143	0.083	1	2	274626	8	0	0.0193777	Low pattern fit	99.9662	0	0	0	0.0287024	0	0	0.000326831	0.00474056									F5
No	207.921	2.169	0.097	1	2	395380	8	0	0.0220969	Low pattern fit	99.9707	0	0	0	0.0135531	0.000518541	0	0.001689	0.0135184									F8
No	207.921	2.197	0.076	1	2	215552	8	0	0.0611185	Low pattern fit	99.908	0	0	0	0.0610151	0	0	0.00333582	0.0276921									F14
No	207.921	2.199	0.077	1	2	193964	8	0	0.171533	Low pattern fit	99.7347	0	0	0	0.18531	0	0	0.00888966	0.0710995									F16
No	207.921	2.132	0.083	1	2	325441	8	0	0.0211943	Low pattern fit	99.9638	0	0	0	0.0300036	0	0	0	0.00619248									F1
No	207.921	2.158	0.066	1	2	283150	8	0	0.0328544	Low pattern fit	99.9426	0	0	0	0.0488202	0	0	0.000951682	0.00761155									F7
No	208.038	6.164	0.07	3	1	4031.07	5	1.6	31.1091	Contaminating mass	52.8373	0	0	40.1339	0	7.02878												F1
No	208.038	6.132	0.041	3	1	1675.47	5	0.6	12.987	Contaminating mass	82.9007	0	0	10.2807	0	6.8186												F7
No	208.038	6.127	0.044	3	1	1534.45	5	0.3	6.95808	Irregular exchange	93.0419	0	0	0	6.67082e-05	6.95803												F16
No	208.038	6.124	0.054	3	1	1585.1	5	0.9	17.9231	Contaminating mass	73.6498	0	0	21.068	0	5.28228												F8
No	208.038	6.129	0.045	2	1	1112.1	5	0.6	11.9019	Contaminating mass	80.1635	0	0	19.8365	0	0												F5
No	208.038	6.131	0.038	4	1	1663.39	5	0.8	15.0728	Irregular exchange	80.3425	0	0	11.4617	0	8.1958												F14
No	208.038	6.123	0.05	3	1	1714.95	5	1.1	22.3199	Irregular exchange	69.5093	0	0	20.427	0	10.0636												F15
No	208.038	6.13	0.052	3	1	1638.8	5	1	19.0419	Contaminating mass	74.6394	0	0	15.7968	0	9.56385												F6
No	208.038	6.13	0.036	4	1	1487.31	5	1.1	22.492	Irregular exchange	66.6588	0	0	27.123	0	6.21816												F13
No	208.049	2.382	0.092	2	2	78058.2	9	0.2	2.30975	Contaminating mass	97.3831	0	0	0	6.87018e-05	0.000461468	0.101298	0	2.45849	0.0566048								F1
No	208.049	2.325	0.093	2	2	60156.6	9	0.2	2.71731	Contaminating mass	96.943	0	0	0	0	0	2.19657e-05	0	3.05696	0								F6
No	208.049	2.31	0.092	3	2	84834.5	9	0.7	7.87719	Irregular exchange	89.8931	0.0853501	0	0	3.12736e-05	2.8351	0.457422	0	6.67165	0.0573367								F16
No	208.049	2.302	0.102	4	2	130141	9	0.6	6.52711	Contaminating mass	91.3682	0	0	6.06159e-05	7.92477e-06	3.28571	0.267639	0	4.9963	0.0821141								F7
No	208.049	2.327	0.08	2	2	117263	9	0.5	5.25265	Contaminating mass	94.0501	0	0	0	8.70296e-05	0.000590304	0.26532	0	5.47616	0.20771								F5
No	208.049	2.336	0.086	3	2	77561.2	9	0.7	7.55829	Irregular exchange	90.3685	0	0	0	0.0001285	1.72062	1.99082	0	5.80292	0.116968								F13
No	208.049	2.309	0.092	4	2	77042.8	9	0.6	6.85563	Low pattern fit	91.4314	0	0	0.197551	0	0	2.93917	0	5.41361	0.0182363								F15
No	208.049	2.311	0.097	3	2	75670.5	9	0.5	5.92603	Contaminating mass	92.9643	0	0	0	7.76553e-05	0.000223699	1.47556	0	5.55946	0.00042715								F8
No	208.049	2.336	0.092	3	2	73345.4	9	0.2	2.64004	No warnings	96.7885	0	0	0	3.24222e-05	0	1.03164	0	2.04807	0.131758								F14
No	208.071	7.507	0.051	1	1	3126.77	7	0	0	No warnings	100	0	0	0	0	0	0	0										F6
No	208.071	7.511	0.06	2	1	2781.08	7	0.3	4.9499	Contaminating mass	95.0501	0	0	0	0	1.00459e-05	2.92354e-05	4.94987										F1
No	208.071	7.505	0.06	2	1	4505.95	7	0	0	No warnings	100	0	0	0	0	0	0	0										F14
No	208.071	7.523	0.062	4	1	6797.32	7	0.5	7.57434	Irregular exchange	87.8207	0	0	0	10.745	0	0	1.43435										F13
No	208.071	7.514	0.06	1	1	7310.95	7	0	0	No warnings	100	0	0	0	0	0	0	0										F8
No	208.071	7.513	0.055	2	1	4621.52	7	0	0	No warnings	100	0	0	0	0	0	0	0										F7
No	208.071	7.505	0.06	1	1	3632.73	7	0	0	No warnings	100	0	0	0	0	0	0	0										F16
No	208.071	7.546	0.065	5	1	7718.9	7	0.6	8.73379	Contaminating mass	86.9685	0	0	1.24163	8.37241	0	0	3.41743										F5
No	208.073	7.448	0.055	4	2	8965.69	11	2.9	26.3417	Irregular exchange	60.344	0	6.78112	3.3354	0	0	0.000212808	0	19.5811	2.76185e-06	4.15741e-06	9.95819						F16
No	208.073	7.551	0.08	3	2	16639.4	11	1.6	14.3656	Contaminating mass	71.829	0	0	13.679	0	0	0.000153701	0	14.1425	0	0	0.349412						F7
No	208.073	7.479	0.016	4	2	9175.15	11	2.9	26.4158	Irregular exchange	56.076	0	5.33392	4.81294	0	14.9134	0	0	0	8.30092	9.11006e-06	10.5628						F15
No	208.073	7.572	0.077	4	2	12495	11	0.8	7.70466	Contaminating mass	84.8781	0.000276723	2.07214	7.19666	0	0	0.58618	0	0	1.21673	3.451e-06	4.04991						F6
No	208.073	7.56	0.079	5	2	12664.1	11	1.5	14.0686	Contaminating mass	71.9185	0	4.05608	8.95154	0	0	0.963455	0	13.4079	0.443882	0.0967827	0.161851						F8
No	208.073	7.5	0.024	4	2	9277.55	11	3.7	33.6279	Irregular exchange	40.8718	0	10.543	6.26126	0	13.7308	0	0	12.7514	7.42934	0.0294187	8.38299						F14
No	208.073	7.387	0.08	3	2	5779.78	11	2.8	25.6217	Contaminating mass	43.4954	10.5993	19.2521	6.15042	4.59181e-05	0	1.58179	2.3028e-06	0	1.66864	1.51678e-05	17.2523						F1
No	208.073	7.265	0.061	4	2	37789.5	11	6	54.3658	Contaminating mass	19.0904	0.000148927	0	10.0926	0	2.75893	0	3.54108e-05	62.1608	4.10157	1.50352e-06	1.79551						F5
No	208.073	7.664	0.035	3	2	11580.3	11	2.9	26.7192	Irregular exchange	55.3476	0	5.19495	0.000990045	3.53434e-05	23.4622	1.21751	9.68965e-06	0	1.80422	0.0328118	12.9396						F13
No	208.083	5.787	0.059	4	1	18353.3	6	0.2	3.5234	Contaminating mass	91.2678	0	6.94046	0	1.69916	0.0925637	0											F1
No	208.083	5.767	0.061	4	1	21989.5	6	0.5	9.12549	Contaminating mass	82.8885	0	7.13735	0	9.39236	0.581761	0											F7
No	208.083	5.774	0.055	3	1	7028.35	6	0.5	7.68379	Irregular exchange	78.4012	0	20.3241	0	0.919024	0.355679	0											F15
No	208.083	5.778	0.059	4	1	23644.1	6	0.3	5.41686	Irregular exchange	86.4957	0	10.83	0	2.53055	0.143795	0											F13
No	208.083	5.771	0.057	4	1	30132.2	6	0.5	9.07763	Irregular exchange	78.6423	0	15.5435	0	5.69199	0.122161	0											F16
No	208.083	5.775	0.056	4	1	14025.5	6	0.3	5.13107	Irregular exchange	87.3754	0	9.95284	0	2.47782	0.193889	0											F14
No	208.083	5.776	0.058	4	1	26698.7	6	0.3	4.71931	Contaminating mass	87.915	0	10.1921	0	1.53274	0.360141	0											F8
No	208.083	5.775	0.059	4	1	16526.8	6	0.7	11.3564	Contaminating mass	76.8657	0	12.214	0	10.8917	0.0286767	0											F6
No	208.083	5.77	0.062	4	1	21723.7	6	0.4	7.4324	Contaminating mass	83.2437	0	11.3263	0	5.20793	0.222003	0											F5
No	208.085	7.479	0.071	2	1	14114.8	10	1.1	11.0346	Contaminating mass	86.2068	0	0	0	0	0	5.42732e-05	0	13.7932	0	0							F8
No	208.085	7.464	0.062	2	1	8208.47	10	2	19.7877	Contaminating mass	75.2654	0	0	0	0	0	9.7325e-05	0	24.7345	0	0							F1
No	208.085	7.474	0.074	2	1	11296.8	10	1.4	13.7363	Contaminating mass	82.8296	0	0	0	0	0	6.75617e-05	0	17.1704	0	0							F5
No	208.085	7.473	0.068	3	1	10262.3	10	2.1	20.678	Irregular exchange	73.4325	0	0	0	3.81052e-05	0	2.87989	0	23.6876	0	0							F15
No	208.085	7.493	0.072	2	1	15028.9	10	1.2	12.1462	Contaminating mass	84.8172	0	0	0	0	0	5.97407e-05	0	15.1827	0	0							F7
No	208.085	7.466	0.064	3	1	10066.4	10	2.3	23.4464	Irregular exchange	70.692	0	0	0	0	0	3.00826e-05	0	29.308	0	0							F16
No	208.085	7.475	0.058	3	1	10800.6	10	2.2	21.8418	Irregular exchange	72.2351	0	0	0	2.42037e-05	0	1.85045	0	25.9144	0	0							F14
No	208.085	7.477	0.067	3	1	7628.14	10	0.3	2.78108	No warnings	95.9356	0	0	0	4.00815e-05	0	2.92282	0	0	1.14152	0							F13
No	208.085	7.474	0.071	2	1	10486.2	10	2	20.4866	Contaminating mass	74.3917	0	0	0	0	0	0.000100763	0	25.6082	0	0							F6
No	208.085	2.387	0.077	2	1	62653	10	0	0.139872	No warnings	99.5338	0	0	0.46624	0	0	0	0	0	0	0							F14
No	208.085	2.403	0.076	4	1	46683.1	10	1.7	16.687	Irregular exchange	80.9991	0	0	0.482816	0	0	0.413992	0	0	18.1041	0							F16
No	208.085	2.409	0.069	4	1	65290.8	10	0.7	7.10581	Irregular exchange	91.9333	0	0	0.00572796	0	0	0.502628	0	0	7.55835	0							F13
No	208.085	2.379	0.08	3	1	75866.7	10	0	0.0760311	No warnings	99.7466	0	0	0.253437	0	0	0	0	0	0	0							F7
No	208.085	2.369	0.077	3	1	61253.7	10	0.1	0.926326	No warnings	97.2153	0	0	2.63321	0	0	0	2.27809e-07	0	0.151514	0							F5
No	208.085	2.463	0.083	3	1	24687.1	10	0	0.204507	No warnings	99.3183	0	0	0.68169	0	0	0	0	0	0	0							F1
No	208.085	2.369	0.078	5	1	44395.2	10	0.7	7.21044	Irregular exchange	91.7166	0	0	0.278637	0	0	0.258217	0	0	7.74658	0							F15
No	208.085	2.44	0.083	3	1	50857.7	10	0.8	8.00896	Contaminating mass	90.0411	0	0	0.0194475	0	0	4.19417e-06	3.53866e-05	9.42418	0.515276	0							F8
No	208.085	2.425	0.081	5	1	60809.2	10	0.1	1.39965	Contaminating mass	98.0662	0	0	0.320184	0	0	6.74229e-07	5.75807e-06	1.48661	0.127	0							F6
No	208.085	5.531	0.111	2	1	4883.48	10	0.3	2.88812	No warnings	96.791	0	0	0	0	0	0	4.82493e-06	0	3.20902	0							F14
No	208.085	5.575	0.083	1	1	8718.05	10	0	0	Low pattern fit	100	0	0	0	0	0	0	0	0	0	0							F6
No	208.085	5.61	0.222	1	1	7268.23	10	0	0	No warnings	100	0	0	0	0	0	0	0	0	0	0							F7
No	208.085	5.758	0.155	2	1	2496.11	10	5	50.1678	No warnings	0	0.0109916	0	0	0.000753081	98.2656	1.72264	0	0	0	0							F16
No	208.085	5.547	0.133	1	1	4705.24	10	0	0	No warnings	100	0	0	0	0	0	0	0	0	0	0							F5
No	208.085	5.583	0.139	2	1	7831.57	10	1.5	15.1228	Irregular exchange	71.3219	0	0	0.000508378	4.60576e-05	23.8313	3.35861	0	1.47024	0.0173352	0							F15
No	208.085	5.558	0.167	3	1	4885.82	10	0.2	1.75733	No warnings	97.7577	0	0	0	1.19201e-05	0	0.869235	0	0	1.37309	0							F13
No	208.085	5.657	0.075	1	1	5811.93	10	0	0.390795	No warnings	99.5658	0	0	0	0	0	0	0	0	0.434217	0							F1
No	208.089	14.156	0.071	2	1	17162.8	7	5.4	76.6012	Contaminating mass	7.73299	0.0831033	0	5.61221	0.070918	0	86.5008	0										F1
No	208.089	14.128	0.063	2	1	12542.7	7	5.4	77.5213	Irregular exchange	9.50953	0	0	0	0.146827	0	90.3436	0										F16
No	208.089	14.142	0.064	2	1	9314.95	7	5.2	73.8927	Contaminating mass	13.7761	0	0	0	0.0469655	0	86.1769	0										F7
No	208.089	14.077	0.05	4	1	7674.85	7	4.5	64.5077	Irregular exchange	16.0717	0	0	0	26.0081	0	57.9203	0										F15
No	208.089	14.118	0.097	2	1	10830.4	7	5.4	76.6505	Contaminating mass	10.5551	0	0	0	0.0579659	0	89.3869	0										F5
No	208.089	14.154	0.065	1	1	6109.65	7	6	85.6592	Contaminating mass	0	0.052083	0	0	0.0624695	0	99.8854	0										F6
No	208.089	14.147	0.069	3	1	10211.8	7	5.2	74.6703	Irregular exchange	11.9145	0	0	0	2.91048	0	85.175	0										F13
No	208.089	14.136	0.06	2	1	13281.2	7	5.4	77.1538	Contaminating mass	9.98389	0	0	0	0.0100474	0	90.0061	0										F8
No	208.089	14.113	0.066	2	1	11643.7	7	5.2	74.5294	Irregular exchange	12.9915	0	0	0	0.172862	0	86.8357	0										F14
No	208.089	11.295	0.08	2	1	2518.62	15	1	6.34785	Contaminating mass	91.3438	0	0	0	0	0	0	0	0	4.38192e-05	4.04162e-06	8.65612	0	0	0	0		F5
No	208.089	11.269	0.041	4	1	2405.9	15	6.1	40.4941	Contaminating mass	34.3865	0	0	0.0143072	15.9839	0	0	7.52801e-06	0.000125769	1.17048	0	48.4432	0	0	0	0.00150874		F8
No	208.089	11.231	0.185	4	1	2409.97	15	5.3	35.039	Irregular exchange	8.42683	0	0	0.0613143	68.5	0	0	5.36204e-06	9.82875e-05	0.86459	0	22.1471	0	0	0	0		F15
No	208.089	11.23	0.287	3	1	2948.82	15	4.4	29.2038	Irregular exchange	9.02323	0	0	0.071878	80.3018	0	0	0	0	5.36748e-05	4.95064e-06	10.603	0	0	0	0		F13
No	208.089	11.217	0.172	2	1	1626.2	15	5	33.0216	Irregular exchange	0	0	0.000839656	0.0608917	86.3134	0	0	0	0	6.89568e-05	6.36016e-06	13.6218	0	0	0	0.00300063		F14
No	208.095	5.725	0.06	4	4	96965	8	0.1	1.65518	No warnings	94.9628	0	4.22042	0	0	0.577886	1.59517e-05	1.696e-05	0.238869									F15
No	208.095	5.738	0.06	4	4	115628	8	0.3	3.31075	No warnings	93.4199	0	3.78961	0	0.0618925	0.39588	2.33427e-05	1.98192	0.350783									F14
No	208.095	5.735	0.06	4	4	93135.5	8	0.2	2.64605	No warnings	95.0749	0	2.5872	0	0	0.185737	0	2.15219	0									F13
No	208.095	5.737	0.061	3	4	119527	8	0.2	2.80746	Contaminating mass	91.9723	0	6.54915	0	0	0.494268	0	0.984292	0									F8
No	208.095	5.753	0.065	3	4	58899.7	8	0.2	2.18353	Contaminating mass	95.963	0	1.52808	0	0	1.5751	0	0.933799	0									F1
No	208.095	5.737	0.056	4	4	184342	8	0.2	2.74794	Contaminating mass	92.5775	0	5.71783	0	0.00298374	0.687869	0	1.0138	0									F7
No	208.095	5.746	0.063	4	4	127793	8	0.1	1.85553	Contaminating mass	95.8082	0	2.53116	0	0.289147	0.48745	0	0.884011	0									F5
No	208.095	5.725	0.057	3	4	112867	8	0.2	2.26793	Irregular exchange	93.6999	0	4.89382	0	0	0.744249	0	0.662078	0									F16
No	208.095	5.74	0.062	3	4	111565	8	0.2	2.43664	Contaminating mass	92.9314	0	5.61878	0	0.0165951	0.92169	0	0.511535	0									F6
No	208.099	13.289	0.027	2	1	2029.24	14	11.6	83.1555	Irregular exchange	16.4863	0.385768	0	0	0	0	0	0	0	0	0	0	0	5.23964e-05	83.1279			F14
No	208.099	13.29	0.027	2	1	2370.66	14	8.5	60.6906	Contaminating mass	39.3094	0	0	0	0	0	0	0	0	0	0	0	0	3.82539e-05	60.6906			F8
No	208.099	13.353	0.055	2	1	1703.35	14	10.1	71.8826	Contaminating mass	28.1174	0	0	0	0	0	0	0	0	0	0	0	0	4.53083e-05	71.8826			F5
No	208.099	13.338	0.042	2	1	1387.51	14	7.3	51.8616	Irregular exchange	43.9529	0.453166	0	0	0	0	0	0	0.00105675	10.5399	0	0	0	2.83973e-05	45.053			F16
No	208.11	3.675	0.015	2	2	2736.34	6	0.5	8.45307	Irregular exchange	88.1999	0.764957	0	2.61101	0	8.42409	0											F13
No	208.11	3.952	0.035	1	2	12530.9	6	0.3	4.71358	Contaminating mass	91.6368	0	0	6.76737	0	1.59587	0											F5
No	208.11	3.701	0.095	2	2	2426.36	6	0.5	8.17583	Low pattern fit	87.8748	0	0	5.78554	0	6.33967	0											F15
No	208.11	4.054	0.055	1	2	7430.97	6	0.2	2.89202	Contaminating mass	94.8331	0	0	4.24111	0	0.925756	0											F7
No	208.11	3.719	0.023	1	2	4372.41	6	0.3	5.71881	Irregular exchange	92.8514	0	0	1.01285	5.72864e-07	5.5402	0.595553											F14
No	208.11	4.061	0.095	1	2	3234	6	3.4	56.6526	Contaminating mass	32.0169	0	0	0	0	67.9831	0											F6
No	208.11	3.945	0.039	2	2	8946.82	6	0.3	4.30246	Contaminating mass	94.4862	0	0	0.877208	0	4.63663	0											F8
No	208.11	3.69	0.026	1	2	1092.4	6	0.9	14.3509	Irregular exchange	81.6934	0	0	2.71359	0	15.593	0											F16
No	208.111	2.829	0.082	2	1	8257.8	12	8.2	68.557	Contaminating mass	25.2105	0	0	0	0	0	0	0	0	1.75295e-05	0	74.7894	0					F8
No	208.111	2.784	0.113	3	1	33442.3	12	3.2	26.2628	Contaminating mass	70.6261	0	0	0	4.91837e-05	0	1.59183	0	0	1.42429e-05	0	27.782	0					F7
No	208.111	2.818	0.084	3	1	42271	12	6.4	53.4001	Irregular exchange	26.5815	0	0	0	0	0	0.000745261	0	55.5996	1.92489e-05	0	17.8182	0					F13
No	208.111	2.665	0.157	2	1	11625.9	12	3.6	30.2067	Irregular exchange	67.0472	0	0	0	0	0	0	0	0	0	0	32.9528	0					F15
No	208.111	2.752	0.087	2	1	35605.8	12	4.6	38.5642	Contaminating mass	50.4926	0	0	0	0	0	0.000365528	0	27.27	6.14096e-06	0	22.2371	0					F5
No	208.111	3.056	0.108	3	1	8252.44	12	8.5	70.5238	Contaminating mass	20.6851	0	0	0	0	0	0.000116962	0	8.72588	0	0	70.5889	0					F1
No	208.111	2.792	0.102	2	1	11170.8	12	5.8	48.3913	Contaminating mass	47.2095	0	0	0	0	0	0	0	0	6.1528e-05	0	52.7905	0					F6
No	208.111	2.72	0.097	3	1	30338.1	12	4.4	36.8569	Irregular exchange	52.1501	0	0	0	0	0	0.0003756	0	28.0213	1.23034e-05	0	19.8281	0					F14
No	208.111	2.691	0.102	3	1	34822	12	5	41.2864	Irregular exchange	46.5695	0.118306	0	0	0	0	0.000407099	0	30.3713	0	0	22.9406	0					F16
No	208.131	6.535	0.064	4	3	239105	9	0.7	7.61108	Contaminating mass	69.8806	0	28.7747	0	0	3.96178e-06	0	0.575882	0	0.768788								F7
No	208.131	6.542	0.072	4	3	232715	9	0.4	3.9039	No warnings	94.9894	0	0	1.46954	0	1.78733e-06	0.21079	0.255258	0	3.07499								F16
No	208.131	6.536	0.066	5	3	129316	9	0.8	9.19827	Contaminating mass	62.3762	0	35.5461	0.7688	0	5.31381e-06	0.287996	0.765057	0	0.255817								F1
No	208.131	6.538	0.066	3	3	405170	9	1.2	12.9908	Irregular exchange	45.0815	1.35157e-05	53.6252	0.268252	0	9.03642e-07	0.0305898	0.135778	0	0.858681								F14
No	208.131	6.541	0.076	3	3	151097	9	0.2	2.70899	Contaminating mass	95.2101	0.102865	0	2.59872	0	8.14426e-06	0	1.15641	0	0.931886								F5
No	208.131	6.536	0.069	3	3	182067	9	0.1	1.36349	Contaminating mass	98.5133	0	0	0	3.80016e-07	3.62217e-06	0.0277118	0.51272	0	0.946235								F8
No	208.131	6.54	0.058	4	3	212045	9	0.9	9.70246	Irregular exchange	72.9488	0	22.2413	0	0	1.41791e-06	0	0.222498	0.00478534	4.58263								F15
No	208.131	6.545	0.072	4	3	166200	9	0.3	3.26768	Contaminating mass	95.2787	0	0	1.90235	0	4.02251e-06	0.16189	0.591543	0	2.06554								F6
No	208.131	6.541	0.068	3	3	191960	9	0.2	2.38897	No warnings	97.4186	0	0	0	4.66872e-06	2.41913e-06	0.340456	0.355327	0	1.88563								F13
No	208.131	6.29	0.034	5	4	58627.9	9	0.4	4.75022	Irregular exchange	83.3352	0	13.877	1.35543	0	3.97313e-06	0.284158	0.553857	0	0.594417								F14
No	208.131	6.305	0.075	3	3	43121.8	9	0.1	1.54074	Contaminating mass	98.019	0	0	0	0	1.42083e-05	0	1.98094	0	0								F8
No	208.131	6.281	0.099	5	3	43902.4	9	1.1	12.1672	Irregular exchange	55.4005	0	30.0433	12.6837	0	8.73045e-07	1.76162	0.100419	0	0.0104437								F15
No	208.131	6.274	0.046	4	4	68055.5	9	0.7	8.0985	Contaminating mass	68.639	0	25.7656	4.45685	0	8.1087e-06	0	1.13085	0	0.00763022								F6
No	208.131	6.321	0.037	4	4	130012	9	1.2	13.3093	Contaminating mass	44.6359	0	49.148	5.47192	0	0.0726093	0	0.667666	0	0.00392112								F7
No	208.131	6.267	0.072	6	4	61117.2	9	0.8	8.94573	Contaminating mass	67.7954	0	25.2012	4.52243	0	0.248162	0.331015	1.90079	0	0.00105168								F1
No	208.131	6.316	0.082	4	4	277437	9	1.6	17.5795	Irregular exchange	21.4575	0	78.2889	0	0	7.70124e-07	0.143226	0.107356	0	0.00298372								F13
No	208.131	6.314	0.076	5	4	62250.9	9	0.7	7.60109	Irregular exchange	74.7766	0	13.7585	9.47597	0	3.6194e-06	1.47546	0.504546	0	0.00892294								F16
No	208.131	6.319	0.036	5	4	135133	9	1.2	13.4433	Contaminating mass	41.0744	0	58.2751	0	0	3.61092e-06	0.136035	0.503364	0	0.0110795								F5
No	208.146	11.911	0.161	3	1	647363	13	0	0.308731	No warnings	99.5986	0	0	0	0	0	0	0	2.02343e-06	0	0.401349	0	0	0				F6
No	208.146	11.926	0.16	4	1	699289	13	0.1	0.483058	No warnings	98.1662	0	0	1.71363	0	0	4.53024e-07	0	0.0313946	0	0.0887005	0	0	5.34416e-05				F15
No	208.146	11.924	0.171	4	1	676691	13	0.1	0.507807	No warnings	98.5911	0	0	1.05674	0	0	6.46705e-07	0	0.0451186	0	0.307031	0	0	0				F16
No	208.146	11.923	0.152	3	1	613123	13	0	0.134712	No warnings	99.8249	0	0	0	0	0	0	0	8.82446e-07	0	0.175034	0	0	6.94284e-05				F1
No	208.146	11.925	0.166	5	1	660822	13	0.1	0.728773	No warnings	98.4749	0	0	0.785795	0.0359289	0	0	0	0.0334653	0	0.664283	0.0056734	0	0				F13
No	208.146	11.911	0.181	3	1	705634	13	0.1	0.413788	No warnings	99.1991	0.284372	0	0	0	0	4.98654e-07	0	0.0351987	0	0.481261	0	0	5.09407e-05				F7
No	208.146	11.929	0.159	3	1	595829	13	0.1	0.476833	No warnings	99.2586	0.114594	0	0	0.0199719	0	0	0	0.0317998	0	0.574995	0	0	0				F5
No	208.146	11.936	0.175	3	1	678273	13	0.1	0.740238	No warnings	99.0296	0	0	6.8345e-06	0.0158119	0	0	0	6.01596e-09	1.06886e-06	0.940476	0.0140337	0	5.2599e-05				F8
No	208.146	11.923	0.161	4	1	691468	13	0.1	0.810211	No warnings	97.0607	0.887543	0	1.53952	0	0	6.86877e-07	0	0.0480224	0	0.464102	0	0	0.000110515				F14
No	208.182	15.116	0.089	3	1	20510.3	14	0.1	0.527747	No warnings	97.5372	0	0	2.46282	0	0	0	0	0	0	0	0	0	0	0			F16
No	208.182	15.118	0.093	3	1	20169.1	14	0.2	1.42487	Irregular exchange	93.3506	0	0	6.6494	0	0	0	0	0	0	0	0	0	0	0			F14
No	208.182	15.097	0.085	3	1	19140.5	14	0.1	0.640143	No warnings	97.0127	0	0	2.98733	0	0	0	0	0	0	0	0	0	0	0			F15
No	208.182	15.127	0.098	3	1	20178.8	14	0.2	1.12626	Contaminating mass	94.7441	0	0	5.2559	0	0	0	0	0	0	0	0	0	0	0			F8
No	208.182	15.101	0.094	3	1	20304.9	14	0.1	1.03943	Irregular exchange	95.1493	0	0	4.85065	0	0	0	0	0	0	0	0	0	0	0			F13
No	208.182	15.096	0.095	3	1	19766.4	14	0.2	1.57022	Contaminating mass	92.6723	0	0	7.32769	0	0	0	0	0	0	0	0	0	0	0			F6
No	208.182	15.122	0.094	3	1	21503.7	14	0.3	1.96165	Contaminating mass	90.8456	0	0	9.15438	0	0	0	0	0	0	0	0	0	0	0			F5
No	208.182	15.099	0.085	3	1	17858.4	14	0.1	0.852855	Contaminating mass	96.02	0	0	3.97999	0	0	0	0	0	0	0	0	0	0	0			F1
No	208.182	15.117	0.09	3	1	19766.9	14	0.2	1.61091	Contaminating mass	92.4824	0	0	7.51758	0	0	0	0	0	0	0	0	0	0	0			F7
No	208.194	8.193	0.141	1	1	5384.48	13	0	0	No warnings	100	0	0	0	0	0	0	0	0	0	0	0	0	0				F13
No	208.194	8.199	0.096	1	1	7171.36	13	0	0	No warnings	100	0	0	0	0	0	0	0	0	0	0	0	0	0				F6
No	208.194	8.195	0.131	1	1	6606.52	13	0	0	No warnings	100	0	0	0	0	0	0	0	0	0	0	0	0	0				F5
No	208.194	8.125	0.131	1	1	3340.84	13	0	0	No warnings	100	0	0	0	0	0	0	0	0	0	0	0	0	0				F16
No	208.194	8.134	0.118	1	1	3694.06	13	0	0	No warnings	100	0	0	0	0	0	0	0	0	0	0	0	0	0				F8
No	208.194	8.111	0.11	1	1	3864.82	13	0	0	No warnings	100	0	0	0	0	0	0	0	0	0	0	0	0	0				F14
No	208.194	8.123	0.114	1	1	4382.15	13	0	0.0588735	No warnings	99.2346	0.765356	0	0	0	0	0	0	0	0	0	0	0	0				F1
No	208.194	8.127	0.118	1	1	2753.4	13	0	0	No warnings	100	0	0	0	0	0	0	0	0	0	0	0	0	0				F15
No	208.194	8.182	0.116	1	1	5965.31	13	0	0	No warnings	100	0	0	0	0	0	0	0	0	0	0	0	0	0				F7
No	209.033	7.268	0.104	2	1	6215.29	4	0	0	No warnings	100	0	0	0	0													F16
No	209.033	7.274	0.105	2	1	6883.61	4	0	0	No warnings	100	0	0	0	0													F14
No	209.033	7.304	0.105	1	1	4205.06	4	0	0	No warnings	100	0	0	0	0													F1
No	209.033	7.279	0.094	2	1	6734.49	4	0	0.255208	No warnings	98.9792	1.02083	0	0	0													F15
No	209.033	7.289	0.13	1	1	4595.17	4	0	0	No warnings	100	0	0	0	0													F5
No	209.033	7.295	0.096	1	1	5314.81	4	0	0	No warnings	100	0	0	0	0													F6
No	209.033	7.292	0.112	1	1	6702.66	4	0	0	No warnings	100	0	0	0	0													F7
No	209.033	7.283	0.093	2	1	5579.16	4	0	0	No warnings	100	0	0	0	0													F13
No	209.033	7.274	0.09	2	1	5019.74	4	0	0.0671748	No warnings	99.7313	0.268699	0	0	0													F8
No	209.033	2.499	0.109	1	1	1427.57	4	3	74.9993	Contaminating mass	0	0	0.00267528	99.9973	0													F1
No	209.033	2.546	0.096	2	1	8650.81	4	1.5	36.6967	Irregular exchange	51.0707	0	0.001309	48.928	0													F14
No	209.033	2.551	0.097	2	1	8417.41	4	1.9	47.596	Contaminating mass	36.5381	0	0.00169778	63.4602	0													F7
No	209.033	2.641	0.105	2	1	3806.01	4	0.4	8.76029	Irregular exchange	88.3195	0	0.000312486	11.6802	0													F16
No	209.033	2.547	0.088	2	1	3215.9	4	1.6	41.0116	Contaminating mass	45.3174	0	0.00146291	54.6811	0													F5
No	209.033	2.6	0.088	1	1	2398.06	4	0	0	No warnings	100	0	0	0	0													F6
No	209.033	2.621	0.105	2	1	2917.02	4	0.1	2.42088	No warnings	96.7721	0	8.63544e-05	3.22778	0													F8
No	209.033	2.526	0.091	2	1	6571.87	4	1.6	39.4779	Irregular exchange	47.3623	0	0.00140821	52.6363	0													F13
No	209.033	2.595	0.105	2	1	9494.06	4	1.8	44.6428	Irregular exchange	40.4757	0	0.00159244	59.5227	0													F15
No	209.069	6.296	0.056	6	2	67692.3	10	5.5	55.0706	Irregular exchange	35.4114	0	3.32988	0.0670522	0	0.647984	0	2.44149e-05	6.86174	51.1076	2.57433							F15
No	209.069	6.293	0.063	4	2	31398.7	10	2.1	20.5003	Contaminating mass	71.4987	0	3.96885	0.0144712	0	3.13717	3.28387e-05	0	16.2355	0	5.14519							F6
No	209.069	6.301	0.063	7	2	71844	10	7.3	73.2667	Irregular exchange	10.346	0	2.28005	0.391317	0.752375	10.7545	0	6.69372	6.87172	50.7821	11.1282							F14
No	209.069	6.298	0.073	6	2	44393.6	10	1.1	11.1349	Contaminating mass	78.3808	0	7.46333	0.407346	1.26408	5.68677	0	2.04876	0.0603157	1.02962e-07	4.6886							F1
No	209.069	6.29	0.065	7	2	29781	10	0.9	8.65456	Contaminating mass	83.6376	0	5.1342	0.244323	1.24405	3.39991	8.07446e-06	1.66051e-06	3.58313	2.66437	0.0924047							F5
No	209.069	6.301	0.062	7	2	62513.6	10	7.2	72.0008	Irregular exchange	14.5408	0	2.47372	0.828176	0.0450232	0.369758	0	14.7217	6.59881	49.5157	10.9064							F13
No	209.069	6.288	0.066	4	2	46329.3	10	0.3	3.0754	Contaminating mass	93.2718	0.766456	2.1338	4.77541e-05	0	1.63607	1.1462e-05	0	2.18951	0	0.00232824							F8
No	209.069	6.296	0.059	7	2	54003.4	10	7.5	74.5741	Irregular exchange	12.4125	0	2.7127	0.715553	2.0349	0.520555	0	0.34505	7.21611	73.1444	0.898212							F16
No	209.069	6.291	0.069	5	2	30753.9	10	1.1	11.287	Contaminating mass	80.3333	0	5.48497	6.77179e-05	1.14847	2.32003	1.15296e-05	0	10.7132	0	0							F7
No	209.069	7.674	0.091	4	1	7896.17	10	5.5	54.5336	Irregular exchange	18.0349	0	11.0287	0	11.0532	0	0	0	59.8832	0	0							F16
No	209.069	7.692	0.102	4	1	5400.95	10	4.9	49.4315	Irregular exchange	16.8139	0	19.7134	0	13.2234	0	0	0	50.2494	0	0							F14
No	209.069	7.721	0.086	3	1	5434.16	10	1.4	14.0284	Irregular exchange	56.3937	0	17.0706	0	26.5357	0	0	0	0	0	0							F15
No	209.069	7.728	0.113	4	1	5260.47	10	3.6	35.8602	Contaminating mass	32.6277	0	24.496	0	8.35012	0	0	0	34.5262	0	0							F7
No	209.069	7.73	0.049	4	1	5702.03	10	4.9	49.4981	Contaminating mass	23.4851	0	14.266	0	7.88547	0	0	0	54.3634	0	0							F8
No	209.069	7.781	0.07	4	1	4480.14	10	3.9	39.2666	Contaminating mass	37.4397	0	12.261	0	8.56242	0	0	0	41.7368	0	0							F5
No	209.069	7.718	0.081	5	1	2917.76	10	1.5	14.5119	Contaminating mass	56.8391	0	27.794	3.62008	3.82578	0	0	0	7.921	0	0							F1
No	209.069	7.749	0.147	4	1	4939.89	10	3	30.0278	Irregular exchange	38.9663	0	15.267	0	24.0973	0	0	0	21.6694	0	0							F13
No	209.069	7.767	0.088	4	1	5094.23	10	4.1	41.2632	Contaminating mass	30.3638	0	15.5373	0	12.8084	0	0	0	41.2905	0	0							F6
No	209.082	7.822	0.124	1	1	4701.9	7	1.6	23.4259	Irregular exchange	75.0739	0	0	0	0	5.25059	0	19.6755										F16
No	209.082	7.8	0.117	1	1	11396.4	7	0	0.00382154	No warnings	99.9946	0	0	0	0	0.00535015	0	0										F5
No	209.082	7.795	0.139	1	1	6563.42	7	0	0.0101022	No warnings	99.9899	0	0	0	0	0	0	0.0101022										F1
No	209.082	7.81	0.279	1	1	9027.1	7	0	0	No warnings	100	0	0	0	0	0	0	0										F15
No	209.082	7.802	0.149	1	1	8076.5	7	0	0	No warnings	100	0	0	0	0	0	0	0										F13
No	209.082	7.798	0.117	1	1	5682.24	7	0	0	No warnings	100	0	0	0	0	0	0	0										F6
No	209.082	7.843	0.031	2	1	16108.2	7	3.1	44.6728	Irregular exchange	47.7797	0	0	0	0	0.612238	51.6081	0										F14
No	209.082	7.811	0.099	1	1	6319.52	7	0	0	No warnings	100	0	0	0	0	0	0	0										F7
No	209.082	7.796	0.14	1	1	8752.01	7	0	0.00540296	No warnings	99.9946	0	0	0	0	0	0	0.00540296										F8
No	209.09	2.951	0.075	1	1	12053.3	7	0	0.00139279	No warnings	99.9976	0	0	0	0.00243738	0	0	0										F5
No	209.09	2.945	0.073	1	1	9048.56	7	0	0.00137448	No warnings	99.9976	0	0	0	0.00240535	0	0	0										F13
No	209.09	2.955	0.081	1	1	11571.1	7	0	0	No warnings	100	0	0	0	0	0	0	0										F14
No	209.09	2.953	0.081	2	1	8903.65	7	0	0.118827	No warnings	99.5841	0	0.415895	0	0	0	0	0										F15
No	209.09	2.949	0.078	1	1	13796.7	7	0	0	No warnings	100	0	0	0	0	0	0	0										F7
No	209.09	2.945	0.077	1	1	10032.9	7	0	0.00180785	No warnings	99.9968	0	0	0	0.00316374	0	0	0										F6
No	209.09	2.949	0.077	1	1	10303	7	0	0	No warnings	100	0	0	0	0	0	0	0										F8
No	209.09	2.909	0.07	2	1	1737.43	7	1	14.9483	Contaminating mass	47.6811	0	52.3189	0	0	0	0	0										F1
No	209.09	2.952	0.089	1	1	9713.13	7	0	0	No warnings	100	0	0	0	0	0	0	0										F16
No	209.103	7.472	0.065	5	2	111672	7	0.9	12.4503	Irregular exchange	82.3068	0.999211	0	0	0	14.1187	2.46811	0.107218										F13
No	209.103	7.477	0.064	4	2	71453.3	7	1.1	15.2375	Contaminating mass	78.3579	0.581733	0	0	0.000455359	20.2813	0.777772	0.000837612										F7
No	209.103	7.479	0.065	4	2	82165.9	7	0.8	12.0811	Contaminating mass	82.4252	0.885843	0	0	0	16.4561	0.228918	0.00395178										F8
No	209.103	7.477	0.062	3	2	87235.4	7	1.1	15.1294	Contaminating mass	78.3235	0.619679	0	0	0	21.056	0	0.000844614										F6
No	209.103	7.479	0.063	5	2	73651.4	7	1.2	16.8236	Irregular exchange	76.4363	0.704069	0	0	0	20.0986	2.75868	0.0023266										F16
No	209.103	7.475	0.064	2	2	53947.1	7	0	0.373234	No warnings	98.2222	1.59987	0	0	0	0.116227	0	0.0616623										F1
No	209.103	7.472	0.064	4	2	64254	7	1	14.1376	Irregular exchange	80.1919	0.722065	0	0	0	16.2753	2.81007	0.00059362										F14
No	209.103	7.481	0.06	4	2	71964.5	7	0.8	11.1356	Contaminating mass	83.9149	0.680605	0.00285361	0	0.000339433	15.1469	0.253846	0.000585555										F5
No	209.103	7.484	0.069	4	2	44364.7	7	1.7	24.1082	Irregular exchange	66.437	0.747269	0.0211117	0	0.000603753	28.8034	3.9857	0.00487223										F15
No	209.153	5.456	0.069	1	1	2985.02	11	0	0	No warnings	100	0	0	0	0	0	0	0	0	0	0	0						F5
No	209.153	5.949	0.035	1	1	1120.75	11	7.4	66.9794	Irregular exchange	0	0	0	0.000203239	0.00551934	40.3137	9.25875e-05	0	30.8116	0	28.8689	0						F15
No	209.153	5.466	0.054	1	1	2093.06	11	0	0	No warnings	100	0	0	0	0	0	0	0	0	0	0	0						F7
No	209.153	5.468	0.055	1	1	3123.8	11	0	0	No warnings	100	0	0	0	0	0	0	0	0	0	0	0						F8
No	209.153	5.588	0.079	1	1	7542.59	11	4.8	43.7218	Irregular exchange	44.5655	0	0	3.69927e-05	0.00100461	7.33774	5.39873e-05	0	18.3551	0	29.7406	0						F13
No	209.153	5.459	0.055	1	1	1945.02	11	0.1	0.696861	Low pattern fit	99.2335	0	0	0	0	0	0	0	0	0	0.766547	0						F6
No	209.153	5.45	0.081	1	1	2617.14	11	0	0.147356	No warnings	99.8379	0	0	0	0	0	0	0	0	0	0.162091	0						F1
No	209.178	10.829	0.1	1	1	2829.89	13	0	0	No warnings	100	0	0	0	0	0	0	0	0	0	0	0	0	0				F13
No	209.178	10.782	0.141	1	1	2255.55	13	0	0	No warnings	100	0	0	0	0	0	0	0	0	0	0	0	0	0				F1
No	209.178	10.835	0.114	1	1	4441.47	13	0	0.0917507	No warnings	98.8072	1.19276	0	0	0	0	0	0	0	0	0	0	0	0				F5
No	209.178	10.781	0.104	1	1	2984.74	13	0	0	No warnings	100	0	0	0	0	0	0	0	0	0	0	0	0	0				F14
No	209.178	10.831	0.1	1	1	2706.96	13	0	0	No warnings	100	0	0	0	0	0	0	0	0	0	0	0	0	0				F6
No	209.178	10.844	0.13	1	1	3909.61	13	0	0	No warnings	100	0	0	0	0	0	0	0	0	0	0	0	0	0				F8
No	209.178	10.78	0.144	1	1	3340.9	13	0	0.240128	No warnings	96.8783	3.12166	0	0	0	0	0	0	0	0	0	0	0	0				F15
No	209.178	10.79	0.103	1	1	2309.5	13	0	0	No warnings	100	0	0	0	0	0	0	0	0	0	0	0	0	0				F7
No	209.178	10.788	0.1	1	1	1790.34	13	0	0	No warnings	100	0	0	0	0	0	0	0	0	0	0	0	0	0				F16
No	209.19	6.915	0.055	1	1	2014.79	12	0	0	No warnings	100	0	0	0	0	0	0	0	0	0	0	0	0					F8
No	209.19	6.917	0.071	1	1	1167.94	12	0	0	No warnings	100	0	0	0	0	0	0	0	0	0	0	0	0					F6
No	209.19	6.918	0.067	2	1	15724	12	0	0	No warnings	100	0	0	0	0	0	0	0	0	0	0	0	0					F16
No	209.19	6.916	0.058	1	1	1808.23	12	0	0	No warnings	100	0	0	0	0	0	0	0	0	0	0	0	0					F7
No	209.19	6.915	0.066	1	1	2597.09	12	0	0	No warnings	100	0	0	0	0	0	0	0	0	0	0	0	0					F5
No	209.19	6.915	0.054	1	1	1908.28	12	0	0	No warnings	100	0	0	0	0	0	0	0	0	0	0	0	0					F15
No	209.19	6.914	0.06	1	1	1619.5	12	0	0	No warnings	100	0	0	0	0	0	0	0	0	0	0	0	0					F13
No	209.19	6.913	0.062	2	1	6389.91	12	0	0	No warnings	100	0	0	0	0	0	0	0	0	0	0	0	0					F1
No	209.19	6.917	0.065	1	1	1300.33	12	0	0	No warnings	100	0	0	0	0	0	0	0	0	0	0	0	0					F14
No	209.916	2.163	0.016	2	1	16525.1	2	0.2	10.1374	No warnings	83.5286	12.668	3.80335															F14
No	209.916	2.127	0.07	2	2	160046	2	0	0	No warnings	100	0	0															F6
No	209.916	2.129	0.051	1	1	136388	2	0	0	No warnings	100	0	0															F7
No	209.916	2.133	0.085	1	2	256056	2	0	0	No warnings	100	0	0															F1
No	209.916	2.141	0.083	1	2	229636	2	0	0	No warnings	100	0	0															F5
No	209.916	2.157	0.049	3	1	80517.7	2	0	2.47939	Low pattern fit	95.4908	4.05971	0.449531															F8
No	209.916	2.102	0.031	1	1	21453.2	2	0	0	No warnings	100	0	0															F13
No	209.925	2.102	0.137	1	1	69474.5	1	0	0	No warnings	100	0																F1
No	209.925	2.17	0.068	2	1	84979.9	1	0	0	No warnings	100	0																F16
No	209.925	2.119	0.155	1	1	117833	1	0	0	No warnings	100	0																F14
No	209.925	2.175	0.073	1	1	43830.2	1	0	0	No warnings	100	0																F5
No	209.925	2.121	0.046	1	1	29088.9	1	0	0	No warnings	100	0																F6
No	209.925	2.171	0.059	1	1	83224.7	1	0	0	No warnings	100	0																F15
No	209.925	2.18	0.089	2	1	87673.6	1	0	0	No warnings	100	0																F8
No	209.925	2.15	0.074	1	1	52148.9	1	0	0	No warnings	100	0																F7
No	209.925	2.074	0.07	1	1	70056.4	1	0	0	No warnings	100	0																F13
No	210.064	4.844	0.09	2	1	12713.9	9	0	0.0246514	No warnings	99.9556	0	0	0	0	0.0443725	0	0	0	0								F5
No	210.064	4.932	0.09	2	1	10568	9	0	0.0378702	No warnings	99.9574	0	0	0	0	0	0	0	0.042604	0								F1
No	210.064	4.848	0.099	3	1	17513.8	9	0.5	5.98642	Irregular exchange	89.239	0	0	0.000198882	0	10.7363	0	0	0.0244351	0								F15
No	210.064	4.854	0.102	3	1	14334.6	9	0.1	0.972051	No warnings	98.2716	0	0	3.13584e-05	0	1.69284	0	0	0.0355201	0								F13
No	210.064	4.879	0.091	2	1	14113.1	9	0	0.00813223	No warnings	99.9909	0	0	0	0	0	0	0	0.00914876	0								F6
No	210.064	4.839	0.092	3	1	19262	9	0.1	1.30954	No warnings	97.6688	0	0	4.23788e-05	0	2.28776	0	0	0.043365	0								F14
No	210.064	4.858	0.089	2	1	13992.2	9	0	0.00688257	No warnings	99.9923	0	0	0	0	0	0	0	0.00774289	0								F8
No	210.064	4.85	0.095	3	1	17794.2	9	1	10.7546	Irregular exchange	80.6613	0	0	0.000357616	0	19.3054	0	0	0.0329753	0								F16
No	210.064	4.882	0.083	1	1	18966.7	9	0	0.0102216	No warnings	99.9816	0	0	0	0	0.018399	0	0	0	0								F7
No	210.064	6.719	0.051	1	1	2819.52	9	0	0.379344	Low pattern fit	99.5732	0	0	0	0	0	0	0	0.426762	0								F13
No	210.064	6.68	0.073	1	1	3068.87	9	0	0.172143	Low pattern fit	99.8063	0	0	0	0	0	0	0	0.193661	0								F7
No	210.064	6.681	0.075	2	1	2707.14	9	0.4	4.33418	Irregular exchange	92.3452	0	0	0.000137264	0	7.40998	0	0	0.244655	0								F16
No	210.064	6.7	0.057	1	1	2450.29	9	0	0.171366	Low pattern fit	99.8072	0	0	0	0	0	0	0	0.192786	0								F5
No	210.064	6.68	0.083	2	1	2962.78	9	0.4	4.00307	Irregular exchange	92.9108	0	0	0.000127726	0	6.89508	0	0	0.193983	0								F14
No	210.064	6.662	0.076	1	1	2518.28	9	0	0.50355	Low pattern fit	99.3179	0	0	0	0	0.308408	0	0	0.373739	0								F1
No	210.064	6.692	0.052	1	1	2778.83	9	0	0.137652	Low pattern fit	99.8451	0	0	0	0	0	0	0	0.154858	0								F8
No	210.064	6.705	0.07	1	1	3097.98	9	0	0.43955	Low pattern fit	99.5055	0	0	0	0	0	0	0	0.494493	0								F6
No	210.064	6.71	0.07	1	1	2820.99	9	0	0.390575	No warnings	99.5606	0	0	0	0	0	0	0	0.439397	0								F15
No	210.079	11.112	0.071	2	1	12009.1	13	0	0	No warnings	100	0	0	0	0	0	0	0	0	0	0	0	0	0				F5
No	210.079	11.11	0.073	2	1	8151.24	13	0	0	No warnings	100	0	0	0	0	0	0	0	0	0	0	0	0	0				F14
No	210.079	11.114	0.073	2	1	27059.9	13	0	0	No warnings	100	0	0	0	0	0	0	0	0	0	0	0	0	0				F8
No	210.079	11.115	0.07	3	1	9942.89	13	0.1	1.09985	No warnings	98.2127	0	0	0	0	0	9.44328e-06	9.93217e-05	1.78715	0	0	0	0	0				F13
No	210.079	11.112	0.068	2	1	10743.7	13	0	0	No warnings	100	0	0	0	0	0	0	0	0	0	0	0	0	0				F7
No	210.079	11.119	0.066	2	1	15267.2	13	0	0	No warnings	100	0	0	0	0	0	0	0	0	0	0	0	0	0				F16
No	210.079	11.117	0.083	1	1	6925.93	13	0	0	No warnings	100	0	0	0	0	0	0	0	0	0	0	0	0	0				F6
No	210.079	11.11	0.074	2	1	30258.1	13	0	0.000278346	No warnings	99.9964	0.0036185	0	0	0	0	0	0	0	0	0	0	0	0				F1
No	210.079	11.104	0.07	3	1	7214.84	13	0.4	2.84496	No warnings	95.3769	0	0	0	0	0	2.44269e-05	0.000256915	4.62282	0	0	0	0	0				F15
No	210.087	8.611	0.157	3	4	75265.8	7	1.9	27.6107	Irregular exchange	62.0493	0	0	0.000206657	0	34.6217	3.13603	0.192809										F13
No	210.087	8.523	0.103	3	4	36669.2	7	2.6	36.788	Contaminating mass	49.1184	0	0	0.00071232	0	49.0946	0.463366	1.32297										F5
No	210.087	8.536	0.069	2	4	16236.6	7	0.8	11.4674	Contaminating mass	84.2343	0.126389	0	0.000198871	0	13.7066	1.91529	0.017175										F6
No	210.087	8.523	0.054	2	4	15494	7	2.6	37.2981	Contaminating mass	56.5298	0	0	0	0	0	43.2047	0.265529										F1
No	210.087	8.677	0.14	3	4	36816.5	7	1.5	21.007	Irregular exchange	67.0928	0	0	12.5785	0	12.7053	7.57709	0.0463329										F16
No	210.087	8.547	0.053	2	4	13849.4	7	2.6	37.7431	Contaminating mass	47.5257	0	0	0.000747302	0	51.5056	0.104352	0.863558										F8
No	210.087	8.711	0.181	2	4	43514.3	7	4.2	60.4298	Irregular exchange	16.6867	0	0	0.000276651	0	76.8911	6.40105	0.0208595										F14
No	210.087	8.48	0.082	3	4	40270.7	7	2.3	32.359	Contaminating mass	55.1169	0	0	0.000563004	0	43.2082	1.25045	0.423959										F7
No	210.087	8.658	0.16	1	4	44417	7	1.9	26.7946	Irregular exchange	62.9099	0	0	9.73827e-06	3.33387e-05	34.978	2.11205	0										F15
No	210.089	11.083	0.067	3	1	3152.19	11	2.1	19.3642	Contaminating mass	69.6036	0	0	6.03278	0	0	0.000256328	0	24.3633	0	0	0						F7
No	210.089	11.071	0.074	3	1	12069	11	2.3	20.5337	Irregular exchange	44.6176	0	36.198	0	0	0	0.000201838	0	19.1842	0	0	0						F16
No	210.089	11.071	0.073	4	1	6603.38	11	2.3	20.7863	Contaminating mass	27.28	0	58.8518	0	0	0	0.000145907	0	13.868	0	0	0						F8
No	210.089	10.811	0.031	3	1	14534.2	11	2.8	25.6606	Irregular exchange	15.9897	0	63.2829	2.02353	0	0	0.000196782	0	18.7036	0	0	0						F13
No	210.089	11.107	0.074	4	1	8241.56	11	1.6	14.205	Contaminating mass	36.3149	0	49.2305	11.5685	0	0	3.03644e-05	0	2.88606	0	0	0						F6
No	210.089	11.112	0.051	4	1	4401.67	11	2.1	18.9108	Contaminating mass	48.935	0	27.6165	6.96049	0	0	0.00017347	0	16.4879	0	0	0						F1
No	210.089	11.115	0.081	3	1	8039.89	11	1.7	15.0151	Irregular exchange	61.8104	0	23.3918	0	0	0	0.000155688	0	14.7977	0	0	0						F14
No	210.089	11.089	0.076	4	1	7190.37	11	2.3	21.0299	Contaminating mass	22.6787	0	58.6293	7.09311	0	0	0.000122031	0	11.5988	0	0	0						F5
No	210.089	11.085	0.08	4	1	5023.13	11	2.2	19.91	Irregular exchange	51.2653	0	28.5228	0	0	0	6.0005e-06	9.17375e-05	19.9423	0.269458	0	0						F15
No	210.101	6.164	0.042	3	1	7299	10	3.1	30.6593	Irregular exchange	39.0042	0.395078	0	0.000290282	0	59.0032	0	1.59726	0	0	0							F16
No	210.101	5.674	0.069	1	1	2704.92	10	0	0	No warnings	100	0	0	0	0	0	0	0	0	0	0							F6
No	210.101	5.679	0.076	2	1	3599.14	10	0.1	1.00335	Contaminating mass	96.6555	0	0	3.3445	0	0	0	0	0	0	0							F5
No	210.101	6.151	0.028	2	1	5287.71	10	2.1	20.6356	Irregular exchange	59.1933	0	0	0.00056086	0	40.2287	0	8.5094e-07	0	0.563153	0.014227							F13
No	210.101	6.15	0.051	2	1	13378.4	10	0	0.464144	No warnings	98.4529	0	0	1.54715	0	0	0	0	0	0	0							F7
No	210.101	5.637	0.077	2	1	4273.78	10	0.1	1.42266	No warnings	95.2578	0	0	4.74221	0	0	0	0	0	0	0							F13
No	210.101	6.147	0.038	3	1	3123.75	10	2.9	28.603	Irregular exchange	43.7261	0	0	0.00114292	0	53.9414	0	2.33137	0	0	0							F14
No	210.101	5.709	0.141	2	1	8721.38	10	2.1	21.3355	Contaminating mass	57.3287	0	0	0.000916294	0	42.6704	0	0	0	0	0							F8
No	210.101	6.201	0.06	2	1	8297.58	10	0.8	7.91676	Contaminating mass	82.765	1.84382	0	0	0	15.3176	0	0	0	0	0.0735924							F8
No	210.101	5.646	0.129	2	1	5022.69	10	0.4	3.55158	Contaminating mass	88.1612	0.000245777	0	11.8385	0	0	0	0	0	0	0							F7
No	210.101	5.629	0.082	4	1	10597.5	10	3	29.9691	Irregular exchange	40.7073	0	0	0.00123241	0	58.1583	0	0.203742	0.911877	0	0.0174667							F16
No	210.101	6.124	0.078	2	1	11504.9	10	2.2	21.6586	Contaminating mass	56.7491	0	0	0.000927309	0	43.1833	0	0	0	0	0.0666055							F1
No	210.101	5.651	0.07	1	1	3386.99	10	0	0	No warnings	100	0	0	0	0	0	0	0	0	0	0							F1
No	210.101	6.127	0.052	5	1	7230.12	10	2.9	29.4055	Irregular exchange	50.5812	0	0	3.78443	0	23.8758	3.26052e-05	14.6333	3.2385	3.88678	0							F15
No	210.101	6.197	0.066	1	1	5299.22	10	1.3	12.5596	Contaminating mass	87.4404	0	0	0	0	0	0	0	0	0	12.5596							F5
No	210.101	5.665	0.087	4	1	10595.2	10	3.2	31.5963	Irregular exchange	41.6999	0	0	0.00101109	0	47.7162	0	7.28371	3.29911	0	0							F15
No	210.101	5.638	0.088	3	1	3567.42	10	0.7	7.32454	Irregular exchange	90.1311	0	0	0	0	2.82479e-06	6.77527e-05	5.77535	4.05868	0	0.0348186							F14
No	210.101	6.131	0.097	1	1	5692.83	10	0	0.0155904	No warnings	99.9844	0	0	0	0	0	0	0	0	0	0.0155904							F6
No	210.162	12.083	0.071	3	1	21161.6	13	1.6	12	Contaminating mass	48.1381	0	0	51.8205	0	0	0	0	0	0	0	0	0	0.0413877				F6
No	210.162	12.031	0.078	3	1	21783.5	13	1.5	11.1756	Irregular exchange	51.3907	0.436122	0.011764	48.1275	0	0	0	0	0	0	0	0	0	0.0339004				F16
No	210.162	12.103	0.079	4	1	12645.2	13	0.5	4.11286	Contaminating mass	81.9583	2.35524	0	12.723	2.84246	0	0	0	0	0	0	0	0	0.120997				F5
No	210.162	12.031	0.071	3	1	17809.6	13	2	15.4021	Irregular exchange	47.4589	0.814268	0	47.3035	0	0	0	0	0	0	0	0	0	4.42328				F14
No	210.162	12.026	0.065	4	1	29021.4	13	1.5	11.1824	Contaminating mass	52.6272	0	0	46.0546	1.00512	0	0	2.01489e-06	0	0.220872	0	0	0	0.0922108				F1
No	210.162	12.032	0.08	2	1	7283.18	13	0	0.283375	No warnings	98.3824	1.44542	0	0	0	0	0	0	0	0	0	0	0	0.172188				F8
No	210.162	12.051	0.073	3	1	12119.2	13	1.1	8.57287	Irregular exchange	60.652	4.03293	0	35.1681	0	0	0	0	0	0	0	0	0	0.146921				F13
No	210.162	12.038	0.078	3	1	9000.04	13	0.1	0.690349	No warnings	96.7486	1.34368	0	0	1.90771	0	0	0	0	0	0	0	0	0				F7
No	210.162	12.033	0.075	3	1	19341.8	13	1.8	13.5448	Irregular exchange	41.4056	0.408052	0	58.0748	0	0	0	0	0	0	0	0	0	0.111508				F15
No	210.173	10.226	0.087	4	2	8986.25	12	3.5	29.564	Irregular exchange	25.143	0	25.7757	20.5755	0	0	10.8922	0	0	0	17.6137	0	0					F15
No	210.173	10.22	0.354	4	2	29963.2	12	5	41.2935	Irregular exchange	28.5024	0.000403845	14.189	7.12292	0	6.72484	5.61325	0	0	0	37.8471	0	0					F16
No	210.173	10.208	0.13	2	2	14622.5	12	4	33.6805	Contaminating mass	7.10203	0.0270839	41.3721	0.0815446	0.000953996	29.9678	4.03363	9.01462	0	0	8.40025	0	0					F6
No	210.173	10.298	0.391	5	2	25010.7	12	4	33.5458	Irregular exchange	8.40186	0.00769576	18.7113	36.8173	0	17.7845	4.0631	0.269146	1.71025e-07	7.03205e-06	13.9144	0.0307286	0					F14
No	210.173	10.266	0.177	3	2	14664.1	12	3.4	28.4049	Contaminating mass	22.1441	0	47.5956	0	0	0	14.2337	0	0	0	16.0266	0	0					F7
No	210.173	10.294	0.07	4	2	10638.4	12	1.2	9.91958	Contaminating mass	73.2471	0	0	3.8331	7.06355	15.8563	0	0	0	0	0	0	0					F1
No	210.173	10.288	0.094	2	2	27153.8	12	4.9	40.5395	Contaminating mass	4.43095	0.00380442	5.81146	0.117135	0.000260783	73.2292	13.7941	0.182295	1.70976e-06	0	2.43077	0	0					F5
No	210.173	10.259	0.188	4	2	14340.3	12	3.3	27.5262	Contaminating mass	41.4453	0	0	17.2637	0	25.7064	1.46379	0	0	0	14.1209	0	0					F8
No	210.173	10.366	0.234	4	2	14846.4	12	4.6	38.7487	Irregular exchange	24.5498	0	0	20.4656	0	26.3649	3.29725	0.414932	0	0	24.9076	0	0					F13
No	210.981	2.335	0.108	1	2	23294	3	1.2	40.543	Contaminating mass	43.8123	23.4672	0	32.7206														F6
No	210.981	2.217	0.11	1	2	19773.7	3	1.7	57.6587	Irregular exchange	34.1968	12.2167	0	53.5865														F16
No	210.981	2.24	0.158	1	2	61998.6	3	0.9	28.7717	Irregular exchange	64.5868	9.96227	0	25.451														F13
No	210.981	2.353	0.139	1	2	87981.5	3	1.4	45.3499	Irregular exchange	26.9973	41.4791	0	31.5235														F15
No	210.981	2.099	0.056	1	2	3592.79	3	0.3	11.4652	Contaminating mass	65.6044	34.3956	0	0														F1
No	210.981	2.352	0.269	1	2	82642.4	3	1	32.0836	Contaminating mass	34.0075	50.8634	0	15.1291														F7
No	210.981	2.221	0.195	1	2	93702.7	3	1	32.7744	Low pattern fit	37.7654	44.1904	0	18.0443														F14
No	210.981	2.397	0.142	1	2	105877	3	2	68.3131	Contaminating mass	31.2708	0.624105	0	68.1051														F8
No	210.981	2.332	0.131	1	2	76690.5	3	1.7	56.3113	Contaminating mass	13.7684	44.8804	0	41.3512														F5
No	210.993	3.472	0.091	1	4	74552.6	8	0.1	0.800242	No warnings	99.0166	0	0	0	0	0	0.659058	0.146896	0.177414									F5
No	210.993	3.47	0.082	3	4	51047.1	8	0.1	1.3365	No warnings	97.7012	0	0.134723	0.868692	0	0.74035	0	0.325495	0.22953									F14
No	210.993	3.509	0.086	1	4	45828.8	8	0.1	1.22177	No warnings	97.7161	0	0	1.58988	0	0	0	0.547426	0.146573									F15
No	210.993	3.494	0.089	1	4	66015.5	8	0.1	0.798769	No warnings	98.7349	0	0	0.563974	0	0.0170689	0.406701	0.0462002	0.23116									F16
No	210.993	3.481	0.09	1	4	92082.9	8	0.1	1.65516	Contaminating mass	97.7164	0	0	0.210806	0	0	1.91941	0.134597	0.0187818									F7
No	210.993	3.544	0.08	1	4	50194.7	8	0.1	1.68792	Contaminating mass	94.7201	3.64035e-05	4.40038	0.411632	0	0	0.109993	0.0554511	0.302442									F1
No	210.993	3.49	0.09	2	4	72610.9	8	0	0.278037	No warnings	99.5966	0	0.0427644	0.0754099	0	0	0.152875	0.0637131	0.068662									F6
No	210.993	3.487	0.089	1	4	63316.4	8	0	0.617767	No warnings	98.9035	0	0	0.704994	0	0	0	0.304936	0.086575									F8
No	210.993	3.463	0.09	2	4	71361	8	0	0.450267	No warnings	99.2095	0	0	0.505728	0	0	0	0.192889	0.0918407									F13
No	211.042	4.425	0.106	2	1	1508.39	8	7.1	89.2236	Low pattern fit	0	0.000613258	10.9872	0	0	0	0	20.2833	68.7288									F15
No	211.042	4.501	0.18	1	1	1853.86	8	7.8	97.1516	Low pattern fit	0	0	0	0	0	0	0	22.7872	77.2128									F13
No	211.042	4.272	0.13	1	1	1384.8	8	7.8	97.1516	Contaminating mass	0	0	0	0	0	0	0	22.7872	77.2128									F6
No	211.042	4.425	0.09	2	1	6419.02	8	0.1	0.678738	No warnings	98.2333	1.22574	0	0	0	0	0	0.123262	0.417666									F8
No	211.042	4.565	0.347	1	1	2601.76	8	7.5	93.2989	Low pattern fit	0	4.55126	0	0	0	0	0	21.7501	73.6987									F14
No	211.042	4.45	0.151	1	1	1001.13	8	7.8	97.1516	Low pattern fit	0	0	0	0	0	0	0	22.7872	77.2128									F16
No	211.042	4.382	0.177	2	1	2368.85	8	6.7	84.3748	Contaminating mass	0	0	17.7083	0	0	0	0	18.7519	63.5398									F1
No	211.045	2.456	0.141	2	1	42744.3	7	4.5	64.1648	Low pattern fit	0.000220879	1.22542	0	0	48.7047	48.6892	0	1.38041										F16
No	211.045	2.452	0.093	1	1	28083.6	7	4	57.1632	No warnings	0	0	0.0291141	0.00296528	99.898	0	0.00600314	0.0638779										F13
No	211.045	2.469	0.091	2	1	13614.1	7	4.3	62.0734	Contaminating mass	0	17.3151	0	0	0	80.7979	0	1.88698										F5
No	211.045	2.448	0.13	2	1	29435.9	7	4.1	58.5592	Low pattern fit	0.000204999	1.1273	0	0	89.6461	7.19101	0	2.03542										F14
No	211.045	2.474	0.098	2	1	51196	7	4.2	59.8524	Contaminating mass	7.15946e-05	0.64226	0	0	80.3521	18.0613	0	0.94423										F7
No	211.045	2.429	1.28	2	1	35919.2	7	4.9	69.6614	Contaminating mass	0	0.618268	0.0236927	0	9.89245	89.4323	0	0.0332468										F1
No	211.045	2.467	0.107	2	1	40018.2	7	4.8	68.0659	Contaminating mass	0	1.00929	0	0	19.7311	79.1449	0	0.114772										F6
No	211.045	2.439	0.111	1	1	21184.5	7	5.1	73.0681	Low pattern fit	0	0	0.0483133	0	0	94.1408	0	5.81086										F15
No	211.045	2.487	0.106	2	1	33252.5	7	5	71.2497	Contaminating mass	0	0	0.054356	1.41561	0	97.659	0	0.871061										F8
No	211.046	13.789	0.069	1	1	7447.09	13	1.1	8.58817	Contaminating mass	81.9795	0	0	0	0.0032489	11.2487	0	0	6.45839	0	0	0	0.310234	0				F7
No	211.046	13.767	0.064	1	1	5225.54	13	0.3	2.53953	Low pattern fit	94.673	0	0	0	0.000937163	3.24474	0	0	2.04741	0	0	0	0.033928	0				F16
No	211.046	13.776	0.076	3	1	3872.42	13	1.3	10.3365	Contaminating mass	68.1762	0	0	0	30.054	0	0	0	1.76982	0	0	0	0	0				F6
No	211.046	13.764	0.075	1	1	12572.1	13	3.5	27.0051	Contaminating mass	33.0974	0	0	0	0.0177227	61.3611	0	0	5.52378	0	0	0	0	0				F8
No	211.046	13.763	0.069	1	1	2638.45	13	0.1	0.860738	No warnings	97.7981	0	0	0	0.00062833	2.17546	0	0	0	0	0	0	0.025813	0				F15
No	211.046	13.763	0.063	2	1	7579.67	13	0.6	4.96157	Low pattern fit	89.3067	0	0	0	0.00204526	7.08129	0	0	3.55852	0	0	0	0.0514702	0				F13
No	211.046	13.79	0.056	2	1	9185.26	13	3.1	24.003	Contaminating mass	24.267	0	0	0.00619313	73.5932	0	0	0	2.01793	0	0	0	0	0.115714				F1
No	211.046	13.753	0.06	2	1	3888.19	13	0.7	5.57112	Contaminating mass	82.3814	0	0	0.000705126	17.1302	0	0	0	0.487709	0	0	0	0	0				F5
No	211.046	13.763	0.082	2	1	3295.7	13	1.3	9.85691	Irregular exchange	74.4206	0	0	0	0.00737553	25.5363	0	0	0	0	0	0	0.035743	0				F14
No	211.046	2.133	0.087	1	1	15808	13	0.6	4.30273	Contaminating mass	95.6115	0	0	0	0	0	0	0	0	0.278882	0	0	0	4.10966				F8
No	211.046	2.147	0.085	2	1	14841.4	13	1.3	9.69983	Contaminating mass	84.4881	0	0	0	0.00338255	9.1536	0	0	0	0.574316	0	0	0	5.78058				F6
No	211.046	2.151	0.051	4	1	15065.4	13	2.4	18.0961	Irregular exchange	68.9579	0	0	3.74551e-05	0.00111065	3.13503	0	23.8387	0	0.0436741	0	0	0	4.02357				F16
No	211.046	2.146	0.052	6	1	12833.7	13	1.2	8.93983	Irregular exchange	83.1925	0	0	0.110327	1.52344	0	0	14.5775	0	0	0	0	1.42556e-05	0.596167				F14
No	211.046	2.142	0.075	6	1	44562.4	13	1.9	14.4219	Low pattern fit	75.7811	0	0.338922	0.269533	0	3.87412	0	14.5146	0.083738	0	0	0.000333625	2.43898	2.69876				F13
No	211.046	2.138	0.048	3	1	18625	13	1.2	9.05771	Contaminating mass	86.7815	0	0	7.33023e-05	0.00247073	6.65297	0	0	0	0.210872	0	0	0	6.35211				F7
No	211.046	2.149	0.095	2	1	18846.2	13	0.5	3.49348	Contaminating mass	92.7693	0	0	6.51237e-05	0.00219506	5.91068	0	0	0	0.319515	0	0	0	0.998247				F5
No	211.046	2.17	0.044	4	1	24456.4	13	1.7	13.2418	Low pattern fit	77.8494	0	0	0.000952682	1.81941	0	0	16.042	0.635619	0	0	0	0	3.65257				F15
No	211.046	2.926	0.037	4	2	50547.3	5	3.4	68.054	Irregular exchange	16.343	2.67756	0.407102	7.89816	50.2874	22.3869												F13
No	211.046	2.952	0.039	4	2	51771.4	5	3.4	67.9729	Irregular exchange	15.9398	1.67179	0.0614532	4.11568	65.3335	12.8778												F16
No	211.046	2.922	0.023	2	2	11869.5	5	0.1	1.4501	No warnings	93.8388	5.87744	0	0	0.0459576	0.237841												F8
No	211.046	2.956	0.079	4	2	18508.5	5	1.3	26.4491	Irregular exchange	62.0905	0.91931	0	16.984	19.6564	0.349743												F14
No	211.046	2.95	0.093	4	2	18925.7	5	0.5	9.67696	Contaminating mass	88.1465	0.125733	0	0	10.3796	1.34813												F6
No	211.046	2.955	0.05	3	2	14662.6	5	1.7	34.577	Irregular exchange	49.3722	1.62017	0	24.8032	24.1668	0.0376104												F15
No	211.046	2.964	0.086	2	2	84973.9	5	2.7	54.9166	Contaminating mass	33.15	0.296981	0.000447907	0.333362	57.8109	8.40827												F7
No	211.046	2.956	0.079	4	2	54099.8	5	2.4	48.959	Contaminating mass	40.468	0.0568933	0	0.494675	51.6483	7.33215												F5
No	211.061	6.758	0.088	1	1	19285.3	7	0.3	4.02816	Contaminating mass	95.2124	0	0	0	0.152803	2.4289	0	2.20591										F5
No	211.061	6.695	0.325	1	1	18943.3	7	0.2	3.06501	Contaminating mass	96.0805	0	0	0	0.0564494	2.90616	0	0.956925										F8
No	211.061	6.708	0.09	1	1	5536.91	7	0.1	1.18102	Low pattern fit	98.4392	0	0	0	0.0593281	1.24012	0	0.26131										F13
No	211.061	6.843	0.029	1	1	19909	7	1.6	22.2014	Contaminating mass	75.8263	0.487468	0	0	0.898282	4.0931	0	18.6948										F1
No	211.061	6.811	0.063	2	1	11443.7	7	3.4	48.4103	Low pattern fit	37.6963	0.50557	0	0	0.0919341	32.238	29.4682	0										F15
No	211.061	6.707	0.093	1	1	9636.89	7	0.2	2.52131	Contaminating mass	96.7485	0	0	0	0	2.26267	0.585741	0.403054										F7
No	211.061	6.772	0.023	1	1	6797.34	7	1.6	22.449	Low pattern fit	74.9804	0	0	0	4.9354	1.59403	0	18.4902										F14
No	211.061	6.809	0.042	4	1	13726.6	7	3	42.7764	Irregular exchange	52.927	0	0	0	1.12937	1.22652	24.2352	20.482										F16
No	211.061	6.66	0.099	1	1	7002.16	7	0.1	1.45652	Contaminating mass	97.9609	0	0	0	0	2.03913	0	0										F6
No	211.075	6.368	0.138	1	1	1728.51	4	0	0.0142864	No warnings	99.981	0	0	0.0190486	0													F13
No	211.075	6.355	0.225	1	1	3311.52	4	0	0	No warnings	100	0	0	0	0													F1
No	211.075	6.364	0.092	2	1	1880.3	4	0.6	13.7723	Contaminating mass	72.4554	0	27.5446	0	0													F6
No	211.075	6.365	0.088	2	1	1924.54	4	0.3	6.59194	Irregular exchange	86.8161	0	13.1839	0	0													F16
No	211.075	6.354	0.095	1	1	1288.62	4	0	0	No warnings	100	0	0	0	0													F5
No	211.075	6.369	0.083	2	1	2328.15	4	0.2	4.92493	Contaminating mass	90.1501	0	9.84985	0	0													F7
No	211.075	6.353	0.123	2	1	2756.39	4	0.1	3.40244	Irregular exchange	93.1951	0	6.80488	0	0													F14
No	211.075	6.342	0.096	2	1	2196.45	4	0.3	7.86984	Contaminating mass	84.2603	0	15.7397	0	0													F8
No	211.085	6.96	0.082	1	1	3970.31	10	0	0	No warnings	100	0	0	0	0	0	0	0	0	0	0							F8
No	211.085	6.93	0.119	3	1	7919.56	10	2.4	24.4972	Irregular exchange	67.7508	0	0.347165	2.18758	0	0	0.000156325	0	29.7143	0	0							F13
No	211.085	6.965	0.073	1	1	4327.24	10	1.5	15.3274	Contaminating mass	84.6726	0	0	0	0	0	0	0	0	0	15.3274							F1
No	211.085	6.947	0.077	2	1	7637.32	10	4	39.8937	Contaminating mass	50.1458	0	0	0	0	0	0.000262002	0	49.8016	0	0.0523259							F5
No	211.085	6.976	0.082	2	1	7741.81	10	2.7	27.3475	Contaminating mass	65.8155	0	0	0	0	0	0.000179841	0	34.1843	0	0							F7
No	211.085	6.975	0.078	3	1	3729.02	10	1.6	16.2207	Irregular exchange	79.7241	0	0	0	0	0	0.000106669	0	20.2758	0	0							F14
No	211.085	6.984	0.088	3	1	3570.06	10	1.1	11.1537	Irregular exchange	84.6931	0	0	2.18365	0	0	6.904e-05	0	13.1232	0	0							F15
No	211.085	6.975	0.067	2	1	4887.88	10	1.3	12.5024	Contaminating mass	84.372	0	0	0	0	0	8.22172e-05	0	15.6279	0	0							F6
No	211.085	6.963	0.065	1	1	2384.96	10	0	0	No warnings	100	0	0	0	0	0	0	0	0	0	0							F16
No	211.1	10.699	0.066	3	1	11861.8	6	0.9	14.4961	Contaminating mass	61.4007	14.4107	0	24.1887	0	0	0											F5
No	211.1	10.718	0.067	3	1	5470.57	6	1.6	26.1064	Irregular exchange	41.6579	9.19407	0	49.148	0	0	0											F16
No	211.1	10.706	0.063	3	1	5343.38	6	1.4	23.0285	Contaminating mass	40.1972	20.6186	0	39.1842	0	0	0											F7
No	211.1	10.709	0.07	2	1	10848.9	6	0.6	10.4354	Contaminating mass	53.771	38.0425	0	8.18289	0	0	0.00356483											F1
No	211.1	10.718	0.063	2	1	2877.3	6	1.9	32.4061	Contaminating mass	35.1879	0	0	64.8121	0	0	0											F6
No	211.1	10.716	0.06	3	1	9272.35	6	1.3	21.8794	Irregular exchange	43.3409	19.3504	0	37.3087	0	0	0											F14
No	211.1	10.721	0.071	3	1	13853.1	6	1.6	26.5064	Irregular exchange	24.8993	33.1318	0	41.9689	0	0	0											F13
No	211.1	10.693	0.064	3	1	5198.4	6	1.9	32.2647	Irregular exchange	30.5245	7.41926	0	62.0563	0	0	0											F15
No	211.1	10.704	0.066	3	1	10336.2	6	1.8	29.7407	Contaminating mass	35.2644	7.88133	0	56.8543	0	0	0											F8
No	211.111	6.857	0.072	5	1	51565.4	13	6.4	48.9661	Irregular exchange	24.6061	0	0	0	0	0.000417261	38.7976	0.29173	0	0	0.000136842	33.9194	2.38456	0				F13
No	211.111	6.843	0.071	7	1	51402.2	13	5.9	45.7038	Contaminating mass	22.1195	0	0	0	0.652656	0.795147	51.385	0	0	0	9.07672e-05	22.4609	1.44453	1.14218				F1
No	211.111	6.85	0.084	5	1	33302.9	13	4	31.0235	Irregular exchange	40.2517	0	0	0	0	0.144459	51.2627	0	0	0	2.00053e-05	5.08642	3.25466	0				F16
No	211.111	6.864	0.077	8	1	73232.3	13	5.4	41.4972	Contaminating mass	30.5878	0	0	0	0	0.505484	44.9503	0.599246	0	0	7.85168e-05	19.4396	1.7244	2.19304				F5
No	211.111	6.891	0.066	4	1	55458.6	13	5.3	40.46	Low pattern fit	35.0108	0	0	0	0	0.0199804	38.1201	0	0	0	0.000100967	25.0298	1.81927	0				F15
No	211.111	6.862	0.073	6	1	82114.9	13	7.2	55.1698	Contaminating mass	17.0831	0.0590878	0	0	0	0.000421827	39.2248	0.364548	0	0	0.000165008	40.8138	1.6118	0.842349				F7
No	211.111	6.847	0.113	7	1	61493.2	13	6.9	53.2738	Contaminating mass	20.7778	0	0	0	0	0.358893	37.0491	0	0	0	0.000145749	36.0803	2.95301	2.78071				F8
No	211.111	7.003	0.08	6	1	73354.1	13	7.3	56.3485	Contaminating mass	15.7679	0.0533373	0	0.000122774	0.266712	0.0012598	38.7637	0	0	0	0.000173386	42.942	2.2048	0				F6
No	211.111	6.839	0.078	7	1	40949.4	13	3.7	28.6225	Low pattern fit	35.6693	0	0	12.7153	0	0.0559547	47.2243	0	0	0	6.41514e-06	1.70094	2.63428	0				F14
No	211.122	3.7	0.026	3	1	17514	11	6.1	55.0542	Irregular exchange	3.42609	0.211283	0.00144659	33.1014	0	0	0.000491674	0	63.2593	0	0	0						F15
No	211.122	3.57	0.072	2	1	3489.98	11	5.4	48.8433	Irregular exchange	0	0.00243854	0.0064217	52.5335	0	0	0.000368855	0	47.4573	0	0	0						F14
No	211.122	3.55	0.037	2	1	15901.4	11	7	63.4561	Irregular exchange	11.7376	0	0	0.00105548	0	2.69184	0.000665072	0	85.5689	0	0	0						F16
No	211.122	3.908	0.017	3	1	22284.6	11	3.7	33.2913	Contaminating mass	26.0486	0	0	45.0814	0	0	0.000198888	0	28.8698	0	0	0						F5
No	211.122	3.582	0.094	4	1	4787.09	11	4.1	37.112	Contaminating mass	13.9526	0	0	44.007	0	20.0374	0	0	22.0029	0	0	0						F1
No	211.122	3.746	0.006	2	1	9703.12	11	1.6	14.8152	Contaminating mass	45.6778	0	0	54.3222	0	0	0	0	0	0	0	0						F6
No	211.122	3.968	0.05	3	1	28905.7	11	3	27.57	Irregular exchange	36.4525	0	0	41.0219	0	0	0.000175075	0	22.5254	0	0	0						F13
No	211.122	3.973	0.013	2	1	18137	11	3.9	35.2602	Contaminating mass	14.472	0.00265837	0.00700059	59.3713	0	0	0.000201063	0	25.869	0	0.277927	0						F7
No	211.122	3.687	0.055	3	1	4596.2	11	5.5	49.669	Contaminating mass	6.04713	0.000923593	0.0024322	41.0484	0	0	0.000411163	0	52.9007	0	0	0						F8
No	211.136	14.748	0.085	4	1	67558.7	15	0.3	1.95501	Contaminating mass	92.0029	5.82199	0	0	0	0	0	3.57931e-05	0.140767	0	0	2.03426	0	0	0	0		F1
No	211.136	14.738	0.082	6	1	76007.4	15	0.4	2.58268	No warnings	95.4596	0.892686	0	0	0	0	0	0.000205992	0.810125	0	0	2.68339	0.153984	0	0	0		F14
No	211.136	14.734	0.082	4	1	62164	15	0.1	0.792057	Contaminating mass	95.9329	3.28576	0	0	0	0	0	0	0	0	4.12076e-05	0.781335	0	0	0	0		F7
No	211.136	14.749	0.085	4	1	75398.9	15	0.4	2.6211	Contaminating mass	94.5155	1.83857	0	0	0	0	0	0.000222601	0.875445	0	0	2.77025	0	0	0	0		F6
No	211.136	14.748	0.09	4	1	76732.3	15	0.5	3.47009	No warnings	92.9766	2.10588	0	0	0	0	0	0.000266395	1.38207	0	0	3.5352	0	0	0	0		F15
No	211.136	14.728	0.088	5	1	77939	15	0.7	4.42804	Irregular exchange	92.0381	1.65677	0	0	0	0	0	0.000389156	1.53047	0	0	4.7743	0	0	0	0		F13
No	211.136	14.736	0.082	5	1	71354	15	0.5	3.49615	Contaminating mass	90.5662	4.66727	0	0	0	0	0	0.000413683	1.62693	0	0	2.91366	0.225538	0	0	0		F5
No	211.136	14.735	0.086	5	1	78833.4	15	1.3	8.91323	Contaminating mass	84.3185	3.83854	0	0	0	0	0	4.77295e-05	0.18771	0	0	11.5045	0.150739	0	0	0		F8
No	211.136	14.734	0.083	5	1	74736.4	15	0.4	2.49991	No warnings	95.6203	0.887673	0	0	0	0	0	0.000161375	0.634654	0	0	2.75354	0.103642	0	0	0		F16
No	211.194	9.877	0.09	1	1	1759.99	13	0	0.0382149	No warnings	99.8344	0	0	0.165598	0	0	0	0	0	0	0	0	0	0				F8
No	211.194	9.838	0.124	1	1	2081.02	13	0	0.0240668	No warnings	99.8957	0	0	0.104289	0	0	0	0	0	0	0	0	0	0				F1
No	211.194	9.826	0.086	1	1	2254.29	13	0	0.105515	Low pattern fit	99.5428	0	0	0.457231	0	0	0	0	0	0	0	0	0	0				F15
No	211.194	9.9	0.133	1	1	2320.04	13	0.9	6.93594	Contaminating mass	70.0465	0	0	29.9228	0	0	0	0	0	0	0	0	0	0.0306687				F6
No	211.194	9.786	0.087	1	1	1918.68	13	0	0.0492109	No warnings	99.7868	0	0	0.213247	0	0	0	0	0	0	0	0	0	0				F5
No	211.194	9.939	0.08	1	1	2193.92	13	0	0.154298	Low pattern fit	99.6383	0	0	0.269637	0	0	0	0	0	0	0	0	0	0.0920738				F16
No	211.194	9.853	0.076	1	1	1654.83	13	1.9	14.3797	Irregular exchange	54.8558	0.948824	0	38.8552	0	0	0	0	0	0	0	0	0	5.34018				F14
No	211.194	9.871	0.068	1	1	2946.81	13	0	0.0722778	Low pattern fit	99.7466	0	0	0.235447	0	0	0	0	0	0	0	0	0	0.0179439				F7
No	211.194	9.843	0.137	1	1	1716.08	13	0	0.0517227	No warnings	99.7759	0	0	0.224132	0	0	0	0	0	0	0	0	0	0				F13
No	211.23	9.346	0.076	2	1	3473.25	14	0	0	No warnings	100	0	0	0	0	0	0	0	0	0	0	0	0	0	0			F16
No	211.23	9.345	0.088	2	1	2736.68	14	0	0	No warnings	100	0	0	0	0	0	0	0	0	0	0	0	0	0	0			F13
No	211.23	9.352	0.078	1	1	2859.92	14	0	0	No warnings	100	0	0	0	0	0	0	0	0	0	0	0	0	0	0			F5
No	211.23	9.343	0.069	1	1	2501.3	14	0	0	No warnings	100	0	0	0	0	0	0	0	0	0	0	0	0	0	0			F15
No	211.23	9.346	0.075	1	1	3516.83	14	0	0	No warnings	100	0	0	0	0	0	0	0	0	0	0	0	0	0	0			F7
No	211.23	9.347	0.095	1	1	3092.53	14	0	0	No warnings	100	0	0	0	0	0	0	0	0	0	0	0	0	0	0			F1
No	211.23	9.345	0.091	1	1	3208.44	14	0	0	No warnings	100	0	0	0	0	0	0	0	0	0	0	0	0	0	0			F14
No	211.23	9.348	0.089	1	1	2645.36	14	0	0	No warnings	100	0	0	0	0	0	0	0	0	0	0	0	0	0	0			F8
No	211.23	9.346	0.065	2	1	3003.51	14	0	0	No warnings	100	0	0	0	0	0	0	0	0	0	0	0	0	0	0			F6
No	211.23	8.364	0.087	1	1	1277.24	14	0	0	No warnings	100	0	0	0	0	0	0	0	0	0	0	0	0	0	0			F7
No	211.23	8.369	0.079	1	1	1884.95	14	0	0	No warnings	100	0	0	0	0	0	0	0	0	0	0	0	0	0	0			F8
No	211.23	8.376	0.078	1	1	1197.2	14	0	0	No warnings	100	0	0	0	0	0	0	0	0	0	0	0	0	0	0			F5
No	211.23	8.37	0.067	1	1	1054.93	14	0	0	No warnings	100	0	0	0	0	0	0	0	0	0	0	0	0	0	0			F1
No	212.03	3.683	0.067	3	1	2154.3	13	2	15.57	Irregular exchange	70.5295	0	0	8.75248e-05	0.00127929	4.06861	0	24.442	0	0	0	0.534625	0.423853	0				F13
No	212.03	3.89	0.01	3	1	20506	13	9.5	72.9655	Contaminating mass	18.0635	3.94365e-05	0.0497039	0.000308641	0.712107	0	0	7.02787	0.400636	0	0.000171053	0.711812	64.0693	8.96457				F6
No	212.03	3.693	0.009	2	1	3174.1	13	3	22.8133	Contaminating mass	76.2258	0	0	0	0	0	0	0	2.15818	0	0	0.518337	0.66497	20.4328				F8
No	212.03	3.829	0.011	5	1	23061.7	13	10.3	79.3206	Contaminating mass	11.1383	0	0	0.000136841	0.301138	1.00905	0	5.96324	0.101246	0.0269198	6.37713e-05	0.43472	75.9873	5.03792				F7
No	212.03	3.817	0.019	1	1	1825.45	13	13	100	Low pattern fit	0	0	0	0	0	0	0	0	0	0	0	0	0	100				F16
No	212.03	3.85	0.007	1	1	2169.26	13	13	100	Contaminating mass	0	0	0	0	0	0	0	0	0	0	0	0	0	100				F5
No	212.03	3.893	0.013	3	1	26096.7	13	4.5	34.6323	Irregular exchange	9.33777	1.84888	4.28644	0.0280171	64.9317	2.08138	0	5.49177	2.32385	0.330714	0	5.75688	0.328985	3.25363				F15
No	212.03	3.766	0.086	5	1	4754.11	13	2.7	20.422	Contaminating mass	60.7394	0	0	7.67315e-05	17.3929	2.85187	0	3.45242	0.173636	0	14.2888	0	1.10094	0				F1
No	212.03	3.747	0.01	4	1	21254.6	13	10.3	78.8887	Irregular exchange	9.42935	0	2.17936	0	0	3.41113	0.000309092	2.59016	1.3146e-05	0.0379554	2.24481	0.0018547	78.1697	1.93532				F14
No	212.059	11.551	0.074	1	1	1432.63	4	0	0.147183	No warnings	99.8528	0	0	0	0.147183													F13
No	212.059	11.54	0.076	1	1	1344.81	4	0	0.523258	No warnings	99.4767	0	0	0	0.523258													F1
No	212.059	11.559	0.082	1	1	2052.75	4	0	0.144383	No warnings	99.8556	0	0	0	0.144383													F14
No	212.059	11.558	0.083	2	1	2737.25	4	0	1.06166	No warnings	96.15	3.7178	0	0	0.132212													F6
No	212.059	11.552	0.074	2	1	2105.14	4	0	0.887457	No warnings	97.2903	2.42959	0	0	0.280059													F5
No	212.059	11.557	0.074	2	1	3269.15	4	0.1	1.72246	No warnings	93.5172	6.34718	0	0	0.135663													F16
No	212.059	11.553	0.063	2	1	1847.48	4	0.1	1.52164	No warnings	94.4481	5.3737	0	0	0.178209													F8
No	212.059	11.551	0.071	2	1	2580.23	4	0	0.906688	No warnings	96.839	3.00573	0	0	0.155257													F7
No	212.059	11.553	0.071	2	1	1976.16	4	0	0.959487	No warnings	96.7822	3.01104	0	0	0.206728													F15
No	212.059	7.536	0.103	4	1	26310.4	12	5	41.722	Contaminating mass	25.4447	0	0	0	0.023715	0	43.3674	9.29568	21.753	0	0	0.115627	0					F8
No	212.059	7.567	0.078	4	1	30401	12	4.4	36.6898	Contaminating mass	32.8525	0	0	0	0.0159116	0	46.2684	4.64239	16.1073	0	0	0.1135	0					F5
No	212.059	7.553	0.095	3	1	13542.1	12	1.4	11.4966	Low pattern fit	77.3408	0	0	0	0	0.000137803	21.7287	0.661734	0	0	0	0.2686	0					F16
No	212.059	7.536	0.078	4	1	31249.4	12	5.1	42.3627	Contaminating mass	22.4302	0	0	0	0.00359409	0	49.0129	14.5902	13.8237	0	0	0.132952	0.00653596					F6
No	212.059	7.54	0.08	4	1	31832.6	12	4.2	35.2876	Contaminating mass	37.0164	0	0	0	0.0252597	0	38.1738	4.37506	20.2745	0	0	0.133607	0.00137287					F7
No	212.059	7.488	0.077	4	1	50149.9	12	5	41.6487	Irregular exchange	25.4576	0	0	0.000101845	0.232893	6.35848	30.9725	14.7806	22.1383	0	0	0.0594772	0					F14
No	212.059	7.537	0.077	4	1	19781.3	12	4.5	37.5109	Irregular exchange	33.5807	0	0	0	0.00822579	0	35.4632	10.4179	20.4787	0	0	0.0512728	0					F15
No	212.059	7.579	0.081	4	1	44365.8	12	4.4	37.0601	Contaminating mass	33.24	0	0	0	0.00361391	0	44.7073	1.75903	19.6934	0	0	0.557417	0.0392247					F1
No	212.059	7.454	0.084	4	1	14814.2	12	4.3	35.713	Irregular exchange	38.0897	0	0	0	0.0184084	0	30.2964	6.67341	24.7176	0	0	0.204458	0					F13
No	212.059	9.313	0.077	1	1	6373.35	5	0	0.72587	Low pattern fit	99.0927	0	0	0	0.907338	0												F14
No	212.059	9.336	0.094	1	1	4346.55	5	0	0.899402	No warnings	98.8757	0	0	0	1.12425	0												F8
No	212.059	9.362	0.076	1	1	4301.16	5	0	0	No warnings	100	0	0	0	0	0												F7
No	212.059	9.309	0.086	2	1	5239.2	5	0	0.488483	No warnings	99.1764	0.284016	0	0	0.5396	0												F16
No	212.059	9.339	0.1	1	1	6120.74	5	0	0.418972	Low pattern fit	99.4763	0	0	0	0.523715	0												F5
No	212.059	9.384	0.084	2	1	4977	5	0.1	1.3069	No warnings	94.5576	5.07838	0	0	0.364035	0												F15
No	212.059	9.336	0.083	1	1	3251.31	5	0	0.431346	No warnings	97.8433	2.15673	0	0	0	0												F13
No	212.059	9.341	0.077	1	1	5591.69	5	0.1	1.62295	Low pattern fit	97.9713	0	0	0	2.02869	0												F6
No	212.059	9.343	0.077	1	1	4121.19	5	0	0	No warnings	100	0	0	0	0	0												F1
No	212.059	6	0.081	5	1	31658.3	12	3.2	26.8379	Contaminating mass	57.8902	0	0	0.674601	0	0	4.12077	3.66843	33.4928	0	0	0.153144	0					F7
No	212.059	6.017	0.067	7	1	18428	12	2.8	23.1252	Contaminating mass	57.6582	0	0	0.955348	0	7.31378	14.1219	6.77814	12.7324	0.406407	0	0.0338445	0					F6
No	212.059	6.012	0.071	5	1	20286.6	12	2.5	20.7101	Irregular exchange	61.8618	0	0	0	6.58656e-05	13.8362	5.05484	5.13962	14.0494	0	0	0.0580106	0					F16
No	212.059	6.018	0.073	4	1	39039	12	5.5	45.8251	Irregular exchange	26.2292	6.42888e-06	0.000119669	0.28193	0	2.71664e-05	14.6888	11.0022	47.2891	0	0	0.508556	0					F13
No	212.059	6.021	0.073	4	1	39405.1	12	5.4	44.9428	Irregular exchange	30.2243	0	0	0	0	3.02206e-05	8.25261	4.41622	56.4305	0	0	0.67633	0					F14
No	212.059	6.023	0.073	4	1	39644.5	12	5.6	46.8693	Irregular exchange	25.1161	0	0	0	0	2.51408e-05	12.9047	12.6124	48.7727	0	0	0.59409	0					F15
No	212.059	5.992	0.08	6	1	15545.7	12	3.4	28.5078	Contaminating mass	53.4855	0	0	0	4.16076e-05	8.81629	4.90234	2.76563	27.0315	0	0	2.99875	0					F1
No	212.059	5.967	0.078	3	1	10117	12	0.7	5.90385	Contaminating mass	88.6281	0	0	0	0	9.97552e-05	8.7567	2.61507	0	0	0	0	0					F8
No	212.059	5.986	0.07	5	1	79500.3	12	6.1	50.8758	Contaminating mass	18.4574	0	0	0	0.000104796	0.000270627	12.8202	20.0216	45.7191	2.55572	0	0.425475	0					F5
No	212.066	5.037	0.058	1	1	1581.5	6	0	0	No warnings	100	0	0	0	0	0	0											F15
No	212.066	5.047	0.072	1	1	2373.45	6	0	0	No warnings	100	0	0	0	0	0	0											F14
No	212.066	5.076	0.043	1	1	1547.92	6	0	0	No warnings	100	0	0	0	0	0	0											F6
No	212.066	5.11	0.061	1	1	1543.51	6	0	0	No warnings	100	0	0	0	0	0	0											F1
No	212.066	5.05	0.065	1	1	1856.46	6	0	0.0336797	No warnings	99.9326	0	0	0.0673594	0	0	0											F8
No	212.066	5.056	0.063	1	1	2308.46	6	0	0	No warnings	100	0	0	0	0	0	0											F5
No	212.066	5.073	0.076	1	1	2639.42	6	0	0	No warnings	100	0	0	0	0	0	0											F7
No	212.066	5.05	0.097	1	1	2357.69	6	0.7	11.5999	Irregular exchange	82.6	0	0	0.000348939	17.3997	0	0											F16
No	212.066	5.051	0.073	1	1	2632.37	6	0	0	No warnings	100	0	0	0	0	0	0											F13
No	212.082	7.247	0.065	2	3	54208.3	8	0.8	9.60432	Irregular exchange	80.8896	8.7248	0.116923	0	0.201637	4.44123	0.0696351	0.00435751	5.55186									F13
No	212.082	7.294	0.106	4	3	107426	8	0.5	5.73079	Contaminating mass	88.5022	3.04222	0	0	0.600281	7.4799	0	0	0.375443									F5
No	212.082	7.201	0.032	2	3	28285.3	8	2.2	27.7004	Irregular exchange	68.7261	1.07721	0	0	1.24607	5.35232	0	0.00604177	23.5922									F16
No	212.082	7.222	0.049	2	3	51300.3	8	2.8	35.5817	Irregular exchange	34.1236	19.5052	0.52482	4.62704e-05	0.316109	33.5692	0	0.700541	11.2606									F15
No	212.082	7.31	0.124	4	3	165680	8	0.3	3.80043	Contaminating mass	92.7365	2.1699	0	0	0.574039	3.40617	0	0.000655104	1.11274									F7
No	212.082	7.283	0.095	3	3	89454.4	8	1	12.593	Contaminating mass	80.4468	0.455523	0	0	1.36429	15.6781	0	0.00125163	2.05405									F6
No	212.082	7.28	0.113	3	3	93751.3	8	0.3	3.25376	Contaminating mass	95.2346	0	0	0	0.00731401	4.02098	4.21127e-07	0.00117537	0.735957									F8
No	212.082	7.253	0.06	3	3	50163.9	8	1.3	15.9793	Irregular exchange	69.3765	10.7478	0	0.0460745	0.266546	13.5402	0	0.00199785	6.02089									F14
No	212.082	7.286	0.062	2	3	17129.7	8	0.8	9.82855	Contaminating mass	79.0021	4.2628	0	0	9.33928	7.38111	0	0.0147048	0									F1
No	212.103	6.947	0.098	3	1	32464.5	7	0.5	6.55767	Contaminating mass	93.0297	0.334956	0	0	0	0.439386	0	6.19597										F8
No	212.103	6.943	0.111	4	1	33347.1	7	0.2	2.98068	Contaminating mass	96.9998	0	0	0	0	0.0684831	0	2.93176										F1
No	212.103	6.931	0.126	2	1	30035	7	0.7	9.44941	Irregular exchange	86.8567	0.0886121	0	0	0	12.661	0.00314669	0.390475										F16
No	212.103	6.949	0.108	3	1	40892.4	7	0.4	5.68916	Contaminating mass	93.8019	0.459454	0	0	0	0.402996	0	5.33566										F5
No	212.103	6.962	0.124	2	1	23350.1	7	0	0.681109	No warnings	99.1573	0	0	0	0	0.565466	0	0.277205										F15
No	212.103	6.947	0.112	3	1	28926	7	0.1	1.59639	No warnings	98.2653	0	0	0	0	0.48394	0	1.25071										F14
No	212.103	6.956	0.104	3	1	35409.9	7	0.3	3.89227	Contaminating mass	96.0092	0	0	0	0	0.344728	0	3.64604										F7
No	212.103	6.958	0.103	4	1	33961.6	7	0.1	1.52417	No warnings	98.228	0.166696	0	0	0	0.367424	0	1.23791										F13
No	212.103	6.953	0.108	3	1	31485.5	7	0.1	1.44734	Contaminating mass	97.7653	0.836018	0	0	0	0.247646	0	1.15102										F6
No	212.103	7.237	0.06	1	1	3292.38	7	0	0.653667	No warnings	99.0849	0	0	0	0	0.915134	0	0										F6
No	212.103	7.236	0.021	2	1	1085.11	7	1	14.8741	Contaminating mass	85.1259	0	0	0	0	3.03445e-05	8.86893e-05	14.874										F5
No	212.103	7.235	0.103	1	1	3414.99	7	0	0.630388	No warnings	99.1175	0	0	0	0	0.882543	0	0										F16
No	212.103	7.108	0.085	1	1	2584.87	7	6.1	87.5305	Low pattern fit	0	0	0	3.24315	0	36.6667	0.980562	59.1096										F14
No	212.103	7.235	0.022	1	1	4082.9	7	0.2	2.22099	Contaminating mass	96.8906	0	0	0	0	3.10939	0	0										F7
No	212.103	7.236	0.029	1	1	3577.7	7	0.1	1.06224	Low pattern fit	98.5129	0	0	0	0	1.48713	0	0										F15
No	212.105	9.763	0.077	5	3	39441.5	11	1.9	17.0216	Irregular exchange	80.2383	0	0	1.4561	0	1.12	5.99815e-05	0	3.83545	0	0.265649	13.0844						F13
No	212.105	9.762	0.064	3	3	34131.7	11	2	18.3601	Irregular exchange	79.901	0	0	0	0	1.2764	4.75209e-05	0.762014	2.7685	2.29174e-06	0.116252	15.1758						F16
No	212.105	9.756	0.07	4	3	93173.5	11	7.4	67.6088	Contaminating mass	31.5381	0	0	0.806158	0	0.211346	3.78642e-06	0.0607798	0.460688	0	0.0408535	66.882						F6
No	212.105	9.757	0.061	4	3	55074	11	5.9	54.0889	Irregular exchange	44.3045	0	0	0	0	1.51583e-07	4.67627e-05	0.125986	5.71327	0	0.0284339	49.8278						F15
No	212.105	9.742	0.077	4	3	60919.6	11	5.8	53.0673	Contaminating mass	44.8474	4.89607e-05	0	0.650465	0	0.591173	3.13913e-05	2.70705	1.11697	0	0.00765273	50.0792						F5
No	212.105	9.738	0.079	5	3	134427	11	8.8	79.6032	Contaminating mass	15.9718	0.298015	0	0.375843	0	5.40074e-07	2.99434e-05	0.397581	1.51166	0	36.5634	44.8817						F8
No	212.105	9.771	0.079	6	3	169021	11	8	72.3765	Contaminating mass	20.5037	0	1.42712	0.34209	0	0.25367	4.76875e-05	1.20055	4.36036	0	43.3315	28.581						F1
No	212.105	9.765	0.075	5	3	107195	11	7.6	69.4158	Contaminating mass	26.6967	0	0	0.205654	0	1.09107e-07	1.22984e-05	0.114351	1.98703	0	34.6984	36.2979						F7
No	212.105	9.763	0.074	3	3	56643.7	11	4.7	42.9547	Irregular exchange	51.7913	0	0	0	0	0	4.42896e-05	0	5.66278	0	40.8054	1.74053						F14
No	212.105	7.603	0.098	5	2	32210.4	11	1.6	14.1514	Contaminating mass	80.9543	0	0	5.49598	0	0	3.47694e-05	0	3.28978	0	0	10.2599						F5
No	212.105	7.775	0.093	5	2	45497.2	11	5.6	50.915	Contaminating mass	39.3149	0	0.0459427	7.54168	0	3.24697e-06	3.87757e-05	0.172883	3.63733	0	35.1205	14.1667						F8
No	212.105	7.587	0.123	5	2	28331.5	11	4.6	42.0718	Irregular exchange	43.0585	0	11.3658	4.40503	0	0	9.17154e-05	0	8.67784	0	0	32.4928						F14
No	212.105	7.545	0.095	2	2	8641.37	11	1.5	13.6587	Irregular exchange	83.0703	0	0	0	0	0	0.00013435	0	11.9569	2.72294e-06	0.108884	4.86373						F15
No	212.105	7.78	0.099	4	2	55009.7	11	7.3	65.9538	Irregular exchange	24.6709	0	2.65765	1.15029	0	0	4.49705e-05	0	4.25509	7.73009e-07	57.2421	10.024						F16
No	212.105	7.554	0.117	4	2	25029.6	11	1.2	11.0683	Irregular exchange	67.0343	0	20.155	4.238	0	0	8.9056e-05	7.76033e-07	8.42622	0.146363	0	0						F13
No	212.105	7.602	0.099	4	2	21387.8	11	1.5	13.9761	Contaminating mass	71.0745	0.000190655	0	20.1162	0	0	2.54933e-05	6.24762e-07	1.02532	0.117832	0.200029	7.46592						F1
No	212.105	7.62	0.122	5	2	30018.1	11	3.2	29.398	Contaminating mass	53.314	0	16.7599	1.70273	0	0	6.43931e-05	0	6.0927	0	7.42877	14.7018						F6
No	212.105	7.596	0.079	5	2	32211.1	11	2.8	25.7861	Contaminating mass	59.7273	0	0	18.7859	0	0	3.19371e-05	0	3.02179	0	0	18.465						F7
No	212.139	10.362	0.081	3	1	32659.5	8	2.5	31.6631	Irregular exchange	40.2368	0.246779	0	0	54.5393	0.0324076	0	4.81875	0.12589									F14
No	212.139	10.365	0.061	3	1	7639.19	8	0.5	6.774	Contaminating mass	90.2253	2.37179	0	0	0	1.02817e-05	0	7.40288	0									F5
No	212.139	10.351	0.078	3	1	12215.6	8	0.4	5.17479	Contaminating mass	92.9906	1.24948	0	0	0	0.0910419	0	5.65764	0.0112751									F1
No	212.139	10.361	0.08	3	1	10180.9	8	0.4	5.01414	Contaminating mass	93.0174	1.44345	0	0.00579049	0	0.0522038	0	5.45808	0.0230856									F6
No	212.139	10.366	0.067	3	1	9255.78	8	1	11.9718	Irregular exchange	84.4368	2.19464	0	0	0	1.85673e-05	0	13.3685	0									F16
No	212.139	10.363	0.079	3	1	22027.4	8	0.3	3.80094	No warnings	93.8923	2.04598	0	0	0	0.0383804	0	4.01741	0.00596447									F15
No	212.139	10.372	0.082	4	1	47187.9	8	3.4	42.7002	Irregular exchange	21.5919	0.602671	0	4.66795e-06	66.9931	1.43084	0	9.17972	0.201808									F13
No	212.139	10.37	0.082	3	1	11501.2	8	1	12.4507	Contaminating mass	85.7466	0	0	0	0	0.083921	0	14.1695	0									F7
No	212.139	10.37	0.08	5	1	16911.3	8	0.9	10.8095	Contaminating mass	83.1452	0	0	8.66869e-06	8.04842	3.68594	0	5.11113	0.00928551									F8
No	212.141	8.801	0.062	2	1	32298	12	8.9	74.1148	Irregular exchange	6.50395e-05	0.189998	0.00573992	26.0837	0	0	0	0	0	8.72947e-05	0	73.7204	0					F14
No	212.141	8.507	0.073	3	1	4479.59	12	4.6	38.5733	Contaminating mass	0.00591434	8.79131	0	68.6427	0	0	0	0	0	2.67141e-05	0	22.56	0					F8
No	212.141	8.528	0.146	3	1	6530.97	12	4.2	34.9637	Contaminating mass	0.00821552	11.8454	0	70.2363	0	0	0	0	0	2.12078e-05	0	17.91	0					F5
No	212.141	8.562	0.036	2	1	3719.55	12	5.3	44.1209	Irregular exchange	0	0.00330894	0.0215444	71.2902	0	0	0	0	0	3.39667e-05	0	28.6849	0					F15
No	212.141	8.472	0.016	3	1	2959.64	12	7.5	62.3037	Contaminating mass	0.0198311	26.2824	0	11.1641	0	0	0	0	0	7.40481e-05	0	62.5336	0					F1
No	212.141	8.436	0.034	3	1	1774.36	12	6.3	52.4118	Contaminating mass	0.0158853	21.3912	0	32.1214	0	0	0	0	0	5.50283e-05	0	46.4714	0					F7
No	212.214	13.612	0.072	1	1	1260.56	14	0	0	No warnings	100	0	0	0	0	0	0	0	0	0	0	0	0	0	0			F7
No	212.214	13.62	0.073	1	1	1306.31	14	0	0	No warnings	100	0	0	0	0	0	0	0	0	0	0	0	0	0	0			F8
No	212.214	13.615	0.071	1	1	1043.84	14	0	0	No warnings	100	0	0	0	0	0	0	0	0	0	0	0	0	0	0			F5
No	212.214	13.616	0.077	1	1	1099.65	14	0	0	No warnings	100	0	0	0	0	0	0	0	0	0	0	0	0	0	0			F13
No	212.214	13.618	0.08	1	1	1011.87	14	0	0	No warnings	100	0	0	0	0	0	0	0	0	0	0	0	0	0	0			F6
No	212.214	13.634	0.079	1	1	1575.89	14	0	0	No warnings	100	0	0	0	0	0	0	0	0	0	0	0	0	0	0			F16
No	212.214	13.621	0.076	1	1	1316.56	14	0	0	No warnings	100	0	0	0	0	0	0	0	0	0	0	0	0	0	0			F1
No	212.972	2.214	0.076	2	4	15842.7	7	1.3	18.6992	Contaminating mass	77.5852	0	0	0.00808214	0.0142558	3.54655	18.841	0.00494581										F5
No	212.972	2.211	0.073	3	4	13344.8	7	1.9	26.8409	Irregular exchange	62.3893	0	2.58945	9.13782	0	0.00700308	25.8764	0										F16
No	212.972	2.196	0.062	5	4	14044.4	7	1.7	24.623	Irregular exchange	38.9125	24.6734	9.55997	9.49249	0	4.07944	13.2822	0										F13
No	212.972	2.209	0.078	5	4	12907.7	7	1.5	21.709	Irregular exchange	56.028	6.0976	6.77075	13.1371	0.199102	14.4922	3.27235	0.00304222										F14
No	212.972	2.21	0.067	3	4	20854.3	7	1.1	15.2516	Contaminating mass	50.6472	34.9138	0	1.49441	0	10.3088	2.63069	0.00518794										F7
No	212.972	2.201	0.063	2	4	32002.1	7	2.8	40.0935	Contaminating mass	37.2804	11.7062	0	9.65834	1.22534	5.70912	34.4176	0.00298313										F8
No	212.972	2.199	0.072	4	4	14781.1	7	1.8	25.0275	Irregular exchange	53.0026	0	13.3053	13.0235	0	14.4999	6.16869	0										F15
No	212.972	2.221	0.073	2	4	47720.4	7	1.4	20.5182	Contaminating mass	58.7978	17.7298	0	0.0168181	0	14.8882	8.56541	0.00198634										F1
No	212.972	2.194	0.094	3	4	29830.2	7	1.8	25.1288	Contaminating mass	53.8462	17.6964	1.19546	2.16957	0	1.27123	23.7989	0.0222652										F6
No	213.022	5.744	0.093	2	1	2604.47	7	0.1	0.715627	No warnings	98.7477	0	0	0	1.25235	0	0	0										F13
No	213.022	5.74	0.089	1	1	2834.41	7	0	0	No warnings	100	0	0	0	0	0	0	0										F5
No	213.022	5.759	0.099	2	1	3619.73	7	0	0.0308067	No warnings	99.9692	0	0	0	0	0	0	0.0308067										F8
No	213.022	5.745	0.097	1	1	3386.99	7	0	0	No warnings	100	0	0	0	0	0	0	0										F7
No	213.022	5.727	0.086	2	1	3221.93	7	0	0	No warnings	100	0	0	0	0	0	0	0										F16
No	213.022	5.735	0.102	1	1	3409.69	7	0	0.00163607	No warnings	99.9984	0	0	0	0	0	0	0.00163607										F14
No	213.022	5.74	0.088	2	1	2850.89	7	0	0	No warnings	100	0	0	0	0	0	0	0										F6
No	213.022	5.738	0.081	1	1	2933.88	7	0	0	No warnings	100	0	0	0	0	0	0	0										F15
No	213.022	5.713	0.09	2	1	2800.37	7	0.1	1.03989	No warnings	97.5736	0	0	2.42641	0	0	0	0										F1
No	213.04	7.613	0.069	1	2	5622.41	6	3	49.2639	Irregular exchange	29.7754	13.8714	0	1.81157e-05	0.0537939	56.2993	0											F16
No	213.04	7.596	0.145	1	2	4819.89	6	2.8	47.1231	Low pattern fit	20.2859	28.9468	0	0	0.0444074	50.7229	0											F15
No	213.04	7.628	0.038	1	2	6205.67	6	2.2	36.5735	Irregular exchange	36.0596	25.05	0	0	0.0612992	38.8291	0											F14
No	213.04	7.24	0.084	2	2	25757.4	6	3.1	51.8905	Contaminating mass	35.0251	3.37859	0	2.83694e-06	0.0175485	61.5788	0											F5
No	213.04	7.469	0.111	1	2	7536.53	6	4.9	81.8884	Contaminating mass	0	0.0997406	0	3.99801	0.274521	95.6277	0											F1
No	213.04	7.492	0.11	1	2	5419.48	6	3.1	51.5036	Contaminating mass	34.0264	5.18973	0	0	0.0873777	60.6965	0											F6
No	213.04	7.481	0.071	2	2	11610.3	6	1.4	24.0343	Contaminating mass	64.9521	7.7547	0	0	0.0148516	27.2783	0											F8
No	213.04	7.502	0.083	1	2	5890.37	6	3.8	62.9239	Contaminating mass	22.627	0	0	4.59151	0.138596	72.6429	0											F7
No	213.04	7.602	0.045	1	2	5196.18	6	0.5	8.96944	Low pattern fit	86.0205	0	0	9.76046	0.152246	0.474596	3.59221											F13
No	213.043	10.163	0.024	5	1	20838.7	12	4.9	40.5118	Irregular exchange	38.8686	3.9474	0	0	0	1.33431	4.25048e-08	8.50022	21.8333	19.6613	0	5.85479	0					F16
No	213.043	10.154	0.023	3	1	5431.88	12	3.7	30.9184	Contaminating mass	24.6146	18.5578	0	0.00108608	0	24.7895	0	27.7836	4.25344	0	0	0	0					F7
No	213.043	10.179	0.04	5	1	6119.2	12	5.4	45.0481	Contaminating mass	16.4284	4.49798	0	0	0	15.521	0	49.9469	13.6057	0	0	0	0					F6
No	213.043	10.074	0.073	4	1	18339.1	12	5	41.6913	Irregular exchange	38.3799	6.06526	0	0	0	5.01333	1.01354e-07	1.582	3.07919	35.6137	0	10.2666	0					F13
No	213.043	10.115	0.046	5	1	8244.07	12	5.1	42.7057	Contaminating mass	23.7362	0	0	0.000784837	0	17.9129	0	47.6163	7.25944	3.35338	0	0.121018	0					F5
No	213.043	10.134	0.064	5	1	10683.2	12	5.3	44.2756	Contaminating mass	19.0622	9.09015	0	0	0	6.65836e-07	4.99796e-05	54.8511	14.9536	1.92085	0	0.121994	0					F1
No	213.043	10.058	0.08	3	1	6797.06	12	1.5	12.4573	Irregular exchange	67.3875	9.16489	0	0.000156365	0	16.1236	9.42271e-05	0	6.95253	0	0	0.371271	0					F15
No	213.043	10.196	0.044	4	1	4040.77	12	3.7	30.7597	Contaminating mass	33.6986	15.7655	0	0	0	16.9788	0	0	33.5571	0	0	0	0					F8
No	213.043	10.165	0.022	5	1	4192.36	12	4	32.9257	Low pattern fit	27.8321	11.2491	0	0	0	24.5917	0	29.716	6.61121	0	0	0	0					F14
No	213.05	2.11	0.066	1	1	28297.8	6	6	100	Contaminating mass	0	0	0	0	0	0	100											F1
No	213.05	2.163	0.118	2	1	38228.6	6	1.5	24.3646	Low pattern fit	30.3007	0	68.002	0	0	0	1.69725											F13
No	213.05	2.211	0.119	3	1	45990.3	6	1.9	32.2256	Low pattern fit	14.6978	0	78.3834	0	0	4.92608	1.99276											F15
No	213.05	2.158	0.075	1	1	34290.9	6	0.7	11.0022	Contaminating mass	88.0189	0	0	1.95779	0	0	10.0233											F5
No	213.05	2.151	0.083	3	1	30085.4	6	1.8	30.2277	Low pattern fit	12.853	0.394062	84.8864	0	0	0	1.86653											F14
No	213.05	2.174	0.131	2	1	54062.3	6	0.2	3.45626	Contaminating mass	96.5437	0	0	0	0	0	3.45626											F7
No	213.05	2.153	0.08	2	1	22689.7	6	1.8	29.6841	Low pattern fit	15.1963	0	82.6793	0	0	0	2.12433											F16
No	213.05	2.167	0.09	1	1	43860.6	6	0.7	10.9287	Contaminating mass	89.0713	0	0	0	0	0	10.9287											F6
No	213.05	2.14	0.099	3	1	42326.5	6	0.8	12.7523	Contaminating mass	70.1094	0	24.2437	0	2.92749	0	2.71938											F8
No	213.054	5.846	0.11	5	1	11545.1	11	3.4	31.2565	Contaminating mass	45.0754	0	0	0	0.000276531	29.2763	0.647476	6.97041	17.8565	0	0	0.17358						F6
No	213.054	5.864	0.075	5	1	11918.4	11	3.4	31.2754	Irregular exchange	47.026	0	0	0	0.00020656	21.9193	0.877618	12.7073	17.3166	0	0	0.153007						F14
No	213.054	5.837	0.084	5	1	16142.2	11	3.8	34.3819	Contaminating mass	40.0586	0	4.72141	0	0	22.1838	0	7.11934	25.6938	0	0	0.22301						F7
No	213.054	5.858	0.071	2	1	10309.4	11	1	9.23861	Contaminating mass	80.4665	0	0	0.000393724	0.000455874	18.8729	0	0	0	0	0	0.65974						F5
No	213.054	5.87	0.075	5	1	12767.3	11	3.4	31.3622	Low pattern fit	45.067	0	0	4.84535	0	18.7162	0	14.8602	16.2593	0	0	0.252032						F15
No	213.054	5.86	0.072	4	1	11563.6	11	3.5	32.0024	Low pattern fit	45.9422	0	0	0.000485229	0.000522105	23.2207	0	11.5406	19.0384	0	0	0.257142						F13
No	213.054	5.852	0.069	4	1	9802.21	11	2.8	25.6582	Irregular exchange	59.0343	0	0	0.0002585	0.000277699	12.3701	0	9.04479	19.3261	0	0	0.224169						F16
No	213.054	5.841	0.07	6	1	15518	11	3.5	31.9118	Contaminating mass	38.5345	0	0	5.47771	0	35.6113	0.229021	6.94406	12.8929	0	0	0.31044						F8
No	213.054	5.834	0.119	5	1	10633.5	11	3.1	28.3756	Contaminating mass	49.7591	0	0	0	0.00021232	22.5173	4.71876	13.525	9.23985	0	0	0.239819						F1
No	213.064	2.164	0.09	2	1	92071.2	10	1.3	13.3283	Contaminating mass	71.4734	0	0	3.1185	6.51627	15.517	3.35445	0.014856	0.00372257	0	0.00172662							F6
No	213.064	2.178	0.078	2	1	66802.3	10	1.3	13.2751	Low pattern fit	70.7928	0	0	6.83002	4.16513	14.729	2.44817	1.02755	0	0	0.00732864							F16
No	213.064	2.052	0.048	2	1	172142	10	2.6	25.5064	Low pattern fit	50.8171	1.5336	0	5.45294	3.62748	14.169	19.4279	4.6907	0.144062	0.110587	0.0267324							F13
No	213.064	2.152	0.098	2	1	121786	10	2.1	21.1402	Contaminating mass	53.3105	0	0	3.31976	18.1712	22.8325	2.18693	0.100931	0.00681825	0	0.0713214							F8
No	213.064	2.155	0.086	2	1	140176	10	2.1	20.5656	Contaminating mass	53.1535	0	0	6.7475	18.2446	18.7965	2.96974	0.076962	0.00803917	0	0.00314908							F7
No	213.064	2.167	0.118	2	1	131625	10	2.5	24.6153	Low pattern fit	44.1358	4.54225	0	13.1111	6.97534	18.5866	7.67256	4.67187	0.0442224	0.251597	0.00867335							F15
No	213.064	2.162	0.083	2	1	105505	10	1.8	17.78	Low pattern fit	64.576	0	0	5.42502	5.39911	13.6022	5.36867	5.47232	0.0125879	0.142596	0.00149582							F14
No	213.064	2.148	0.066	2	1	62248.5	10	1.2	12.3597	Contaminating mass	74.1013	0	0	3.45383	1.50302	18.5586	2.34907	0	0.00276897	0	0.0314119							F1
No	213.064	2.17	0.104	2	1	223836	10	1.4	14.2303	Contaminating mass	68.8083	0.152274	0	2.538	11.9681	12.9645	3.42932	0.0433059	0	0	0.0962536							F5
No	213.082	11.21	0.034	1	1	1236.61	4	4	99.9645	Contaminating mass	0	0	0	0.141859	99.8581													F8
No	213.082	11.144	0.017	1	1	2279.75	4	3.9	98.1948	Low pattern fit	1.64116	0	0	0.655996	97.7028													F13
No	213.082	11.187	0.072	1	1	3169.35	4	4	99.7845	Low pattern fit	0	0	0	0.86204	99.138													F16
No	213.082	11.406	0.027	1	1	1241.12	4	0.9	23.632	Contaminating mass	73.9197	0	0	9.79336	16.287													F6
No	213.082	11.321	0.035	2	1	3622.74	4	0.7	17.1647	Contaminating mass	82.8353	0	0	0	17.1647													F5
No	213.082	11.29	0.073	2	1	7132.49	4	0.4	8.94556	Contaminating mass	91.0526	0	0	0.00725828	8.94011													F1
No	213.1	6.96	0.031	4	1	3844.71	11	4.3	39.4099	Irregular exchange	0	6.00334e-05	2.64192	29.4581	0	67.7829	0	0	0.117008	0	0	0						F16
No	213.1	6.997	0.011	2	1	1445.94	11	3.4	30.5695	Contaminating mass	0.0205451	29.5514	0	57.1316	0	0	0	0	3.6477	0	0	9.64875						F8
No	213.1	6.989	0.026	2	1	1033.95	11	8.7	79.5425	Contaminating mass	0	0	0	0	0	0	0	0	75.011	0	0	24.989						F5
No	213.137	9.741	0.082	4	1	3841.37	11	1.6	14.1095	Contaminating mass	73.6971	0	9.20306	0	0	0	0.000133543	0	17.0997	0	0	0						F5
No	213.137	9.738	0.046	1	1	2021.06	11	0.3	2.60242	Low pattern fit	97.1373	0	0	0	0	0	0	0	0	0	2.86266	0						F15
No	213.137	9.756	0.087	3	1	6041.32	11	0.6	5.53733	Contaminating mass	82.8629	0	12.6976	0	0	0	3.46701e-05	0	4.43939	0	0	0						F1
No	213.137	9.691	0.057	2	1	2876.86	11	4	36.2523	Low pattern fit	50.5764	0	0	0	0	0	0.000443879	0	47.7294	0	1.69368	0						F16
No	213.137	5.434	0.026	2	1	1326.83	11	0.6	5.07776	Contaminating mass	78.3384	0.00277384	9.12381	12.535	0	0	0	0	0	0	0	0						F6
No	213.137	5.487	0.04	1	1	1729.53	11	0	0	No warnings	100	0	0	0	0	0	0	0	0	0	0	0						F15
No	213.137	5.56	0.312	3	1	4801.15	11	1.2	10.573	Contaminating mass	83.6309	0	2.4416	0	0	0	0.000108768	0	13.9274	0	0	0						F7
No	213.137	5.524	0.134	3	1	3586.49	11	3.7	33.6905	Contaminating mass	49.6493	0	5.36818	0	0	0	0.000351295	0	44.9821	0	0	0						F5
No	213.137	5.559	0.108	2	1	1454.21	11	3.8	34.9779	Contaminating mass	0.00320414	0.0210317	69.1783	0	0	0	0.000240515	0	30.7972	0	0	0						F1
No	213.137	5.283	0.032	3	1	6876.63	11	3.2	28.9431	Irregular exchange	28.7311	0.00166572	0.00412002	50.348	0	0	0.000163338	0	20.9149	0	0	0						F13
No	213.173	10.328	0.131	3	2	76785.4	12	0.2	1.35129	Contaminating mass	96.1586	0.0123523	0	0.000808781	3.36214	0.381719	0	0	2.09331e-07	0	0.0843591	0	0					F5
No	213.173	10.333	0.127	3	2	23838.3	12	1	8.42015	Irregular exchange	84.3545	2.07902	0	0.00010949	2.93803	3.8132	0	0	0.00349997	0	6.81164	0	0					F15
No	213.173	10.491	0.131	4	2	141143	12	2	16.5334	Contaminating mass	48.2497	0.491818	0	32.5898	3.79824	12.7475	0	0.00677316	1.73877e-06	0	2.1162	0	0					F1
No	213.173	10.324	0.125	3	2	49838.6	12	0.1	1.14694	Contaminating mass	95.4831	1.51969	0	7.31133e-06	2.74259	0.25463	0	0	0	0	0	0	0					F7
No	213.173	10.339	0.118	2	2	30230.8	12	0	0.330631	No warnings	98.8763	0.412696	0	2.04128e-05	6.3754e-05	0.710912	0	0	0	0	0	0	0					F6
No	213.173	10.327	0.127	3	2	40299.7	12	0.8	6.61911	Irregular exchange	84.4979	2.70479	0	3.33106e-05	7.57462	1.1601	0	0	1.00809e-05	0	4.06254	0	0					F13
No	213.173	10.331	0.128	3	2	48076.7	12	0.1	0.455631	No warnings	97.7314	1.35075	0	1.27915e-05	0.472335	0.445489	0	0	0	0	0	0	0					F16
No	213.173	10.346	0.126	3	2	29966	12	0.9	7.50498	Irregular exchange	78.6804	2.87173	0	6.49853e-06	16.0264	0.226323	0	0	5.4469e-06	0	2.19507	0	0					F14
No	213.173	10.319	0.127	3	2	60366	12	0.1	0.952059	Contaminating mass	96.8229	0.590679	0	1.40184e-05	2.09823	0.488216	0	0	0	0	0	0	0					F8
No	213.173	6.545	0.034	3	1	30024.1	12	2.8	23.2011	Irregular exchange	11.8585	0	0.000419871	74.1515	13.9896	0	0	0	0	0	0	0	0					F15
No	213.173	6.523	0.06	3	1	17034.6	12	2.1	17.3464	Contaminating mass	47.9572	0	0	0.0137607	52.029	0	0	0	0	0	0	0	0					F6
No	213.173	6.858	0.552	3	1	197632	12	2.7	22.1252	Contaminating mass	12.7378	0	0	83.6707	3.56038	0	2.88737e-07	0	0.0311753	0	0	0	0					F7
No	213.173	6.521	0.057	3	1	19673.1	12	1.3	11.2408	Irregular exchange	66.2755	0	0	0.00891711	33.7156	0	0	0	0	0	0	0	0					F13
No	213.173	6.505	0.075	3	1	29151.7	12	1	8.49614	Contaminating mass	74.5099	0	0	0.00673985	25.4834	0	0	0	0	0	0	0	0					F5
No	213.173	6.505	0.076	4	1	52940	12	2	16.9849	Irregular exchange	31.8652	0.292796	0	67.842	0	0	0	0	0	0	0	0	0					F16
No	213.173	6.507	0.07	2	1	14849.7	12	0	0.0437736	No warnings	99.4747	0.525284	0	0	0	0	0	0	0	0	0	0	0					F1
No	213.173	6.514	0.06	3	1	59743.2	12	1.6	13.6229	Contaminating mass	45.5086	0	0	54.4914	0	0	0	0	0	0	0	0	0					F8
No	213.173	6.511	0.064	3	1	15613	12	0.6	4.8364	Irregular exchange	85.4896	0	0	0.00477438	14.5056	0	0	0	0	0	0	0	0					F14
No	213.173	9.899	0.065	3	2	116279	12	2.7	22.5646	Irregular exchange	12.4693	0.262229	0	82.9148	0	4.35373	0	0	0	0	0	0	0					F16
No	213.173	9.512	1.888	3	2	508047	12	3	24.7482	No warnings	1.18506	0.0814663	0.0246009	98.1513	0.393916	0.163525	0	0	0.000135232	0	0	0	0					F15
No	213.173	9.822	0.069	3	2	17742	12	2	16.4228	Irregular exchange	54.8624	2.23193	0	0	19.7218	23.1722	0	0	0.0116615	0	0	0	0					F13
No	213.173	9.459	0.083	3	2	46372.1	12	3	25.2636	Contaminating mass	37.2444	0.0476731	0	0.00713749	27.2432	32.0821	0	0	0.0224939	0	3.3531	0	0					F6
No	213.173	9.588	1.534	3	2	273156	12	2.9	24.0759	Contaminating mass	5.21556	0.376302	0	90.7129	2.08824	1.60419	0	0	0.00276059	0	0	0	0					F5
No	213.173	9.694	1.405	3	2	238905	12	2.9	24.223	No warnings	4.41774	0.161285	0	93.2964	0	2.12356	0	0.00106222	0	0	0	0	0					F14
No	213.173	9.458	0.07	4	2	51242.2	12	3.9	32.4559	Contaminating mass	25.8742	2.49925	0	1.39997e-05	8.79895e-05	65.8587	0	0	4.78932e-06	0	5.76778	0	0					F1
No	213.173	9.416	1.923	3	2	335491	12	2.8	23.5181	Contaminating mass	6.735	0.194245	0.0282969	91.0528	1.14506	0.843079	0	0	0.00150394	0	0	0	0					F8
No	213.173	9.646	1.168	4	2	316688	12	2.9	24.2267	Contaminating mass	4.29655	0.111946	0	93.1931	0.962675	1.43568	0	0	0	0	0	0	0					F7
No	213.184	7.904	0.068	1	1	2036.77	11	0	0	No warnings	100	0	0	0	0	0	0	0	0	0	0	0						F5
No	213.184	7.901	0.067	1	1	1750.05	11	0	0	No warnings	100	0	0	0	0	0	0	0	0	0	0	0						F6
No	213.184	7.907	0.063	2	1	8958.27	11	0	0	No warnings	100	0	0	0	0	0	0	0	0	0	0	0						F1
No	213.184	7.901	0.06	1	1	1813.31	11	0	0	No warnings	100	0	0	0	0	0	0	0	0	0	0	0						F7
No	213.184	7.9	0.075	2	1	4118.94	11	0	0	No warnings	100	0	0	0	0	0	0	0	0	0	0	0						F8
No	213.184	7.899	0.074	1	1	1224.83	11	0	0	No warnings	100	0	0	0	0	0	0	0	0	0	0	0						F14
No	213.184	7.906	0.061	1	1	1875.71	11	0	0	No warnings	100	0	0	0	0	0	0	0	0	0	0	0						F13
No	213.184	7.905	0.058	2	1	3842.94	11	0	0	No warnings	100	0	0	0	0	0	0	0	0	0	0	0						F16
No	213.209	14.64	0.079	1	1	2679.9	13	0	0	No warnings	100	0	0	0	0	0	0	0	0	0	0	0	0	0				F8
No	213.209	14.64	0.127	1	1	1751.8	13	0	0	No warnings	100	0	0	0	0	0	0	0	0	0	0	0	0	0				F15
No	213.209	14.643	0.087	1	1	2596.7	13	0	0	No warnings	100	0	0	0	0	0	0	0	0	0	0	0	0	0				F16
No	213.209	14.639	0.086	1	1	2570.72	13	0	0	No warnings	100	0	0	0	0	0	0	0	0	0	0	0	0	0				F5
No	213.209	14.64	0.094	1	1	2164.43	13	0	0	No warnings	100	0	0	0	0	0	0	0	0	0	0	0	0	0				F6
No	213.209	14.64	0.087	1	1	1623.59	13	0	0	No warnings	100	0	0	0	0	0	0	0	0	0	0	0	0	0				F14
No	213.209	14.643	0.1	1	1	1671.3	13	0	0	No warnings	100	0	0	0	0	0	0	0	0	0	0	0	0	0				F13
No	213.209	8.348	0.084	1	1	3353.48	13	0	0	No warnings	100	0	0	0	0	0	0	0	0	0	0	0	0	0				F14
No	213.209	8.369	0.083	1	1	2500.97	13	0	0	No warnings	100	0	0	0	0	0	0	0	0	0	0	0	0	0				F6
No	213.209	8.374	0.071	1	1	2248.48	13	0	0	No warnings	100	0	0	0	0	0	0	0	0	0	0	0	0	0				F5
No	213.209	8.374	0.076	1	1	2366.46	13	0	0	No warnings	100	0	0	0	0	0	0	0	0	0	0	0	0	0				F8
No	213.209	8.341	0.082	1	1	2692.66	13	0	0	No warnings	100	0	0	0	0	0	0	0	0	0	0	0	0	0				F13
No	213.209	8.367	0.069	1	1	2093.36	13	0	0	No warnings	100	0	0	0	0	0	0	0	0	0	0	0	0	0				F16
No	213.209	8.368	0.097	1	1	2408.81	13	0	0	No warnings	100	0	0	0	0	0	0	0	0	0	0	0	0	0				F15
No	213.209	8.337	0.071	1	1	4983.19	13	0	0	No warnings	100	0	0	0	0	0	0	0	0	0	0	0	0	0				F7
No	213.209	8.526	0.067	2	1	2071.99	13	0	0	No warnings	100	0	0	0	0	0	0	0	0	0	0	0	0	0				F6
No	213.209	8.524	0.073	1	1	1453.08	13	0	0	No warnings	100	0	0	0	0	0	0	0	0	0	0	0	0	0				F15
No	213.209	8.521	0.076	1	1	2066.11	13	0	0	No warnings	100	0	0	0	0	0	0	0	0	0	0	0	0	0				F5
No	213.209	8.519	0.079	1	1	2185.15	13	0	0	No warnings	100	0	0	0	0	0	0	0	0	0	0	0	0	0				F7
No	213.209	8.522	0.063	1	1	1994.33	13	0	0	No warnings	100	0	0	0	0	0	0	0	0	0	0	0	0	0				F14
No	213.209	8.52	0.062	1	1	1572.39	13	0	0	No warnings	100	0	0	0	0	0	0	0	0	0	0	0	0	0				F13
No	213.209	8.523	0.072	1	1	1839.49	13	0	0	No warnings	100	0	0	0	0	0	0	0	0	0	0	0	0	0				F8
No	213.209	8.561	0.072	1	1	2687.87	13	0	0	No warnings	100	0	0	0	0	0	0	0	0	0	0	0	0	0				F16
No	213.209	8.521	0.082	1	1	1072.58	13	0	0	No warnings	100	0	0	0	0	0	0	0	0	0	0	0	0	0				F1
No	213.246	10.581	0.095	3	1	40071.2	14	0	0	No warnings	100	0	0	0	0	0	0	0	0	0	0	0	0	0	0			F15
No	213.246	10.577	0.097	2	1	65847	14	0	0	No warnings	100	0	0	0	0	0	0	0	0	0	0	0	0	0	0			F16
No	213.246	10.584	0.096	2	1	58558.5	14	0	0.0522131	No warnings	99.269	0.730983	0	0	0	0	0	0	0	0	0	0	0	0	0			F5
No	213.246	10.583	0.095	2	1	44824.1	14	0	0.0232667	No warnings	99.6743	0.325734	0	0	0	0	0	0	0	0	0	0	0	0	0			F8
No	213.246	10.585	0.099	2	1	53218.3	14	0	0.014383	No warnings	99.7986	0.201362	0	0	0	0	0	0	0	0	0	0	0	0	0			F14
No	213.246	10.578	0.092	3	1	178039	14	0	0	No warnings	100	0	0	0	0	0	0	0	0	0	0	0	0	0	0			F1
No	213.246	10.583	0.1	2	1	53139.6	14	0	0	No warnings	100	0	0	0	0	0	0	0	0	0	0	0	0	0	0			F7
No	213.246	10.578	0.096	2	1	39027.7	14	0	0	No warnings	100	0	0	0	0	0	0	0	0	0	0	0	0	0	0			F13
No	213.246	10.583	0.096	2	1	69812.1	14	0	0.0701305	No warnings	99.0182	0.981828	0	0	0	0	0	0	0	0	0	0	0	0	0			F6
No	214.045	5.437	0.046	3	1	15223	8	4.7	58.7908	Low pattern fit	29.3643	0	0	0.000754201	10.6142	0	9.8416e-06	52.2982	7.72242									F16
No	214.045	5.451	0.09	2	1	34707.8	8	6.1	76.2326	Contaminating mass	13.4594	4.88554e-06	3.45024e-05	0.413508	5.22969	0	1.14075e-06	59.4774	21.42									F8
No	214.045	5.455	0.09	4	1	46128.3	8	6.7	83.3325	Contaminating mass	6.1598	0	0	0.000390277	4.80949	0	0	64.8215	24.2088									F7
No	214.045	5.443	0.096	3	1	48100	8	6.3	78.2058	Contaminating mass	5.74053	0	0	0.00124467	18.7421	0	0	53.4547	22.0614									F5
No	214.045	5.446	0.077	3	1	21457	8	6.4	79.6939	Low pattern fit	2.67422	0	0	0.00110095	16.9952	0	0	73.0686	7.26086									F13
No	214.045	5.453	0.081	3	1	24749.1	8	5.8	72.6084	Low pattern fit	17.0073	0	0	0.000107131	1.3202	0	0	77.7932	3.87927									F14
No	214.045	5.435	0.076	2	1	37682.8	8	5.3	65.7156	Low pattern fit	24.4497	0	7.49448e-05	0.000750802	11.6829	0	3.37067e-06	31.9418	31.9249									F15
No	214.045	5.448	0.083	3	1	16106.2	8	6.4	80.4543	Contaminating mass	7.07521	0	0	0.000280289	4.27785	0	0	82.6508	5.99586									F1
No	214.045	5.439	0.092	5	1	62512.2	8	4.1	51.0071	Contaminating mass	37.128	0	0	0.00085648	14.6263	0	0	36.4096	11.8352									F6
No	214.045	10.283	0.059	2	1	3438.6	8	2.4	29.8385	Low pattern fit	43.5921	0	0	0.00683659	43.5548	12.6096	0.23667	0	0									F13
No	214.045	10.048	0.028	3	1	6629.86	8	4.3	53.4372	Low pattern fit	18.1201	0	2.59672e-05	0.00230129	47.2021	1.95642	0.132692	32.5863	0									F14
No	214.045	10.005	0.214	2	1	18724.2	8	2.4	30.3184	Contaminating mass	57.7333	0	0	0.000933596	23.0521	1.09529	0.0439947	0.000182123	18.0743									F8
No	214.045	10.272	0.071	3	1	1919.01	8	3	37.4532	Contaminating mass	50.2651	0	0	0.00102257	16.1716	0	8.51213e-05	33.5622	0									F5
No	214.045	10.228	0.036	3	1	17083.3	8	3	37.1488	Contaminating mass	55.6257	0	0	0.000566604	8.96068	0	0.0255708	21.9073	13.4802									F1
No	214.045	9.998	0.027	3	1	4924.52	8	5.5	69.2772	Contaminating mass	5.94087	0	0.000233505	0.00367654	31.9378	4.70136	9.96982e-05	56.3801	1.0359									F6
No	214.045	10.205	0.12	2	1	7033.73	8	1.3	16.0246	Low pattern fit	77.4105	0	0	0.000859267	12.169	1.07702	0.303786	9.51519e-05	9.03875									F15
No	214.045	9.789	0.016	3	1	23867.9	8	3.3	41.2014	Contaminating mass	48.6154	0	6.407e-05	0.00162221	18.9773	0.80496	3.81228e-06	3.13295	28.4677									F7
No	214.045	10.283	0.038	1	1	1612.64	8	3.4	42.3737	Low pattern fit	16.6459	0	0.000134161	0.00700891	78.078	4.95778	0.311202	0	0									F16
No	214.046	2.942	0.075	2	1	55684.1	6	0.8	12.7553	Irregular exchange	73.1133	2.30766	0	24.1458	0.388301	0.0364371	0.00854024											F14
No	214.046	2.953	0.085	2	1	26394.5	6	1.1	18.5219	Irregular exchange	60.0117	4.88829	0	34.2556	0.770164	0.049993	0.0242981											F15
No	214.046	3.076	0.086	2	1	32834	6	4.2	70.0689	Contaminating mass	29.0541	0.120266	0	1.55054	0	0.00911074	69.266											F1
No	214.046	2.941	0.084	2	1	20655.2	6	1.6	27.143	Irregular exchange	47.0951	13.8117	0	7.34355	31.7327	0.0169213	0											F13
No	214.046	2.936	0.079	3	1	17146.3	6	0.2	3.74159	Contaminating mass	91.8222	1.30231	0	6.35858	0.51501	0	0.00190578											F6
No	214.046	2.998	0.073	3	1	66601.2	6	0.6	9.18017	Contaminating mass	81.1759	0.920415	0	17.454	0.449638	0	0											F8
No	214.046	2.96	0.077	1	1	34068.4	6	3.2	53.8354	Contaminating mass	42.7609	0.890408	0	5.31412	0	0.0276481	51.0069											F5
No	214.046	2.935	0.077	2	1	57432.8	6	0.6	9.8718	Irregular exchange	79.5501	1.82605	0	17.1383	1.44432	0.0344883	0.00667476											F16
No	214.046	2.96	0.016	2	1	25048.4	6	1.8	30.1134	Contaminating mass	63.6408	1.5391	0	9.83967	0.104543	0.0515001	24.8244											F7
No	214.059	2.832	0.189	1	1	12825.6	8	0	0.021587	No warnings	99.8273	0.172696	0	0	0	0	0	0	0									F1
No	214.059	2.71	0.195	2	1	24699.5	8	0.1	0.648118	No warnings	98.963	0	0	1.48183e-05	0	1.03698	0	0	0									F16
No	214.059	2.69	0.176	3	1	21536.1	8	0.1	0.914824	No warnings	98.5363	0	0	2.09161e-05	0	1.46371	0	0	0									F13
No	214.059	2.694	0.148	3	1	28661.1	8	0.1	1.81334	No warnings	96.8794	0.274031	0	0	0	2.84654	0	0	0									F15
No	214.059	2.704	0.183	2	1	16583.3	8	0	0.0620661	No warnings	99.8345	0	0	0.16551	0	0	0	0	0									F5
No	214.059	2.717	0.129	1	1	18564.2	8	0	0	No warnings	100	0	0	0	0	0	0	0	0									F8
No	214.059	2.71	0.175	1	1	25570.5	8	0	0	No warnings	100	0	0	0	0	0	0	0	0									F7
No	214.059	2.702	0.167	2	1	28392.5	8	0	0	No warnings	100	0	0	0	0	0	0	0	0									F14
No	214.059	2.72	0.151	2	1	19707.5	8	0	0.465586	No warnings	99.2551	0	0	1.06449e-05	0	0.744931	0	0	0									F6
No	214.074	6.532	0.071	4	1	36916.7	12	0.3	2.28706	No warnings	96.1293	0	0	0	3.92417e-05	2.70458e-05	1.83614	0	1.96304	0.0312363	0	0.0401963	0					F15
No	214.074	6.501	0.068	6	1	62231.8	12	1.9	15.8117	Contaminating mass	71.9542	0	0	0	0.000343362	1.64004	15.5851	0	9.83426	0.536267	0.419958	0.0298229	0					F5
No	214.074	6.511	0.077	5	1	78153.6	12	1.9	15.7316	Contaminating mass	71.2323	1.53539	0	0	0.000341571	0.000248733	15.9947	0	10.4843	0.365475	0.150039	0.237145	0					F8
No	214.074	6.522	0.064	5	1	38909.8	12	0.5	3.95533	Contaminating mass	93.767	0	0	2.36335e-05	0.000133129	1.08012	0	0	4.34849	0.786077	0	0.0181969	0					F7
No	214.074	6.539	0.073	6	1	44021.2	12	0.6	5.1077	Low pattern fit	90.2814	1.39003	0	0	5.73457e-05	0.93077	2.40405	0	4.58656	0.0666446	0.213825	0.126676	0					F13
No	214.074	6.528	0.063	5	1	38333.3	12	0.4	3.70755	Contaminating mass	92.9582	0	0	0	0.000110981	0.705268	4.98397	0	1.14523	0.187241	0.00627676	0.0136535	0					F1
No	214.074	6.519	0.07	5	1	55279.6	12	1	8.58921	Contaminating mass	83.2187	0	0	0.627441	0	0	14.2882	0	1.39623	0.435477	0.00359299	0.0303437	0					F6
No	214.074	6.524	0.071	3	1	32239.4	12	0.2	1.86122	No warnings	96.3546	0	0	0	7.53193e-05	0	3.49685	0	0	0.140204	0	0.00831374	0					F16
No	214.074	6.534	0.066	5	1	59577.4	12	0.5	3.84917	Low pattern fit	93.1636	0	0	0	3.10041e-05	2.579	0.676338	0	3.20692	0.266605	0	0.107458	0					F14
No	214.074	7.337	0.06	3	2	22261.9	4	0.1	2.35482	No warnings	94.0178	4.26359	0	1.71857	0													F15
No	214.074	7.339	0.06	2	2	17689.8	4	0	1.0836	No warnings	95.7665	4.18304	0	0.0504566	0													F16
No	214.074	7.353	0.059	2	2	15239.4	4	0	0.961667	No warnings	98.6316	0.1292	0	1.23916	0													F1
No	214.074	7.358	0.071	1	2	16380.4	4	0	0.0632597	No warnings	99.9157	0	0	0.0843463	0													F5
No	214.074	7.352	0.065	3	2	21587.1	4	0	1.17886	No warnings	98.4282	0	0	1.57181	0													F6
No	214.074	7.343	0.058	2	2	16950.7	4	0.1	2.37674	No warnings	96.831	0	0	3.16898	0													F8
No	214.074	7.342	0.063	3	2	16503.7	4	0.1	1.61742	No warnings	97.8434	0	0	2.15656	0													F7
No	214.074	7.335	0.067	3	2	19740.5	4	0.1	2.94036	No warnings	91.8652	6.32149	0	1.81331	0													F14
No	214.074	7.34	0.066	3	2	16277.6	4	0.1	3.44558	No warnings	90.5219	7.32597	0	2.15211	0													F13
No	214.074	2.581	0.069	3	2	20719.9	4	2.3	57.1879	Contaminating mass	20.954	4.19318	0	74.8529	0													F8
No	214.074	2.555	0.121	3	2	27403	4	0.7	17.4805	Contaminating mass	72.8359	5.78522	0	21.3789	0													F7
No	214.074	2.579	0.084	3	2	9459.56	4	0.3	8.64224	Irregular exchange	83.1216	8.03316	0	8.84526	0													F13
No	214.074	2.708	0.072	3	2	6456.33	4	1.1	28.5244	Contaminating mass	39.4119	33.8332	0	26.7548	0													F1
No	214.074	2.558	0.076	3	2	31650.8	4	1.1	27.6646	Contaminating mass	58.3798	7.1011	0	34.5191	0													F6
No	214.074	2.537	0.079	3	2	20541.8	4	1.1	26.9584	Contaminating mass	54.6183	14.1558	0	31.2259	0													F5
No	214.074	2.561	0.112	3	2	11099.8	4	0.6	15.652	Irregular exchange	76.5538	3.86747	0	19.5742	0.00453371													F15
No	214.074	2.505	0.087	2	2	20447.6	4	0.9	22.726	Irregular exchange	69.6392	0.0892417	0	30.2715	0													F16
No	214.074	2.55	0.075	3	2	14480.6	4	0.7	17.5374	Irregular exchange	69.824	10.1892	0	19.9868	0													F14
No	214.084	5.86	0.109	1	2	19678	4	0.1	2.59282	No warnings	94.4323	0.832024	4.70175	0	0.0339353													F16
No	214.084	6.059	0.022	1	2	9370.46	4	0	0	Low pattern fit	100	0	0	0	0													F8
No	214.084	5.939	0.053	1	2	8664.36	4	0	0	No warnings	100	0	0	0	0													F6
No	214.084	6.002	0.3	1	1	4827.34	4	1.9	47.4386	Low pattern fit	5.12273	0	94.8773	0	0													F13
No	214.084	5.873	0.113	1	2	7724.76	4	0	0.0267153	No warnings	99.9733	0	0	0	0.0267153													F14
No	214.084	5.884	0.055	1	2	7541.83	4	0.1	1.30017	No warnings	98.6998	0	0	0	1.30017													F1
No	214.084	5.892	0.064	2	2	16060.9	4	0	0.310014	No warnings	99.38	0	0.620029	0	0													F7
No	214.084	5.912	0.044	1	2	10022.6	4	0	0	No warnings	100	0	0	0	0													F5
No	214.084	5.905	0.036	1	2	8963.42	4	0	0.232927	No warnings	99.7671	0	0	0	0.232927													F15
No	214.096	2.211	0.081	1	1	6471.31	9	0.1	1.27077	Contaminating mass	91.7404	7.46525	0	0	0	0.79434	0	0	0	0								F6
No	214.096	2.213	0.096	1	1	16814.2	9	0.9	10.2671	Contaminating mass	60.7576	22.6907	0	0	13.1586	3.35525	0	0	0.0378353	0								F7
No	214.096	2.179	0.103	1	1	8282.11	9	0	0.163964	No warnings	99.664	0	0	0	0.204528	0.131512	0	0	0	0								F8
No	214.096	2.202	0.082	3	1	13047.8	9	0.2	2.48892	No warnings	95.8387	0.394269	0	0	0	2.97423	0	0	0	0.792764								F16
No	214.096	2.216	0.111	2	1	11256.8	9	1.2	13.1593	Contaminating mass	73.4183	0	0	0	14.4746	12.107	0	0	0	0								F5
No	214.096	2.201	0.084	1	1	3760.78	9	0	0.0358837	No warnings	99.9354	0	0	0	0	0.0645907	0	0	0	0								F1
No	214.096	2.197	0.088	1	1	8067.11	9	0	0.116658	No warnings	99.8242	0	0	0	0	0.126386	0	0	0.026817	0.0226061								F14
No	214.096	2.268	0.085	1	1	13066.4	9	0	0.0963372	No warnings	99.8361	0	0	0	0	0.151992	0	0	0	0.0118975								F13
No	214.096	2.2	0.079	2	1	8117.4	9	0	0.19023	No warnings	99.7199	0	0	0	0	0.192068	0	0	0.0407729	0.0472826								F15
No	214.096	5.188	0.038	3	2	20104.1	9	2.7	30.2989	Irregular exchange	66.9358	2.91143	0	0	0.311821	0	0	0	0.0368881	29.804								F14
No	214.096	5.26	0.063	2	2	68605.5	9	4.5	49.7364	Contaminating mass	16.7443	0	0	0.000553547	0	72.6728	2.20357	0	4.36795	4.01082								F5
No	214.096	5.105	0.138	1	2	14016	9	0	0	No warnings	100	0	0	0	0	0	0	0	0	0								F8
No	214.096	5.378	0.77	2	2	28128.1	9	5.1	56.2633	Contaminating mass	3.18359	0	0	0.00158355	0	88.5319	0	4.08073	2.67972	1.52246								F1
No	214.096	5.122	0.154	3	2	25932.9	9	3	33.4798	Irregular exchange	43.0549	0	0	0	0	52.022	0	1.90979e-06	3.09978	1.82334								F16
No	214.096	5.115	0.13	1	2	15850.8	9	0	0.0484063	No warnings	99.6838	0.286275	0	0	0	0.0298765	0	0	0	0								F7
No	214.096	5.255	0.065	2	2	63220.6	9	4.1	45.3001	Contaminating mass	18.4673	0	0	0	0	81.5216	0	0	0.00718376	0.00390463								F6
No	214.096	5.218	0.038	3	2	43968.6	9	2.3	25.2095	Irregular exchange	60.3779	2.24059	0	0	0	27.943	0	2.61584e-06	0.0166763	9.42183								F13
No	214.096	5.185	0.066	2	2	31774.1	9	2.5	27.4988	Irregular exchange	63.7616	2.92677	0	0	0	13.8098	0	0	0.00316357	19.4987								F15
No	214.096	7.19	0.073	2	1	4817.31	9	0.7	7.68801	Contaminating mass	86.1616	0	0	0	0	13.8384	0	0	0	0								F5
No	214.096	7.183	0.074	1	1	4792.95	9	1.3	14.5899	Contaminating mass	73.7382	0	0	0	0	26.2618	0	0	0	0								F6
No	214.096	7.186	0.082	2	1	3497.49	9	3.9	42.8036	Low pattern fit	22.9535	0	0	0	0	77.0465	0	0	0	0								F16
No	214.096	7.185	0.071	2	1	4342.65	9	4.5	49.8258	Irregular exchange	10.3135	0	0	2.24796e-05	0	89.6864	0	0	0	0								F14
No	214.096	7.185	0.071	1	1	4366.78	9	0	0	No warnings	100	0	0	0	0	0	0	0	0	0								F1
No	214.096	7.164	0.076	2	1	1983.65	9	1.5	16.234	Contaminating mass	70.7835	0	0	0.000545451	0	29.2098	0	0	0	0.00615195								F8
No	214.096	7.208	0.072	2	1	3035.39	9	4.1	45.1085	Irregular exchange	18.8047	0	0	0.000189795	0	81.1951	0	0	0	0								F13
No	214.096	7.186	0.07	1	1	4389.21	9	0	0.0204876	No warnings	99.9631	0	0	0	0	0.0368778	0	0	0	0								F7
No	214.096	7.179	0.119	2	1	2094.71	9	3.7	41.3329	Irregular exchange	25.6003	0	0	0.00138928	0	74.3983	0	0	0	0								F15
No	214.1	9.996	0.147	6	1	2125.73	14	7.3	52.3415	Irregular exchange	10.3375	0	0	11.7148	0	0	10.3775	0	35.9667	0	0	31.6035	0	0	0			F16
No	214.1	10.033	0.102	4	1	1261.61	14	7.9	56.2607	Irregular exchange	0	0.000300492	0.00790437	9.56257	0	0	23.5373	0	39.3631	0	0	27.5288	0	0	0			F15
No	214.1	9.983	0.077	5	1	7381.95	14	8.1	57.6098	Contaminating mass	21.9243	0	0	6.01125	0	0	0.000674539	0.000389627	31.0746	0	0	11.3141	0	0	29.6746			F5
No	214.1	9.68	0.047	5	1	5855.06	14	8.7	62.1141	Contaminating mass	3.5833	0	0	6.32263	0	0	0.0012734	0.000638142	58.5752	3.61841e-05	0.137315	19.5573	0	0	11.8224			F6
No	214.1	9.728	0.094	3	1	9640.14	14	9.8	70.0063	Irregular exchange	3.75938	7.24715e-05	0.00190634	2.30626	5.50163e-05	0.000589677	2.3464	0.000627345	50.0338	1.39781e-05	0	7.6346	4.02978e-07	1.19924e-06	33.9163			F13
No	214.1	10.004	0.137	4	1	3142.05	14	9.1	65.2859	Contaminating mass	12.508	0.000110268	0.00290057	13.8946	0	0	0	0	0	0.000267342	0	52.6689	0	0	20.9252			F7
No	214.1	9.996	0.067	3	1	20758	14	8.4	59.6719	Contaminating mass	6.4655	0.000176463	0.0046418	7.61386	0	0	0.00133898	0.000778971	65.0416	0	0	0	4.02645e-07	1.19825e-06	20.8721			F1
No	214.1	10.025	0.232	4	1	3149.32	14	6.7	47.7962	Contaminating mass	20.4329	0	0	2.09168	0	0	0.00137007	0.000791377	63.1161	0	0	14.3572	0	0	0			F8
No	214.109	14.155	0.069	1	1	7361.4	7	0	0	No warnings	100	0	0	0	0	0	0	0										F13
No	214.109	14.148	0.06	1	1	13227.9	7	0	0	No warnings	100	0	0	0	0	0	0	0										F8
No	214.109	14.139	0.065	1	1	5433.95	7	0	0	No warnings	100	0	0	0	0	0	0	0										F6
No	214.109	14.119	0.066	1	1	7850.65	7	0	0	No warnings	100	0	0	0	0	0	0	0										F14
No	214.109	14.142	0.087	1	1	3098.67	7	0	0	No warnings	100	0	0	0	0	0	0	0										F15
No	214.109	14.152	0.064	1	1	7503.93	7	0	0	No warnings	100	0	0	0	0	0	0	0										F7
No	214.109	14.146	0.071	1	1	5175.03	7	0	0	No warnings	100	0	0	0	0	0	0	0										F1
No	214.109	14.146	0.097	1	1	6708.9	7	0	0	No warnings	100	0	0	0	0	0	0	0										F5
No	214.109	14.142	0.063	1	1	9803.47	7	0	0	No warnings	100	0	0	0	0	0	0	0										F16
No	214.118	15.287	0.553	3	1	14554.3	7	1.5	20.9568	Contaminating mass	72.3516	0	1.55886e-05	0	15.6137	0	0	12.0346										F5
No	214.118	15.11	0.187	2	1	6584.36	7	1	14.9187	Irregular exchange	73.8952	0	0	0	26.101	0	0	0.00387956										F14
No	214.118	15.335	0.112	1	1	1825.95	7	4	56.925	Low pattern fit	0.429619	0	0	0	99.506	0	0	0.064376										F16
No	214.118	15.212	0.166	2	1	15263.1	7	2.8	40.413	Irregular exchange	45.0491	0	0.000246632	0	33.9027	0.028324	7.22348e-05	21.0196										F13
No	214.118	15.207	0.121	3	1	3061.62	7	1.2	17.122	Contaminating mass	74.447	0	0	0	19.6722	0	0	5.88073										F1
No	214.118	15.283	0.424	3	1	10282.8	7	1.9	26.4798	Contaminating mass	65.0251	0	0	0	19.8219	0	0	15.153										F7
No	214.118	15.219	0.222	3	1	6495.09	7	3.7	52.9822	Irregular exchange	37.0541	0	0	0	23.2486	0	0	39.6973										F15
No	214.118	15.287	0.691	3	1	16128.8	7	1.3	18.9141	Contaminating mass	77.4242	0	2.16875e-05	0	8.54382	0	0	14.0319										F6
No	214.118	15.231	0.082	2	1	6670.41	7	5.4	76.8584	Contaminating mass	0.783682	0	0	0	52.1684	0	0	47.0479										F8
No	214.118	7.186	0.115	4	1	89714	7	0.2	3.18803	No warnings	95.2167	1.49135	0	0	0.739532	0	0	2.55239										F15
No	214.118	7.157	0.109	4	1	196371	7	0.1	1.5937	Contaminating mass	97.0921	1.33938	0	0	0.387729	0	0	1.1808										F6
No	214.118	7.111	0.127	3	1	387915	7	0.1	1.32177	No warnings	97.5557	1.30346	0	0	0	0.0183801	0	1.12244										F1
No	214.118	7.148	0.118	5	1	158935	7	0.1	1.46786	No warnings	98.47	0	0	0	0.134018	0.0165382	0	1.37946										F14
No	214.118	7.157	0.108	5	1	172808	7	0.2	2.38194	No warnings	95.2397	2.52195	0	0	0.5056	0	0	1.73274										F13
No	214.118	7.141	0.152	4	1	178574	7	0.2	3.03149	Contaminating mass	93.7312	3.5773	0	0	0.399248	0	0	2.2923										F8
No	214.118	7.169	0.102	4	1	263207	7	0.1	1.07822	No warnings	97.73	1.30376	0	0	0.167623	0.00849041	0	0.790121										F5
No	214.118	7.173	0.151	4	1	185828	7	0.3	3.73535	Contaminating mass	90.8888	6.10809	0	0	0.320027	0.0110478	0	2.672										F7
No	214.118	7.166	0.108	5	1	195915	7	0.1	1.43784	No warnings	97.9513	0.631383	0	0	0.155762	0.0101637	0	1.25138										F16
[truncated: 54,188 more rows]

## Sheet: all compounds mz 580-2000
MFT Candidate	Molecular Weight	RT [min]	FWHM [min]	Max. # MI	# Adducts	Area	Max. Exchange	Avg. Exchange	Rel. Exchange [%]	Status	Exchange Rate [%]: 0	Exchange Rate [%]: 1	Exchange Rate [%]: 2	Exchange Rate [%]: 3	Exchange Rate [%]: 4	Exchange Rate [%]: 5	Exchange Rate [%]: 6	Exchange Rate [%]: 7	Exchange Rate [%]: 8	Exchange Rate [%]: 9	Exchange Rate [%]: 10	Exchange Rate [%]: 11	Exchange Rate [%]: 12	Exchange Rate [%]: 13	Exchange Rate [%]: 14	Exchange Rate [%]: 15	Exchange Rate [%]: 16	Study File ID
No	580.169	16.943	0.054	1	1	1093.24	16	0	0	No warnings	100	0	0	0	0	0	0	0	0	0	0	0	0	0	0	0	0	F4
No	580.272	8.029	0.057	3	1	1585.48	16	1.4	9.01873	Irregular exchange	86.7575	0.205268	0	0	0	0	0	0	0.000672496	0.00120724	4.31411e-05	12.3464	0.688972	0	0	0	0	F46
No	580.272	8.027	0.05	3	1	1402.89	16	1	6.52352	Contaminating mass	90.5109	0	0	0	0	0	0	0	0.000516783	0.000903801	0	9.48764	0	0	0	0	0	F20
No	580.272	8.026	0.05	3	1	2147.43	16	1.2	7.5586	Irregular exchange	88.1852	0.902207	0	0	0	0	0	0	0.000376368	0.000752345	0	10.9114	0	0	0	0	0	F45
No	580.272	8.029	0.051	4	1	3070.97	16	0.4	2.7076	No warnings	95.0282	1.13666	0	0	0	0	0	0	0.000208864	0.000365282	0	3.83454	0	0	0	0	0	F48
No	580.272	8.027	0.049	2	1	1890.62	16	0	0.260361	No warnings	95.8342	4.16577	0	0	0	0	0	0	0	0	0	0	0	0	0	0	0	F47
No	580.272	8.028	0.055	5	1	3632.1	16	0.2	0.969428	Contaminating mass	95.9154	2.95651	0	0	0	0	0	0	0	1.97276e-05	8.79283e-05	0.982035	0.145909	0	0	0	0	F17
No	580.272	8.028	0.052	2	1	3571.76	16	0	0.129476	No warnings	97.9284	2.07162	0	0	0	0	0	0	0	0	0	0	0	0	0	0	0	F19
No	580.272	8.028	0.05	3	1	1229.88	16	0.9	5.72896	Contaminating mass	90.6116	1.16057	0	0	0	0	0	0	0.000448093	0.000783669	0	8.22656	0	0	0	0	0	F18
No	580.296	17.982	0.035	2	1	1050.23	16	2.8	17.231	Contaminating mass	81.6193	0	0	0	0	0	0	0	0	0	0	8.32829e-05	0.00180778	0.00391634	0	18.3749	0	F18
No	580.296	17.96	0.045	3	1	3052.92	16	1.1	7.18379	Irregular exchange	88.9085	0	0	0	0	0.00211163	0.00255342	0.0074798	7.45765	0	0	1.24312e-05	0.000269839	0.000584572	0	2.74272	0.878085	F45
No	580.296	17.988	0.067	1	1	1083.1	16	0.1	0.438338	Low pattern fit	99.5617	0	0	0	0	0	0	0	0	0	0	0	0	0	0	0	0.438338	F20
No	580.296	17.969	0.026	1	1	1087.61	16	0.4	2.39818	Low pattern fit	97.6018	0	0	0	0	0	0	0	0	0	0	0	0	0	0	0	2.39818	F48
No	580.296	17.96	0.113	3	1	4907.58	16	11.6	72.2217	Irregular exchange	17.4588	0	0	0	0	0	0	0	0	0	0	0.00260318	0.0103135	0	82.5283	0	0	F47
No	580.296	17.973	0.036	2	1	2378.15	16	4.5	28.4267	Contaminating mass	67.5105	0	0	0	0	0	0	0	0	0	0.000177231	0.00421881	0.00629515	0	32.4788	0	0	F17
No	580.296	17.984	0.087	3	1	4339.03	16	8.8	55.0647	Contaminating mass	37.0659	0	0	0	0	0	0	0	0	0	0.000190325	0.00627399	0.0108585	0	62.9167	0	0	F4
No	580.296	17.98	0.068	3	1	3986.53	16	8.2	51.4129	Contaminating mass	41.2409	0	0	0	0	0	0	0	0	0	0	0.00217559	0.00756495	0	58.7494	0	0	F19
No	580.303	15.106	0.048	3	1	2073.58	16	1.8	11.2525	Irregular exchange	84.9957	0	0	0	0	0	0	0	0.000770242	0.000920681	0.00270126	0	14.9999	0	0	0	0	F48
No	580.303	15.093	0.063	2	1	1412.16	16	0	0	No warnings	100	0	0	0	0	0	0	0	0	0	0	0	0	0	0	0	0	F18
No	580.319	17.631	0.053	2	1	3614.55	16	0	0.0976044	No warnings	99.9024	0	0	0	0	0	0	0	0	0	0	0	0	0	0	0	0.0976044	F46
No	580.319	17.629	0.051	1	1	33485.1	16	0	0	No warnings	100	0	0	0	0	0	0	0	0	0	0	0	0	0	0	0	0	F45
No	580.319	17.616	0.024	1	1	59587.6	16	0	0	No warnings	100	0	0	0	0	0	0	0	0	0	0	0	0	0	0	0	0	F48
No	580.319	17.632	0.037	1	1	49315.8	16	0	0	No warnings	100	0	0	0	0	0	0	0	0	0	0	0	0	0	0	0	0	F47
No	580.319	17.621	0.054	1	1	56580	16	0	0	No warnings	100	0	0	0	0	0	0	0	0	0	0	0	0	0	0	0	0	F18
No	580.319	17.629	0.047	1	1	103581	16	0	0	No warnings	100	0	0	0	0	0	0	0	0	0	0	0	0	0	0	0	0	F4
No	580.319	17.625	0.055	1	1	38705.2	16	0	0	No warnings	100	0	0	0	0	0	0	0	0	0	0	0	0	0	0	0	0	F17
No	580.319	17.619	0.065	1	1	37066.5	16	0	0	No warnings	100	0	0	0	0	0	0	0	0	0	0	0	0	0	0	0	0	F20
No	580.319	17.623	0.05	1	1	32549.4	16	0	0	No warnings	100	0	0	0	0	0	0	0	0	0	0	0	0	0	0	0	0	F19
No	580.34	15.635	0.11	2	1	1426.35	16	10.1	63.3008	Contaminating mass	24.8033	10.4444	0	0	0	0.00191097	0	0	3.57233e-05	0.00568422	0.0277952	0.0166524	8.3392	0	0	0	56.361	F20
No	580.34	15.925	0.077	2	1	26615.6	16	12.5	78.1026	Irregular exchange	10.848	0.00117121	0	0.00777054	0.847495	0	0	0	0.000664487	0.0334716	0.0503353	0	41.4878	0	0	0.00918482	46.7141	F48
No	580.34	15.578	0.386	3	1	5926.09	16	7.9	49.2995	Irregular exchange	48.8821	0	0	0	0.000163733	0.00824406	0.00196692	0	3.38999	0	0	0	0.465751	0	0	0	47.2518	F47
No	580.34	15.6	0.095	2	1	1665.95	16	2.6	15.9639	Contaminating mass	77.5941	0	0	0	0.00141937	0.0603189	0.0126462	0	12.7831	0	0	0	0	0	0	0	9.54845	F17
No	580.34	15.584	0.11	2	1	3957.45	16	2	12.4738	Contaminating mass	85.0602	0	0	0	0	0	0	0	0.00137578	0.00775443	0.00668933	0	9.83737	0	0	0	5.08657	F4
No	580.34	15.592	0.124	1	1	3691.13	16	2.9	18.1795	Contaminating mass	78.9166	2.66424	0	0	0	0	0	0	0.000226643	0.00127745	0.00110198	0	1.62058	0	0	0	16.796	F19
No	580.34	15.597	0.146	2	1	4511.46	16	4.6	28.6339	Contaminating mass	63.2753	0	0	0	0.0011713	0.00880613	0.00600878	0	7.0648	0	0	0	18.1908	0	0	0	11.4531	F18
No	580.359	14.197	0.05	3	1	7005.32	16	0	0	No warnings	100	0	0	0	0	0	0	0	0	0	0	0	0	0	0	0	0	F46
No	580.359	14.197	0.05	5	1	14204.1	16	0.2	1.05781	No warnings	97.2829	0	0.798328	0	0	0	0	0.0218928	1.89689	0	0	0	0	0	0	0	0	F45
No	580.359	14.2	0.05	4	1	47512	16	0	0.0798113	No warnings	99.5779	0	0.323089	0.0618432	0	0	0	0	0	0	0	0.000256023	0.0368714	0	0	0	0	F48
No	580.359	14.199	0.05	3	1	5530.59	16	0	0	No warnings	100	0	0	0	0	0	0	0	0	0	0	0	0	0	0	0	0	F47
No	580.359	14.196	0.049	5	1	50837.6	16	0	0.163615	No warnings	99.2954	0	0.460954	0.0502553	0	0	0	0.00220689	0.191214	0	0	0	0	0	0	0	0	F18
No	580.359	14.196	0.051	5	1	90147.6	16	0.1	0.484749	No warnings	98.1946	0	1.11316	0	0	0	0	0.00789779	0.684299	0	0	0	0	0	0	0	0	F4
No	580.359	14.196	0.052	5	1	15773.4	16	0.1	0.797964	Contaminating mass	98.1862	0	0.287644	0	0	0	0	0.0174135	1.50878	0	0	0	0	0	0	0	0	F17
No	580.359	14.198	0.053	3	1	5459.19	16	0	0.000597658	No warnings	99.9952	0	0.00478127	0	0	0	0	0	0	0	0	0	0	0	0	0	0	F20
No	580.359	14.198	0.052	4	1	12197.9	16	0.2	0.941278	Contaminating mass	98.1148	0	0	0	0	0	0	0.0215102	1.86373	0	0	0	0	0	0	0	0	F19
No	580.454	17.255	0.066	4	4	235533	16	1.3	7.83194	Irregular exchange	67.1492	0	0	26.9838	2.94006	9.40092e-05	0.000224439	0.000203348	0.177695	7.10505e-05	0.0234214	2.26796	0.00164388	0.438788	0	0	0.0167567	F46
No	580.454	17.257	0.065	3	4	249229	16	6.4	39.7312	Irregular exchange	31.398	0	0.160491	15.5856	0.000568618	0.0507194	0	0	0.00488162	0.000704007	0.246574	45.3508	6.74594	0.415705	0	0	0.0400369	F45
No	580.454	17.262	0.067	4	4	617541	16	4.7	29.1464	Contaminating mass	52.5762	0	0	4.3512	3.24319	0.325436	0	0	0.00127473	0.000161214	0.0677522	35.5404	3.57267	0.321782	0	0	0	F17
No	580.454	17.256	0.07	6	4	1.76438e+06	16	1.8	11.0278	Contaminating mass	81.5805	0.557009	0	2.19692	0.27534	4.17596e-07	0	0.000294839	0.77868	2.4642e-05	0.0284957	13.4819	0.93195	0.168911	0	0	0	F4
No	580.454	17.25	0.057	2	4	166116	16	0.1	0.442312	No warnings	97.6283	0	0.0382373	2.3335	0	0	0	0	0	0	0	0	0	0	0	0	0	F48
No	580.454	17.254	0.079	3	4	185660	16	2.4	15.2586	Irregular exchange	77.41	0	0	0.00844712	0.578969	4.04383e-06	6.66082e-05	4.8764e-05	0.058296	0	0.0563976	21.8877	0	0	0	0	0	F47
No	580.454	17.252	0.061	4	4	302959	16	0.7	4.21337	Contaminating mass	89.7564	0.0341815	0.0606817	5.44661	0.113445	0	0	0	0.000195467	0	0.010409	4.5781	0	0	0	0	0	F18
No	580.454	17.252	0.066	3	4	200187	16	5.6	34.8212	Contaminating mass	40.0561	0	0.176455	10.7926	2.1141	0	0	0	0.00230624	0.00013545	0.117752	46.1324	0.608186	0	0	0	0	F20
No	580.454	17.261	0.063	3	4	199911	16	5.2	32.7813	Contaminating mass	51.2445	0	0	0.0165938	2.02412	0	0	0	0.00416607	0	0.211812	45.9556	0	0	0	0	0.543145	F19
No	581.133	3.678	0.082	9	2	5412.82	16	13	81.2141	No warnings	0	0	0	0	0	0	0	0	0	0.00911995	9.24499	7.4771	20.5106	25.0957	19.0205	12.2841	6.35789	F47
No	581.133	3.736	0.08	9	2	4449.21	16	13	81.3865	No warnings	0	0	0	0	0	0	0	0	0	0.00536783	7.58838	9.51963	18.3264	24.9114	21.9204	12.7692	4.95917	F46
No	581.133	3.695	0.066	9	2	6104.34	16	13.1	81.806	No warnings	0	0	0	0	0	0	0	0	0	0.011504	7.68659	9.64198	18.3019	23.9588	19.0205	13.5694	7.80939	F45
No	581.133	3.687	0.077	5	2	2491.57	16	10.9	67.9826	No warnings	0	0	0	0	0	0	0	0.041816	0.0241161	0.490331	50.4792	28.8749	4.74627	11.3555	3.98779	0	0	F48
No	581.133	3.697	0.08	4	2	6889.82	16	1	6.13945	Contaminating mass	91.0415	0	0	0	0	0	0	0	0	0.275475	0.0950156	8.25482	0.333223	0	0	0	0	F17
No	581.133	3.689	0.079	4	2	8514.01	16	1.4	8.6981	Contaminating mass	87.365	0	0	0	0	0	0	0	0	0.331906	0.176666	11.1018	1.02466	0	0	0	0	F19
No	581.133	3.698	0.079	5	2	5690.78	16	0.8	5.03169	Contaminating mass	92.5438	0	0	0	0	0	0.0119782	0	0.478831	0.154542	0.0725041	6.37207	0.366318	0	0	0	0	F20
No	581.133	3.688	0.075	4	2	3694.68	16	0.5	3.02601	Contaminating mass	95.5715	0	0	0	0	0	0	0	0	0.145703	0.00587592	4.27691	0	0	0	0	0	F18
No	581.354	8.854	0.039	1	1	1592.57	16	0	0	Low pattern fit	100	0	0	0	0	0	0	0	0	0	0	0	0	0	0	0	0	F47
No	581.354	8.852	0.053	1	1	1222.42	16	0	0	No warnings	100	0	0	0	0	0	0	0	0	0	0	0	0	0	0	0	0	F17
No	581.45	17.206	0.048	3	1	18682.8	16	0	0.213029	No warnings	99.7565	0	0	0	0	0	0	0	0	0	0	2.53588e-05	9.28042e-05	1.30787e-05	0.24335	0	0	F17
No	581.45	17.208	0.054	1	1	3991.09	16	0	0	No warnings	100	0	0	0	0	0	0	0	0	0	0	0	0	0	0	0	0	F46
No	581.45	17.203	0.054	1	1	4160.41	16	0	0	No warnings	100	0	0	0	0	0	0	0	0	0	0	0	0	0	0	0	0	F45
No	581.45	17.198	0.043	1	1	3550.11	16	0	0	No warnings	100	0	0	0	0	0	0	0	0	0	0	0	0	0	0	0	0	F47
No	581.45	17.205	0.045	2	1	18254.4	16	0	0	No warnings	100	0	0	0	0	0	0	0	0	0	0	0	0	0	0	0	0	F18
No	581.45	17.207	0.051	2	1	236189	16	0	0	No warnings	100	0	0	0	0	0	0	0	0	0	0	0	0	0	0	0	0	F4
No	581.45	17.206	0.056	2	1	10597.8	16	0	0	No warnings	100	0	0	0	0	0	0	0	0	0	0	0	0	0	0	0	0	F20
No	581.45	17.203	0.047	2	1	17852.1	16	0	0	No warnings	100	0	0	0	0	0	0	0	0	0	0	0	0	0	0	0	0	F19
No	581.451	16.625	0.114	4	1	12727.2	16	0.7	4.13849	Contaminating mass	95.0076	0	0	0	0	0	7.98073e-05	0	0.00479765	0.72758	0	0	0	0.0105233	4.24942	0	0	F4
No	581.451	16.618	0.101	2	1	10647.2	16	0.1	0.676767	Contaminating mass	99.2264	0	0	0	0	0	0	0	0	0	0	5.58584e-05	5.89621e-05	0.00189566	0.771593	0	0	F20
No	581.451	16.674	0.12	3	1	8686.71	16	0.1	0.474078	No warnings	99.4581	0	0	0	0	0	0	0	0	0	0	3.9129e-05	4.13032e-05	0.00132792	0.540504	0	0	F48
No	581.451	16.632	0.089	3	1	7430.73	16	0.2	1.51924	No warnings	98.3792	0	0	0	0	0	0	0	0	0	0	0	9.90702e-05	0.000161306	0.0030343	1.61747	0	F45
No	581.451	16.656	0.164	2	1	14232.1	16	0.1	0.598372	No warnings	99.3616	0	0	0	0	0	0	0	0	0	0	0	3.902e-05	6.35322e-05	0.0011951	0.637061	0	F19
No	581.451	16.611	0.118	2	1	7482.3	16	0	0	No warnings	100	0	0	0	0	0	0	0	0	0	0	0	0	0	0	0	0	F46
No	581.451	16.67	0.115	2	1	9040.85	16	0	0	No warnings	100	0	0	0	0	0	0	0	0	0	0	0	0	0	0	0	0	F47
No	581.451	16.636	0.099	2	1	12669.1	16	0	0	No warnings	100	0	0	0	0	0	0	0	0	0	0	0	0	0	0	0	0	F17
No	581.451	16.626	0.083	2	1	10401.7	16	0	0	No warnings	100	0	0	0	0	0	0	0	0	0	0	0	0	0	0	0	0	F18
No	581.487	18.027	0.063	1	1	1332.71	16	0	0	No warnings	100	0	0	0	0	0	0	0	0	0	0	0	0	0	0	0	0	F46
No	581.487	17.97	0.111	2	1	6811.42	16	0	0	No warnings	100	0	0	0	0	0	0	0	0	0	0	0	0	0	0	0	0	F17
No	581.487	17.99	0.114	2	1	20522.7	16	0.1	0.547885	No warnings	91.2338	8.76616	0	0	0	0	0	0	0	0	0	0	0	0	0	0	0	F4
No	581.487	18.027	0.041	1	1	1135.6	16	0	0	No warnings	100	0	0	0	0	0	0	0	0	0	0	0	0	0	0	0	0	F19
No	581.487	17.992	0.07	2	1	3763.22	16	0.1	0.833765	Contaminating mass	86.6598	13.3402	0	0	0	0	0	0	0	0	0	0	0	0	0	0	0	F18
No	581.54	16.199	0.076	2	1	1598.84	16	0	0.0488409	No warnings	99.2185	0.781454	0	0	0	0	0	0	0	0	0	0	0	0	0	0	0	F45
No	581.54	16.204	0.071	1	1	1565.67	16	0	0	No warnings	100	0	0	0	0	0	0	0	0	0	0	0	0	0	0	0	0	F20
No	581.54	16.179	0.052	1	1	1043.29	16	0	0	No warnings	100	0	0	0	0	0	0	0	0	0	0	0	0	0	0	0	0	F48
No	581.54	16.192	0.079	2	1	1307.47	16	0	0.00412542	No warnings	99.934	0.0660067	0	0	0	0	0	0	0	0	0	0	0	0	0	0	0	F46
No	581.54	16.182	0.082	2	1	1588.18	16	0	0	No warnings	100	0	0	0	0	0	0	0	0	0	0	0	0	0	0	0	0	F47
No	581.54	16.19	0.094	2	1	1469.4	16	0	0	No warnings	100	0	0	0	0	0	0	0	0	0	0	0	0	0	0	0	0	F17
No	581.54	16.209	0.096	2	1	1851.35	16	0	0	No warnings	100	0	0	0	0	0	0	0	0	0	0	0	0	0	0	0	0	F4
No	581.54	16.196	0.084	2	1	1445.02	16	0	0	No warnings	100	0	0	0	0	0	0	0	0	0	0	0	0	0	0	0	0	F19
No	581.54	16.186	0.057	2	1	1313.57	16	0	0	No warnings	100	0	0	0	0	0	0	0	0	0	0	0	0	0	0	0	0	F18
No	581.878	16.349	0.048	2	1	3076.44	16	1.5	9.37484	Contaminating mass	90.6252	0	0	0	0	0	0	0	0	0	0	0	0	0	0	0	9.37484	F19
No	581.887	15.23	0.081	3	1	1055.58	16	0.5	3.30106	No warnings	93.7847	0.000793255	0	2.4175	0	0	0	0	0	0.000137214	6.75785e-05	0	3.79681	0	0	0	0	F48
No	581.887	15.229	0.06	3	1	1298.6	16	0.9	5.53671	Contaminating mass	91.5953	0	0	1.36313	0	0	0	0	0	0.000254464	0.000125325	0	7.0412	0	0	0	0	F19
No	582.186	2.646	0.067	2	1	1262.88	16	0	0	No warnings	100	0	0	0	0	0	0	0	0	0	0	0	0	0	0	0	0	F20
No	582.186	2.654	0.077	5	1	1008.11	16	0.5	3.072	No warnings	68.9212	18.9863	9.4924	0	1.81988	0.780268	0	0	0	0	0	0	0	0	0	0	0	F48
No	582.214	6.953	0.035	3	1	1302.94	16	0.1	0.472775	No warnings	92.4356	7.56439	0	0	0	0	0	0	0	0	0	0	0	0	0	0	0	F48
No	582.214	6.938	0.025	2	1	1137.65	16	0.1	0.770747	Contaminating mass	87.668	12.332	0	0	0	0	0	0	0	0	0	0	0	0	0	0	0	F17
No	582.214	6.942	0.041	2	1	1818.74	16	0	0.0941124	No warnings	98.4942	1.5058	0	0	0	0	0	0	0	0	0	0	0	0	0	0	0	F19
No	582.214	6.953	0.036	2	1	1150.38	16	0	0.0797235	No warnings	98.7244	1.27558	0	0	0	0	0	0	0	0	0	0	0	0	0	0	0	F18
No	582.267	11.216	0.074	3	1	1042.94	16	0.3	1.93231	No warnings	84.2556	14.3651	0	0	0	0	0	0	0	2.59985e-05	0	0	1.3793	0	0	0	0	F45
No	582.267	11.207	0.07	3	1	1090.09	16	0.6	3.64191	Contaminating mass	88.9547	6.75207	0	0	0	0	0	0	0	8.09216e-05	0	0	4.29315	0	0	0	0	F20
No	582.267	11.211	0.08	3	1	1055.81	16	1.1	6.80226	Irregular exchange	83.8106	7.76688	0	0	0	0	0	0	0	0.000158753	0	0	8.42233	0	0	0	0	F48
No	582.267	11.213	0.07	3	1	1048.71	16	0.6	3.73432	No warnings	87.7582	7.92289	0	0	0	0	0	0	0	8.14049e-05	0	0	4.31879	0	0	0	0	F46
No	582.267	11.21	0.072	3	1	1164.6	16	0.4	2.32609	No warnings	84.0633	14.0021	0	0	0	0	0	0	0	3.6465e-05	0	0	1.93458	0	0	0	0	F47
No	582.267	11.206	0.075	3	1	1061.4	16	0.9	5.43358	Contaminating mass	87.913	5.28244	0	0	0	0	0	0	0	0.000128258	0	0	6.80447	0	0	0	0	F17
No	582.267	11.218	0.059	2	1	1180.31	16	0	0.0344294	No warnings	99.4491	0.550871	0	0	0	0	0	0	0	0	0	0	0	0	0	0	0	F4
No	582.267	11.208	0.072	3	1	1125.28	16	1	6.39615	Contaminating mass	83.4277	8.77529	0	0	0	0	0	0	0	0.000146962	0	0	7.79681	0	0	0	0	F19
No	582.267	11.208	0.073	2	1	1054.5	16	0	0.0392424	No warnings	99.3721	0.627878	0	0	0	0	0	0	0	0	0	0	0	0	0	0	0	F18
No	582.291	7.047	0.059	2	1	1003.4	16	0	0	No warnings	100	0	0	0	0	0	0	0	0	0	0	0	0	0	0	0	0	F17
No	582.435	15.42	0.067	3	4	114695	16	0.1	0.355054	No warnings	99.5258	0	0	0	0.130146	0	0	0	0	0	0	0	0.000114207	0.000215447	0	0.34374	0	F45
No	582.435	15.409	0.057	4	4	830089	16	0.1	0.525457	No warnings	98.5114	0.62248	0.103775	0	0.2056	0	0	0	0	0	0.00297435	0.390737	0.00617316	9.82642e-05	0	0.156778	0	F4
No	582.435	15.413	0.076	4	4	85532.8	16	0	0.120664	No warnings	99.6692	0	0.0629982	0	0.201169	0	0	0	0	0	0	0	2.21308e-05	4.17489e-05	0	0.0666095	0	F46
No	582.435	15.413	0.071	3	4	166650	16	0.1	0.324207	No warnings	98.3954	0	0	1.54976	0	0	0.0198965	0	0	0	0	0.000228282	0.0346339	0	0	0	3.32379e-05	F48
No	582.435	15.408	0.061	3	4	240269	16	0.2	1.13084	No warnings	96.4646	0	0.0569694	2.53452	0	0	0	0	0	0	0.00713168	0.936784	0	0	0	0	0	F47
No	582.435	15.414	0.065	3	4	208235	16	0	0.210262	No warnings	99.694	0	0	0	0	0	0	0	0	0	0.0023123	0.303733	0	0	0	0	0	F18
No	582.435	15.414	0.071	3	4	202410	16	0	0.028787	No warnings	99.8911	0	0	0	0.0965133	0	0.0124233	0	0	0	0	0	0	0	0	0	0	F17
No	582.435	15.405	0.078	3	4	109853	16	0	0.0708476	No warnings	99.2709	0.594338	0	0	0.134806	0	0	0	0	0	0	0	0	0	0	0	0	F20
No	582.435	15.412	0.068	5	4	187772	16	0.1	0.483195	No warnings	98.4262	0.114541	0	0.931956	0.0526037	0.0265401	0	0	0	0.00388139	0.444267	0	0	0	0	0	0	F19
No	582.435	15.209	0.105	4	4	260419	16	0.2	1.31586	Contaminating mass	98.1851	0.00743497	5.62801e-06	0.00015299	0.140406	0	0	0	0.0001865	0.000560255	0.00119082	1.12704	1.80438e-05	0.000252609	0	0.537663	0	F18
No	582.435	15.21	0.11	5	4	300335	16	0.7	4.22633	Contaminating mass	90.7553	0.129356	1.71025	1.99382	0	0	0	0	0.000382111	0.00113903	3.19719	1.7093	3.24008e-05	0.000127483	0.246476	0.25665	0	F4
No	582.435	15.206	0.107	4	4	210570	16	0.2	1.25436	No warnings	94.0721	0.296395	4.63231	0	0	0	0	0	6.98071e-05	0.000207084	0.667197	0.285403	1.55422e-06	2.17587e-05	0	0.0463122	0	F45
No	582.435	15.207	0.113	6	4	217960	16	0.2	0.971263	No warnings	97.8768	0.810561	0	0.265177	0.12747	0	0	0	0	5.54738e-05	0.000207705	0.124776	0.0210338	1.73596e-05	3.95306e-05	0.586061	0.187813	F48
No	582.435	15.206	0.111	4	4	241862	16	0.1	0.416003	No warnings	98.288	0.938212	0	0.354239	0	0	0	0	6.79439e-05	0.000204107	0.00043383	0.410577	0	7.62622e-07	1.73661e-06	0	0.00825081	F20
No	582.435	15.207	0.105	4	4	189055	16	0.1	0.316556	No warnings	97.0268	1.43308	0.98857	0.551555	0	0	0	0	0	0	0	0	0	0	0	0	0	F46
No	582.435	15.208	0.111	4	4	227604	16	1	6.17005	Irregular exchange	89.0761	7.83728e-06	1.23709	0.057511	0.0312046	0	0	0.00178012	0.00478106	0.0162761	9.5752	0	0	0	0	0	0	F47
No	582.435	15.213	0.094	4	4	248297	16	0	0.286629	No warnings	98.039	0.0972831	1.10223	0.76144	0	0	0	0	0	0	0	0	0	0	0	0	0	F17
No	582.435	15.207	0.107	4	4	263864	16	0.7	4.06689	Contaminating mass	93.2119	0.129927	0.181754	0	0.190707	0	0	0	0.000338906	0.000997169	5.32576	0.958603	0	0	0	0	0	F19
No	583.083	2.338	0.102	4	1	28475	15	0	0.111371	No warnings	99.8715	0	0	0	0	0	0	0	0	0	7.02455e-07	2.49306e-06	0	0.128502	0	0		F18
No	583.083	2.415	0.099	13	1	23543.7	15	3.8	25.5627	No warnings	4.72205	10.0592	14.3956	19.0927	16.9891	13.6204	8.33341	5.8098	3.68124	2.13866	1.05461	0	0	0.103147	0	0		F46
No	583.083	2.354	0.113	6	1	40189.6	15	0	0.151185	No warnings	99.0378	0.808682	0	0	0.0596287	0	0	0	0	0	5.1324e-07	1.82152e-06	0	0.0938886	0	0		F19
No	583.083	2.355	0.112	4	1	28666.6	15	0	0.0881448	No warnings	99.0642	0.903593	0	0	0	0	0	0	0	0	1.76008e-07	6.24664e-07	0	0.0321977	0	0		F20
No	583.083	2.401	0.125	12	1	32482.9	15	3.9	25.7426	No warnings	4.74852	9.39337	14.5819	19.1915	16.5035	14.1764	8.41784	6.01444	3.68569	2.03292	1.07103	0.182907	0	0	0	0		F45
No	583.083	2.371	0.114	10	1	23008.8	15	2.1	13.8772	No warnings	23.0606	20.0205	18.8675	18.2311	10.2251	5.21255	2.62929	1.16804	0.473843	0.11157	0	0	0	0	0	0		F48
No	583.083	2.373	0.099	12	1	32931.8	15	3.7	24.7652	No warnings	6.14108	9.70851	14.875	18.3647	17.6279	14.2372	7.8624	4.9443	3.44418	2.08891	0.6741	0.0317405	0	0	0	0		F47
No	583.083	2.359	0.117	3	1	40247.7	15	0	0.0578646	No warnings	99.2635	0.703582	0	0	0	0.0328774	0	0	0	0	0	0	0	0	0	0		F17
No	583.227	9.627	0.072	2	1	2108.79	16	0	0	No warnings	100	0	0	0	0	0	0	0	0	0	0	0	0	0	0	0	0	F20
No	583.227	9.627	0.063	2	1	1374.22	16	0	0	No warnings	100	0	0	0	0	0	0	0	0	0	0	0	0	0	0	0	0	F17
No	583.335	17.219	0.006	1	1	1372.85	16	0	0.0252307	No warnings	99.9327	0	0	0	0	0	0.0672818	0	0	0	0	0	0	0	0	0	0	F45
No	583.335	17.205	0.018	1	1	5575.39	16	0	0	No warnings	100	0	0	0	0	0	0	0	0	0	0	0	0	0	0	0	0	F48
No	583.335	17.187	0.014	1	1	5088.84	16	0	0.225708	Low pattern fit	99.3981	0	0	0	0	0	0.601889	0	0	0	0	0	0	0	0	0	0	F47
No	583.335	17.17	0.005	1	1	2240.23	16	0	0.0371304	No warnings	99.9629	0	0	0	0	0	0	0	0	0	0	0	0	0	0	0	0.0371304	F17
No	583.335	17.198	0.059	1	1	19582	16	0.1	0.836614	Contaminating mass	99.1442	0	0	0	0	0	0.0307302	0	0	0	0	0	0	0	0	0	0.825091	F4
No	583.335	17.173	0.028	1	1	1617.82	16	0.2	1.46205	Contaminating mass	98.5379	0	0	0	0	0	0	0	0	0	0	0	0	0	0	0	1.46205	F20
No	583.335	17.179	0.012	1	1	4468.9	16	0	0.0468594	No warnings	99.875	0	0	0	0	0	0.124958	0	0	0	0	0	0	0	0	0	0	F18
No	583.354	17.597	0.06	2	2	8458.99	16	0.4	2.50158	Irregular exchange	93.2859	0	0	0	0	0.259124	6.45494	0	0	0	0	0	0	0	0	0	0	F46
No	583.354	17.598	0.059	4	2	107199	16	0.1	0.317522	No warnings	99.3647	0	0	0	0	0.000133382	0.000339582	0.00072568	0.634071	0	0	0	0	0	0	0	0	F45
No	583.354	17.6	0.043	3	2	325383	16	0.1	0.378286	No warnings	99.1349	0	0	0	0	0.000398717	0.00204388	0.862617	0	0	0	0	0	0	0	0	0	F48
No	583.354	17.595	0.058	4	2	205818	16	0.4	2.24837	No warnings	96.4816	0	0	0	0	0.000307868	0.00157817	0.666066	0	0	0.0541941	2.79623	0	0	0	0	0	F47
No	583.354	17.606	0.062	3	2	117370	16	1.1	6.56878	Contaminating mass	85.0056	0	0	0.00088319	0.00152673	0.00501269	0.0279242	14.7729	0.186064	0	0	0	0	0	0	0	0	F17
No	583.354	17.603	0.043	4	2	146460	16	0.1	0.661839	Contaminating mass	98.6945	0	0	0	0	0.000433407	0.00222171	0.937668	0	0	0.00694342	0.358256	0	0	0	0	0	F18
No	583.354	17.602	0.049	4	2	309248	16	0.2	1.23989	Contaminating mass	97.3279	0	0	0	0	0.000545114	0.00260051	2.43316	0	0	0.00323281	0.166802	1.39682e-05	0	0.0657423	0	0	F4
No	583.354	17.6	0.038	4	2	91657.9	16	0.6	3.82603	Contaminating mass	89.9892	1.76164	0	0	0	0.0029835	0.0150864	7.79622	0	0	0.00826898	0.426651	0	0	0	0	0	F20
No	583.354	17.599	0.056	4	2	107797	16	0.7	4.29737	Contaminating mass	90.4791	0	0	0	0	0.00310655	0.0155775	8.96629	0	0	0.0101894	0.525735	0	0	0	0	0	F19
No	583.375	17.907	0.022	2	1	3513.74	16	0.2	1.42754	Contaminating mass	98.3681	0	0	0	0	0	0	0	0	0	0	0.000137275	7.75075e-05	0.00496296	1.62669	0	0	F18
No	583.375	17.979	0.011	2	1	1122.54	16	5.8	36.0282	Contaminating mass	60.4559	0	0	0	0	0	0	0	0	0.00147254	0	0.0643739	13.9804	0	0	0	25.4978	F4
No	583.406	17.801	0.078	4	5	290931	16	1.7	10.672	Irregular exchange	85.2285	0.175446	1.6448	0.000193857	0.00536214	1.79186	0	0	0	2.39351	0	0.0052727	0.842889	0.000496407	0.000730948	0	7.91096	F48
No	583.406	17.795	0.068	4	5	108971	16	1.2	7.40229	Irregular exchange	89.5181	3.4395e-05	0	0.000876399	0.491261	1.79244	0	0	0	2.60631	0.0160953	1.06148	0	0.000201991	0.000430532	0	4.51275	F47
No	583.406	17.837	0.1	6	5	30719.3	16	7	43.8512	Irregular exchange	0.255591	2.70522	1.72201	0	0	37.0872	11.9759	0.0754186	19.7244	7.77722	1.04092	16.2893	0	0.000189475	0	1.27966	0.0670312	F46
No	583.406	17.788	0.069	5	5	59724.9	16	2.5	15.5639	Contaminating mass	64.2869	0.00157246	0.223997	0	0.00941458	21.6643	2.05623	0.378871	0.37341	6.79689	0.744228	0.358017	0	0.000183906	0.000270798	0.0127516	3.09299	F20
No	583.406	17.794	0.064	4	5	182040	16	1.8	11.051	Contaminating mass	81.9274	1.03159	0	0	0	0.106362	5.42793	0.0567602	0.122316	4.91278	0	0.538993	0.71197	0.000137687	0.000285588	0	5.16347	F18
No	583.406	17.786	0.076	4	5	122043	16	0.4	2.72946	Contaminating mass	94.3772	0.728526	0	0	0.00695151	2.14459	0.197931	0	0.0392291	0.377844	0	0.731405	0.773975	3.90445e-05	5.74921e-05	0	0.62223	F19
No	583.406	17.787	0.071	6	5	56957.2	16	0.9	5.85325	Irregular exchange	84.4057	0	0	0	0.00816713	10.6596	1.36834	0.421581	0.13397	2.15091	0.652187	0.196683	0	0	0	0	0.00279343	F45
No	583.406	17.794	0.086	6	5	299614	16	0.3	2.14859	Contaminating mass	94.8371	2.22916	0	0	0	0	0.0522294	0.150441	0.000389516	1.03861	0	0.585585	0.401896	0	0.547296	0.0113168	0.145952	F4
No	583.406	17.79	0.076	4	5	85542.7	16	0.3	1.7867	Contaminating mass	95.8391	0.123778	0.0403579	0	0.00608022	2.32083	0	0	0	0.960187	0	0.403046	0.306581	0	0	0	0	F17
No	583.431	15.986	0.107	6	1	139170	16	7	43.5622	Contaminating mass	47.1327	1.03563	0	0	0	0	0	0	0	0	0	0.00125777	0.00460556	31.5001	19.4109	0	0.914786	F20
No	583.431	15.998	0.108	6	1	183284	16	7.4	46.4571	Contaminating mass	43.5673	1.31484	0	0.0181659	0	0	0	0	0	0	0	0.000587679	0.00220614	30.4586	24.1316	0	0.506723	F19
No	583.431	15.998	0.108	5	1	186179	16	7	43.8981	Contaminating mass	47.92	0	0	0	0	0	0	0	0	0	0	0.00128386	0.0046204	28.5744	22.5817	0	0.918054	F18
No	583.431	16.034	0.095	5	1	115204	16	5.1	32.1851	Irregular exchange	61.3499	0	0	0	0	0	0	0	0	0	0	0.000788347	0.0028781	28.4644	9.01572	0	1.16634	F45
No	583.431	16.018	0.103	5	1	123002	16	6.8	42.5306	Irregular exchange	49.5529	0	0	0	0	0	0	0	0	0	0	0.00153712	0.00555577	28.3814	19.7306	2.0287	0.299301	F48
No	583.431	15.995	0.114	6	1	215378	16	7.9	49.3039	Contaminating mass	41.7398	0	0	0	0	0	0	0	0	0	0	0	0	28.1726	28.7393	1.30551	0.0428556	F4
No	583.431	16.051	0.108	4	1	139155	16	5.6	35.2863	Irregular exchange	57.9589	0	0	0	0	0	0	0	0	0	0.000823371	0.00378077	0.0090602	25.7911	15.322	0	0.914361	F47
No	583.431	16	0.121	6	1	181883	16	7.9	49.68	Contaminating mass	41.6732	0	0	0	0	0	0	0	0	0	0	0	0	25.1481	29.9523	3.00018	0.226208	F17
No	583.431	16.072	0.116	5	1	98804.5	16	4.7	29.6702	Irregular exchange	65.1101	0	0	0	0	0	0	0	0	0	0	0.00110358	0.00389593	16.608	16.8347	0	1.44215	F46
No	583.433	16.992	0.062	3	1	2236.25	16	0.2	1.21837	Irregular exchange	95.1656	0	0	0	4.80317	0	0	0	0	0.0312563	0	0	0	0	0	0	0	F46
No	583.433	17.017	0.026	2	1	2531.88	16	1.3	8.09199	Low pattern fit	0	96.5513	0	0	0	0	0	1.6927	0	0	0	0	1.75596	0	0	0	0	F45
No	583.433	16.987	0.103	2	1	8647.53	16	0.7	4.43332	Low pattern fit	82.2667	0	0	0	17.7333	0	0	0	0	0	0	0	0	0	0	0	0	F48
No	583.433	17.014	0.154	4	1	13100.5	16	0.8	4.93487	Low pattern fit	84.2437	0	0	0	13.7366	0	0	0	0	0.0101706	0.0971094	0	1.91239	0	0	0	0	F47
No	583.433	16.94	0.11	2	1	1771.1	16	8.4	52.4542	Contaminating mass	0	0.191516	1.87151	0	41.7553	0	0	0	0	0.111664	2.7672	0	53.3029	0	0	0	0	F17
No	583.433	17.011	0.412	3	1	24707.4	16	1.6	10.1361	Contaminating mass	76.0016	0	0	0	15.6665	0	0	0	0	0.0163638	0.405607	0	7.81239	0	0	0	0.0974724	F19
No	583.433	17.017	0.031	2	1	9618.66	16	0.9	5.43027	Contaminating mass	92.7182	0	0	0	0	0	0	0	0	0.0270764	0.208045	0	7.04669	0	0	0	0	F20
No	583.433	17.016	0.157	2	1	10480.8	16	0.7	4.23309	Contaminating mass	83.0676	0	0	0	16.9324	0	0	0	0	0	0	0	0	0	0	0	0	F18
No	583.466	16.112	0.042	3	1	1848.37	16	0.7	4.55141	Irregular exchange	86.8137	0	8.02152	0	0	0	0	0	0	0	0.0426088	5.12013	0	0	0	0	0.00199788	F45
No	583.466	16.208	0.04	3	1	16642.8	16	0.3	1.89582	No warnings	70.4748	29.3907	0	0	0	0	0.00181434	0.132318	0	0	0	0	0	0	0	0	0.000329758	F46
No	583.466	16.105	0.053	2	1	2017.5	16	0.2	1.49933	Contaminating mass	97.9997	0	0	0	0	0	0	0	0	0	0	0.0143849	1.98592	0	0	0	0	F20
No	583.466	16.2	0.105	4	1	39026.4	16	0.1	0.919475	No warnings	89.5443	8.83104	0.309031	0	1.31562	0	0	0	0	0	0	0	0	0	0	0	0	F48
No	583.466	16.177	0.026	3	1	5362.49	16	0.4	2.60482	No warnings	94.6598	0	0	0	2.49942	0	0	0	0	0	0.0197027	2.37085	0.45025	0	0	0	0	F47
No	583.466	16.198	0.069	4	1	44664.1	16	0.1	0.360583	No warnings	94.4351	5.49794	0	0	0.0666921	0	0	0	0	0	0	0	0	0	0	0	0.000288533	F17
No	583.466	16.158	0.042	4	1	12530.6	16	0.2	1.03249	Contaminating mass	93.0869	0	6.35236	0	0.0349584	0	0.00515137	0.52062	0	0	0	0	0	0	0	0	0	F19
No	583.466	16.227	0.056	3	1	37582.8	16	0	0.201582	No warnings	98.6182	0	1.15095	0	0.230852	0	0	0	0	0	0	0	0	0	0	0	0	F18
No	583.467	15.236	0.121	2	1	15409.8	16	0	0	No warnings	100	0	0	0	0	0	0	0	0	0	0	0	0	0	0	0	0	F46
No	583.467	15.235	0.123	3	1	12927.3	16	0	0	No warnings	100	0	0	0	0	0	0	0	0	0	0	0	0	0	0	0	0	F45
No	583.467	15.242	0.106	2	1	14001	16	0	0	No warnings	100	0	0	0	0	0	0	0	0	0	0	0	0	0	0	0	0	F48
No	583.467	15.241	0.111	3	1	13364.4	16	0	0	No warnings	100	0	0	0	0	0	0	0	0	0	0	0	0	0	0	0	0	F47
No	583.467	15.24	0.105	3	1	19640.2	16	0	0.0588215	No warnings	99.0589	0.941144	0	0	0	0	0	0	0	0	0	0	0	0	0	0	0	F18
No	583.467	15.243	0.103	4	1	16823.5	16	0.1	0.443621	No warnings	97.1933	2.32957	0	0	0	0	0	5.15677e-05	0	0.00266113	0.474405	0	0	0	0	0	0	F4
No	583.467	15.239	0.106	3	1	18484.9	16	0	0	No warnings	100	0	0	0	0	0	0	0	0	0	0	0	0	0	0	0	0	F17
No	583.467	15.24	0.106	3	1	15279.9	16	0	0	No warnings	100	0	0	0	0	0	0	0	0	0	0	0	0	0	0	0	0	F20
No	583.467	15.239	0.116	3	1	16606.6	16	0	0	No warnings	100	0	0	0	0	0	0	0	0	0	0	0	0	0	0	0	0	F19
No	583.467	15.441	0.068	1	1	4991.11	16	0	0	No warnings	100	0	0	0	0	0	0	0	0	0	0	0	0	0	0	0	0	F45
No	583.467	15.469	0.075	2	1	8908.36	16	0	0	No warnings	100	0	0	0	0	0	0	0	0	0	0	0	0	0	0	0	0	F48
No	583.467	15.444	0.06	2	1	12544.3	16	0	0	No warnings	100	0	0	0	0	0	0	0	0	0	0	0	0	0	0	0	0	F47
No	583.467	15.442	0.07	2	1	10728.4	16	0	0	No warnings	100	0	0	0	0	0	0	0	0	0	0	0	0	0	0	0	0	F18
No	583.467	15.454	0.058	4	1	50561.7	16	0.1	0.572796	No warnings	98.9805	0	0	0	0	0	0	0	0.0107427	1.00876	0	0	0	0	0	0	0	F4
No	583.467	15.442	0.065	2	1	11796	16	0	0	No warnings	100	0	0	0	0	0	0	0	0	0	0	0	0	0	0	0	0	F17
No	583.467	15.445	0.083	2	1	6920.32	16	0	0	No warnings	100	0	0	0	0	0	0	0	0	0	0	0	0	0	0	0	0	F20
No	583.467	15.444	0.069	2	1	7432.68	16	0	0	No warnings	100	0	0	0	0	0	0	0	0	0	0	0	0	0	0	0	0	F19
No	583.467	16.756	0.092	4	1	404342	16	0	0.177355	No warnings	98.7872	0	0.800782	0.412039	0	0	0	0	0	0	0	0	0	0	0	0	0	F46
No	583.467	16.801	0.083	3	1	135047	16	0	0	No warnings	100	0	0	0	0	0	0	0	0	0	0	0	0	0	0	0	0	F45
No	583.467	16.736	0.094	4	1	774214	16	0	0	No warnings	100	0	0	0	0	0	0	0	0	0	0	0	0	0	0	0	0	F48
No	583.467	16.799	0.077	3	1	697233	16	0.2	1.09543	No warnings	82.4731	17.5269	0	0	0	0	0	0	0	0	0	0	0	0	0	0	0	F47
No	583.467	16.769	0.185	3	1	875613	16	0	0	No warnings	100	0	0	0	0	0	0	0	0	0	0	0	0	0	0	0	0	F18
No	583.467	16.754	0.105	4	1	1.38961e+06	16	0	0.053205	No warnings	99.7162	0	0	0.28376	0	0	0	0	0	0	0	0	0	0	0	0	0	F4
No	583.467	16.725	0.21	3	1	978735	16	0.1	0.55156	No warnings	91.175	8.82496	0	0	0	0	0	0	0	0	0	0	0	0	0	0	0	F17
No	583.467	16.797	0.132	2	1	197376	16	0	0	No warnings	100	0	0	0	0	0	0	0	0	0	0	0	0	0	0	0	0	F20
No	583.467	16.78	0.132	1	1	307517	16	0	0	No warnings	100	0	0	0	0	0	0	0	0	0	0	0	0	0	0	0	0	F19
No	583.467	16.535	0.073	2	1	211237	16	0	0	No warnings	100	0	0	0	0	0	0	0	0	0	0	0	0	0	0	0	0	F46
No	583.467	16.524	0.074	2	1	152175	16	0.1	0.496739	No warnings	92.0522	7.94782	0	0	0	0	0	0	0	0	0	0	0	0	0	0	0	F45
No	583.467	16.534	0.076	4	1	142052	16	0	0.0104561	No warnings	99.9403	0	0.0118244	0.0478827	0	0	0	0	0	0	0	0	0	0	0	0	0	F48
No	583.467	16.528	0.077	1	1	97564.1	16	0	0	No warnings	100	0	0	0	0	0	0	0	0	0	0	0	0	0	0	0	0	F47
No	583.467	16.53	0.069	3	1	244124	16	0.1	0.314144	No warnings	97.4868	0	2.51316	0	0	0	0	0	0	0	0	0	0	0	0	0	0	F18
No	583.467	16.525	0.08	4	1	422549	16	0	0.0196959	No warnings	99.9117	0	0	0.0757403	0	0	0	0.0125591	0	0	0	0	0	0	0	0	0	F4
No	583.467	16.528	0.068	2	1	169871	16	0	0.114894	No warnings	99.3872	0	0	0.612766	0	0	0	0	0	0	0	0	0	0	0	0	0	F17
No	583.467	16.527	0.098	2	1	260678	16	0	0	No warnings	100	0	0	0	0	0	0	0	0	0	0	0	0	0	0	0	0	F20
No	583.467	16.532	0.094	3	1	249710	16	0	0	No warnings	100	0	0	0	0	0	0	0	0	0	0	0	0	0	0	0	0	F19
No	583.467	16.659	0.057	3	1	128904	16	0.1	0.313984	No warnings	97.4881	0	2.51187	0	0	0	0	0	0	0	0	0	0	0	0	0	0	F46
No	583.467	16.635	0.122	4	1	218488	16	0	0.0744898	No warnings	99.4041	0	0.595919	0	0	0	0	0	0	0	0	0	0	0	0	0	0	F45
No	583.467	16.736	0.094	4	1	774214	16	0	0	No warnings	100	0	0	0	0	0	0	0	0	0	0	0	0	0	0	0	0	F48
No	583.467	16.655	0.118	3	1	370680	16	0.3	2.06046	Low pattern fit	67.0327	32.9673	0	0	0	0	0	0	0	0	0	0	0	0	0	0	0	F47
No	583.467	16.642	0.127	1	1	2685.35	16	3	18.658	Contaminating mass	0	0	1.47208	98.5279	0	0	0	0	0	0	0	0	0	0	0	0	0	F18
No	583.467	16.636	0.105	3	1	501196	16	0	0.0204775	No warnings	99.8362	0	0.16382	0	0	0	0	0	0	0	0	0	0	0	0	0	0	F4
No	583.467	16.725	0.21	3	1	978735	16	0.1	0.55156	No warnings	91.175	8.82496	0	0	0	0	0	0	0	0	0	0	0	0	0	0	0	F17
No	583.467	16.643	0.097	3	1	209257	16	0.1	0.89977	Contaminating mass	92.8018	0	7.19816	0	0	0	0	0	0	0	0	0	0	0	0	0	0	F20
No	583.467	16.64	0.075	3	1	237059	16	0.4	2.29229	Contaminating mass	67.8643	27.5947	4.54099	0	0	0	0	0	0	0	0	0	0	0	0	0	0	F19
No	584.058	17.172	0.044	2	1	7946.47	15	0	0	No warnings	100	0	0	0	0	0	0	0	0	0	0	0	0	0	0	0		F45
No	584.058	17.162	0.061	2	1	18582.2	15	0	0	No warnings	100	0	0	0	0	0	0	0	0	0	0	0	0	0	0	0		F48
No	584.058	17.161	0.057	1	1	9266.36	15	0	0	No warnings	100	0	0	0	0	0	0	0	0	0	0	0	0	0	0	0		F47
No	584.058	17.154	0.062	3	1	7129.06	15	0.3	1.88337	Contaminating mass	92.7916	4.87032	0	0	0	0	0	4.5427e-05	1.19497e-05	0	2.33798	0	0	0	0	0		F17
No	584.058	17.168	0.046	1	1	19273.6	15	0.1	0.466952	No warnings	92.9957	7.00429	0	0	0	0	0	0	0	0	0	0	0	0	0	0		F18
No	584.058	17.178	0.033	3	1	14763.4	15	0.2	1.45743	Contaminating mass	97.44	0.415372	0	0	0	0	0	4.16692e-05	1.09612e-05	0	2.14458	0	0	0	0	0		F4
No	584.058	17.153	0.073	2	1	9517.66	15	0	0	No warnings	100	0	0	0	0	0	0	0	0	0	0	0	0	0	0	0		F20
No	584.058	17.164	0.052	2	1	10749.7	15	0	0	No warnings	100	0	0	0	0	0	0	0	0	0	0	0	0	0	0	0		F19
No	584.141	5.437	0.048	8	1	1263.05	16	1.6	10.1501	No warnings	35.4105	18.1481	20.4405	11.2936	8.33043	3.41427	1.63946	1.3232	0	0	0	0	0	0	0	0	0	F45
No	584.141	5.445	0.055	8	1	1013.43	16	1.5	9.38073	No warnings	36.6947	19.0612	22.2423	11.6671	3.98062	3.0406	2.77563	0.53791	0	0	0	0	0	0	0	0	0	F47
No	584.141	5.44	0.051	3	1	1297.96	16	0	0.264054	No warnings	99.2958	0	0	0	0.000209131	0	0.704004	0	0	0	0	0	0	0	0	0	0	F17
No	584.141	5.445	0.053	2	1	1545.19	16	0	0	No warnings	100	0	0	0	0	0	0	0	0	0	0	0	0	0	0	0	0	F19
No	584.141	5.755	0.049	7	1	1068.32	16	1.5	9.50199	No warnings	39.8631	15.0191	20.6078	11.1859	6.01284	5.67917	1.63204	0	0	0	0	0	0	0	0	0	0	F45
No	584.141	5.765	0.051	3	1	1138.85	16	0.3	1.91976	Contaminating mass	96.9283	0	0	0	0	0	0	0.000128592	0.000232489	0	3.07135	0	0	0	0	0	0	F17
No	584.141	5.767	0.054	3	1	1317.15	16	0.3	2.06622	Contaminating mass	96.694	0	0	0	0	0	0	0.000138402	0.000250225	0	3.30566	0	0	0	0	0	0	F19
No	584.283	7.574	0.06	2	1	2816.76	16	0	0	No warnings	100	0	0	0	0	0	0	0	0	0	0	0	0	0	0	0	0	F46
No	584.283	7.564	0.057	2	1	1997.64	16	0	0	No warnings	100	0	0	0	0	0	0	0	0	0	0	0	0	0	0	0	0	F20
No	584.283	7.571	0.049	2	1	3000.6	16	0	0.00329197	No warnings	99.9473	0.0526715	0	0	0	0	0	0	0	0	0	0	0	0	0	0	0	F45
No	584.283	7.566	0.057	2	1	4257.07	16	0	0	No warnings	100	0	0	0	0	0	0	0	0	0	0	0	0	0	0	0	0	F48
No	584.283	7.572	0.058	2	1	2485.23	16	0	0	No warnings	100	0	0	0	0	0	0	0	0	0	0	0	0	0	0	0	0	F47
No	584.283	7.564	0.064	2	1	2685.55	16	0	0	No warnings	100	0	0	0	0	0	0	0	0	0	0	0	0	0	0	0	0	F17
No	584.283	7.569	0.053	2	1	1891.45	16	0	0.0496166	No warnings	99.2061	0.793866	0	0	0	0	0	0	0	0	0	0	0	0	0	0	0	F4
No	584.283	7.572	0.057	2	1	2376.08	16	0	0	No warnings	100	0	0	0	0	0	0	0	0	0	0	0	0	0	0	0	0	F19
No	584.283	7.565	0.059	2	1	3272.55	16	0	0	No warnings	100	0	0	0	0	0	0	0	0	0	0	0	0	0	0	0	0	F18
No	584.318	6.451	0.061	2	1	1665.21	16	0	0	No warnings	100	0	0	0	0	0	0	0	0	0	0	0	0	0	0	0	0	F45
No	584.318	6.445	0.062	2	1	1514.44	16	0	0	No warnings	100	0	0	0	0	0	0	0	0	0	0	0	0	0	0	0	0	F20
No	584.318	6.443	0.064	2	1	1638.44	16	0	0	No warnings	100	0	0	0	0	0	0	0	0	0	0	0	0	0	0	0	0	F48
No	584.318	6.441	0.065	2	1	1649.29	16	0	0	No warnings	100	0	0	0	0	0	0	0	0	0	0	0	0	0	0	0	0	F46
No	584.318	6.436	0.062	3	1	1728.52	16	0	0	No warnings	100	0	0	0	0	0	0	0	0	0	0	0	0	0	0	0	0	F47
No	584.318	6.449	0.056	2	1	1338.86	16	0	0	No warnings	100	0	0	0	0	0	0	0	0	0	0	0	0	0	0	0	0	F17
No	584.318	6.44	0.062	2	1	1087.66	16	0	0	No warnings	100	0	0	0	0	0	0	0	0	0	0	0	0	0	0	0	0	F4
No	584.318	6.439	0.068	2	1	1477.9	16	0	0	No warnings	100	0	0	0	0	0	0	0	0	0	0	0	0	0	0	0	0	F19
No	584.318	6.448	0.063	2	1	1308.59	16	0	0	No warnings	100	0	0	0	0	0	0	0	0	0	0	0	0	0	0	0	0	F18
No	584.32	7.58	0.05	2	1	1107.47	16	0	0	No warnings	100	0	0	0	0	0	0	0	0	0	0	0	0	0	0	0	0	F20
No	584.32	7.58	0.057	3	1	1339.28	16	0.1	0.649499	No warnings	97.9216	0	0	0	0	2.0784	0	0	0	0	0	0	0	0	0	0	0	F48
No	584.32	7.577	0.059	3	1	1041.76	16	0	0.230039	No warnings	99.2639	0	0	0	0	0.736125	0	0	0	0	0	0	0	0	0	0	0	F47
No	584.32	7.589	0.06	3	1	1821.2	16	0.8	4.91786	Contaminating mass	84.2628	0	0	0	0	15.7372	0	0	0	0	0	0	0	0	0	0	0	F17
No	584.32	7.575	0.05	1	1	1276.23	16	0	0	No warnings	100	0	0	0	0	0	0	0	0	0	0	0	0	0	0	0	0	F4
No	584.32	7.573	0.056	3	1	1450.48	16	0.1	0.461302	No warnings	98.5238	0	0	0	0	1.47617	0	0	0	0	0	0	0	0	0	0	0	F19
No	584.32	7.576	0.055	2	1	1187.26	16	0	0	No warnings	100	0	0	0	0	0	0	0	0	0	0	0	0	0	0	0	0	F18
No	584.326	16.883	0.033	4	1	1826.2	16	2.7	16.6388	Contaminating mass	67.8441	7.19896	0	0	0	0	0.00172805	0.00234545	0.00774195	0	23.3622	0	0	0	0	0.0142969	1.56856	F4
No	584.333	10.023	0.061	2	1	1039.71	16	0.1	0.702393	No warnings	88.7617	11.2383	0	0	0	0	0	0	0	0	0	0	0	0	0	0	0	F48
No	584.333	10.033	0.052	2	1	1108.29	16	0.1	0.503556	No warnings	91.9431	8.05689	0	0	0	0	0	0	0	0	0	0	0	0	0	0	0	F4
No	584.333	10.023	0.067	2	1	1019.56	16	0.3	1.81353	Contaminating mass	92.7215	5.10462	0	0	0	0	0	0	8.26067e-05	0.000321849	0	2.17348	0	0	0	0	0	F19
No	584.369	6.039	0.048	3	1	1626.12	16	0	0	No warnings	100	0	0	0	0	0	0	0	0	0	0	0	0	0	0	0	0	F45
No	584.369	6.039	0.053	2	1	1057.56	16	0	0	No warnings	100	0	0	0	0	0	0	0	0	0	0	0	0	0	0	0	0	F48
No	584.369	6.038	0.058	2	1	1027.26	16	0	0	No warnings	100	0	0	0	0	0	0	0	0	0	0	0	0	0	0	0	0	F47
No	584.369	6.033	0.056	3	1	1237.7	16	0	0	No warnings	100	0	0	0	0	0	0	0	0	0	0	0	0	0	0	0	0	F4
No	584.369	6.037	0.057	2	1	1183.99	16	0	0.144314	No warnings	97.691	2.30902	0	0	0	0	0	0	0	0	0	0	0	0	0	0	0	F19
No	584.369	6.037	0.055	3	1	1999.95	16	0	0.0165182	No warnings	99.7357	0.264291	0	0	0	0	0	0	0	0	0	0	0	0	0	0	0	F18
No	584.469	16.036	0.048	3	1	2748.48	16	2	12.2072	Contaminating mass	80.3961	0	0	0.0990136	0	0	0	0.00396407	0.00890289	0	19.492	0	0	0	0	0	0	F17
No	584.47	15.447	0.08	1	1	1301.93	16	0	0	No warnings	100	0	0	0	0	0	0	0	0	0	0	0	0	0	0	0	0	F20
No	584.47	15.442	0.068	1	1	1224.94	16	0	0	No warnings	100	0	0	0	0	0	0	0	0	0	0	0	0	0	0	0	0	F45
No	584.47	15.447	0.067	1	1	2282.59	16	0	0	No warnings	100	0	0	0	0	0	0	0	0	0	0	0	0	0	0	0	0	F48
No	584.47	15.454	0.062	1	1	3177.6	16	0	0	No warnings	100	0	0	0	0	0	0	0	0	0	0	0	0	0	0	0	0	F47
No	584.47	15.446	0.072	1	1	3001.84	16	0	0.016906	No warnings	99.9831	0	0	0	0	0	0	0	0	0	0	0	0	0	0	0	0.016906	F17
No	584.47	15.443	0.06	2	1	13147.9	16	0	0.173071	No warnings	99.5382	0	0	0	7.27108e-05	0.00155163	0.460182	0	0	0	0	0	0	0	0	0	0	F4
No	584.47	15.447	0.073	1	1	2240.81	16	0	0	No warnings	100	0	0	0	0	0	0	0	0	0	0	0	0	0	0	0	0	F19
No	584.47	15.442	0.068	1	1	2802.88	16	0	0	No warnings	100	0	0	0	0	0	0	0	0	0	0	0	0	0	0	0	0	F18
No	584.47	15.233	0.12	1	1	4365.6	16	0	0	No warnings	100	0	0	0	0	0	0	0	0	0	0	0	0	0	0	0	0	F46
No	584.47	15.239	0.116	1	1	4480.93	16	0	0	No warnings	100	0	0	0	0	0	0	0	0	0	0	0	0	0	0	0	0	F20
No	584.47	15.234	0.082	1	1	3370.32	16	0	0	No warnings	100	0	0	0	0	0	0	0	0	0	0	0	0	0	0	0	0	F45
No	584.47	15.244	0.1	1	1	3784.71	16	0	0	No warnings	100	0	0	0	0	0	0	0	0	0	0	0	0	0	0	0	0	F48
No	584.47	15.248	0.097	1	1	3545.77	16	0	0	No warnings	100	0	0	0	0	0	0	0	0	0	0	0	0	0	0	0	0	F47
No	584.47	15.213	0.11	1	1	6058.12	16	0	0	No warnings	100	0	0	0	0	0	0	0	0	0	0	0	0	0	0	0	0	F17
No	584.47	15.243	0.12	1	1	5208.13	16	0	0	No warnings	100	0	0	0	0	0	0	0	0	0	0	0	0	0	0	0	0	F4
No	584.47	15.241	0.105	1	1	4683.99	16	0	0	No warnings	100	0	0	0	0	0	0	0	0	0	0	0	0	0	0	0	0	F19
No	584.47	15.239	0.118	1	1	5505.74	16	0	0	No warnings	100	0	0	0	0	0	0	0	0	0	0	0	0	0	0	0	0	F18
No	584.987	17.171	0.024	1	1	2494.32	16	0	0	No warnings	100	0	0	0	0	0	0	0	0	0	0	0	0	0	0	0	0	F45
No	584.987	17.169	0.015	1	1	6628	16	0	0	No warnings	100	0	0	0	0	0	0	0	0	0	0	0	0	0	0	0	0	F48
No	584.987	17.165	0.019	2	1	4525.73	16	0	0.203854	No warnings	96.7383	3.26167	0	0	0	0	0	0	0	0	0	0	0	0	0	0	0	F47
No	584.987	17.184	0.026	2	1	8171.24	16	0.1	0.416265	No warnings	99.5837	0	0	0	0	0	0	0	0	0	0	0	0	0	0	0	0.416265	F17
No	584.987	17.167	0.02	1	1	5909.2	16	0	0	No warnings	100	0	0	0	0	0	0	0	0	0	0	0	0	0	0	0	0	F18
No	584.987	17.196	0.063	2	1	25541.3	16	0	0	No warnings	100	0	0	0	0	0	0	0	0	0	0	0	0	0	0	0	0	F4
No	584.987	17.171	0.024	2	1	5279.08	16	0	0	No warnings	100	0	0	0	0	0	0	0	0	0	0	0	0	0	0	0	0	F20
No	584.987	17.191	0.137	1	1	11986.6	16	1.3	8.22425	Contaminating mass	91.7757	0	0	0	0	0	0	0	0	0	0	0	0	0	0	0	8.22425	F19
No	585.321	17.171	0.023	1	1	3207.97	16	0	0	No warnings	100	0	0	0	0	0	0	0	0	0	0	0	0	0	0	0	0	F45
No	585.321	17.168	0.021	1	1	6153.75	16	0	0	No warnings	100	0	0	0	0	0	0	0	0	0	0	0	0	0	0	0	0	F48
No	585.321	17.17	0.022	1	1	3819.68	16	0.2	1.05819	No warnings	98.9384	0	0	0	0	0	0	0	0	0	0	0	0	0	0	0.0553173	1.00633	F47
No	585.321	17.189	0.046	1	1	5750.09	16	0.2	1.16157	Contaminating mass	98.8346	0	0	0	0	0	0	0	0	0	0	0	0	0	0	0.0607215	1.10464	F17
No	585.321	17.168	0.018	1	1	5118.7	16	0.1	0.667713	Contaminating mass	99.3301	0	0	0	0	0	0	0	0	0	0	0	0	0	0	0.0349051	0.634989	F18
No	585.321	17.185	0.055	1	1	18164.9	16	0	0	No warnings	100	0	0	0	0	0	0	0	0	0	0	0	0	0	0	0	0	F4
No	585.321	17.174	0.023	1	1	4971.86	16	0.1	0.631389	Contaminating mass	99.3665	0	0	0	0	0	0	0	0	0	0	0	0	0	0	0.0330062	0.600446	F20
No	585.321	17.202	0.047	1	1	3220.35	16	0	0	No warnings	100	0	0	0	0	0	0	0	0	0	0	0	0	0	0	0	0	F19
No	585.334	16.523	0.24	3	1	98469.3	16	9.6	60.2035	Contaminating mass	34.0835	0	0	0	0	0.00459346	0	6.01816	0	0	0	0	0.0156223	0.0114209	0	37.0972	22.7695	F17
No	585.334	16.411	0.019	1	1	1738.98	16	12.9	80.8563	Contaminating mass	13.7511	0	0	0	0	0	0	0	0	0	0	0	0.00680712	0.00650283	0	86.2356	0	F20
No	585.334	16.505	0.095	2	1	44887	16	1.7	10.7613	Contaminating mass	89.0251	0	0	0	0	0	0	0	0	0	0	0	0.0127697	0.0037926	1.67784	0	9.28052	F4
No	585.334	16.387	0.048	1	1	1209.12	16	0	0.131816	No warnings	99.8682	0	0	0	0	0	0	0	0	0	0	0	0	0	0	0	0.131816	F48
No	585.375	9.503	0.057	2	1	1181.51	16	0	0.0131668	No warnings	99.7893	0.210668	0	0	0	0	0	0	0	0	0	0	0	0	0	0	0	F20
No	585.375	9.505	0.057	3	1	2908.29	16	0	0.205129	No warnings	96.7179	3.28206	0	0	0	0	0	0	0	0	0	0	0	0	0	0	0	F48
No	585.375	9.502	0.051	1	1	1539.66	16	0	0	No warnings	100	0	0	0	0	0	0	0	0	0	0	0	0	0	0	0	0	F47
No	585.375	9.502	0.056	2	1	1273.79	16	0	0	No warnings	100	0	0	0	0	0	0	0	0	0	0	0	0	0	0	0	0	F17
No	585.375	9.509	0.051	1	1	1589.53	16	0	0	No warnings	100	0	0	0	0	0	0	0	0	0	0	0	0	0	0	0	0	F4
No	585.375	9.505	0.05	2	1	1149.77	16	0	0	No warnings	100	0	0	0	0	0	0	0	0	0	0	0	0	0	0	0	0	F19
No	585.375	9.504	0.057	2	1	1299.34	16	0	0.188831	No warnings	96.9787	3.0213	0	0	0	0	0	0	0	0	0	0	0	0	0	0	0	F18
No	585.409	14.026	0.084	3	1	1996.93	16	2.4	14.859	Contaminating mass	66.4818	0	0	0	21.9985	0	0	0	0	0.000182783	0.000732711	0.00110292	0	11.5176	0	0	0	F4
No	585.409	14.06	0.061	4	1	2556.17	16	1.9	11.8757	Irregular exchange	83.6032	0	0	0	0	0.000293952	0.000426152	0	1.68628	0	0	0	14.7098	0	0	0	0	F48
No	585.409	14.056	0.068	2	1	1894.03	16	0.1	0.934556	Contaminating mass	98.1306	0	0	0	0	0.000323981	0.000514056	0	1.86852	0	0	0	0	0	0	0	0	F17
No	585.409	14.054	0.064	4	1	3930	16	0.4	2.78807	Contaminating mass	96.0808	0	0	0	0	0.000105241	0.00015789	0	0.604921	0	0	0	3.31402	0	0	0	0	F19
No	585.409	14.062	0.068	3	1	2315.83	16	0.6	3.53864	Contaminating mass	93.7048	1.72017	0	0	0	0	0	0	7.99648e-05	0.000372135	0.000539424	0	4.57406	0	0	0	0	F18
No	585.411	16.635	0.114	5	1	135960	16	11.7	73.2163	Low pattern fit	0.0507513	0	0	0	4.74357	1.15447	0	0	0	0	0.000177599	0.00111975	75.9491	18.1008	0	0	0	F46
No	585.411	16.786	0.03	5	1	64254.4	16	9.1	56.792	Contaminating mass	0.235243	0	0.000840692	25.7359	8.35306	0.353451	0	0	0	0.00134261	0.00606155	0.00263574	52.8673	12.4442	0	0	0	F17
No	585.411	16.814	0.029	6	1	50240.5	16	5.5	34.3285	Low pattern fit	0	0	0.000897203	46.5616	29.1648	0	0	0	0.184412	0	0	0.000429458	21.7122	2.37565	0	0	0	F48
No	585.411	16.932	0.032	4	1	4859.92	16	3.6	22.6548	Contaminating mass	2.75897	0	0	73.8676	19.4248	0	0	0	0	0	0	0	0	0	0	0.00433246	3.94433	F20
No	585.411	16.915	0.048	3	1	1079.34	16	5.5	34.1568	Irregular exchange	0	0.00238706	0.00353909	0.0940349	87.6787	0	0	0	0	0	0	0	0	0	0	0.0383547	12.183	F45
No	585.411	16.882	0.041	3	1	5940.21	16	3.6	22.3143	No warnings	0.719707	0	0	49.2785	49.2326	0	0	0	0	0	0	0	0	0	0	0.0441141	0.725013	F47
No	585.411	16.794	0.034	6	1	214061	16	6.2	38.9206	Contaminating mass	1.46834	0	0	46.0832	17.2005	1.04155	0	0	0	0.000590108	0.00275758	0	34.2029	0	0	0	8.65869e-05	F4
No	585.411	16.792	0.079	4	1	30794.9	16	3.1	19.4311	Contaminating mass	0.474168	0	0	87.205	12.3208	0	0	0	0	0	0	0	0	0	0	0	0	F19
No	585.411	16.875	0.149	5	1	37871.9	16	8.2	51.5382	Contaminating mass	0.321907	0	0	31.0336	11.5257	0	0	0	0	0.00162659	0.00697153	0	57.1102	0	0	0	0	F18
No	585.446	14.692	0.07	3	1	13464.8	16	0	0	No warnings	100	0	0	0	0	0	0	0	0	0	0	0	0	0	0	0	0	F46
No	585.446	14.691	0.093	3	1	19862.7	16	0	0	No warnings	100	0	0	0	0	0	0	0	0	0	0	0	0	0	0	0	0	F45
No	585.446	14.691	0.1	3	1	93033.1	16	0	0.0402628	No warnings	99.6779	0	0.322103	0	0	0	0	0	0	0	0	0	0	0	0	0	0	F48
No	585.446	14.7	0.072	3	1	17261.7	16	0	0	No warnings	100	0	0	0	0	0	0	0	0	0	0	0	0	0	0	0	0	F47
No	585.446	14.689	0.072	4	1	76653.7	16	0	0	No warnings	100	0	0	0	0	0	0	0	0	0	0	0	0	0	0	0	0	F18
No	585.446	14.686	0.069	4	1	537287	16	0	0	No warnings	100	0	0	0	0	0	0	0	0	0	0	0	0	0	0	0	0	F4
No	585.446	14.697	0.079	4	1	74898.7	16	0	0	No warnings	100	0	0	0	0	0	0	0	0	0	0	0	0	0	0	0	0	F17
No	585.446	14.69	0.091	3	1	23920.2	16	0	0	No warnings	100	0	0	0	0	0	0	0	0	0	0	0	0	0	0	0	0	F20
No	585.446	14.697	0.102	3	1	111744	16	0	0	No warnings	100	0	0	0	0	0	0	0	0	0	0	0	0	0	0	0	0	F19
No	585.446	11.554	0.162	2	1	1902.77	16	0	0	No warnings	100	0	0	0	0	0	0	0	0	0	0	0	0	0	0	0	0	F46
No	585.446	11.561	0.13	2	1	2091.36	16	0	0	No warnings	100	0	0	0	0	0	0	0	0	0	0	0	0	0	0	0	0	F20
No	585.446	11.56	0.138	2	1	2113.55	16	0	0	No warnings	100	0	0	0	0	0	0	0	0	0	0	0	0	0	0	0	0	F45
No	585.446	11.551	0.135	2	1	1962.82	16	0	0	No warnings	100	0	0	0	0	0	0	0	0	0	0	0	0	0	0	0	0	F48
No	585.446	11.567	0.12	2	1	1833.59	16	0	0	No warnings	100	0	0	0	0	0	0	0	0	0	0	0	0	0	0	0	0	F47
No	585.446	11.577	0.113	2	1	3736	16	0	0.102042	No warnings	98.3673	1.63267	0	0	0	0	0	0	0	0	0	0	0	0	0	0	0	F17
No	585.446	11.559	0.135	2	1	2598.37	16	0	0	No warnings	100	0	0	0	0	0	0	0	0	0	0	0	0	0	0	0	0	F4
No	585.446	11.563	0.131	2	1	2024.03	16	0	0.292118	No warnings	95.3261	4.67389	0	0	0	0	0	0	0	0	0	0	0	0	0	0	0	F19
No	585.446	11.553	0.144	2	1	2247.98	16	0	0	No warnings	100	0	0	0	0	0	0	0	0	0	0	0	0	0	0	0	0	F18
No	585.473	12.344	0.275	1	1	2197.88	16	0	0	No warnings	100	0	0	0	0	0	0	0	0	0	0	0	0	0	0	0	0	F17
No	585.473	12.35	0.245	2	1	14703.5	16	0	0	No warnings	100	0	0	0	0	0	0	0	0	0	0	0	0	0	0	0	0	F4
No	585.473	12.399	0.176	1	1	1466.78	16	0	0	No warnings	100	0	0	0	0	0	0	0	0	0	0	0	0	0	0	0	0	F18
No	585.871	16.729	0.065	2	1	4483.14	14	0	0	No warnings	100	0	0	0	0	0	0	0	0	0	0	0	0	0	0			F4
No	586.32	17.985	0.031	4	1	1793.73	16	4.2	25.9824	Irregular exchange	44.3045	0	4.96957	0	0	0	0.0140653	0	50.7119	0	0	0	0	0	0	0	0	F45
No	586.32	17.951	0.124	3	1	2009.54	16	5.9	36.697	Contaminating mass	26.5989	0	0	0	0	0.00639825	0.0190885	0	73.3756	0	0	0	0	0	0	0	0	F20
No	586.32	17.956	0.113	2	1	2949.3	16	7.5	46.9658	Irregular exchange	6.05957	0	0	0	0	0.00830165	0.022688	0	93.9094	0	0	0	0	0	0	0	0	F47
No	586.32	17.971	0.042	3	1	2275.14	16	3.7	23.2163	Contaminating mass	56.7486	0	0	0	0	0.00348694	0.0104029	0	39.9885	0	0	0	0	0	0	0.509694	2.73924	F17
No	586.32	17.976	0.074	3	1	3515.66	16	7.4	46.3685	Contaminating mass	7.52542	2.00668	0	0	0	0.00770572	0.0229892	0	88.3698	0	0	0	0	0	0	0.324337	1.74308	F4
No	586.405	17.204	0.062	3	1	1730.67	16	0.2	1.2547	No warnings	95.9986	1.73659	0	0	0	0	0	0.018307	2.21676	0	0	0	0	0	0	0	0.0297694	F46
No	586.405	17.196	0.083	3	1	13137.9	16	9.3	57.8818	Irregular exchange	16.4438	0	0	0	0	0	0	0	0	0	0	76.5659	6.99031	0	0	0	0	F45
No	586.405	17.22	0.045	1	1	3157.99	16	11	68.7166	No warnings	0	0	0	0	0	0	0	0	0	0	0.534553	99.4654	0	0	0	0	0	F48
No	586.405	17.217	0.023	2	1	8936.46	16	7.7	48.146	Irregular exchange	29.9354	0	0	0	0	0	0	0	0	0	0.374533	69.6901	0	0	0	0	0	F47
No	586.405	17.188	0.049	3	1	32797	16	7.6	47.3451	Contaminating mass	31.1167	0	0	0	0	0	0	0	0	0	0.194869	68.6884	0	0	0	0	0	F18
No	586.405	17.198	0.05	4	1	109081	16	1.4	9.05661	Contaminating mass	86.898	0	0	0	0	0	0	0	0	0	0.0688973	12.8199	0	0	0	0.21322	0	F4
No	586.405	17.193	0.043	3	1	12008.7	16	3.5	21.9464	Contaminating mass	68.0624	0	0	0	0	0	0	0	0	0	0.170723	31.7668	0	0	0	0	0	F17
No	586.405	17.198	0.04	3	1	13814.8	16	6.5	40.55	Contaminating mass	41.1959	0	0	0	0	0	0	0	0	0	0	56.8486	1.9555	0	0	0	0	F20
No	586.405	17.195	0.053	4	1	23090.5	16	5.9	36.5867	Contaminating mass	48.0772	0	0	0	0	0	0	0	0	0	0	37.6862	14.2366	0	0	0	0	F19
No	586.409	15.689	0.132	3	1	1941.83	16	8.5	52.9161	Irregular exchange	0.00740386	0.00264722	0.0839527	33.2925	0	0	0	0	0.000314458	0.00465036	0.0310063	52.6744	13.9031	0	0	0	0	F45
No	586.409	15.635	0.041	3	1	5038.5	16	6.3	39.6444	Contaminating mass	0.0160813	0.00478706	0.183843	58.3124	0	0	0	0	0.000156431	0.00215958	0.0143511	39.3013	2.02896	0	0	0	0.135929	F20
No	586.409	15.849	0.119	2	1	9099.17	16	8.5	53.0706	Irregular exchange	0.00944895	0.00532855	0.104381	34.154	9.09823	0	0	0	0.000210341	0.0048066	0.0112276	0	48.9736	0	0	0	7.63876	F47
No	586.409	15.596	0.062	2	1	2526.72	16	1.5	9.1792	Irregular exchange	51.766	0	0	48.0674	0	0	0	0	0	0	0	0	0	0	0	0	0.16655	F48
No	586.409	15.767	0.072	3	1	5588.32	16	5.6	34.9162	Irregular exchange	0.0239324	0.00592982	0.275452	69.414	0	0	0	0	0.000241827	0.00237605	0.014272	17.4687	11.5024	0	0	1.17424	0.118478	F46
No	586.409	15.519	0.147	4	1	3034.73	16	3.5	21.6192	Contaminating mass	22.0809	0	0	64.3592	1.48758	0	0	0	0	0.00114993	0.00255362	0	11.5637	0	0	0	0.504932	F17
No	586.409	15.565	0.064	1	1	1697.32	16	0	0.0511395	No warnings	99.9489	0	0	0	0	0	0	0	0	0	0	0	0	0	0	0	0.0511395	F4
No	586.409	15.552	0.054	3	1	4218.54	16	8.4	52.7898	Contaminating mass	15.6129	0	0	26.9037	0	0	0	0	0.00229523	0.00574008	0.00471347	14.0767	21.3349	0	0	0	22.0591	F18
No	586.417	15.712	0.142	1	1	14573.9	16	13	81.2483	Contaminating mass	0	0	0	0	0	0	0	0	0	0	0.00285191	0.00924761	0	99.9879	0	0	0	F17
No	586.417	15.439	0.031	5	1	37676.5	16	12.6	78.8545	Irregular exchange	0	0	0	0	0.000306183	0.000880998	0.00243318	1.67938	0	0	9.66679	0	2.53758e-05	88.2624	0	0.387826	0	F47
No	586.417	15.641	0.041	3	1	3775.23	16	13.3	83.1356	No warnings	0	0	0	0	0	0	0	0	0	0	0	0	0.00120759	82.6106	4.60622	12.782	0	F46
No	586.417	15.804	0.051	5	1	6993.95	16	10.7	67.1614	Irregular exchange	3.89821	2.47748	0	0	0	0.0399386	18.4428	0	0	0	0.00597412	9.09477	0	64.7327	0	1.30812	0	F48
No	586.417	15.567	0.059	3	1	7693.93	16	12.7	79.5213	Irregular exchange	0	0	0.000112187	0	0.00516588	0.019627	9.01211	0	0	0	0	0.00105041	0.00269964	60.2712	25.7403	4.94767	0	F45
No	586.417	15.802	0.025	2	1	3522.8	16	13.6	84.7655	Contaminating mass	0	0	0	0	0	0	0	0	0	0	0	0.00550215	0.0238434	43.6873	56.2834	0	0	F19
No	586.417	15.636	0.125	6	1	6899.22	16	9.6	60.2481	Contaminating mass	4.78484	0.820358	0	0	0	0.0401247	23.3909	0	0	0	0.00642568	58.7092	2.3281	0	0	9.92012	0	F4
No	586.417	15.646	0.112	6	1	5182.19	16	10.2	63.505	Contaminating mass	6.21633	0.508989	0	0	0	0	0	0	0	0.000403586	75.5627	0.228324	1.60684	0	0	15.8764	0	F18
No	586.417	15.882	0.098	7	1	40474	16	11	68.7709	Contaminating mass	3.43567	0	0	0	0	0.00295317	1.27099	0	0	0	48.7606	5.13994	0	30.9087	10.4812	0	0	F17
No	586.417	15.921	0.096	3	1	19062.5	16	10.8	67.7334	Contaminating mass	0	0	0	0	0	0	0	0.0095543	0.0278506	0	70.869	0	3.46193	25.6317	0	0	0	F19
No	586.417	15.884	0.102	6	1	39386.6	16	10.9	68.3653	Contaminating mass	0	0	0	0	8.95158e-05	0.000257563	0.00071215	0.491023	0	0	61.9002	11.2467	0	21.3679	4.9931	0	0	F18
No	586.417	15.918	0.116	5	1	22994.8	16	10.7	66.8126	Irregular exchange	0	0	0.000163053	0	0.00750807	0.0285258	13.0982	0	0	0	46.7084	8.20194	0	14.4403	17.515	0	0	F48
No	586.417	15.845	0.282	8	1	64236.8	16	10.1	63.1038	Contaminating mass	1.63223	0	0	0	0	0.0049977	2.15092	0	0	0	85.0492	0	0	10.0396	1.12309	0	0	F4
No	586.417	15.891	0.109	6	1	23362.2	16	9.8	60.9446	Contaminating mass	0.468899	0	0	0	0.0079849	0.0327136	14.952	0	0	0	69.8132	4.58571	0	5.32159	4.81784	0	0	F20
No	586.417	15.874	0.096	5	1	16805	16	10.1	63.0379	No warnings	0	0	5.04237e-05	0	0.00232185	0.00882155	4.05058	0	0	0	81.763	10.6114	0	0	3.56383	0	0	F45
No	586.417	15.888	0.119	3	1	17306.9	16	10.5	65.425	Irregular exchange	0	0	0	0	0	0	0	0	0.00150575	0.00725663	66.514	29.0328	0	0	4.44441	0	0	F46
No	586.417	15.889	0.106	5	1	15466.4	16	10.5	65.7153	Irregular exchange	0	0	0	0	0.000364122	0.00104747	0.00292191	1.9985	0	0	76.6674	8.91965	0.550186	0	11.8599	0	0	F47
No	586.418	14.949	0.051	3	1	1531.12	16	13.2	82.2001	No warnings	0	0	0	0	0	0	0	0	0	0	0	0	0.000256807	87.9552	8.88704	3.15755	0	F46
No	586.418	14.95	0.065	3	1	5706.9	16	13.2	82.2714	No warnings	0	0	0	0	0	0	0	0	0	0	0	0	0.000193486	83.6569	16.3429	0	0	F48
No	586.418	14.95	0.061	4	1	5870.75	16	13.1	82.0765	Contaminating mass	0.00324268	0.398508	0	0	0	0	0	0	0	0	0	0	0.000218109	82.5317	16.0843	0.982117	0	F17
No	586.418	14.952	0.056	5	1	6925.61	16	12.5	78.3385	Contaminating mass	4.95735	0	0	0	0	0	0	2.16378e-05	7.38704e-05	0.00020208	0.283707	0	0	76.9256	16.9514	0.881604	0	F18
No	586.418	14.954	0.061	5	1	9103.39	16	11.8	73.4457	Contaminating mass	10.4615	0	0	0	0	0	0	6.20342e-05	0.000211791	0.000577638	0.813226	0	0	75.594	12.6863	0.444159	0	F4
No	586.418	14.957	0.063	4	1	6214.29	16	11.9	74.2556	Contaminating mass	9.89711	0	0	0	0	0	0	0	0	0	0	0.00033162	0.0018549	73.3456	16.7551	0	0	F19
No	586.418	14.954	0.066	4	1	3574.17	16	12.4	77.4615	Contaminating mass	6.57702	0	0	0	0	0	0	0	0	0	0	0	0.000450582	68.5375	24.885	0	0	F20
No	586.418	14.948	0.059	4	1	2397.41	16	12.3	76.7123	Irregular exchange	0	0	0	0.00175487	0.00271941	0.0405479	13.094	0	0	0	0	6.75878e-05	0.00071913	67.4385	19.4217	0	0	F45
No	586.418	14.948	0.076	4	1	4311.74	16	12.6	78.6448	Irregular exchange	5.21634	0	0	0	0	0	0	4.60739e-05	0.000157388	0.000413326	0.602698	0	0	66.2396	27.9407	0	0	F47
No	586.442	18.014	0.031	4	1	5673.48	16	3.9	24.4756	Contaminating mass	63.5249	0	0	0	0	0	0	0	0	0	10.7626	25.1397	0	0.572791	0	0	0	F4
No	586.442	18.002	0.023	3	1	1118.76	16	6.4	39.8504	Irregular exchange	37.7028	0	0	0	0	0	0	0	0	0	47.6618	14.6354	0	0	0	0	0	F46
No	586.442	17.989	0.044	3	1	1477.16	16	7.6	47.7627	Contaminating mass	28.5831	0	0	0	0	0	0	0	0	0	21.3819	50.035	0	0	0	0	0	F20
No	586.442	18.018	0.101	2	1	1139.49	16	1.8	10.9385	Irregular exchange	82.4668	0	0	0	0	0	0	0	0	0.317203	17.216	0	0	0	0	0	0	F45
No	586.442	18.002	0.063	1	1	1005.43	16	11	68.6478	No warnings	0	0	0	0	0	0	0	0	0	0	1.63456	98.3654	0	0	0	0	0	F48
No	586.442	17.989	0.031	2	1	7074.13	16	8.2	51.1828	Contaminating mass	15.3783	0	0	0	0	0	0	0.233035	12.8948	0.803049	70.6907	0	0	0	0	0	0	F17
No	586.442	17.797	0.086	3	1	14096.7	16	9.5	59.6345	Contaminating mass	11.5987	0	0	0	0	0	0	0.0815175	3.77107	0.0702642	7.74588	75.4688	1.26372	0	0	0	0	F18
No	586.45	14.503	0.078	1	1	1046.61	16	0	0	No warnings	100	0	0	0	0	0	0	0	0	0	0	0	0	0	0	0	0	F45
No	586.45	14.498	0.071	1	1	1246.92	16	0	0	No warnings	100	0	0	0	0	0	0	0	0	0	0	0	0	0	0	0	0	F20
No	586.45	14.489	0.077	1	1	1330.1	16	0	0	No warnings	100	0	0	0	0	0	0	0	0	0	0	0	0	0	0	0	0	F47
No	586.45	14.678	0.125	2	1	27495.9	16	0	0	No warnings	100	0	0	0	0	0	0	0	0	0	0	0	0	0	0	0	0	F48
No	586.45	14.496	0.075	1	1	1138.36	16	0	0	No warnings	100	0	0	0	0	0	0	0	0	0	0	0	0	0	0	0	0	F46
No	586.45	14.499	0.075	1	1	1619.23	16	0	0	No warnings	100	0	0	0	0	0	0	0	0	0	0	0	0	0	0	0	0	F17
No	586.45	14.506	0.099	1	1	2468.69	16	0	0	No warnings	100	0	0	0	0	0	0	0	0	0	0	0	0	0	0	0	0	F4
No	586.45	14.694	0.101	2	1	30831.5	16	0	0	No warnings	100	0	0	0	0	0	0	0	0	0	0	0	0	0	0	0	0	F19
No	586.45	14.497	0.075	1	1	2244.84	16	0	0	No warnings	100	0	0	0	0	0	0	0	0	0	0	0	0	0	0	0	0	F18
No	587.167	3.693	0.065	2	1	1403.81	16	0	0	No warnings	100	0	0	0	0	0	0	0	0	0	0	0	0	0	0	0	0	F17
No	587.167	3.683	0.069	2	1	2037.55	16	0	0	No warnings	100	0	0	0	0	0	0	0	0	0	0	0	0	0	0	0	0	F19
No	587.28	7.568	0.056	2	1	1363.45	16	0	0	No warnings	100	0	0	0	0	0	0	0	0	0	0	0	0	0	0	0	0	F45
No	587.28	7.567	0.054	3	1	1222.99	16	0	0	No warnings	100	0	0	0	0	0	0	0	0	0	0	0	0	0	0	0	0	F47
No	587.28	7.569	0.053	2	1	1306.2	16	0	0	No warnings	100	0	0	0	0	0	0	0	0	0	0	0	0	0	0	0	0	F17
No	587.28	7.57	0.053	4	1	1442.2	16	0	0.272557	No warnings	99.2726	0	0	0	0	0.00372389	0.723714	0	0	0	0	0	0	0	0	0	0	F19
No	587.353	7.372	0.056	3	1	1506.17	16	0.5	3.3342	Irregular exchange	86.6632	0	0	0	13.3368	0	0	0	0	0	0	0	0	0	0	0	0	F46
No	587.353	7.365	0.05	3	1	1987.77	16	0.4	2.44064	Irregular exchange	90.2375	0	0	0	9.76254	0	0	0	0	0	0	0	0	0	0	0	0	F45
No	587.353	7.366	0.057	5	1	5084.71	16	0.4	2.25487	Irregular exchange	90.9805	0	0	0	9.01948	0	0	0	0	0	0	0	0	0	0	0	0	F48
No	587.353	7.367	0.055	4	1	2394.56	16	0.4	2.51503	Irregular exchange	89.9399	0	0	0	10.0601	0	0	0	0	0	0	0	0	0	0	0	0	F47
No	587.353	7.361	0.057	5	1	2900.02	16	0.4	2.45426	Contaminating mass	89.5361	1.40469	0	0	7.43254	1.62666	0	0	0	0	0	0	0	0	0	0	0	F17
No	587.353	7.385	0.056	4	1	1293.19	16	0.9	5.6941	Contaminating mass	77.2236	0	0	0	22.7764	0	0	0	0	0	0	0	0	0	0	0	0	F4
No	587.353	7.364	0.056	5	1	2845.54	16	0.3	1.85704	Contaminating mass	92.5718	0	0	0	7.42817	0	0	0	0	0	0	0	0	0	0	0	0	F19
No	587.353	7.364	0.055	5	1	2150.67	16	0.5	3.05935	Contaminating mass	87.7777	0	0	0	12.1617	0.0606066	0	0	0	0	0	0	0	0	0	0	0	F20
No	587.353	7.364	0.055	4	1	6009.82	16	0.2	1.54145	Contaminating mass	93.5552	0.371932	0	0	6.07283	0	0	0	0	0	0	0	0	0	0	0	0	F18
No	587.353	8.584	0.055	2	1	2041.82	16	0.1	0.363753	No warnings	94.1799	5.82005	0	0	0	0	0	0	0	0	0	0	0	0	0	0	0	F48
No	587.353	8.578	0.056	3	1	1741.92	16	0.2	1.54428	Contaminating mass	92.2217	2.13494	0	0	5.64337	0	0	0	0	0	0	0	0	0	0	0	0	F17
No	587.353	8.577	0.056	3	1	1476.28	16	0.3	1.96743	Contaminating mass	91.1888	1.25528	0	0	7.5559	0	0	0	0	0	0	0	0	0	0	0	0	F19
No	587.353	8.586	0.055	4	1	1359.18	16	0.2	0.963904	Contaminating mass	96.458	0	0	0	2.91481	0	0.627204	0	0	0	0	0	0	0	0	0	0	F18
No	587.354	8.293	0.057	2	1	1130.53	16	0.1	0.823737	Contaminating mass	98.682	0	0	0	0	0	0	7.71827e-05	0.000205788	0	1.31776	0	0	0	0	0	0	F20
No	587.354	8.294	0.059	2	1	1467.81	16	0	0	No warnings	100	0	0	0	0	0	0	0	0	0	0	0	0	0	0	0	0	F48
No	587.354	8.296	0.058	3	1	1025.31	16	0.2	1.48692	No warnings	97.6208	0	0	0	0	0	0	0.000139322	0.000371468	0	2.37868	0	0	0	0	0	0	F46
No	587.354	8.291	0.051	2	1	1253.15	16	0	0	No warnings	100	0	0	0	0	0	0	0	0	0	0	0	0	0	0	0	0	F47
No	587.354	8.291	0.055	3	1	1198.92	16	0.1	0.392797	No warnings	98.7428	0	0	0	0.0013966	1.25583	0	0	0	0	0	0	0	0	0	0	0	F17
No	587.354	8.293	0.053	3	1	1092.31	16	0.2	1.33947	Contaminating mass	96.2072	0.264648	0	0	0	0.00216574	3.526	0	0	0	0	0	0	0	0	0	0	F4
No	587.354	8.297	0.054	3	1	1306.36	16	0.3	2.09042	Contaminating mass	96.6552	0	0	0	0	0	0	0.000195869	0.000522235	0	3.34412	0	0	0	0	0	0	F19
No	587.354	8.296	0.044	3	1	1319.61	16	0.3	2.18673	Contaminating mass	96.5011	0	0	0	0	0	0	0.000204893	0.000546295	0	3.49819	0	0	0	0	0	0	F18
No	587.354	9.106	0.048	2	1	1128.69	16	0	0.0808089	No warnings	98.7071	1.29294	0	0	0	0	0	0	0	0	0	0	0	0	0	0	0	F45
No	587.354	9.102	0.051	1	1	1574.97	16	0	0	No warnings	100	0	0	0	0	0	0	0	0	0	0	0	0	0	0	0	0	F20
No	587.354	9.108	0.043	2	1	2287.08	16	0	0	No warnings	100	0	0	0	0	0	0	0	0	0	0	0	0	0	0	0	0	F48
No	587.354	9.112	0.048	2	1	1344.97	16	0	0.0526705	No warnings	99.1573	0.842728	0	0	0	0	0	0	0	0	0	0	0	0	0	0	0	F46
No	587.354	9.105	0.058	2	1	2063.69	16	0	0	No warnings	100	0	0	0	0	0	0	0	0	0	0	0	0	0	0	0	0	F47
No	587.354	9.106	0.05	2	1	1330.63	16	0.1	0.732759	Contaminating mass	97.069	0	0	0	2.93103	0	0	0	0	0	0	0	0	0	0	0	0	F17
No	587.354	9.117	0.039	2	1	1588.71	16	0.1	0.374753	No warnings	94.004	5.99605	0	0	0	0	0	0	0	0	0	0	0	0	0	0	0	F19
No	587.354	9.107	0.055	2	1	1438.7	16	0	0	No warnings	100	0	0	0	0	0	0	0	0	0	0	0	0	0	0	0	0	F18
No	587.361	17.256	0.148	4	1	16828.9	16	1.4	8.69866	No warnings	0.957004	96.0721	0	0	0	0.226113	0	0	0.00145542	0.275663	0	0	0	0	0	0	2.46771	F46
No	587.361	17.116	0.055	4	1	8484.87	16	9.1	56.7852	Irregular exchange	2.69257	14.6761	9.70102	0	0	0	0	0	0	0.00709727	0	0.657493	72.2658	0	0	0	0	F45
No	587.361	17.128	0.037	4	1	20365.1	16	7.8	48.9286	Irregular exchange	34.7112	0	0	0	0	0	0	0	0	0.00635363	0	0.588602	64.6938	0	0	0	0	F48
No	587.361	17.159	0.013	4	1	17095.3	16	6.9	43.1818	Irregular exchange	16.0911	28.013	2.36153	0	0	0	0	0	0	0.0048151	0	0.446072	49.0282	0	0	0	4.05523	F47
No	587.361	17.123	0.061	3	1	10937.7	16	8.2	51.2385	Contaminating mass	14.8651	21.8503	0	0	0	0	0	0	0	0.00520859	0	0.482525	53.0348	0	0	0	9.76206	F17
No	587.361	17.185	0.031	3	1	17631	16	3.4	21.2769	Contaminating mass	32.3988	43.2534	0	0	0	0	0	0	0	0.0022425	0	0.207746	22.8336	0	0	0	1.30431	F4
No	587.361	17.113	0.04	4	1	14077.2	16	9.5	59.1488	Contaminating mass	5.58272	7.0831	11.9849	0	0	0	0	0	0	0.00704537	0	0.652685	71.7373	0	0	0	2.95232	F19
No	587.361	17.172	0.02	2	1	3527.79	16	0.7	4.22211	Contaminating mass	32.4462	67.5538	0	0	0	0	0	0	0	0	0	0	0	0	0	0	0	F20
No	587.361	17.166	0.011	1	1	1097.53	16	1	6.06146	Contaminating mass	3.01656	96.9834	0	0	0	0	0	0	0	0	0	0	0	0	0	0	0	F18
No	587.368	13.63	0.055	2	1	1600.42	16	0	0	No warnings	100	0	0	0	0	0	0	0	0	0	0	0	0	0	0	0	0	F46
No	587.368	13.629	0.06	2	1	1620.17	16	0	0	No warnings	100	0	0	0	0	0	0	0	0	0	0	0	0	0	0	0	0	F20
No	587.368	13.628	0.057	2	1	2792.93	16	0	0.244345	No warnings	96.0905	3.90952	0	0	0	0	0	0	0	0	0	0	0	0	0	0	0	F45
No	587.368	13.632	0.052	2	1	1773.52	16	0	0	No warnings	100	0	0	0	0	0	0	0	0	0	0	0	0	0	0	0	0	F48
No	587.368	13.633	0.06	2	1	1358.81	16	0	0	No warnings	100	0	0	0	0	0	0	0	0	0	0	0	0	0	0	0	0	F47
No	587.368	13.626	0.054	3	1	3827.65	16	0	0.179454	No warnings	97.1287	2.87127	0	0	0	0	0	0	0	0	0	0	0	0	0	0	0	F17
No	587.368	13.63	0.055	2	1	2298.55	16	0	0	No warnings	100	0	0	0	0	0	0	0	0	0	0	0	0	0	0	0	0	F19
No	587.368	13.627	0.058	2	1	1235.43	16	0	0	No warnings	100	0	0	0	0	0	0	0	0	0	0	0	0	0	0	0	0	F18
No	587.405	15.093	0.048	2	1	2810.59	16	0.5	2.98242	Irregular exchange	84.0937	0	0	15.9063	0	0	0	0	0	0	0	0	0	0	0	0	0	F48
No	587.405	15.083	0.069	2	1	1356.07	16	0.3	1.68884	Contaminating mass	95.4964	0	0	0	0	0	4.50358	0	0	0	0	0	0	0	0	0	0	F17
No	587.405	15.099	0.064	2	1	2044.98	16	0.1	0.85659	Contaminating mass	86.2946	13.7054	0	0	0	0	0	0	0	0	0	0	0	0	0	0	0	F4
No	587.405	15.103	0.099	1	1	1263.63	16	0	0	No warnings	100	0	0	0	0	0	0	0	0	0	0	0	0	0	0	0	0	F19
No	587.405	15.083	0.059	1	1	2417.07	16	0	0	No warnings	100	0	0	0	0	0	0	0	0	0	0	0	0	0	0	0	0	F18
No	587.407	14.29	0.07	2	1	1331.47	16	0	0	No warnings	100	0	0	0	0	0	0	0	0	0	0	0	0	0	0	0	0	F46
No	587.407	14.264	0.027	2	1	1825.13	16	0	0	No warnings	100	0	0	0	0	0	0	0	0	0	0	0	0	0	0	0	0	F20
No	587.407	14.265	0.077	1	1	5643.51	16	0	0	No warnings	100	0	0	0	0	0	0	0	0	0	0	0	0	0	0	0	0	F45
No	587.407	14.295	0.075	1	1	1971.03	16	0	0	No warnings	100	0	0	0	0	0	0	0	0	0	0	0	0	0	0	0	0	F47
No	587.407	14.288	0.047	2	1	3451.74	16	0	0	No warnings	100	0	0	0	0	0	0	0	0	0	0	0	0	0	0	0	0	F17
No	587.426	12.515	0.061	2	1	1604.01	16	0	0	No warnings	100	0	0	0	0	0	0	0	0	0	0	0	0	0	0	0	0	F45
No	587.426	12.511	0.065	2	1	1408.34	16	0	0	No warnings	100	0	0	0	0	0	0	0	0	0	0	0	0	0	0	0	0	F20
No	587.426	12.519	0.061	2	1	1713.16	16	0	0	No warnings	100	0	0	0	0	0	0	0	0	0	0	0	0	0	0	0	0	F48
No	587.426	12.519	0.059	2	1	1474.45	16	0	0	No warnings	100	0	0	0	0	0	0	0	0	0	0	0	0	0	0	0	0	F46
No	587.426	12.513	0.061	2	1	1527.58	16	0	0	No warnings	100	0	0	0	0	0	0	0	0	0	0	0	0	0	0	0	0	F47
No	587.426	12.522	0.062	2	1	1607.64	16	0	0	No warnings	100	0	0	0	0	0	0	0	0	0	0	0	0	0	0	0	0	F17
No	587.426	12.515	0.059	3	1	1657.36	16	0.1	0.640806	Contaminating mass	98.7175	0	0	0	0	0.000220065	0.000161486	0.00590941	1.27618	0	0	0	0	0	0	0	0	F4
No	587.426	12.513	0.066	2	1	1635.79	16	0	0	No warnings	100	0	0	0	0	0	0	0	0	0	0	0	0	0	0	0	0	F19
No	587.426	12.515	0.058	2	1	1716.28	16	0	0	No warnings	100	0	0	0	0	0	0	0	0	0	0	0	0	0	0	0	0	F18
No	587.44	16.539	0.102	6	1	17279	16	0.5	3.04865	No warnings	93.3922	0	1.32248	0	0	0	0	0.793203	3.71792	0	0	0	0.000262775	0.00109424	0.772876	0	0	F46
No	587.44	16.53	0.102	6	1	59962.4	16	0.2	0.994155	No warnings	98.1204	0	0	0.370557	0	0	0	0.00641715	1.04784	0	0	0	8.23923e-05	0.000338225	0.454413	0	0	F45
No	587.44	16.539	0.096	4	1	258129	16	0.1	0.875615	Contaminating mass	90.4929	9.03679	0	0	0	0	2.8371e-05	0.00174073	0.266334	0	0	0	3.89322e-05	0.000160112	0.201963	0	0	F18
No	587.44	16.544	0.093	6	1	147267	16	0.1	0.326094	No warnings	99.3579	0	0	0.113967	0	0	0	0.00259372	0.416698	0	0	0	3.69485e-05	0.00015386	0.108673	0	0	F47
No	587.44	16.5	0.192	6	1	169986	16	0.2	1.10297	Contaminating mass	97.9537	0	0	0	0	0	0.000181401	0.153066	1.67457	0	0	0	1.40139e-05	4.32112e-05	0.0984059	0.119999	0	F17
No	587.44	16.523	0.085	4	1	125377	16	0	0.187833	No warnings	99.6944	0	0	0	0	0	2.38419e-05	0.00146284	0.223817	0	0	0	8.14141e-06	2.52065e-05	7.03814e-05	0.0802004	0	F20
No	587.44	16.512	0.096	5	1	185595	16	0	0.0960401	No warnings	99.8195	0	0	0	0	0	1.76863e-05	0.00108516	0.166031	0	0	0	1.35663e-06	4.20024e-06	1.17279e-05	0.013364	0	F19
No	587.44	16.527	0.084	3	1	614267	16	0	0.00778861	No warnings	99.9844	0	0	0	0	0	1.64978e-06	0.000101224	0.0154874	0	0	0	0	0	0	0	0	F48
No	587.44	16.537	0.092	4	1	372038	16	0.1	0.891346	Contaminating mass	90.6269	8.65957	0	0	0	0	6.68704e-05	0.106062	0.607391	0	0	0	0	0	0	0	0	F4
No	587.44	15.601	0.11	3	1	5892.47	16	0.1	0.749313	No warnings	94.3853	4.55117	0	0	0	0	0.00665612	1.05684	0	0	0	0	0	0	0	0	0	F48
No	587.44	15.588	0.117	2	1	1439.85	16	0	0	No warnings	100	0	0	0	0	0	0	0	0	0	0	0	0	0	0	0	0	F47
No	587.44	15.589	0.116	3	1	3008.43	16	1.1	6.6515	Contaminating mass	86.6879	0	0	0	0	0.000419792	0	0.071197	13.2404	0	0	0	0	0	0	0	0	F17
No	587.44	15.603	0.11	2	1	3773.12	16	0	0.302113	No warnings	95.1662	4.83381	0	0	0	0	0	0	0	0	0	0	0	0	0	0	0	F4
No	587.44	15.57	0.064	3	1	1160.94	16	0.6	3.61466	Contaminating mass	85.1905	8.65834	0	0	0	0.000193977	0	0.0328985	6.11812	0	0	0	0	0	0	0	0	F19
No	587.44	15.591	0.131	3	1	4947.37	16	0.2	1.0639	Contaminating mass	97.8707	0	0	0	0	6.71453e-05	0	0.0113879	2.1178	0	0	0	0	0	0	0	0	F18
No	587.904	17.657	0.062	2	1	2841.76	16	3.1	19.141	Low pattern fit	73.5938	0	0	0	0	0	0	0.00708142	0.0163323	0	19.0556	0	0	0	0	1.71415	5.61296	F45
No	587.904	17.643	0.08	1	1	3859.33	16	5.7	35.8429	Contaminating mass	63.6252	0	0	0	0	0	0	0	0	0	0	0	0	0	0	8.50975	27.865	F20
No	587.904	17.64	0.077	1	1	3372.39	16	15.8	98.5378	Low pattern fit	0	0	0	0	0	0	0	0	0	0	0	0	0	0	0	23.3946	76.6054	F47
No	587.904	17.565	0.129	2	1	7715.31	16	3	18.678	Low pattern fit	71.0949	0	0	0	0	0	0	0.0100929	0.0232778	0	27.1593	0	0	0	0	0.4006	1.31176	F46
No	587.904	17.635	0.052	2	1	9626.9	16	7.1	44.5885	Contaminating mass	30.6698	0	0	0	0	0	0	0.024426	0.0563351	0	65.7288	0	0	0	0	0.823642	2.697	F17
No	587.904	17.624	0.096	2	1	5382.73	16	3	18.8342	Contaminating mass	74.1367	0	0	0	0	0	0	0.00684666	0.0157908	0	18.4239	0	0	0	0	1.73513	5.68166	F19
No	587.904	17.656	0.033	1	1	2399.48	16	0.3	1.88148	Contaminating mass	98.0906	0	0	0	0	0	0	0	0	0	0	0	0	0	0	0.446697	1.4627	F18
No	588.038	2.406	0.101	12	2	12426.8	11	3.7	33.6797	No warnings	4.54523	10.131	16.4877	18.3868	17.857	13.3256	8.89535	5.21674	2.84633	1.61131	0.674671	0.0222579						F46
No	588.038	2.381	0.109	12	2	18458.2	11	3.8	34.393	No warnings	4.26062	10.0364	15.3378	18.433	19.1016	12.3794	8.47233	6.16382	3.22522	1.7264	0.808884	0.0545369						F45
No	588.038	2.36	0.107	8	2	12859.5	11	1.9	17.2574	No warnings	24.1036	22.9872	19.759	15.8019	10.0872	4.49745	2.26093	0.502735	0	0	0	0						F48
No	588.038	2.372	0.136	11	2	18746.8	11	3.6	32.8944	No warnings	4.36034	10.4565	16.474	19.7964	18.6624	12.8221	8.29616	4.44449	3.111	1.25828	0.318343	0						F47
No	588.038	2.369	0.109	3	2	22179.7	11	0	0.186789	No warnings	97.9453	2.05468	0	0	0	0	0	0	0	0	0	0						F17
No	588.038	2.337	0.103	2	2	16340.3	11	0	0.313879	No warnings	96.5473	3.45267	0	0	0	0	0	0	0	0	0	0						F18
No	588.038	2.367	0.115	3	2	16182.7	11	0	0.209785	No warnings	97.6924	2.30763	0	0	0	0	0	0	0	0	0	0						F20
No	588.038	2.353	0.112	3	2	23613.4	11	0	0.232414	No warnings	97.4434	2.55655	0	0	0	0	0	0	0	0	0	0						F19
No	588.316	11.817	0.057	3	3	6927.65	16	0.1	0.801558	No warnings	96.2265	0	0	3.58527	0	0	0	0	0	0	0.00117903	0.187031	0	0	0	0	0	F46
No	588.316	11.814	0.06	3	3	7888.18	16	0.1	0.647894	No warnings	96.5576	0	0	3.43936	0	0	0	0	0	0	0	0	0	0	0	0	0.00301324	F45
No	588.316	11.816	0.057	4	3	7389.08	16	0.1	0.690099	No warnings	96.5493	0	0	3.23264	0	0	0.214563	0	0	0	0	0	0	0	0	0	0.00351721	F48
No	588.316	11.82	0.06	3	3	7602.5	16	0.2	1.04	Irregular exchange	94.4617	0	0	5.53642	0	0	0	0	0	0	0	0	0	0	0	0	0.00192573	F47
No	588.316	11.821	0.059	3	3	8276.77	16	0.2	1.14082	Contaminating mass	93.9412	0	0	6.0529	0	0	0	0	0	0	0	0	0	0	0	0	0.00590183	F17
No	588.316	11.816	0.058	3	3	6847.34	16	0.2	1.54938	Contaminating mass	92.7905	0	0	6.81406	0	0	0	0	0	0	0.00247748	0.393006	0	0	0	0	0	F4
No	588.316	11.818	0.061	4	3	7859.58	16	0.2	0.961432	Contaminating mass	96.9514	0	0	2.52871	0	0	0	0	0	0	0	0	4.5461e-06	0	0.00165937	0.518233	0	F19
No	588.316	11.822	0.062	3	3	8363.47	16	0.4	2.20428	Contaminating mass	88.2592	0	0	11.7372	0	0	0	0	0	0	0	0	0	0	0	0	0.0035553	F20
No	588.316	11.816	0.059	3	3	7873.32	16	0.2	1.08105	Contaminating mass	94.2558	0	0	5.73921	0	0	0	0	0	0	0	0	0	0	0	0	0.00494271	F18
No	588.347	16.803	0.039	1	1	20918.5	16	16	99.9906	Contaminating mass	0	0	0	0	0	0	0	0	0	0	0	0	0	0.0168036	0.0499769	0	99.9332	F20
No	588.347	16.721	0.033	1	1	4471.89	16	16	99.9855	Low pattern fit	0.00514637	0	0	0	0	0	0	0	0	0	0	0	0	0.0168027	0.0499743	0	99.9281	F45
No	588.347	16.847	0.025	2	1	11694.3	16	15.6	97.2779	No warnings	0	0.00174606	0.00146745	0	1.4132	0	0	0	0	0	0	0	0	0.00568313	0.0169027	26.4975	72.0635	F46
No	588.347	16.791	0.075	1	1	19368.4	16	15.3	95.7121	Low pattern fit	0.0573416	0	0	0.00203432	0	2.67647	0	0	0	0	0	0	0	0	0	38.2206	59.0436	F48
No	588.347	16.646	0.132	1	1	14087.4	16	15.6	97.2276	Low pattern fit	0	0	0	0	0	0	0	0	0	0	0	0	0	0	0	44.3589	55.6411	F47
No	588.347	16.794	0.092	1	1	14624.2	16	14.6	91.5432	Contaminating mass	0	0.00986791	0.00829332	0	7.98674	0	0	0	0	0	0	0.049868	0	0	0	38.9547	52.9906	F17
No	588.347	16.76	0.076	1	1	91627.3	16	13.4	83.8856	Contaminating mass	9.77511	0	0	0	4.85946	0	0	0	0.706213	0	0	0.27035	0	0	0	36.1143	48.2746	F4
No	588.347	16.645	0.22	1	1	30776.4	16	15.4	96.5242	Contaminating mass	0.00808976	0.00138664	0.00116538	0	1.1223	0	0	0	0	0	0	0.00333172	0	0	0	41.9624	56.9013	F19
No	588.347	16.78	0.061	1	1	20603.4	16	15.5	96.7389	Contaminating mass	0	0	0.00958848	0	0	0.866912	0	0	0	0	0	0	0	0	0	42.5074	56.6161	F18
No	588.382	16.644	0.03	2	2	4206.45	16	4.2	26.3855	Contaminating mass	0	0.00595004	0	1.66296	95.8205	0.461492	0	0	0	0	0	0	5.57185e-05	0.000135077	0.00135175	1.19866	0.848941	F19
No	588.382	16.74	0.076	2	2	3472.28	16	4.1	25.3863	No warnings	0.0117836	0.752617	0.000359715	1.8362	91.0234	2.42904	3.94665	0	0	0	0	0	0	0	0	0	0	F46
No	588.382	16.768	0.053	1	2	1966.11	16	4.4	27.6395	Contaminating mass	0	0	0.00431658	1.96853	53.8182	44.209	0	0	0	0	0	0	0	0	0	0	0	F20
No	588.382	16.809	0.162	1	2	11923.4	16	4	24.7178	No warnings	0.805846	0.00820531	0	1.26694	97.919	0	0	0	0	0	0	0	0	0	0	0	0	F48
No	588.382	16.788	0.021	1	2	2249.9	16	4.5	27.9075	No warnings	0	0.00464529	0	0.556838	52.3482	47.0903	0	0	0	0	0	0	0	0	0	0	0	F47
No	588.382	16.673	0.023	2	2	5716.77	16	3.5	21.8084	Contaminating mass	6.88955	0	0	23.5066	69.6038	0	0	0	0	0	0	0	0	0	0	0	0	F17
No	588.382	16.703	0.051	3	2	9649.1	16	2.5	15.4408	Contaminating mass	38.5229	0	0	0.288899	60.8297	0	0	0	0.358524	0	0	0	0	0	0	0	0	F4
No	588.382	16.746	0.112	1	2	9166.68	16	4	24.9409	Contaminating mass	0	0.00398539	0	0.934196	99.0618	0	0	0	0	0	0	0	0	0	0	0	0	F18
No	588.386	15.953	0.11	5	1	9350.22	16	1.9	11.9277	Irregular exchange	85.3339	0	0	0	0	0	0	0	0	0	0.000420685	0.00199039	1.97106	11.7	0	0.817877	0.174798	F48
No	588.386	15.96	0.076	7	1	16280.4	16	2.4	14.7396	Contaminating mass	69.0102	14.005	0	0	0	0.000167085	0.233934	0.531301	0	0	0	0.000995853	5.57576	4.92745	0	5.71524	0	F4
No	588.386	15.984	0.09	4	1	12317.1	16	0.3	2.05623	Contaminating mass	97.6155	0	0	0	0	0	0	0	0	0	4.49398e-05	6.49724e-05	0	1.43356	0	0.950808	0	F19
No	588.386	15.972	0.087	7	1	11094.7	16	0.8	4.76829	Irregular exchange	90.5623	0	0	0	0	4.05438e-05	5.38358	1.66919	0.204024	0	0	0	0	1.01948	0	1.16141	0	F47
No	588.386	16.019	0.072	6	1	15343.1	16	1.6	9.921	Contaminating mass	70.3469	0	0	0	0.0398533	27.8185	0	0.334773	0	0.337282	0	0	0.490076	0.632649	0	0	0	F20
No	588.386	15.974	0.111	6	1	10534.3	16	0.4	2.30542	No warnings	79.0154	19.583	0	0	0	6.07205e-05	0.181443	0.176533	0	0	0	1.66448e-05	0	0.337415	0	0.706166	0	F45
No	588.386	15.949	0.09	8	1	20843.1	16	1.6	10.3057	Contaminating mass	66.0571	13.0045	0	0	0	14.4442	0	1.02741	0	0	0	0.000146622	3.02742	0.299829	0	1.98454	0.154811	F17
No	588.386	15.971	0.096	7	1	9467.62	16	0.5	2.95603	No warnings	82.8259	12.4956	0	0	0	1.27229	0	2.43847	0.233889	0	0	0	0.560718	0	0	0	0.173159	F46
No	588.386	15.939	0.086	5	1	15559.2	16	1.6	9.70617	Contaminating mass	84.8671	3.04131	0	0	0	0.000547897	0.00108675	1.87367	0	0	0	0	4.70392	0	0	5.51236	0	F18
No	588.393	16.358	0.049	2	1	1434.46	16	5.2	32.2392	Irregular exchange	1.06071	61.0166	0	0	0	0	0	0	0	0.0038633	0	0.24975	37.669	0	0	0	0	F46
No	588.393	16.234	0.054	2	1	3977.63	16	0.2	0.961184	No warnings	84.6211	15.3789	0	0	0	0	0	0	0	0	0	0	0	0	0	0	0	F48
No	588.393	16.233	0.037	2	1	2358.04	16	0.5	2.95929	No warnings	52.6514	47.3486	0	0	0	0	0	0	0	0	0	0	0	0	0	0	0	F47
No	588.393	16.229	0.038	1	1	1063.26	16	0	0	No warnings	100	0	0	0	0	0	0	0	0	0	0	0	0	0	0	0	0	F4
No	588.393	16.328	0.063	2	1	4325.06	16	5.1	31.6796	Contaminating mass	1.27391	61.5985	0	0	0	0	0	0	0	0.0037823	0	0.244513	36.8793	0	0	0	0	F19
No	588.393	16.235	0.035	1	1	1141.34	16	0	0	No warnings	100	0	0	0	0	0	0	0	0	0	0	0	0	0	0	0	0	F18
No	588.401	17.951	0.054	1	1	9290.33	16	0	0	No warnings	100	0	0	0	0	0	0	0	0	0	0	0	0	0	0	0	0	F4
No	588.422	16.907	0.047	3	1	3994.51	16	0.6	3.95072	No warnings	66.3115	31.227	0	0	0	0	0	0	0	0	0	0	0.0149886	2.44651	0	0	0	F45
No	588.422	16.668	0.04	6	1	105144	16	6.4	39.7259	Irregular exchange	23.501	7.86274	0	0	0	0	0	0	0.183297	62.2545	2.18806	4.01044	0	0	0	0	0	F46
No	588.422	16.804	0.054	5	1	97064.1	16	1.4	8.74902	Irregular exchange	74.7162	7.08964	0	0	6.16429	0	0	0	0.031462	11.9984	0	0	0	0	0	0	0	F48
No	588.422	16.795	0.048	3	1	35599.9	16	0	0.0698979	No warnings	99.4408	0	0.559183	0	0	0	0	0	0	0	0	0	0	0	0	0	0	F47
No	588.422	16.811	0.068	5	1	108882	16	3.7	23.0947	Contaminating mass	57.4378	0.908483	0.472945	0	0.55728	0	0	0	0.180144	40.4434	0	0	0	0	0	0	0	F18
No	588.422	16.797	0.063	5	1	191518	16	3	18.4559	Contaminating mass	66.3964	0	0.438587	0	0.792559	0	0	0	0.105973	32.2665	0	0	0	0	0	0	0	F4
No	588.422	16.809	0.072	6	1	90459	16	4.1	25.4229	Contaminating mass	53.6531	0	0.853638	0	0.861858	0	0	0	0.0714169	44.56	0	0	0	0	0	0	0	F17
No	588.422	16.749	0.057	1	1	8901.6	16	0	0	No warnings	100	0	0	0	0	0	0	0	0	0	0	0	0	0	0	0	0	F20
No	588.422	16.801	0.062	3	1	31494.8	16	0	0.158352	No warnings	98.7332	0	1.26682	0	0	0	0	0	0	0	0	0	0	0	0	0	0	F19
No	588.422	16.164	0.057	2	1	2667.25	16	9.2	57.5381	No warnings	0	0	0	0	0	0	0	0	0	79.3912	20.6088	0	0	0	0	0	0	F48
No	588.422	16.146	0.056	4	1	4990.84	16	8.1	50.463	Irregular exchange	10.5975	0	0	0	0.0445356	2.7351	0	0	0.359602	71.9548	14.3084	0	0	0	0	0	0	F47
No	588.422	16.163	0.026	3	1	18391.8	16	7.2	44.9399	Contaminating mass	7.34583	14.317	0	0	0	0	0	0	0.312398	78.0248	0	0	0	0	0	0	0	F18
No	588.422	16.189	0.03	4	1	15260.8	16	6.3	39.6828	Contaminating mass	14.1632	18.0106	0	0	0	0	0	0	0	61.3472	6.47901	0	0	0	0	0	0	F4
No	588.422	16.175	0.086	5	1	11183.2	16	5.7	35.9268	Contaminating mass	23.8879	13.645	0	0	1.01831	0	0	0	0	57.3779	4.07088	0	0	0	0	0	0	F17
No	588.422	16.133	0.119	3	1	6437.22	16	7.2	45.2316	Contaminating mass	0.518433	21.4276	0	0	0	0	0	0	0.208163	77.8458	0	0	0	0	0	0	0	F19
No	588.424	16.229	0.044	3	1	1527.7	16	4.1	25.3863	Irregular exchange	52.3442	0	0	0	0	0.00566177	0	0.418798	42.1573	0	0	0	0	5.07407	0	0	0	F46
No	588.424	16.24	0.735	3	1	30198.9	16	10.2	63.8346	Irregular exchange	6.68505	0	0	0	0	0	0	0.0182422	1.55815	0	0.362997	91.3756	0	0	0	0	0	F48
No	588.424	16.227	0.047	2	1	2290.75	16	0.9	5.38665	Contaminating mass	78.4534	0	0	0	21.5466	0	0	0	0	0	0	0	0	0	0	0	0	F17
No	588.424	16.253	0.077	3	1	20300.2	16	6.6	41.366	Contaminating mass	24.8281	0	0	0	23.5394	0	0	0	0	0	0.258805	51.3737	0	0	0	0	0	F4
No	588.424	16.223	0.066	2	1	4960.07	16	1.9	11.6896	Contaminating mass	76.5908	0	0	0	0	0.00311254	0	0.230233	23.1758	0	0	0	0	0	0	0	0	F18
No	588.439	16.286	0.029	3	1	1172.53	16	1.2	7.27486	Contaminating mass	85.2508	0	0	0	0	0.105166	11.142	0	0	0	0	4.37825e-05	0	0.00897028	3.49307	0	0	F17
No	588.439	16.303	0.043	2	1	1888.14	16	0.3	2.16755	Contaminating mass	97.5223	0	0	0	0	0	0	0	0	0	0	3.09754e-05	0	0.00634631	2.47128	0	0	F19
No	588.444	16.402	0.097	4	1	8207.12	16	1.5	9.34999	Contaminating mass	8.62932	84.2313	0	0	0	4.8727e-06	0.0211788	4.54865	0	0	0	0.000381748	0.00236285	2.5668	0	0	0	F18
No	588.444	16.425	0.061	4	1	9062.06	16	0.3	1.99864	No warnings	96.1417	0	0	0	0.000340686	0	0.0140692	3.02474	0	0	0	6.9751e-06	2.57064e-05	0.748464	0.0706311	0	0	F45
No	588.444	16.426	0.079	4	1	21293.5	16	0.1	0.744234	No warnings	98.6272	0	0	0	0.000110855	0	0.00457793	0.984212	0	0	0	5.7036e-05	0.000353027	0.383499	0	0	0	F47
No	588.444	16.393	0.077	4	1	14596	16	0.9	5.41713	Low pattern fit	16.0908	83.5982	0	0	0	0.000762818	0.137261	0	0	0	7.71961e-06	2.41379e-05	0.000159127	0.172786	0	0	0	F48
No	588.444	16.519	0.133	3	1	35700.3	16	0.1	0.461867	No warnings	99.1095	0	0	0	8.12415e-05	0	0.003355	0.721292	0	0	0	6.29803e-06	2.3518e-05	9.16344e-05	0.165631	0	0	F20
No	588.444	16.492	0.211	3	1	55004.5	16	0.2	1.38019	Contaminating mass	96.8669	0	0	0	0.000335422	0	0.133726	2.95812	0	0	0	1.55383e-06	5.80228e-06	2.26078e-05	0.040864	0	0	F19
No	588.444	16.419	0.089	2	1	10898.7	16	1.5	9.68412	Contaminating mass	0.586884	88.2943	0	0	0	0.0614508	11.0574	0	0	0	0	0	0	0	0	0	0	F4
No	588.886	16.973	0.034	1	1	1000.95	10	0	0	No warnings	100	0	0	0	0	0	0	0	0	0	0							F48
No	588.886	16.969	0.055	2	1	1431.65	10	0	0	No warnings	100	0	0	0	0	0	0	0	0	0	0							F4
No	588.886	16.964	0.075	2	1	1603.18	10	0	0.484762	No warnings	95.1524	4.84762	0	0	0	0	0	0	0	0	0							F19
No	588.886	16.977	0.051	2	1	1190.36	10	0	0.139601	No warnings	98.604	1.39601	0	0	0	0	0	0	0	0	0							F18
No	588.895	15.87	0.055	3	1	1511.18	16	1.8	11.0296	Contaminating mass	70.3166	0	0	0.542067	0	0	29.1413	0	0	0	0	0	0	0	0	0	0	F19
No	588.896	16.349	0.067	4	1	1341.39	16	2	12.803	Irregular exchange	82.1709	0	0	1.01121	0	0	0	0	0	0.000219434	0.000113126	0	16.8175	0	0	0	0	F46
No	588.896	16.352	0.066	3	1	2667.43	16	2.1	12.8772	Irregular exchange	76.2932	0.00034647	0	1.94593	0	0	10.1549	0	0	0.000151426	7.80657e-05	0	11.6054	0	0	0	0	F45
No	588.896	16.357	0.058	5	1	7732.95	16	1.9	12.0814	Irregular exchange	72.8593	0.673845	0	3.05	0	0	16.2539	0	0	0	5.66544e-05	0	7.16288	0	0	0	0	F48
No	588.896	16.351	0.058	3	1	4208.76	16	3.4	20.9706	Irregular exchange	54.8509	0.868946	0	1.52844	0.00181232	0	30.4884	0	0	0.000159984	8.24773e-05	0	12.2613	0	0	0	0	F47
No	588.896	16.347	0.063	4	1	3740.85	16	0.4	2.6657	Contaminating mass	89.6834	2.00041	0	3.08211	0	0	5.23406	0	0	0	0	0	0	0	0	0	0	F17
No	588.896	16.349	0.059	4	1	6385.17	16	0.6	3.67379	Contaminating mass	88.7462	0	0	2.91401	0	0	8.33978	0	0	0	0	0	0	0	0	0	0	F4
No	588.896	16.341	0.062	5	1	3972.9	16	2.9	18.1084	Contaminating mass	74.485	1.04077	0	0.348153	0	0	0	0	0	0.620921	0	0	23.5051	0	0	0	0	F19
No	588.896	16.341	0.062	5	1	2672.55	16	3.1	19.5595	Contaminating mass	56.0342	0	0	1.26844	0	0	33.8701	0	0	0	6.98182e-05	0	8.82719	0	0	0	0	F20
No	588.896	16.349	0.065	5	1	6018.79	16	2.5	15.5943	Contaminating mass	68.8942	1.97833	0	2.11667	0	0	13.8249	0	0	0	0.000104293	0	13.1858	0	0	0	0	F18
No	588.938	16.716	0.157	1	1	13862.6	13	0.1	0.489918	Low pattern fit	98.4542	0	0	0	1.35989	0.185878	0	0	0	0	0	0	0	0				F46
No	588.938	16.652	0.09	1	1	13016.5	13	0	0.147421	Low pattern fit	99.5379	0	0	0	0.39417	0.0679586	0	0	0	0	0	0	0	0				F45
No	588.938	16.854	0.043	1	1	37967.7	13	0.6	4.27102	Irregular exchange	73.0643	17.6332	0	0	8.6225	0.680005	0	0	0	0	0	0	0	0				F48
No	588.938	16.65	0.034	1	1	24297.5	13	0	0.0378791	No warnings	99.8788	0	0	0	0.113449	0.00772633	0	0	0	0	0	0	0	0				F47
No	588.938	16.778	0.04	1	1	44862.7	13	0.7	5.60501	Contaminating mass	52.0527	39.9663	0	0	7.00638	0.974266	0.000336131	0	0	0	0	0	0	0				F17
No	588.938	16.638	0.017	1	1	47223.2	13	0.9	6.84028	Contaminating mass	45.6505	43.2186	0	0	10.072	0.936176	0.122712	0	0	0	0	0	0	0				F18
No	588.938	16.774	0.08	1	1	58283.9	13	1.4	10.7591	Contaminating mass	37.8343	37.9403	0	0	19.1994	5.02604	0	0	0	0	0	0	0	0				F4
No	588.938	16.638	0.046	1	1	21073.7	13	0	0.115566	No warnings	99.4558	0.23484	0	0	0.279074	0.0302447	0	0	0	0	0	0	0	0				F20
No	588.938	16.659	0.387	1	1	36680.9	13	0.1	0.595299	No warnings	93.4022	6.36956	0	0	0	0	0.22822	0	0	0	0	0	0	0				F19
No	589.012	17.148	0.025	3	1	5876.24	13	6	46.2432	Contaminating mass	50.6379	0	0	0	0	0	0	0	0	0	0.00126688	0.00144674	40.5384	8.82097				F19
No	589.012	17.131	0.029	3	1	2097.48	13	1.2	9.27973	Irregular exchange	85.0904	6.09903	0	0	0	0	0	0	0	0	2.07558e-05	9.22508e-05	0	8.81048				F45
No	589.012	17.142	0.039	3	1	4718.72	13	2.8	21.5116	Contaminating mass	74.1508	3.2278	0	0	0	0	0	0	0	0	0.000581149	0.000686368	17.6512	4.96888				F20
No	589.012	17.172	0.022	2	1	6971.07	13	4.1	31.6974	Irregular exchange	65.661	0	0	0	0	0	0	0	0	0.000148339	0.000206906	0	34.3386	0				F48
No	589.012	17.168	0.021	2	1	3189.84	13	5.3	40.4772	Irregular exchange	56.1496	0	0	0	0	0	0	0	0	0.000189427	0.000264217	0	43.85	0				F47
No	589.012	17.168	0.049	2	1	2083.85	13	2.1	16.3372	Contaminating mass	82.3013	0	0	0	0	0	0	0	0	7.64555e-05	0.000106642	0	17.6985	0				F17
No	589.012	17.161	0.032	2	1	4218.36	13	5.1	39.0051	Contaminating mass	57.7443	0	0	0	0	0	0	0	0	0.000182538	0.000254608	0	42.2552	0				F4
No	589.012	17.163	0.014	2	1	4917.03	13	5.5	42.5507	Contaminating mass	53.9034	0	0	0	0	0	0	0	0	0.00019913	0.000277751	0	46.0962	0				F18
No	589.12	3.737	0.071	7	1	4084.45	16	13.5	84.1326	No warnings	0	0	0	0	0	0	0	0	0	0	11.2944	6.70166	6.7232	23.7861	18.4748	17.404	15.6159	F46
No	589.12	3.695	0.027	7	1	2104.11	16	12	75.1875	No warnings	0	0	0	0	0	0	0	0	0	3.91656e-06	17.7706	25.5215	17.4462	23.4666	9.05086	4.48352	2.26076	F48
No	589.12	3.689	0.077	7	1	5722.36	16	13.7	85.3633	No warnings	0	0	0	0	0	0	0	0	0	0	0.641894	13.3693	9.39507	23.1955	19.6209	17.0812	16.6962	F45
No	589.12	3.673	0.088	7	1	5156.48	16	13.5	84.2791	No warnings	0	0	0	0	0	0	0	0	0	0	3.49828	11.9139	15.9265	17.8146	18.6739	16.4771	15.6958	F47
No	589.12	3.692	0.084	7	1	6440.15	16	1.6	10.0749	Contaminating mass	80.9272	0	0	0	0	0	0	4.43813	12.1462	0	0	1.30917	0	0	0	0.3066	0.872625	F17
No	589.12	3.68	0.094	7	1	7590.1	16	1.6	9.84481	Contaminating mass	80.8687	0	0	0	0	0	0	5.75392	11.0121	0	0	1.73864	0	0	0	0.00872377	0.617919	F19
No	589.12	3.692	0.08	5	1	4826.81	16	1.4	8.54493	Contaminating mass	82.9666	0	0	0	0	0	0	3.97157	11.5874	0	0	1.47441	0	0	0	0	0	F20
No	589.12	3.685	0.081	4	1	3115.83	16	0.8	4.81404	Contaminating mass	89.2238	0	0	0	0	0	0	9.18493	1.59127	0	0	0	0	0	0	0	0	F18
No	589.332	8.671	0.055	2	1	1047.93	16	1	6.3909	Contaminating mass	91.4783	0	0	0	0	0	0	0	0	0.00105569	0.00139277	0	8.51925	0	0	0	0	F19
No	589.332	7.802	0.051	2	2	10287.3	16	0	0.170143	No warnings	98.6389	0	1.36115	0	0	0	0	0	0	0	0	0	0	0	0	0	0	F46
No	589.332	7.803	0.05	2	2	11590	16	0	2.7438e-05	No warnings	99.9998	0	0.000219504	0	0	0	0	0	0	0	0	0	0	0	0	0	0	F45
No	589.332	7.803	0.05	2	2	21746.6	16	0	0	No warnings	100	0	0	0	0	0	0	0	0	0	0	0	0	0	0	0	0	F48
No	589.332	7.801	0.049	3	2	12887.8	16	0	0.180116	No warnings	98.7131	0	1.20982	0	0	0	0.0770357	0	0	0	0	0	0	0	0	0	0	F47
No	589.332	7.802	0.052	2	2	21345.5	16	0	0.00860067	No warnings	99.9312	0	0.0688054	0	0	0	0	0	0	0	0	0	0	0	0	0	0	F17
No	589.332	7.801	0.05	2	2	12558.4	16	0	0.00629564	No warnings	99.9496	0	0.0503651	0	0	0	0	0	0	0	0	0	0	0	0	0	0	F18
No	589.332	7.802	0.048	4	2	4307.95	16	1.1	7.09937	Contaminating mass	72.1575	0	0	0	25.8008	1.86374	0.178029	0	0	0	0	0	0	0	0	0	0	F4
No	589.332	7.801	0.052	2	2	8919.16	16	0	0.113706	No warnings	99.0903	0	0.909651	0	0	0	0	0	0	0	0	0	0	0	0	0	0	F20
No	589.332	7.8	0.049	2	2	22816.3	16	0	0.0265696	No warnings	99.7874	0	0.212557	0	0	0	0	0	0	0	0	0	0	0	0	0	0	F19
No	589.332	8.318	0.054	3	1	4015.21	16	0	0.234474	No warnings	99.6873	0	0	0	0	0	0	0	0	4.39549e-06	0	0.000445998	0.31222	0	0	0	0	F48
No	589.332	8.318	0.053	1	1	1016.05	16	0	0	No warnings	100	0	0	0	0	0	0	0	0	0	0	0	0	0	0	0	0	F47
No	589.332	8.318	0.06	2	1	2656.16	16	0	0	No warnings	100	0	0	0	0	0	0	0	0	0	0	0	0	0	0	0	0	F17
No	589.332	8.32	0.043	2	1	1834.03	16	0	0	No warnings	100	0	0	0	0	0	0	0	0	0	0	0	0	0	0	0	0	F18
No	589.332	8.318	0.056	2	1	2623.27	16	0	0	No warnings	100	0	0	0	0	0	0	0	0	0	0	0	0	0	0	0	0	F19
No	589.333	8.482	0.043	2	1	1766.45	16	0	0	No warnings	100	0	0	0	0	0	0	0	0	0	0	0	0	0	0	0	0	F47
No	589.333	8.489	0.039	2	1	3781.37	16	0	0	No warnings	100	0	0	0	0	0	0	0	0	0	0	0	0	0	0	0	0	F17
No	589.369	8.15	0.043	1	1	1267.41	16	0	0	No warnings	100	0	0	0	0	0	0	0	0	0	0	0	0	0	0	0	0	F48
No	589.369	8.129	0.083	1	1	1853.53	16	0	0	No warnings	100	0	0	0	0	0	0	0	0	0	0	0	0	0	0	0	0	F17
No	589.369	8.151	0.044	1	1	1153.91	16	0	0	No warnings	100	0	0	0	0	0	0	0	0	0	0	0	0	0	0	0	0	F19
No	589.371	8.947	0.052	2	1	1139.8	16	0	0	No warnings	100	0	0	0	0	0	0	0	0	0	0	0	0	0	0	0	0	F4
No	589.383	14.259	0.034	5	1	6829	16	4.1	25.8127	Contaminating mass	0.367151	38.2382	0	40.2864	0.0526568	0	0	0	0	0	0.000428573	0.000599361	20.0255	1.02908	0	0	0	F19
No	589.383	14.266	0.051	4	1	8558.9	16	0.2	1.1345	No warnings	98.4663	0	0	0.0275936	0	0	0	0	0	0.00011056	0.000117535	0.00340614	1.50246	0	0	0	0	F46
No	589.383	14.265	0.032	6	1	11739.4	16	0.9	5.4914	Irregular exchange	80.0241	9.8892	0	4.81592	0	0	0	0	0	2.47224e-05	0.000144519	0.0019441	5.19905	0	0	0	0.0696124	F45
No	589.383	14.266	0.031	4	1	10134.4	16	3.2	19.7588	Low pattern fit	44.9357	21.766	0	11.686	0	0	0	0	0	0.000754848	0.00107785	0.0260093	21.5844	0	0	0	0	F48
No	589.383	14.266	0.043	5	1	6165.48	16	0	0.0999979	No warnings	99.3799	0	0.266559	0.347298	0.00623801	0	0	0	0	0	0	0	0	0	0	0	0	F47
No	589.383	14.264	0.046	5	1	10244.3	16	0.4	2.72399	Contaminating mass	93.5324	1.36162	0	2.11525	0	0	0	0	0	0.00033835	0.000320354	0.0100305	2.98	0	0	0	0	F17
No	589.383	14.289	0.018	2	1	1735.59	16	0.3	1.99105	Contaminating mass	68.1432	31.8568	0	0	0	0	0	0	0	0	0	0	0	0	0	0	0	F20
No	589.383	14.275	0.036	5	1	7359.02	16	3.5	21.8189	Contaminating mass	50.2032	16.5738	0	7.3464	0	0	0	0	0	0.000719965	0.00115596	0.0260868	25.8486	0	0	0	0	F18
No	589.384	11.422	0.051	3	1	1587.41	16	0.9	5.76717	Irregular exchange	88.4603	0	0	0	0	0.00331506	0	0.0332741	11.5032	0	0	0	0	0	0	0	0	F46
No	589.384	11.421	0.058	3	1	2042.14	16	0.9	5.4748	Contaminating mass	89.0453	0	0	0	0	0.00314701	0	0.0315873	10.92	0	0	0	0	0	0	0	0	F20
No	589.384	11.425	0.05	3	1	2773.04	16	0.6	3.93892	Irregular exchange	92.1185	0	0	0	0	0.00226415	0	0.0227259	7.85654	0	0	0	0	0	0	0	0	F45
No	589.384	11.423	0.064	3	1	2047.18	16	0.6	3.53947	Irregular exchange	92.9177	0	0	0	0	0.00203455	0	0.0204212	7.0598	0	0	0	0	0	0	0	0	F48
No	589.384	11.425	0.051	3	1	1536.01	16	0.9	5.7805	Irregular exchange	88.4336	0	0	0	0	0.00332272	0	0.033351	11.5297	0	0	0	0	0	0	0	0	F47
No	589.384	11.424	0.051	3	1	4038.99	16	0.5	2.93058	Contaminating mass	94.1368	0	0	0	0	0.00128844	0	0.0125391	5.84938	0	0	0	0	0	0	0	0	F17
No	589.384	11.425	0.056	3	1	1675.9	16	0.9	5.3439	Contaminating mass	89.3094	0	0	0	0	0.00180923	0	0.0169062	10.6719	0	0	0	0	0	0	0	0	F19
No	589.384	11.425	0.048	3	1	1757.77	16	0.7	4.24316	Contaminating mass	91.511	0	0	0	0	0.00167836	0	0.0160909	8.4712	0	0	0	0	0	0	0	0	F18
No	589.402	14.912	0.047	2	1	1166.32	16	2	12.2326	Contaminating mass	0	8.81506	86.6475	4.53743	0	0	0	0	0	0	0	0	0	0	0	0	0	F20
No	589.402	14.922	0.032	3	1	1591.78	16	1.6	9.87952	Irregular exchange	20.621	0.68563	78.6933	0	0	0	0	0	0	0	0	0	0	0	0	0	0	F47
No	589.402	14.912	0.04	1	1	2703.45	16	2	12.2316	Low pattern fit	0	4.29486	95.7051	0	0	0	0	0	0	0	0	0	0	0	0	0	0	F48
No	589.402	14.913	0.039	3	1	1796.84	16	1.6	9.89864	Contaminating mass	20.8109	0	79.1891	0	0	0	0	0	0	0	0	0	0	0	0	0	0	F19
No	589.402	14.889	0.108	1	1	3103.59	16	2	12.4532	Contaminating mass	0	0.749537	99.2505	0	0	0	0	0	0	0	0	0	0	0	0	0	0	F18
No	589.406	10.226	0.071	2	1	1806.68	16	0	0	No warnings	100	0	0	0	0	0	0	0	0	0	0	0	0	0	0	0	0	F46
No	589.406	10.23	0.077	2	1	1659.77	16	0	0	No warnings	100	0	0	0	0	0	0	0	0	0	0	0	0	0	0	0	0	F45
No	589.406	10.228	0.077	3	1	6019.28	16	0	0	No warnings	100	0	0	0	0	0	0	0	0	0	0	0	0	0	0	0	0	F48
No	589.406	10.226	0.076	2	1	1755.14	16	0	0	No warnings	100	0	0	0	0	0	0	0	0	0	0	0	0	0	0	0	0	F47
No	589.406	10.226	0.076	3	1	6913.99	16	0	0	No warnings	100	0	0	0	0	0	0	0	0	0	0	0	0	0	0	0	0	F17
No	589.406	10.229	0.074	4	1	9414.71	16	0	0	No warnings	100	0	0	0	0	0	0	0	0	0	0	0	0	0	0	0	0	F4
No	589.406	10.227	0.067	2	1	1284.24	16	0	0	No warnings	100	0	0	0	0	0	0	0	0	0	0	0	0	0	0	0	0	F20
No	589.406	10.229	0.075	3	1	12637.1	16	0	0	No warnings	100	0	0	0	0	0	0	0	0	0	0	0	0	0	0	0	0	F18
No	589.406	10.226	0.077	3	1	5796.36	16	0	0	No warnings	100	0	0	0	0	0	0	0	0	0	0	0	0	0	0	0	0	F19
No	589.419	14.212	0.012	4	1	1158.09	16	7.1	44.5364	Irregular exchange	8.04114	3.00432	0	0	0	0.00601405	0	2.04009	86.9084	0	0	0	0	0	0	0	0	F48
No	589.419	14.228	0.153	4	1	3018.06	16	7.6	47.1966	Contaminating mass	5.48844	0	0	0	0	0	0.00163519	12.5967	70.2603	11.653	0	0	0	0	0	0	0	F17
No	589.419	14.212	0.038	3	1	3511.3	16	4.7	29.37	Contaminating mass	41.0988	0.169612	0	0	0	0.00155553	0	0.0969646	58.633	0	0	0	0	0	0	0	0	F4
No	589.419	14.245	0.124	3	1	2031.98	16	8	50.2519	Contaminating mass	0.0111617	0.940372	0	0	0	0	0.00159158	0	88.3416	10.7053	0	0	0	0	0	0	0	F19
No	589.42	14.961	0.068	3	1	25621.9	16	0.2	1.433	No warnings	97.451	0	0	0	0	0	0.000371478	3.45024e-05	0.0121758	2.53645	0	0	0	0	0	0	0	F46
No	589.42	14.963	0.068	3	1	35747.3	16	0.1	0.639854	No warnings	98.8618	0	0	0	0	0	0.00016587	1.54058e-05	0.00543669	1.13256	0	0	0	0	0	0	0	F45
No	589.42	14.958	0.071	4	1	83390.7	16	0.1	0.929558	No warnings	98.2312	0	0	0	0.207709	0	0	0	0.007474	1.55359	0	0	0	0	0	0	0	F48
No	589.42	14.958	0.072	2	1	27852.7	16	0	0	No warnings	100	0	0	0	0	0	0	0	0	0	0	0	0	0	0	0	0	F47
No	589.42	14.958	0.07	3	1	76751.8	16	0	0	No warnings	100	0	0	0	0	0	0	0	0	0	0	0	0	0	0	0	0	F18
No	589.42	14.963	0.068	6	1	150078	16	0.2	1.47108	Contaminating mass	97.1523	0	0	0	0	0	0.000164208	1.3382e-05	2.09165	0.755888	0	0	0	0	0	0	0	F4
No	589.42	14.947	0.071	4	1	54532	16	0.1	0.842116	Contaminating mass	96.4492	2.21886	0	0	0	0	0.000106563	9.24493e-06	0.731672	0.600101	0	0	0	0	0	0	0	F17
No	589.42	14.943	0.07	6	1	31773.1	16	0.4	2.49906	Contaminating mass	95.2635	0	0	0	0	0	0.00038284	0.08895	2.46476	2.18244	0	0	0	0	0	0	0	F20
No	589.42	14.951	0.069	4	1	52635.4	16	0.1	0.408479	No warnings	99.2676	0	0	0	0.0104607	0	0	0	0.00345638	0.718463	0	0	0	0	0	0	0	F19
No	589.425	16.841	0.103	3	1	1989.02	16	1.8	11.277	Irregular exchange	0.753292	77.2128	0	12.7547	0	0	0	9.27928	0	0	0	0	0	0	0	0	0	F46
No	589.425	16.808	0.083	4	1	7848.53	16	1.4	8.45424	Irregular exchange	86.9748	0	0	0	0.000259073	0.000180082	0.00797685	1.99002	0	0	0.00620132	11.0205	0	0	0	0	0	F45
No	589.425	16.789	0.067	5	1	31840.8	16	5	31.1117	Irregular exchange	47.8663	0	0	5.97962	0.445709	0	0	0	0.00177676	0.00489692	24.7113	20.9904	0	0	0	0	0	F48
No	589.425	16.798	0.067	6	1	48130.4	16	6.7	41.8082	Irregular exchange	20.8535	4.53628	0.0735626	12.5892	0	0	0	0.643345	0.000190687	0.000514058	52.3671	8.9363	0	0	0	0	0	F47
No	589.425	16.542	0.017	5	1	64843.5	16	7.6	47.7264	Contaminating mass	21.4371	0.736233	0.00962277	4.27701	0.000143023	0.000166705	0.00682624	1.70682	0.00679546	0.0580241	51.9038	19.8574	0	0	0	0	0	F17
No	589.425	16.807	0.074	4	1	125368	16	6.3	39.6606	Contaminating mass	33.6647	0	0.0181344	5.87921	0.0199086	0	0	0.749386	0.00852267	0.0852878	44.5885	14.9864	0	0	0	0	0	F18
No	589.425	16.797	0.067	5	1	139691	16	6.9	42.8474	Contaminating mass	30.6511	0	0.0245352	4.25392	0	0	0.000221077	0.863137	0.000790094	0.0534612	39.699	24.219	0.234817	0	0	0	0	F4
No	589.425	16.507	0.102	5	1	75865	16	5.5	34.4082	Contaminating mass	42.4137	0.55722	0	4.70624	6.63077e-05	4.49262e-05	0.00205738	0.680644	0.000629378	0.00174255	37.052	14.4914	0.0942032	0	0	0	0	F20
No	589.425	16.604	0.036	5	1	53053.3	16	6.2	38.5448	Contaminating mass	32.337	0.272339	8.7304e-06	9.94894	0.220668	0.000183148	0.00527845	1.98819	0	0.00401748	35.7294	19.494	0	0	0	0	0	F19
No	590.213	3.739	0.069	8	2	6169.81	16	13.1	81.8022	No warnings	0.417487	0	0	0	0	0	0	0	1.80044e-06	3.38954e-06	7.04703	11.7861	17.7493	19.319	19.3677	15.5822	8.73122	F46
No	590.213	3.694	0.067	9	2	10527.3	16	13.1	81.7318	No warnings	0.673224	0.254037	0	0	0	0	0	0	1.93127e-06	3.70232e-06	7.20808	11.591	16.7126	19.2208	18.1184	15.7549	10.4668	F45
No	590.213	3.679	0.068	8	2	8936.17	16	12.9	80.8493	No warnings	0.891272	0	0	0	0	0	0	0	1.7498e-06	3.30636e-06	8.93358	11.9508	18.1636	18.6405	17.6845	14.8511	8.88467	F47
No	590.213	3.692	0.067	8	2	4300.46	16	11.4	71.5456	No warnings	0	0	0	0	0	0	0	4.23583e-07	1.08479e-06	1.22475	32.5634	23.3922	18.8689	14.0695	6.79001	3.09127	0	F48
No	590.213	3.696	0.069	4	2	11473.1	16	1.3	8.15028	Contaminating mass	87.7424	0	0	0	0	0	0.000230231	0	1.47598	0	0	10.7814	0	0	0	0	0	F17
No	590.213	3.845	3.657	1	1	13984.9	16	11	68.7485	Contaminating mass	0	0	0	0	0	0	0	0.00302934	0	0.00595073	0	99.991	0	0	0	0	0	F4
No	590.213	3.696	0.065	4	2	6531.28	16	0.6	3.6622	Contaminating mass	94.1778	0	0	0	0	0	0.000207018	0	1.81583	0	0	4.00611	0	0	0	0	0	F20
No	590.213	3.687	0.068	3	2	5145.58	16	1.4	8.71456	Contaminating mass	87.324	0	0	0	0	0	0	0.000383999	0	0.000754314	0	12.6749	0	0	0	0	0	F18
No	590.213	3.686	0.067	5	2	12765.1	16	0.6	3.62209	Contaminating mass	94.0425	0.242564	0	0	0	0	0.000261649	0	1.71726	0	0	3.99738	0	0	0	0	0	F19
No	590.353	7.692	0.051	4	4	41071	16	0	0.0152599	No warnings	99.9778	0	0	0	0	0	0	0	3.62217e-06	6.27162e-06	0	0.0221884	0	0	0	0	0	F46
No	590.353	7.694	0.052	5	4	51035.3	16	0	0.000548506	No warnings	99.9971	0	0	0.00292537	0	0	0	0	0	0	0	0	0	0	0	0	0	F45
No	590.353	7.693	0.05	4	4	79152	16	0	0.0349756	No warnings	99.9423	0	0	0.00942475	0	0	0	0	7.88255e-06	1.36483e-05	0	0.0482863	0	0	0	0	0	F48
No	590.353	7.695	0.05	4	4	52690.3	16	0	0.0352719	No warnings	99.5199	0.437936	0	0.0421382	0	0	0	0	0	0	0	0	0	0	0	0	0	F47
No	590.353	7.691	0.054	4	4	64578.7	16	0	6.09852e-06	No warnings	99.9999	9.75764e-05	0	0	0	0	0	0	0	0	0	0	0	0	0	0	0	F18
No	590.353	7.695	0.051	4	4	34387	16	0	0.0366075	No warnings	99.5629	0.3999	5.7697e-06	4.09575e-05	0	0.0371373	0	0	0	0	0	0	0	0	0	0	0	F4
No	590.353	7.694	0.054	4	4	51484.3	16	0	0.0383941	No warnings	99.9319	0	0	0.016873	0	0	0	0	8.36248e-06	1.44792e-05	0	0.0512263	0	0	0	0	0	F17
No	590.353	7.692	0.054	4	4	39497.5	16	0	0.00284568	No warnings	99.9545	0.0455309	0	0	0	0	0	0	0	0	0	0	0	0	0	0	0	F20
No	590.353	7.694	0.052	4	4	53459.9	16	0	0.0161332	No warnings	99.9492	0.0300878	0	0	0	0	0	0	3.38311e-06	5.8577e-06	0	0.020724	0	0	0	0	0	F19
No	590.38	17.411	0.039	2	1	25436.6	16	0.3	1.69287	No warnings	97.1523	0.454774	0	0.896642	0	0	0	0	0	0	0	0	0	0	0	0	1.49632	F45
No	590.38	17.237	0.037	1	1	2086.55	16	0.1	0.522939	No warnings	91.633	8.36702	0	0	0	0	0	0	0	0	0	0	0	0	0	0	0	F20
No	590.38	17.134	0.01	1	1	24995.7	16	0.5	3.07458	Irregular exchange	85.4189	0.00133526	0.0541505	14.1021	0	0	0	0	0	0	0	0	0	0	0	0	0.423587	F48
No	590.38	17.436	0.17	1	1	30418.2	16	0	0	No warnings	100	0	0	0	0	0	0	0	0	0	0	0	0	0	0	0	0	F46
No	590.38	17.248	0.158	1	1	12840.6	16	0	0.210541	No warnings	99.7895	0	0	0	0	0	0	0	0	0	0	0	0	0	0	0	0.210541	F17
No	590.38	17.201	0.12	2	1	12481.6	16	0.1	0.526852	No warnings	97.1901	0	0	2.80988	0	0	0	0	0	0	0	0	0	0	0	0	0	F4
No	590.38	17.078	0.036	2	1	66635.9	16	0	0.216794	No warnings	98.9821	0.854513	0	0	0	0	0	0	0	0	0	0	0	0	0	0	0.163387	F19
No	590.38	17.135	0.11	2	1	9895.13	16	0.7	4.27136	Contaminating mass	79.5254	0	0	19.9424	0	0	0	0	0	0	0	0	0	0	0	0	0.532148	F18
No	590.381	15.943	0.122	2	1	44141.1	16	0	0.033815	No warnings	99.9662	0	0	0	0	0	0	0	0	0	0	0	0	0	0	0	0.033815	F46
No	590.381	15.927	0.138	2	1	77477.2	16	0	0.0239043	No warnings	99.9761	0	0	0	0	0	0	0	0	0	0	0	0	0	0	0	0.0239043	F45
No	590.381	15.924	0.134	3	1	53700	16	0.1	0.612482	No warnings	99.0886	0	0	0	0	0	3.26883e-05	0.000164087	0.000286468	0	0.796375	0	0	0	0	0	0.114521	F48
No	590.381	15.941	0.12	3	1	48749.1	16	0.9	5.47452	Low pattern fit	89.9682	1.41251	0	0	0	0	0.000353576	0.00177486	0.0030986	0	8.61404	0	0	0	0	0	0	F47
No	590.381	15.938	0.119	2	1	63668.5	16	0	0.0338496	No warnings	99.9662	0	0	0	0	0	0	0	0	0	0	0	0	0	0	0	0.0338496	F18
No	590.381	15.911	0.314	1	1	197025	16	0	0.0595064	No warnings	99.9107	0	0	0	0	0	3.25456e-06	1.6337e-05	2.85218e-05	0	0.0792898	0	0	0	0	0	0.00992762	F17
No	590.381	15.928	0.154	2	1	107952	16	0	0.0110763	No warnings	99.9889	0	0	0	0	0	0	0	0	0	0	0	0	0	0	0	0.0110763	F4
No	590.381	15.92	0.094	2	1	56564.4	16	0	0.0222241	No warnings	99.9778	0	0	0	0	0	0	0	0	0	0	0	0	0	0	0	0.0222241	F20
No	590.381	15.927	0.115	3	1	64643.2	16	0.1	0.495046	No warnings	99.3658	0	0	0	0	0	1.52214e-05	7.64076e-05	0.000133395	0	0.370835	0	0	0	0	0	0.263169	F19
No	590.401	14.707	0.073	2	1	1243.85	16	0.8	5.00194	Irregular exchange	79.9923	0	0	0	20.0077	0	0	0	0	0	0	0	0	0	0	0	0	F46
No	590.401	14.689	0.084	1	1	1363.09	16	0	0	No warnings	100	0	0	0	0	0	0	0	0	0	0	0	0	0	0	0	0	F45
No	590.401	14.691	0.095	1	1	5395.91	16	0	0	Low pattern fit	100	0	0	0	0	0	0	0	0	0	0	0	0	0	0	0	0	F48
No	590.401	14.691	0.081	1	1	1033.98	16	0.3	1.62925	No warnings	94.4183	0	0	0.0839795	4.21657	0	0.018159	1.26297	0	0	0	0	0	0	0	0	0	F47
No	590.401	14.69	0.075	1	1	4743.73	16	0	0	Low pattern fit	100	0	0	0	0	0	0	0	0	0	0	0	0	0	0	0	0	F18
No	590.401	14.692	0.073	4	1	40504	16	0.1	0.393925	No warnings	98.4243	0	0	0	1.5757	0	0	0	0	0	0	0	0	0	0	0	0	F4
No	590.401	14.691	0.076	2	1	5201.21	16	0	0	No warnings	100	0	0	0	0	0	0	0	0	0	0	0	0	0	0	0	0	F17
No	590.401	14.69	0.083	1	1	1367.95	16	0	0	No warnings	100	0	0	0	0	0	0	0	0	0	0	0	0	0	0	0	0	F20
No	590.401	14.671	0.098	2	1	8398.6	16	0.6	4.01781	Contaminating mass	83.9288	0	0	0	16.0712	0	0	0	0	0	0	0	0	0	0	0	0	F19
No	590.873	16.231	0.052	2	1	1258.6	11	0.8	7.36105	Irregular exchange	66.158	10.5103	0	23.2151	0	0	0	0.116581	0	0	0	0						F45
No	590.873	16.237	0.056	2	1	1072.45	11	0.8	6.96556	Contaminating mass	70.2336	6.83102	0	22.6894	0	0	0	0.245978	0	0	0	0						F20
No	590.873	16.237	0.055	2	1	4166.53	11	0.5	4.59615	Irregular exchange	79.6313	6.34632	0	13.6789	0	0	0	0.105847	0	0	0.180516	0.0571284						F48
No	590.873	16.221	0.057	3	1	1842.01	11	0.4	3.78436	Irregular exchange	82.3109	5.89485	0	11.7066	0	0	0	0.0876174	0	0	0	0						F47
No	590.873	16.217	0.055	3	1	1655.55	11	0.4	3.84271	Contaminating mass	79.7566	9.45215	0	10.6802	0	0	0	0.110997	0	0	0	0						F4
No	590.873	16.224	0.048	3	1	1270.69	11	0.4	3.21053	Contaminating mass	86.7432	2.48926	0	10.6366	0	0	0	0.130967	0	0	0	0						F19
No	590.873	16.237	0.056	2	1	2530.38	11	0.9	8.60492	Contaminating mass	67.431	2.33926	0	29.1817	0.855357	0	0	0.192608	0	0	0	0						F18
No	591.034	17.177	0.046	1	1	4520.28	16	0	0	No warnings	100	0	0	0	0	0	0	0	0	0	0	0	0	0	0	0	0	F48
No	591.034	17.165	0.045	1	1	1822.43	16	0	0	No warnings	100	0	0	0	0	0	0	0	0	0	0	0	0	0	0	0	0	F47
No	591.034	17.158	0.046	2	1	1965.78	16	0.4	2.75982	Contaminating mass	88.9607	0	0	0	11.0393	0	0	0	0	0	0	0	0	0	0	0	0	F17
No	591.034	17.154	0.043	2	1	5804.83	16	0.1	0.821918	Contaminating mass	96.7123	0	0	0	3.28767	0	0	0	0	0	0	0	0	0	0	0	0	F4
No	591.034	17.144	0.039	2	1	2748.33	16	0.6	3.93465	Contaminating mass	84.2614	0	0	0	15.7386	0	0	0	0	0	0	0	0	0	0	0	0	F19
No	591.034	17.131	0.039	4	1	4123.1	16	1	6.29396	Contaminating mass	76.4905	0	0	0	20.1767	0	3.33274	0	0	0	0	0	0	0	0	0	0	F20
No	591.034	17.168	0.027	1	1	5205.7	16	0	0	No warnings	100	0	0	0	0	0	0	0	0	0	0	0	0	0	0	0	0	F18
No	591.312	7.781	0.054	4	1	12221.7	16	0.1	0.524946	No warnings	99.4401	0	0	0	0	0	0	0	0	0	0	0	2.26205e-05	9.3995e-06	0	0.559916	0	F18
No	591.312	7.783	0.053	3	1	21357.4	16	0	0.0511786	No warnings	99.9454	0	0	0	0	0	0	0	0	0	0	0	2.20534e-06	9.16385e-07	0	0.0545879	0	F46
No	591.312	7.784	0.052	3	1	42774	16	0	0.0484267	No warnings	99.9483	0	0	0	0	0	0	0	0	0	0	0	2.08676e-06	8.6711e-07	0	0.0516527	0	F19
No	591.312	7.783	0.052	3	1	28632	16	0	0.130786	No warnings	98.7242	1.06903	0.159832	0	0	0	0	0	0	0	0	0	1.89568e-06	7.87714e-07	0	0.0469232	0	F45
No	591.312	7.784	0.052	2	1	31816.3	16	0	0	No warnings	100	0	0	0	0	0	0	0	0	0	0	0	0	0	0	0	0	F48
No	591.312	7.783	0.05	3	1	29369.1	16	0	0.104673	No warnings	98.5492	1.22687	0.223943	0	0	0	0	0	0	0	0	0	0	0	0	0	0	F47
No	591.312	7.785	0.054	3	1	42831.3	16	0	0.019115	No warnings	99.6942	0.305839	0	0	0	0	0	0	0	0	0	0	0	0	0	0	0	F17
No	591.312	7.782	0.053	3	1	20642.4	16	0	0.0717051	No warnings	98.8527	1.14728	0	0	0	0	0	0	0	0	0	0	0	0	0	0	0	F20
No	591.321	15.442	0.054	4	1	1375.3	16	0.9	5.67968	Irregular exchange	84.8469	1.95504	0	0	0	10.3316	0	0	0	0	0.000246598	0.000625018	0	2.86556	0	0	0	F45
No	591.321	15.442	0.048	3	1	3378.28	16	0.1	0.771475	No warnings	97.2585	1.94131	0	0	0	0	0	0	0	3.54881e-05	6.05796e-05	0.000174115	0	0.799957	0	0	0	F47
No	591.321	15.439	0.049	3	1	1073.46	16	0.5	3.41521	Contaminating mass	89.0713	0	0	0	0	10.9287	0	0	0	0	0	0	0	0	0	0	0	F20
No	591.321	15.443	0.05	3	1	3534.63	16	1.3	8.10186	Irregular exchange	73.4231	0.813666	0	0	0	25.7632	0	0	0	0	0	0	0	0	0	0	0	F48
No	591.321	15.439	0.055	3	1	1483.83	16	0.5	2.89762	Contaminating mass	87.6078	3.89972	0	0	0	8.49243	0	0	0	0	0	0	0	0	0	0	0	F17
No	591.321	15.457	0.048	4	1	2706.22	16	2.1	13.1016	Contaminating mass	60.7132	0.977198	0	0	0	36.4094	0	0	0	0	7.6967e-05	0.000108954	0.000329641	0	1.89967	0	0	F4
No	591.321	15.445	0.056	2	1	1096.9	16	0	0.113035	No warnings	98.1914	1.80856	0	0	0	0	0	0	0	0	0	0	0	0	0	0	0	F19
No	591.321	15.444	0.044	2	1	1271.93	16	0.1	0.345642	No warnings	94.4697	5.53027	0	0	0	0	0	0	0	0	0	0	0	0	0	0	0	F18
No	591.327	11.494	0.077	3	1	5458.2	16	5	31.1809	Contaminating mass	68.8155	0	0	0	0	0	0	0	0	0	0	0	0	0.00163069	0.00316692	0.0458225	31.1339	F20
No	591.327	11.479	0.074	3	1	3704.4	16	1.8	11.078	Irregular exchange	88.9207	0	0	0	0	0	0	0	0	0	0	0	0	0.000579356	0.00112515	0.0162799	11.0613	F48
No	591.327	11.482	0.084	3	1	4252.98	16	1.6	10.0139	Contaminating mass	89.9849	0	0	0	0	0	0	0	0	0	0	0	0	0.000523705	0.00101707	0.0147161	9.99881	F19
No	591.327	11.477	0.074	3	1	4186.54	16	1.6	9.70843	Irregular exchange	90.2905	0	0	0	0	0	0	0	0	0	0	0	0	0.000507729	0.000986046	0.0142672	9.69378	F45
No	591.327	11.484	0.082	3	1	3936.41	16	1.4	8.91375	Contaminating mass	91.0852	0	0	0	0	0	0	0	0	0	0	0	0	0.000466169	0.000905333	0.0130994	8.9003	F18
No	591.327	11.489	0.079	3	1	4222.91	16	1.4	8.58667	Irregular exchange	91.4124	0	0	0	0	0	0	0	0	0	0	0	0	0.000449063	0.000872113	0.0126187	8.57371	F46
No	591.327	11.492	0.077	3	1	3926.13	16	0.9	5.67554	Irregular exchange	94.3238	0	0	0	0	0	0	0	0	0	0	0	0	0.000296818	0.000576441	0.00834059	5.66698	F47
No	591.327	11.473	0.079	4	1	3825.24	16	0.4	2.51541	Contaminating mass	97.4843	0	0	0	0	0	0	0	0	0	0	0	0	0.00013155	0.00025548	0.00369657	2.51162	F17
No	591.348	8.163	0.053	4	1	5195.8	16	0.2	1.10304	No warnings	96.0375	1.01382	0.264219	0	0	0	2.68441	0	0	0	0	0	0	0	0	0	0	F46
No	591.348	8.157	0.053	4	1	5987.29	16	0	0.211687	No warnings	96.613	3.387	0	0	0	0	0	0	0	0	0	0	0	0	0	0	0	F45
No	591.348	8.157	0.052	4	1	9876.41	16	0.1	0.366709	No warnings	95.7873	4.06225	0	0	0	0	0	0	0	5.96985e-06	7.01753e-06	0	0.150415	0	0	0	0	F48
No	591.348	8.155	0.052	3	1	5289.34	16	0	0.0251687	No warnings	99.5973	0.402698	0	0	0	0	0	0	0	0	0	0	0	0	0	0	0	F47
No	591.348	8.157	0.056	3	1	6867.43	16	0	0.113805	No warnings	98.1791	1.82088	0	0	0	0	0	0	0	0	0	0	0	0	0	0	0	F17
No	591.348	8.159	0.052	3	1	6458.89	16	0	0.120137	No warnings	98.0778	1.92219	0	0	0	0	0	0	0	0	0	0	0	0	0	0	0	F4
No	591.348	8.156	0.051	3	1	6583.78	16	0	0.248515	No warnings	96.0238	3.97624	0	0	0	0	0	0	0	0	0	0	0	0	0	0	0	F19
No	591.348	8.156	0.056	3	1	5131.05	16	0	0.0615797	No warnings	99.0147	0.985275	0	0	0	0	0	0	0	0	0	0	0	0	0	0	0	F20
No	591.348	8.157	0.056	3	1	5527.23	16	0	0.148675	No warnings	97.8384	1.94438	0.217206	0	0	0	0	0	0	0	0	0	0	0	0	0	0	F18
No	591.381	14.099	0.058	2	1	1944.38	16	0	0	No warnings	100	0	0	0	0	0	0	0	0	0	0	0	0	0	0	0	0	F46
No	591.381	14.095	0.059	2	1	1166.32	16	0	0	No warnings	100	0	0	0	0	0	0	0	0	0	0	0	0	0	0	0	0	F20
No	591.381	14.095	0.055	2	1	3759.36	16	0	0	No warnings	100	0	0	0	0	0	0	0	0	0	0	0	0	0	0	0	0	F45
No	591.381	14.097	0.053	2	1	3660.39	16	0	0	No warnings	100	0	0	0	0	0	0	0	0	0	0	0	0	0	0	0	0	F48
No	591.381	14.096	0.058	3	1	1540.34	16	0.4	2.63472	No warnings	96.4869	0	0	0	0	0	0	0	0	0.000241834	0.00032197	0	3.51252	0	0	0	0	F47
No	591.381	14.099	0.06	2	1	3095.01	16	0	0.12313	No warnings	98.0299	1.97007	0	0	0	0	0	0	0	0	0	0	0	0	0	0	0	F17
No	591.381	14.098	0.077	2	1	3261.82	16	0	0	No warnings	100	0	0	0	0	0	0	0	0	0	0	0	0	0	0	0	0	F4
No	591.381	14.095	0.059	2	1	2372.61	16	0	0.0659249	No warnings	98.9452	1.0548	0	0	0	0	0	0	0	0	0	0	0	0	0	0	0	F19
No	591.381	14.099	0.064	2	1	2591.44	16	0	0.0116188	No warnings	99.8141	0.185902	0	0	0	0	0	0	0	0	0	0	0	0	0	0	0	F18
No	591.384	7.565	0.055	3	1	11873.8	16	0	0	No warnings	100	0	0	0	0	0	0	0	0	0	0	0	0	0	0	0	0	F46
No	591.384	7.566	0.053	4	1	15031.9	16	0	0	No warnings	100	0	0	0	0	0	0	0	0	0	0	0	0	0	0	0	0	F45
No	591.384	7.563	0.052	3	1	27146.2	16	0	0	No warnings	100	0	0	0	0	0	0	0	0	0	0	0	0	0	0	0	0	F48
No	591.384	7.567	0.051	4	1	16939.2	16	0	0.0169622	No warnings	99.8643	0	0.135697	0	0	0	0	0	0	0	0	0	0	0	0	0	0	F47
No	591.384	7.565	0.055	3	1	16579.8	16	0	0	No warnings	100	0	0	0	0	0	0	0	0	0	0	0	0	0	0	0	0	F17
No	591.384	7.564	0.052	3	1	27425.3	16	0	0.00972756	No warnings	99.9611	0	0	0	0.0389102	0	0	0	0	0	0	0	0	0	0	0	0	F18
No	591.384	7.568	0.051	4	1	14342.3	16	0	0.0320699	No warnings	99.7434	0	0.256559	0	0	0	0	0	0	0	0	0	0	0	0	0	0	F4
No	591.384	7.561	0.054	3	1	16692.8	16	0	0	No warnings	100	0	0	0	0	0	0	0	0	0	0	0	0	0	0	0	0	F20
No	591.384	7.566	0.053	3	1	17659.5	16	0	0	No warnings	100	0	0	0	0	0	0	0	0	0	0	0	0	0	0	0	0	F19
No	591.4	13.324	0.057	3	1	1360.07	16	0.9	5.40009	Contaminating mass	89.1939	0	0	0	0	0	0.00519743	0.0367421	10.7641	0	0	0	0	0	0	0	0	F4
No	592.151	17.753	0.03	1	1	2018.05	16	0	0.128353	Low pattern fit	98.18	1.79879	0	0	0	0	0	0	0	0	0	0	0.0212388	0	0	0	0	F46
No	592.151	17.754	0.043	2	1	3087.32	16	0	0	No warnings	100	0	0	0	0	0	0	0	0	0	0	0	0	0	0	0	0	F20
No	592.151	17.756	0.042	2	1	3426.94	16	0	0	No warnings	100	0	0	0	0	0	0	0	0	0	0	0	0	0	0	0	0	F45
No	592.151	17.746	0.03	1	1	1443.37	16	0	0	Low pattern fit	100	0	0	0	0	0	0	0	0	0	0	0	0	0	0	0	0	F48
No	592.151	17.755	0.048	2	1	2613.13	16	0	0	No warnings	100	0	0	0	0	0	0	0	0	0	0	0	0	0	0	0	0	F47
No	592.151	17.755	0.041	2	1	2637.61	16	0	0	No warnings	100	0	0	0	0	0	0	0	0	0	0	0	0	0	0	0	0	F17
No	592.151	17.755	0.044	1	1	3107.05	16	0	0.0208041	Low pattern fit	99.9723	0	0	0	0	0	0	0	0	0	0	0	0.0277389	0	0	0	0	F4
No	592.151	17.754	0.045	2	1	2281.33	16	0	0	No warnings	100	0	0	0	0	0	0	0	0	0	0	0	0	0	0	0	0	F19
No	592.151	17.759	0.038	1	1	1762.68	16	0	0	Low pattern fit	100	0	0	0	0	0	0	0	0	0	0	0	0	0	0	0	0	F18
No	592.36	13.964	0.064	1	1	1180.27	16	0	0	No warnings	100	0	0	0	0	0	0	0	0	0	0	0	0	0	0	0	0	F48
No	592.36	13.963	0.072	1	1	1108.17	16	0	0	No warnings	100	0	0	0	0	0	0	0	0	0	0	0	0	0	0	0	0	F17
No	592.36	13.966	0.056	2	1	6015.86	16	0	0	No warnings	100	0	0	0	0	0	0	0	0	0	0	0	0	0	0	0	0	F4
No	592.36	13.965	0.071	1	1	1539.71	16	0	0	No warnings	100	0	0	0	0	0	0	0	0	0	0	0	0	0	0	0	0	F19
No	592.36	13.962	0.062	2	1	1346.11	16	0	0	No warnings	100	0	0	0	0	0	0	0	0	0	0	0	0	0	0	0	0	F18
No	592.395	16.525	0.029	5	1	5908.89	16	0.2	1.21541	No warnings	91.2618	5.997	1.75026	0	0	0	2.53686e-05	0	0.00279392	0.471271	0	0.516822	0	0	0	0	0	F45
No	592.395	16.52	0.084	3	1	249554	16	0.2	0.954291	No warnings	84.7313	15.2687	0	0	0	0	0	0	0	0	0	0	0	0	0	0	0	F48
No	592.395	16.523	0.087	2	1	43462.3	16	0.2	1.42949	No warnings	77.1282	22.8718	0	0	0	0	0	0	0	0	0	0	0	0	0	0	0	F47
No	592.395	16.536	0.092	3	1	89224.1	16	0.2	1.2656	Contaminating mass	79.7505	20.2495	0	0	0	0	0	0	0	0	0	0	0	0	0	0	0	F18
No	592.395	16.523	0.089	3	1	82307.1	16	0.2	1.18765	Contaminating mass	80.9975	19.0025	0	0	0	0	0	0	0	0	0	0	0	0	0	0	0	F4
No	592.395	16.527	0.089	2	1	33786.7	16	0.2	1.33793	Contaminating mass	78.5931	21.4069	0	0	0	0	0	0	0	0	0	0	0	0	0	0	0	F17
No	592.395	16.519	0.069	2	1	22303.6	16	0.2	1.48405	Contaminating mass	77.0435	22.1682	0.788253	0	0	0	0	0	0	0	0	0	0	0	0	0	0	F20
No	592.395	16.516	0.098	2	1	52856.7	16	0.4	2.28796	Contaminating mass	63.3927	36.6073	0	0	0	0	0	0	0	0	0	0	0	0	0	0	0	F19
No	592.395	16.52	0.084	2	1	254863	16	0.1	0.578716	No warnings	90.7405	9.25946	0	0	0	0	0	0	0	0	0	0	0	0	0	0	0	F48
No	592.395	16.506	0.095	2	1	86352.6	16	0.3	2.16132	No warnings	65.4189	34.5811	0	0	0	0	0	0	0	0	0	0	0	0	0	0	0	F47
No	592.395	16.429	0.09	2	1	11809.7	16	0	0.0112888	No warnings	99.9887	0	0	0	0	0	0	0	0	0	0	0	0	0	0	0	0.0112888	F17
No	592.395	16.433	0.079	1	1	24382.6	16	0	0	No warnings	100	0	0	0	0	0	0	0	0	0	0	0	0	0	0	0	0	F18
No	592.395	16.43	0.085	2	1	26857	16	0	0.0102072	No warnings	99.9898	0	0	0	0	0	0	0	0	0	0	0	0	0	0	0	0.0102072	F4
No	592.395	16.516	0.139	2	1	43148.5	16	0.1	0.472732	No warnings	92.4363	7.5637	0	0	0	0	0	0	0	0	0	0	0	0	0	0	0	F20
No	592.395	16.517	0.098	3	1	73201.9	16	0.3	1.85084	Contaminating mass	75.609	22.8299	0.0604716	0	1.40752	0	0	0	0	0	0.00164313	0.0896355	0	0	0	0	0.00188638	F19
No	592.436	16.802	0.075	1	1	4080.04	16	0.6	3.63171	Low pattern fit	96.3683	0	0	0	0	0	0	0	0	0	0	0	0	0	0	0	3.63171	F45
No	592.436	16.979	0.102	1	1	1633.45	16	0.2	1.21436	Low pattern fit	98.7856	0	0	0	0	0	0	0	0	0	0	0	0	0	0	0	1.21436	F46
No	592.436	17.166	0.014	2	1	4642.34	16	4	25.1132	Contaminating mass	50.0154	0	0	0	0	0	0	0.766	48.881	0	0	0	0	0	0	0	0.337602	F20
No	592.436	17.045	0.058	2	1	9837	16	6.4	40.195	Irregular exchange	10.2751	0	0	0	0	0	1.10659	72.5409	16.0681	0	0	0	0	0	0	0	0.00929416	F48
No	592.436	16.988	0.022	2	1	3699.76	16	2.3	14.3959	Low pattern fit	67.0393	0	0	0	0	0	0.566153	32.3749	0	0	0	0	0	0	0	0	0.0195732	F47
No	592.436	16.954	0.074	2	1	2163.54	16	4.3	26.9984	Contaminating mass	45.8988	0	0	0	0	0	0	0.834723	53.2665	0	0	0	0	0	0	0	0	F17
No	592.436	16.961	0.017	2	1	5621.51	16	8.4	52.5744	Contaminating mass	34.4389	0	0	0	0	0	0.396044	22.6474	0	0	0	0	0	0	0	0	42.5177	F4
No	592.436	17.022	0.016	2	1	1373.99	16	7.6	47.385	Contaminating mass	0.177306	5.64136	0	0	0	0	0	1.45211	92.6642	0	0	0	0	0	0	0	0.0650331	F19
No	592.436	17.019	0.032	2	1	5169.24	16	4	25.1275	Contaminating mass	43.259	0	0	0	0	0	0.883098	50.581	5.21941	0	0	0	0	0	0	0	0.0574843	F18
No	592.468	16.813	0.13	3	1	28847.1	16	4.8	30.1089	No warnings	0.821855	0	0	0	14.1596	85.0176	0	0	0	0	0	0	0	0	0	0	0.000962677	F45
No	592.468	16.85	0.144	4	1	32717.3	16	4.8	30.2693	Contaminating mass	0.627637	0	0	0	12.5535	86.8188	0	0	0	0	0	0	0	0	0	0	0	F20
No	592.468	16.833	0.219	3	1	38236.7	16	4.9	30.9015	No warnings	0.358801	0	0	0.0854846	3.61173	95.944	0	0	0	0	0	0	0	0	0	0	0	F47
No	592.468	16.841	0.086	3	1	32867.8	16	5	31.0603	No warnings	0.518122	0	0	0	0.444828	99.0371	0	0	0	0	0	0	0	0	0	0	0	F48
No	592.468	16.847	0.108	5	1	33793.1	16	4.9	30.5671	No warnings	0.820687	0	0	0	6.82287	92.3564	0	0	0	0	0	0	0	0	0	0	0	F46
No	592.468	16.844	0.098	4	1	80309.9	16	4.9	30.9301	Contaminating mass	0.576535	0	0	0	2.23583	97.1876	0	0	0	0	0	0	0	0	0	0	0	F17
No	592.468	16.839	0.087	4	1	218324	16	5	31.0119	Contaminating mass	0.719532	0	0	0	0.360004	98.9071	0	0	0	0	0	0	0	0	0	0	0.0134004	F4
No	592.468	16.853	0.142	3	1	41178.5	16	5	31.1536	Contaminating mass	0.299402	0	0	0	0.0460102	99.6546	0	0	0	0	0	0	0	0	0	0	0	F19
No	592.468	16.839	0.095	4	1	94072.9	16	5	31.0972	Contaminating mass	0.41028	0.00027761	0	0	0.392061	99.1974	0	0	0	0	0	0	0	0	0	0	0	F18
No	593.021	17.115	0.044	2	1	7519.19	16	6.6	41.0726	Contaminating mass	56.1887	0	0	0	0	0	0	0	0	0	0	0.000245489	0	0.00378987	0	43.8073	0	F19
No	593.021	17.14	0.028	2	1	6648.85	16	4.7	29.4567	Contaminating mass	68.5791	0	0	0	0	0	0	0	0	0	0	0.000176061	0	0.00271805	0	31.418	0	F20
No	593.021	17.141	0.037	2	1	3864.57	16	3.9	24.5856	Contaminating mass	73.775	0	0	0	0	0	0	0	0	0	0	0.000146947	0	0.00226857	0	26.2225	0	F17
No	593.021	17.145	0.039	2	1	4672.51	16	1	6.48635	Irregular exchange	93.0811	0	0	0	0	0	0	0	0	0	0	3.87686e-05	0	0.000598511	0	6.91822	0	F45
No	593.021	17.173	0.026	1	1	9323.9	16	0	0	No warnings	100	0	0	0	0	0	0	0	0	0	0	0	0	0	0	0	0	F48
No	593.021	17.167	0.048	1	1	5240.66	16	0	0	No warnings	100	0	0	0	0	0	0	0	0	0	0	0	0	0	0	0	0	F47
No	593.021	17.172	0.011	1	1	2161.54	16	0	0	No warnings	100	0	0	0	0	0	0	0	0	0	0	0	0	0	0	0	0	F18
No	593.058	17.146	0.051	2	1	11397.6	16	12.2	76.533	Contaminating mass	18.2273	0.981089	0	0	0	0	0	0	0	0	0	0	0.000299895	0.00379334	0.000161161	69.1062	11.6812	F4
No	593.058	17.136	0.105	1	1	4459.67	16	15.3	95.4689	Contaminating mass	0	0	0	0	0	0	0	0	0	0	0	0	0.00408949	0.00313899	0.00037971	72.4705	27.5219	F17
No	593.058	17.139	0.036	2	1	5632.19	16	9.4	58.728	Contaminating mass	37.3562	0	0	0	0	0	0	0	0	0	0	0	0.00148785	0.00249098	0	62.6399	0	F18
No	593.058	17.144	0.017	3	1	2143.17	16	7.6	47.5058	Contaminating mass	46.1275	3.42734	0	0	0	0	0	0	0	0	0	0	0.00284637	0.00135177	0	50.441	0	F19
No	593.058	17.122	0.022	2	1	1184.31	16	2.2	13.6449	Irregular exchange	85.4452	0	0	0	0	0	0	0	0	0	0	0	0.000821256	0.000390023	0	14.5536	0	F45
No	593.058	17.133	0.03	1	1	3415.45	16	0	0	No warnings	100	0	0	0	0	0	0	0	0	0	0	0	0	0	0	0	0	F48
No	593.235	10.346	0.071	2	1	2223.9	16	0	0	No warnings	100	0	0	0	0	0	0	0	0	0	0	0	0	0	0	0	0	F20
No	593.235	10.352	0.061	4	1	1164.26	16	0.1	0.91596	No warnings	89.7176	8.09594	0	2.18647	0	0	0	0	0	0	0	0	0	0	0	0	0	F47
No	593.346	7.907	0.054	2	1	1887.54	16	0	0	No warnings	100	0	0	0	0	0	0	0	0	0	0	0	0	0	0	0	0	F45
No	593.346	7.907	0.053	3	1	1858.47	16	0	0	No warnings	100	0	0	0	0	0	0	0	0	0	0	0	0	0	0	0	0	F46
No	593.346	7.907	0.054	2	1	1600.6	16	0	0	No warnings	100	0	0	0	0	0	0	0	0	0	0	0	0	0	0	0	0	F20
No	593.346	7.908	0.052	2	1	1594.1	16	0	0	No warnings	100	0	0	0	0	0	0	0	0	0	0	0	0	0	0	0	0	F48
No	593.346	7.905	0.051	2	1	1969.14	16	0	0	No warnings	100	0	0	0	0	0	0	0	0	0	0	0	0	0	0	0	0	F47
No	593.346	7.906	0.054	2	1	1864.46	16	0	0	No warnings	100	0	0	0	0	0	0	0	0	0	0	0	0	0	0	0	0	F17
No	593.346	7.906	0.051	2	1	1740.18	16	0	0	No warnings	100	0	0	0	0	0	0	0	0	0	0	0	0	0	0	0	0	F19
No	593.346	7.906	0.055	1	1	1374.6	16	0	0	No warnings	100	0	0	0	0	0	0	0	0	0	0	0	0	0	0	0	0	F18
No	593.35	16.225	0.016	1	1	2151.23	16	1.9	11.8328	Low pattern fit	88.1672	0	0	0	0	0	0	0	0	0	0	0	0	0	0	0	11.8328	F48
No	593.35	16.18	0.176	3	1	2724.52	16	7.5	47.1641	Contaminating mass	17.3242	0	0	10.1796	0	0	0	0	0	0.874245	71.6219	0	0	0	0	0	0	F4
No	593.35	16.229	0.061	2	1	1105.8	16	0.1	0.776847	Contaminating mass	98.6169	0	0	0	0	0	0	0	0.0187234	1.36442	0	0	0	0	0	0	0	F18
No	593.363	7.319	0.067	1	1	1107.5	16	0	0	No warnings	100	0	0	0	0	0	0	0	0	0	0	0	0	0	0	0	0	F17
No	593.363	7.326	0.076	2	1	1140.48	16	0	0	No warnings	100	0	0	0	0	0	0	0	0	0	0	0	0	0	0	0	0	F19
No	593.384	18.018	0.01	2	1	1606.45	16	10	62.2768	Irregular exchange	0	0.00115564	0.00711063	0	0.151566	28.892	0	0	0	0	0.0153186	0	70.9328	0	0	0	0	F45
No	593.384	17.976	0.114	1	1	1175.89	16	11	68.7432	No warnings	0	0	0	0	0	0	0	0.00164136	0.0192797	0.0223478	0	99.9567	0	0	0	0	0	F46
No	593.384	18.02	0.041	2	1	2470.39	16	10.2	63.9876	Contaminating mass	0	0	0	0	0	0	0	0.000649375	0.00826951	0.0249303	76.1209	23.8453	0	0	0	0	0	F4
No	593.387	18.002	0.05	1	1	2535.8	16	0	0	No warnings	100	0	0	0	0	0	0	0	0	0	0	0	0	0	0	0	0	F45
No	593.387	18.008	0.038	2	1	1357.5	16	0	0	No warnings	100	0	0	0	0	0	0	0	0	0	0	0	0	0	0	0	0	F20
No	593.387	18.015	0.078	1	1	2555.61	16	0	0	No warnings	100	0	0	0	0	0	0	0	0	0	0	0	0	0	0	0	0	F17
No	593.387	18.009	0.052	3	1	2612.9	16	0.4	2.50749	Contaminating mass	95.5324	0	0	0	0	0	0	0	0.0882874	4.37928	0	0	0	0	0	0	0	F4
No	593.387	18.015	0.044	2	1	1503.48	16	0	0	No warnings	100	0	0	0	0	0	0	0	0	0	0	0	0	0	0	0	0	F19
No	593.387	18.014	0.048	1	1	1351.87	16	0	0	No warnings	100	0	0	0	0	0	0	0	0	0	0	0	0	0	0	0	0	F18
No	593.426	16.279	0.074	2	1	1973.63	16	0	0	No warnings	100	0	0	0	0	0	0	0	0	0	0	0	0	0	0	0	0	F46
No	593.426	16.275	0.071	1	1	1248.33	16	0	0	No warnings	100	0	0	0	0	0	0	0	0	0	0	0	0	0	0	0	0	F45
No	593.426	16.22	0.092	3	1	42899.1	16	10.7	67.0134	Irregular exchange	10.6429	0	0	0	0	0	0	0	0.000486174	0.0116458	0.0170189	0	89.328	0	0	0	0	F48
No	593.426	16.253	0.073	4	1	24531.9	16	11.3	70.3488	Irregular exchange	6.19951	0	0	0	0	0	0	0	0	0.0020905	0.00966094	0	93.7887	0	0	0	0	F47
No	593.426	16.281	0.077	2	1	3491.43	16	0	0	No warnings	100	0	0	0	0	0	0	0	0	0	0	0	0	0	0	0	0	F17
No	593.426	16.275	0.068	2	1	4237.6	16	0	0	No warnings	100	0	0	0	0	0	0	0	0	0	0	0	0	0	0	0	0	F4
No	593.426	16.225	0.05	3	1	19847.1	16	11	68.8067	Contaminating mass	8.25537	0	0	0	0	0	0	0	0	0.00146741	0.009429	0.00480822	91.7289	0	0	0	0	F20
No	593.426	16.147	0.06	2	1	10985.8	16	7.6	47.3357	Contaminating mass	36.8815	0	0	0	0	0	0	0	0.000343414	0.00822616	0.0120215	0	63.0979	0	0	0	0	F18
No	593.426	16.279	0.072	2	1	8975.96	16	0	0	No warnings	100	0	0	0	0	0	0	0	0	0	0	0	0	0	0	0	0	F19
No	594.339	14.192	0.055	1	1	2066.73	16	12.7	79.2266	Contaminating mass	2.3779	0	0	0	0	0	0	0	0	0	0.33101	0.23399	0	97.0571	0	0	0	F4
No	594.339	14.269	0.055	3	1	3705.66	16	4.4	27.7582	Contaminating mass	65.7967	0	0	0	0	0	0	0	0	0	0.115974	0.0819818	0	34.0054	0	0	0	F20
No	594.339	14.274	0.055	3	1	3246.29	16	1.4	8.72168	Contaminating mass	89.2567	0	0	0	0	0	0	0	0	0	0.0185144	0.0305752	0	10.6943	0	0	0	F18
No	594.339	14.256	0.059	3	1	3876.31	16	1.2	7.6525	Contaminating mass	90.5707	0	0	0	0	0	0	0	0	0	0.0319722	0.0226011	0	9.37475	0	0	0	F19
No	594.339	14.273	0.051	2	1	2969.05	16	0.9	5.59468	Irregular exchange	93.1063	0	0	0	0	0	0	0	0	0	0.0233746	0.0165235	0	6.8538	0	0	0	F48
No	594.339	14.263	0.055	3	1	6197.84	16	0.7	4.13444	Contaminating mass	94.9056	0	0	0	0	0	0	0	0	0	0.0172737	0.0122107	0	5.06492	0	0	0	F17
No	594.339	14.258	0.056	3	1	3950.24	16	0.5	3.1978	No warnings	96.0597	0	0	0	0	0	0	0	0	0	0.0133604	0.00944445	0	3.91748	0	0	0	F46
No	594.339	14.264	0.05	3	1	3605.11	16	0.5	2.96777	No warnings	96.3432	0	0	0	0	0	0	0	0	0	0.0123994	0.00876508	0	3.63568	0	0	0	F47
No	594.339	14.264	0.051	3	1	7513.39	16	0.5	2.9649	No warnings	96.3467	0	0	0	0	0	0	0	0	0	0.0123874	0.00875661	0	3.63217	0	0	0	F45
No	594.345	17.644	0.06	1	1	1438.2	16	16	100	Low pattern fit	0	0	0	0	0	0	0	0	0	0	0	0	0	0	0	0	100	F45
No	594.345	17.579	0.016	1	1	59645.4	16	0	0.00100901	No warnings	99.999	0	0	0	0	0	0	0	0	0	0	0	0	0	0	0	0.00100901	F48
No	594.345	17.571	0.015	1	1	19768.7	16	0	0	No warnings	100	0	0	0	0	0	0	0	0	0	0	0	0	0	0	0	0	F47
No	594.345	17.582	0.022	1	1	18383.9	16	0	0.0198274	No warnings	99.9802	0	0	0	0	0	0	0	0	0	0	0	0	0	0	0	0.0198274	F18
No	594.345	17.573	0.018	1	1	20915.9	16	0	0	No warnings	100	0	0	0	0	0	0	0	0	0	0	0	0	0	0	0	0	F4
No	594.345	17.543	0.059	1	1	4036.2	16	1.3	8.03841	Contaminating mass	0.835241	97.2014	0	0	0	0	0	0	0	0	0	0	0	0	0	0	1.96332	F17
No	594.345	17.605	0.033	1	1	1045.26	16	14.4	90.0812	Contaminating mass	0	0.0830473	11.2468	0	0	0	0	0	0	0	0	0	0	0	0	0	88.6702	F20
No	594.345	17.545	0.005	1	1	6274.63	16	0.4	2.40554	Contaminating mass	68.4905	31.0442	0	0	0	0	0	0	0	0	0	0	0	0	0	0	0.465281	F19
No	594.355	15.991	0.111	2	1	8697.5	16	0.1	0.814929	No warnings	86.9611	13.0389	0	0	0	0	0	0	0	0	0	0	0	0	0	0	0	F48
No	594.355	15.975	0.025	2	1	1275.52	16	0.2	1.34426	Contaminating mass	78.4918	21.5082	0	0	0	0	0	0	0	0	0	0	0	0	0	0	0	F17
No	594.355	15.978	0.034	4	1	3895.04	16	0.5	2.96636	Contaminating mass	88.3168	0	8.24075	0	0	0	0	0.000964588	0	3.4415	0	0	0	0	0	0	0	F4
No	594.355	15.976	0.076	1	1	3544.24	16	0	0	No warnings	100	0	0	0	0	0	0	0	0	0	0	0	0	0	0	0	0	F18
No	594.376	14.959	0.051	1	1	3352.45	16	0	0	No warnings	100	0	0	0	0	0	0	0	0	0	0	0	0	0	0	0	0	F45
No	594.376	14.968	0.045	2	1	4762.4	16	0	0.0477522	No warnings	99.236	0.764035	0	0	0	0	0	0	0	0	0	0	0	0	0	0	0	F48
No	594.376	14.963	0.067	2	1	2390.67	16	1	6.47856	Contaminating mass	0.878195	97.6101	0	0	1.51174	0	0	0	0	0	0	0	0	0	0	0	0	F4
No	594.376	14.96	0.065	3	1	7541.81	16	0	0	No warnings	100	0	0	0	0	0	0	0	0	0	0	0	0	0	0	0	0	F18
No	594.47	17.833	0.083	4	4	90001.2	16	4	25.1024	Irregular exchange	60.3401	1.22663	0.0435205	3.2183	0	0	0	0	0	0.000457835	0.000609056	32.2975	1.95981	0.913028	0	0	0	F46
No	594.47	17.846	0.042	4	4	146695	16	3.2	19.9295	Contaminating mass	57.0422	15.6478	0	0	0	0	0	0	0	0.000440695	0.00395115	24.49	2.81139	0.00418224	0	0	0	F17
No	594.47	17.833	0.081	4	4	48763.8	16	5	31.078	Irregular exchange	50.6556	2.33711	0.0484563	3.5833	0	0	0	0	0	0.00105379	0.00115397	36.4372	6.93616	0	0	0	0	F45
No	594.47	17.496	0.009	2	2	12835.3	16	10.4	64.728	Irregular exchange	0	0	0.113661	8.40515	0	0	0	0	0.00563872	0.00468398	0.18718	87.1575	4.12618	0	0	0	0	F48
No	594.47	17.856	0.113	1	3	6493.22	16	9.1	57.0132	Irregular exchange	0.142602	8.10504	0.174541	12.9072	0	0	0	0	0.00966305	0.00560514	0.300551	78.3548	0	0	0	0	0	F47
No	594.47	17.743	0.12	2	2	33013	16	11.1	69.3287	Contaminating mass	0	0	0	0.00372014	0.311784	0	0	0	0	0.00261032	0.00272193	88.2003	11.4789	0	0	0	0	F18
No	594.47	17.88	0.02	1	4	116898	16	1.1	6.74035	Contaminating mass	78.1282	9.78331	0.0423186	4.31213	0	0	0	0	0.00094997	0.000551039	0.0295471	7.70303	0	0	0	0	0	F4
No	594.47	17.832	0.077	2	4	63984.8	16	6.4	40.2421	Contaminating mass	40.7582	0.468748	0.0095016	0.702636	0	0	0	0	0.00028905	0.0016615	0.0237736	55.3989	2.63632	0	0	0	0	F20
No	594.47	17.758	0.009	2	4	3757.16	16	8.6	53.7464	Contaminating mass	12.4953	5.01459	0.148957	14.8055	0	0	0	0	0	0.00622215	0.00677443	0.1824	67.3402	0	0	0	0	F19
No	594.914	17.844	0.057	1	1	1367.44	9	0	0	No warnings	100	0	0	0	0	0	0	0	0	0								F45
No	594.914	17.843	0.061	1	1	1699.05	9	0	0	No warnings	100	0	0	0	0	0	0	0	0	0								F20
No	594.914	17.842	0.065	1	1	2312.69	9	0	0	No warnings	100	0	0	0	0	0	0	0	0	0								F19
No	595.169	6.05	0.036	10	1	1423.51	16	11.9	74.5344	No warnings	0	0	0	0	0	0	0	1.53644	2.91907	10.6067	11.6654	13.7967	17.6555	18.0422	12.079	8.14059	3.55845	F45
No	595.169	6.057	0.033	9	1	1161.06	16	11.9	74.5469	No warnings	0	0	0	0	0	0	0	0	4.20625	9.06679	13.125	15.7323	17.3181	16.7561	12.0848	9.00964	2.70097	F47
No	595.169	6.055	0.039	4	1	1461.22	16	0	0.168436	No warnings	99.0346	0	0.201171	0.764211	0	0	0	0	0	0	0	0	0	0	0	0	0	F17
No	595.169	6.059	0.038	3	1	1912.07	16	0.1	0.777404	Contaminating mass	95.8538	0	0	4.14616	0	0	0	0	0	0	0	0	0	0	0	0	0	F19
No	595.399	17.927	0.029	1	1	1106.84	16	0	0	No warnings	100	0	0	0	0	0	0	0	0	0	0	0	0	0	0	0	0	F48
No	595.399	17.911	0.038	1	1	1062.34	16	0	0	No warnings	100	0	0	0	0	0	0	0	0	0	0	0	0	0	0	0	0	F47
No	595.399	17.615	0.017	1	1	1133.91	16	0	0	No warnings	100	0	0	0	0	0	0	0	0	0	0	0	0	0	0	0	0	F17
No	595.399	17.922	0.041	3	1	3406.13	16	0.2	1.09739	Contaminating mass	91.2209	0	8.7791	0	0	0	0	0	0	0	0	0	0	0	0	0	0	F4
No	595.399	17.906	0.03	1	1	1041.77	16	0	0	No warnings	100	0	0	0	0	0	0	0	0	0	0	0	0	0	0	0	0	F18
No	595.429	17.093	0.04	2	1	5185.26	16	10	62.4946	No warnings	0	0	0	0	0	0	0	0.00292643	0.0142274	0.048404	99.9344	0	0	0	0	0	0	F45
No	595.429	17.131	0.048	1	1	5675.15	16	10	62.4916	No warnings	0	0	0	0	0	0	0	0.00601805	0.021112	0.0741382	99.8987	0	0	0	0	0	0	F46
No	595.429	17.107	0.043	1	1	6293.37	16	10	62.4788	Contaminating mass	0	0	0	0	0	0	0	0.0190229	0.0500719	0.182388	99.7485	0	0	0	0	0	0	F20
No	595.429	17.104	0.02	1	1	2948.16	16	10	62.4922	No warnings	0	0	0	0	0	0	0	0.00537564	0.0196814	0.0687908	99.9062	0	0	0	0	0	0	F47
No	595.429	17.147	0.035	2	1	12872.2	16	10	62.4976	Contaminating mass	0	0	0	0	0	0	0	0	0.00746384	0.0232195	99.9693	0	0	0	0	0	0	F17
No	595.429	17.097	0.044	3	1	17001.4	16	8.3	51.986	Contaminating mass	17.0539	0	0	0	0	0	0	0	0.0032054	0.00916394	80.6033	2.33038	0	0	0	0	0	F4
No	595.429	17.116	0.031	2	1	15905.4	16	10	62.4961	Contaminating mass	0	0	0	0	0	0	0	0.00145018	0.01094	0.036116	99.9515	0	0	0	0	0	0	F19
No	596.246	8.031	0.056	2	1	1075.86	16	0	0	No warnings	100	0	0	0	0	0	0	0	0	0	0	0	0	0	0	0	0	F48
No	596.246	8.028	0.055	2	1	1582.38	16	0	0	No warnings	100	0	0	0	0	0	0	0	0	0	0	0	0	0	0	0	0	F17
No	596.246	8.029	0.052	2	1	1521.26	16	0	0	No warnings	100	0	0	0	0	0	0	0	0	0	0	0	0	0	0	0	0	F19
No	596.267	7.785	0.053	3	1	4845.32	16	0	0.0882574	No warnings	99.2939	0	0.706059	0	0	0	0	0	0	0	0	0	0	0	0	0	0	F46
No	596.267	7.785	0.05	3	1	7098.64	16	0	0	No warnings	100	0	0	0	0	0	0	0	0	0	0	0	0	0	0	0	0	F45
No	596.267	7.787	0.053	3	1	6507.47	16	0	0.0593585	No warnings	99.5251	0	0.474868	0	0	0	0	0	0	0	0	0	0	0	0	0	0	F48
No	596.267	7.785	0.051	3	1	6296.48	16	0	0.0437904	No warnings	99.6497	0	0.350323	0	0	0	0	0	0	0	0	0	0	0	0	0	0	F47
No	596.267	7.785	0.053	3	1	9180.69	16	0	0.0367901	No warnings	99.7057	0	0.294321	0	0	0	0	0	0	0	0	0	0	0	0	0	0	F17
No	596.267	7.783	0.055	3	1	4119.87	16	0	0.0130824	No warnings	99.8953	0	0.104659	0	0	0	0	0	0	0	0	0	0	0	0	0	0	F20
No	596.267	7.782	0.055	3	1	2356.93	16	0	0	No warnings	100	0	0	0	0	0	0	0	0	0	0	0	0	0	0	0	0	F18
No	596.267	7.785	0.053	3	1	8507.41	16	0	0.138831	No warnings	98.8894	0	1.11065	0	0	0	0	0	0	0	0	0	0	0	0	0	0	F19
No	596.328	17.779	0.029	1	1	1155.99	16	16	100	Contaminating mass	0	0	0	0	0	0	0	0	0	0	0	0	0	0	0	0	100	F20
No	596.328	17.892	0.084	1	1	1529.69	16	16	100	Contaminating mass	0	0	0	0	0	0	0	0	0	0	0	0	0	0	0	0	100	F18
No	596.333	14.195	0.053	2	1	5188.61	16	0	0	No warnings	100	0	0	0	0	0	0	0	0	0	0	0	0	0	0	0	0	F46
No	596.333	14.197	0.051	3	1	10620.6	16	0	0	No warnings	100	0	0	0	0	0	0	0	0	0	0	0	0	0	0	0	0	F45
No	596.333	14.197	0.052	2	1	36600.6	16	0	0	No warnings	100	0	0	0	0	0	0	0	0	0	0	0	0	0	0	0	0	F48
No	596.333	14.196	0.047	2	1	4564.53	16	0	0	No warnings	100	0	0	0	0	0	0	0	0	0	0	0	0	0	0	0	0	F47
No	596.333	14.196	0.049	2	1	39905.3	16	0	0	No warnings	100	0	0	0	0	0	0	0	0	0	0	0	0	0	0	0	0	F18
No	596.333	14.194	0.049	2	1	80899.9	16	0	0	No warnings	100	0	0	0	0	0	0	0	0	0	0	0	0	0	0	0	0	F4
No	596.333	14.192	0.052	2	1	12891.4	16	0	0.0789281	No warnings	99.3631	0.0109412	0.625954	0	0	0	0	0	0	0	0	0	0	0	0	0	0	F17
No	596.333	14.197	0.055	2	1	4912.83	16	1.3	8.13242	Contaminating mass	91.8676	0	0	0	0	0	0	0	0	0	0	0	0	0	0	0	8.13242	F20
No	596.333	14.195	0.055	3	1	10312	16	0	0	No warnings	100	0	0	0	0	0	0	0	0	0	0	0	0	0	0	0	0	F19
No	596.382	17.023	0.041	3	2	4640.62	16	10.6	66.0283	Contaminating mass	13.784	0	0	0.000133278	0.000919673	0.00669391	1.93412	14.5216	0.000126685	18.088	0.240088	0.00476206	8.02965	0.000102249	0	12.6813	30.7085	F4
No	596.382	17.014	0.112	3	2	5023.9	16	5.7	35.4769	Irregular exchange	8.62825	5.19161	0	0	0.00202403	0.000212404	58.6322	23.299	0	0	0	4.08078	0	0	0	0	0.16589	F45
No	596.382	17.067	0.006	3	2	3134.18	16	6.4	39.9039	Contaminating mass	16.4452	2.8244	0	0.000602508	0.00153474	0.03165	36.9897	20.0954	7.37892	0	0	9.17728	0	0	0	0	7.05529	F20
No	596.382	17.07	0.01	2	2	12913.3	16	6.8	42.5334	Irregular exchange	34.0954	0	0	0.00111465	0	0.0575167	16.3414	0	0	0.000963658	0.0140643	11.8285	37.6611	0	0	0	0	F48
No	596.382	17.107	0.417	2	2	10431.3	16	6	37.4919	No warnings	0	8.8645e-05	0	0.0064798	1.24714	0.00728073	98.0141	1.37375e-05	0.46111	0.166983	0	0	0	0	0	0	0.0968143	F46
No	596.382	17.079	0.033	1	2	3334.62	16	5	31.2896	Irregular exchange	37.3036	0	0	0.00127512	0	0.067896	18.6955	0.0907592	39.2365	0	0	0	0	0	0	0.0819475	4.52259	F47
No	596.382	17.175	0.047	2	2	5602.97	16	6.7	41.6249	Contaminating mass	3.10638	0.754849	0	0.00360466	0	0.188287	52.8481	0.0987372	42.6855	0	0	0	0	0	0	0.00537762	0.30913	F17
No	596.382	17.069	0.014	4	2	8701.31	16	8.5	53.0385	Contaminating mass	15.7892	0	0	0.00163867	0	0.0845563	24.0241	0.000350885	12.8515	3.7451	0	0	32.1326	0	0	0.00304067	11.368	F19
No	596.382	17.075	0.02	2	2	11232.3	16	7	43.5643	Contaminating mass	35.6269	0	0	0.000127364	0	0.0331965	9.42657	0.000373463	0.0111653	6.27012	0.00436683	0.0287862	48.5385	0	0	0	0.0598948	F18
No	596.45	15.421	0.077	5	3	196276	16	1.5	9.68554	Contaminating mass	50.4682	0.506174	0	46.0817	2.02234	0	0.000376959	0.00340881	0.809504	0	0	0	1.26542e-05	3.96057e-05	0	0.106403	0.00182664	F20
No	596.45	15.48	0.128	7	3	569334	16	1.1	6.86554	Contaminating mass	64.6382	0.0909729	0.997857	33.3638	0.00605122	0	0	6.10031e-05	0.702021	0.164348	0	0	4.36493e-06	1.36615e-05	0	0.0367025	0	F17
No	596.45	15.417	0.077	4	3	148463	16	1.7	10.7902	Irregular exchange	43.8095	0.518684	0	54.6586	0	0	0	0.000118661	0.969447	0.043679	0	0	0	0	0	0	0	F46
No	596.45	15.418	0.067	4	3	146722	16	2.1	12.9844	Irregular exchange	33.3089	1.33377	0	61.8372	1.84014	0	0	0.000209612	1.57418	0.105573	0	0	0	0	0	0	0	F45
No	596.45	15.404	0.071	6	3	329892	16	1.2	7.34974	Irregular exchange	63.2258	0.00706268	0	34.6878	0.913009	0	0	0	0.920222	0.0237148	0.148064	0.0743049	0	0	0	0	0	F48
No	596.45	15.409	0.061	5	3	267450	16	2.2	13.5521	Irregular exchange	26.3268	2.68056	0	70.0023	0.868694	0.100592	9.74926e-06	8.81619e-05	0.0209362	0	0	0	0	0	0	0	0	F47
No	596.45	15.404	0.065	5	3	234358	16	1.6	10.2024	Contaminating mass	46.2893	0	0	51.6821	2.00896	0	9.10263e-06	8.23145e-05	0.0195475	0	0	0	0	0	0	0	0	F18
No	596.45	15.409	0.057	7	3	1.10628e+06	16	1.9	11.9554	Contaminating mass	36.4039	0.355541	0	62.0638	1.16251	0.00839011	2.72574e-06	2.46487e-05	0.00585343	0	0	0	0	0	0	0	0	F4
No	596.45	15.415	0.067	6	3	517231	16	0.9	5.90849	Contaminating mass	70.087	0.145319	0	28.1838	0.766776	3.17513e-07	0	7.25269e-06	0.701566	0.0555808	0	0.0599252	0	0	0	0	0	F19
No	596.451	15.933	0.102	4	4	679080	16	0.1	0.436687	No warnings	97.8014	0	0.156524	1.97952	0	0	1.37893e-06	1.34076e-05	0.00371177	0	1.4453e-06	0.0395188	6.9344e-06	0.00947885	0	0.00980645	2.93011e-05	F20
No	596.451	15.86	0.078	5	4	607163	16	0.2	1.12348	Contaminating mass	93.6867	0.867209	0.0781336	5.30065	0	0	0	0	0	0	0	0	0	4.87617e-06	1.93524e-05	0.026061	0.0411919	F18
No	596.451	15.901	0.13	5	4	984054	16	0	0.0343585	No warnings	99.9497	0	0	0	0	0.019109	1.11941e-05	0.00213783	0	0	0	0	0	8.9422e-07	3.48085e-06	0.0259599	0.0031062	F17
No	596.451	15.908	0.111	3	4	420813	16	0.1	0.779295	No warnings	93.2368	3.56556	1.95804	0	1.23723	0	0	0	0	0	0	0	0	0	0	0	0.00238445	F46
No	596.451	15.927	0.128	4	4	587817	16	0.1	0.687484	No warnings	95.5637	1.1628	0.035498	3.22753	0	0	4.83365e-06	4.37104e-05	0.0103801	0	0	0	0	0	0	0	0	F45
No	596.451	15.867	0.091	4	4	430996	16	0.1	0.399568	No warnings	96.3834	2.69123	0	0	0.925369	0	0	0	0	0	0	0	0	0	0	0	2.36448e-05	F48
No	596.451	15.909	0.117	4	4	413657	16	0	0.261643	No warnings	98.6188	0.44875	0	0	0.931822	0	0	0	0	0	0	0	0	0	0	0	0.000640272	F47
No	596.451	15.866	0.087	4	4	935476	16	0.1	0.495911	No warnings	97.9596	0.0439701	0.104452	0.997615	0.735966	0	0	0	2.93139e-05	7.92921e-05	0.00026732	0.157396	0	0	0	0	0.000626219	F4
No	596.451	15.86	0.078	4	4	573435	16	0	0.272625	No warnings	98.8396	0.0862511	0	0.0385756	1.0313	0	1.98256e-06	1.79281e-05	0.00425746	0	0	0	0	0	0	0	3.91133e-05	F19
No	596.883	16.347	0.074	2	1	1736.77	16	0	0	No warnings	100	0	0	0	0	0	0	0	0	0	0	0	0	0	0	0	0	F48
No	596.883	16.356	0.067	2	1	1232.54	16	0	0	No warnings	100	0	0	0	0	0	0	0	0	0	0	0	0	0	0	0	0	F17
No	596.883	16.351	0.06	2	1	1524.06	16	0	0	No warnings	100	0	0	0	0	0	0	0	0	0	0	0	0	0	0	0	0	F4
No	596.883	16.35	0.053	2	1	1304.17	16	0	0	No warnings	100	0	0	0	0	0	0	0	0	0	0	0	0	0	0	0	0	F18
No	596.892	14.93	0.019	4	1	1463.48	16	5.3	32.9827	Irregular exchange	46.3685	0	0	12.8315	0	0	0	0.057499	0	0.00443454	0.0358256	0	40.7023	0	0	0	0	F48
No	596.892	14.938	0.058	4	1	1069.88	16	2.2	13.7448	Irregular exchange	77.9486	0	0	4.94531	0	0	0	0.0317061	0	0.00108497	0.0150191	0	17.0583	0	0	0	0	F47
No	596.892	14.965	0.029	3	1	1089.63	16	4.5	28.0681	Contaminating mass	62.568	0	0	0	0	0	0	0	0	0.00944378	0.032878	0	37.3896	0	0	0	0	F17
No	596.892	14.943	0.06	4	1	2250.12	16	2.2	13.7335	Contaminating mass	77.6046	0	0	5.40168	0	0	0	0.0727282	0	0	0.0143829	0	16.9066	0	0	0	0	F19
No	596.892	14.943	0.051	4	1	1867.23	16	2.5	15.6312	Contaminating mass	74.776	0	0	5.81219	0	0	0	0.0488925	0	0	0.0170267	0	19.3459	0	0	0	0	F18
No	597.4	15.747	0.055	3	1	2658.67	16	0.6	3.96405	Irregular exchange	82.5486	0	0	16.0673	0	0	0	0	4.84711e-05	0.000106092	0.00166125	1.38226	0	0	0	0	0	F48
No	597.4	15.733	0.048	2	1	2358.45	16	2	12.2567	Irregular exchange	34.6308	0	0	65.3692	0	0	0	0	0	0	0	0	0	0	0	0	0	F47
No	597.4	15.734	0.042	1	1	1738.84	16	0.1	0.389655	No warnings	99.6103	0	0	0	0	0	0	0	0	0	0	0	0	0	0	0	0.389655	F4
No	597.4	15.732	0.042	2	1	1064.09	16	1	6.46494	Contaminating mass	66.0841	0	0	33.7858	0	0	0	0	0	0	0	0	0	0	0	0	0.1301	F19
No	597.4	15.732	0.05	2	1	1977.54	16	0.5	3.39718	Contaminating mass	82.5116	0	0	17.3431	0	0	0	0	0	0	0	0	0	0	0	0	0.145354	F18
No	597.447	16.64	0.034	4	1	38406.7	16	0.1	0.342425	No warnings	99.4245	0.157462	0	0	0	0	0	0	0	0	1.19202e-05	4.47895e-05	0.11303	0.304951	0	0	0	F47
No	597.447	16.634	0.111	3	1	96604.6	16	0	0.178144	No warnings	98.891	0.961775	0	0	0	0	0	0	0	0	4.65802e-06	1.75106e-05	0.0251706	0.122019	0	0	0	F20
No	597.447	16.634	0.123	3	1	90696.4	16	0	0.176911	No warnings	98.5991	1.28173	0	0	0	0	0	0	0	0	4.40913e-06	1.65853e-05	6.07633e-05	0.119069	0	0	0	F45
No	597.447	16.647	0.114	3	1	121700	16	0.1	0.343229	No warnings	95.8632	3.99011	0	0	0.0131056	0.0358869	0	0	0	0	3.61445e-06	1.35961e-05	4.98116e-05	0.0976087	0	0	0	F46
No	597.447	16.629	0.015	2	1	17704.2	16	0.1	0.625138	Contaminating mass	89.9978	10.0022	0	0	0	0	0	0	0	0	0	0	0	0	0	0	0	F18
No	597.447	16.633	0.022	2	1	24610.3	16	0	0	No warnings	100	0	0	0	0	0	0	0	0	0	0	0	0	0	0	0	0	F4
No	597.448	16.002	0.025	4	1	2439.41	16	3.2	19.9525	Contaminating mass	25.8382	0	0	0	65.4007	7.0319	0	0	0	0	6.39893e-05	0.000240702	0.000881852	1.72804	0	0	0	F20
No	597.448	15.99	0.038	4	1	10367	16	4	25.0265	Irregular exchange	4.08487	0.817239	0	0	75.8822	19.2157	0	0	0	0	0	0	0	0	0	0	0	F48
No	597.448	15.979	0.026	2	1	1852.35	16	4.2	26.2165	No warnings	0	0	0.00378539	0	80.5243	19.4719	0	0	0	0	0	0	0	0	0	0	0	F47
No	597.448	15.947	0.022	2	1	3426.79	16	4.5	28.1701	Contaminating mass	0.072999	7.22735	0	0.125059	19.7544	72.8202	0	0	0	0	0	0	0	0	0	0	0	F18
No	597.448	15.983	0.042	4	1	7618.09	16	2	12.3514	Contaminating mass	53.1669	0	0	0	36.5421	10.2909	0	0	0	0	0	0	0	0	0	0	0	F4
No	597.448	15.955	0.018	2	1	1073.38	16	3.8	23.6805	Contaminating mass	0.228255	22.7593	0	0.182829	28.5671	48.2625	0	0	0	0	0	0	0	0	0	0	0	F17
No	597.448	15.976	0.038	3	1	1386.46	16	4	24.9058	Contaminating mass	0.10477	10.4251	0	0	59.2822	30.1879	0	0	0	0	0	0	0	0	0	0	0	F19
No	597.48	16.852	0.163	3	1	29508	16	0	0.0959598	No warnings	99.8819	0	0	0	0	0	0	0	0	0	1.20207e-05	0	0.000461319	0.117669	0	0	0	F45
No	597.48	16.85	0.108	3	1	32612.5	16	0	0	No warnings	100	0	0	0	0	0	0	0	0	0	0	0	0	0	0	0	0	F46
No	597.48	16.84	0.113	3	1	61970.4	16	0	0	No warnings	100	0	0	0	0	0	0	0	0	0	0	0	0	0	0	0	0	F48
No	597.48	16.833	0.219	2	1	40807.5	16	0	0	No warnings	100	0	0	0	0	0	0	0	0	0	0	0	0	0	0	0	0	F47
No	597.48	16.833	0.107	3	1	115120	16	0	0.0999581	No warnings	98.4007	1.59933	0	0	0	0	0	0	0	0	0	0	0	0	0	0	0	F18
No	597.48	16.867	0.233	3	1	377124	16	0	0	No warnings	100	0	0	0	0	0	0	0	0	0	0	0	0	0	0	0	0	F4
No	597.48	16.832	0.149	3	1	102000	16	0	0	No warnings	100	0	0	0	0	0	0	0	0	0	0	0	0	0	0	0	0	F17
No	597.48	16.859	0.144	2	1	33028.9	16	0	0	No warnings	100	0	0	0	0	0	0	0	0	0	0	0	0	0	0	0	0	F20
No	597.48	16.857	0.125	2	1	37890.5	16	0	0	No warnings	100	0	0	0	0	0	0	0	0	0	0	0	0	0	0	0	0	F19
No	597.481	17.255	0.066	4	1	130027	16	0	0	No warnings	100	0	0	0	0	0	0	0	0	0	0	0	0	0	0	0	0	F46
No	597.481	17.257	0.065	2	1	64032.9	16	0	0	No warnings	100	0	0	0	0	0	0	0	0	0	0	0	0	0	0	0	0	F45
No	597.481	17.25	0.057	2	1	143354	16	0	0	No warnings	100	0	0	0	0	0	0	0	0	0	0	0	0	0	0	0	0	F48
No	597.481	17.254	0.079	2	1	117583	16	0	0	No warnings	100	0	0	0	0	0	0	0	0	0	0	0	0	0	0	0	0	F47
No	597.481	17.252	0.061	2	1	248049	16	0	0	No warnings	100	0	0	0	0	0	0	0	0	0	0	0	0	0	0	0	0	F18
No	597.481	17.256	0.07	2	1	1.20247e+06	16	0	0	No warnings	100	0	0	0	0	0	0	0	0	0	0	0	0	0	0	0	0	F4
No	597.481	17.262	0.067	2	1	269244	16	0	0	No warnings	100	0	0	0	0	0	0	0	0	0	0	0	0	0	0	0	0	F17
No	597.481	17.252	0.066	2	1	68134	16	0	0	No warnings	100	0	0	0	0	0	0	0	0	0	0	0	0	0	0	0	0	F20
No	597.481	17.261	0.063	2	1	93428.5	16	0	0	No warnings	100	0	0	0	0	0	0	0	0	0	0	0	0	0	0	0	0	F19
No	597.878	17.913	0.094	2	1	3736.99	16	2.5	15.595	Contaminating mass	80.9032	0	0	0	0	0	0	0	0	0	0.000474379	0.0594961	0	18.576	0	0	0.460866	F18
No	597.878	17.921	0.037	3	1	2331.27	16	4.1	25.7582	Low pattern fit	71.1938	0	0	0	0	0	0	0	0	0	0.000391999	0.052887	0	16.1673	0	0	12.5856	F45
No	597.878	17.916	0.053	3	1	4325.18	16	3.4	21.0871	Irregular exchange	77.2165	0	0	0	0	0	0	0	0	0	0.00019208	0.0232831	0	7.34435	0	4.99309	10.4226	F48
No	597.878	17.958	0.05	3	1	10272.4	16	0.9	5.54537	Contaminating mass	93.9165	0	0	0	0	0	0	0	0	0	0	0.0695749	0	1.86451	0	2.66834	1.48105	F4
No	597.878	17.942	0.158	1	1	1625.3	16	15.3	95.8486	Low pattern fit	0	0	0	0	0	0	0	0	0	0	0	0	0	0	0	66.4216	33.5784	F46
No	597.878	17.934	0.103	1	1	2208.95	16	2.4	14.8953	Contaminating mass	84.4596	0	0	0	0	0	0	0	0	0	0	0	0	0	0	10.3222	5.21822	F20
No	597.878	17.942	0.048	2	1	4502.98	16	1.7	10.5927	Irregular exchange	88.9485	0	0	0	0	0	0	0	0	0	0	0	0	0	0	7.34057	3.71091	F47
No	597.878	17.923	0.097	1	1	2331.22	16	1.4	8.45711	Contaminating mass	91.1766	0	0	0	0	0	0	0	0	0	0	0	0	0	0	5.86064	2.96276	F17
No	598.011	17.127	0.037	2	1	10148.2	16	3.1	19.1126	Low pattern fit	80.3182	0	0	0	0	0	0	0	0	0	0	0	0	0	0	9.10687	10.5749	F45
No	598.011	17.174	0.023	1	1	8055.03	16	0.2	1.13952	No warnings	98.8244	0	0	0	0	0	0	0	0	0	0	0	0	0	0	0.5776	0.598017	F48
No	598.011	17.15	0.023	1	1	6564.59	16	1.5	9.14949	Low pattern fit	90.5711	0	0	0	0	0	0	0	0	0	0	0	0	0	0	4.47083	4.95808	F47
No	598.011	17.109	0.071	2	1	12257.7	16	4.3	27.1183	Contaminating mass	72.0225	0	0	0	0	0	0	0	0	0	0	0	0	0	0	13.7458	14.2317	F17
No	598.011	17.15	0.064	1	1	8814.11	16	0	0	No warnings	100	0	0	0	0	0	0	0	0	0	0	0	0	0	0	0	0	F4
No	598.011	17.13	0.036	2	1	11882.3	16	2	12.6774	Contaminating mass	86.9562	0	0	0	0	0	0	0	0	0	0	0	0	0	0	5.86275	7.1811	F20
No	598.011	17.148	0.026	2	1	13112.5	16	1.4	8.85433	Contaminating mass	90.8782	0	0	0	0	0	0	0	0	0	0	0	0	0	0	4.27933	4.84246	F18
No	598.011	17.124	0.029	2	1	14546.2	16	3.5	21.8625	Contaminating mass	77.4774	0	0	0	0	0	0	0	0	0	0	0	0	0	0	10.5615	11.9611	F19
No	598.083	12.377	0.06	2	1	1142.88	16	0	0	No warnings	100	0	0	0	0	0	0	0	0	0	0	0	0	0	0	0	0	F45
No	598.083	12.385	0.056	2	1	1233.81	16	0	0	No warnings	100	0	0	0	0	0	0	0	0	0	0	0	0	0	0	0	0	F48
No	598.083	12.378	0.056	2	1	1218.12	16	0	0	No warnings	100	0	0	0	0	0	0	0	0	0	0	0	0	0	0	0	0	F46
No	598.083	12.384	0.05	3	1	1067.37	16	0.3	2.14011	Contaminating mass	94.2907	0	0	0	0	0.0138709	5.69539	0	0	0	0	0	0	0	0	0	0	F4
No	598.306	16.304	0.054	2	1	1048.38	16	0	0.216361	No warnings	96.5382	3.46178	0	0	0	0	0	0	0	0	0	0	0	0	0	0	0	F45
No	598.306	16.309	0.05	2	1	2717.9	16	0.8	4.80324	No warnings	90.6506	4.7145	0	0	0	0	0	0	0	0	0	0	0	0	0	2.02181	2.61314	F47
No	598.306	16.309	0.054	2	1	1455.99	16	0.5	2.97448	No warnings	96.9422	0	0	0	0	0	0	0	0	0	0	0	0	0	0	1.33386	1.72398	F48
No	598.306	16.298	0.05	2	1	1341.76	16	0.3	1.99775	Low pattern fit	91.1445	7.16671	0	0	0	0	0	0	0	0	0.267091	0	0	0	0	0.620142	0.801519	F46
No	598.306	16.308	0.046	3	1	1345.83	16	0.9	5.39137	Contaminating mass	87.471	5.37432	0	0	0	0	0	0	0.00343893	0.00526777	0	6.66352	0	0	0	0.205392	0.277065	F17
No	598.306	16.245	0.08	3	1	10383	16	8.9	55.6083	Contaminating mass	11.1711	0	0	0	0	0	0	0	0.065285	0.112486	88.0072	0.415237	0	0	0	0.0997485	0.128923	F4
No	598.306	16.31	0.053	3	1	1460.75	16	2.1	13.1659	Contaminating mass	85.9933	0	0	0	0	0	0	0	0.00110669	0.00169524	0	2.1444	0	0	0	2.71017	9.14933	F19
No	598.306	16.308	0.06	2	1	1318.63	16	0.6	3.82267	Contaminating mass	96.0702	0	0	0	0	0	0	0	0	0	0	0	0	0	0	1.71422	2.21559	F18
[truncated: 19,283 more rows]
